# Supplementary material for: Multi-Omics of Campylobacter jejuni Growth in Chicken Exudate Reveals Molecular Remodelling Associated with Altered Virulence and Survival Phenotypes
Source: MDPI journal article supplement (doi:10.3390/microorganisms12050860), 2024-04-25

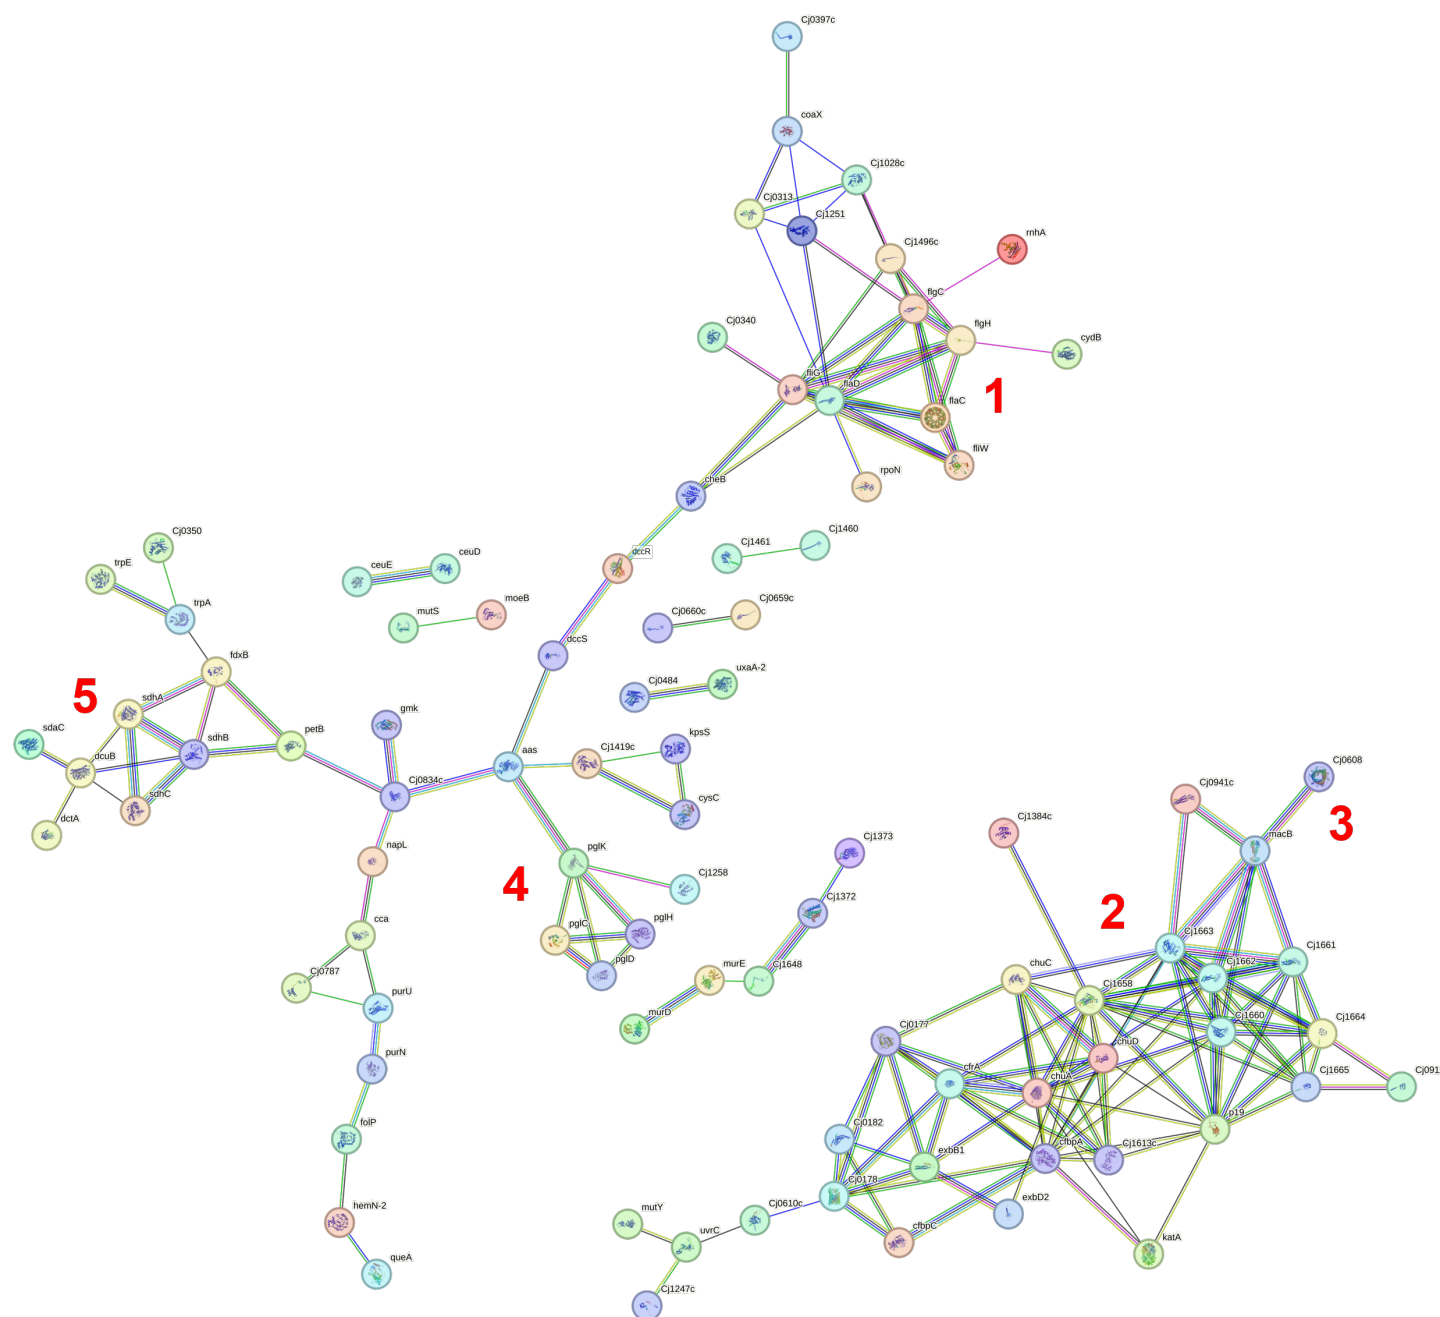

**Supplementary Figure S1A. STRINGdb analysis of proteins significantly elevated in abundance in *C. jejuni* grown in MH medium with 5% CE compared with MH only control.** Enriched functions included (1) flagellar motility, (2) iron uptake and antioxidants, (3) antibiotic resistance, (4) the *pgl*-encoded protein glycosylation system and (5) nutrient transporters and metabolism. Minimum required interaction score was set to confidence 0.700, cut-off for inclusion was >+1.5 fold-change; 181 edges observed, 74 expected with PPI enrichment *p*-value <1.0e-16.

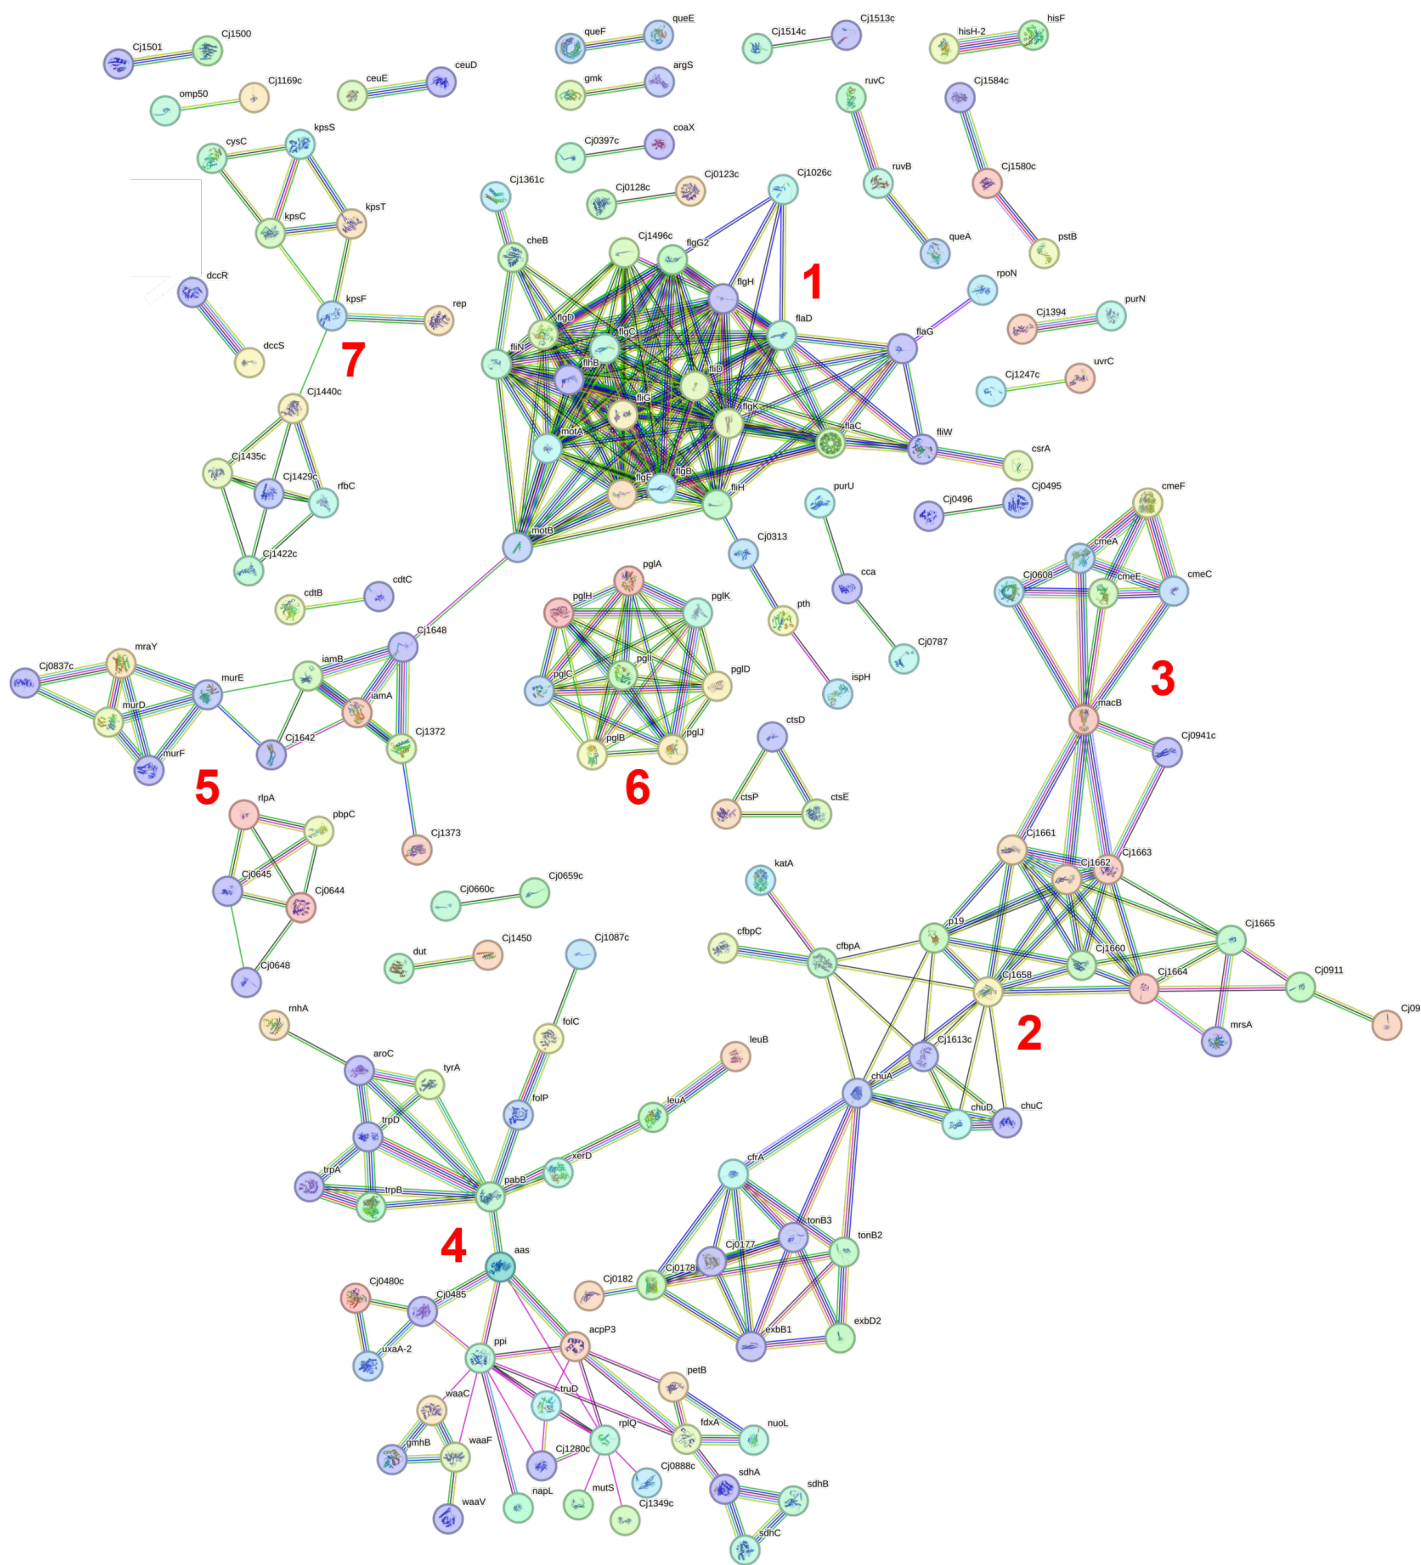

**Supplementary Figure S1B. STRINGdb analysis of proteins significantly elevated in abundance in *C. jejuni* grown in 100% CE compared with MH only control.**

Enriched functions included (1) flagellar motility, (2) iron uptake and antioxidants, (3) antibiotic resistance, (4) nutrient transport and metabolism, (5) peptidoglycan structure and cell shape, (6) the *pgl*-encoded protein glycosylation system and (7) lipooligosaccharide. Minimum required interaction score was set to confidence 0.700, cut-off for inclusion was  $>+1.5$  fold-change; 381 edges observed, 182 expected with PPI enrichment  $p$ -value  $<1.0e-16$ .

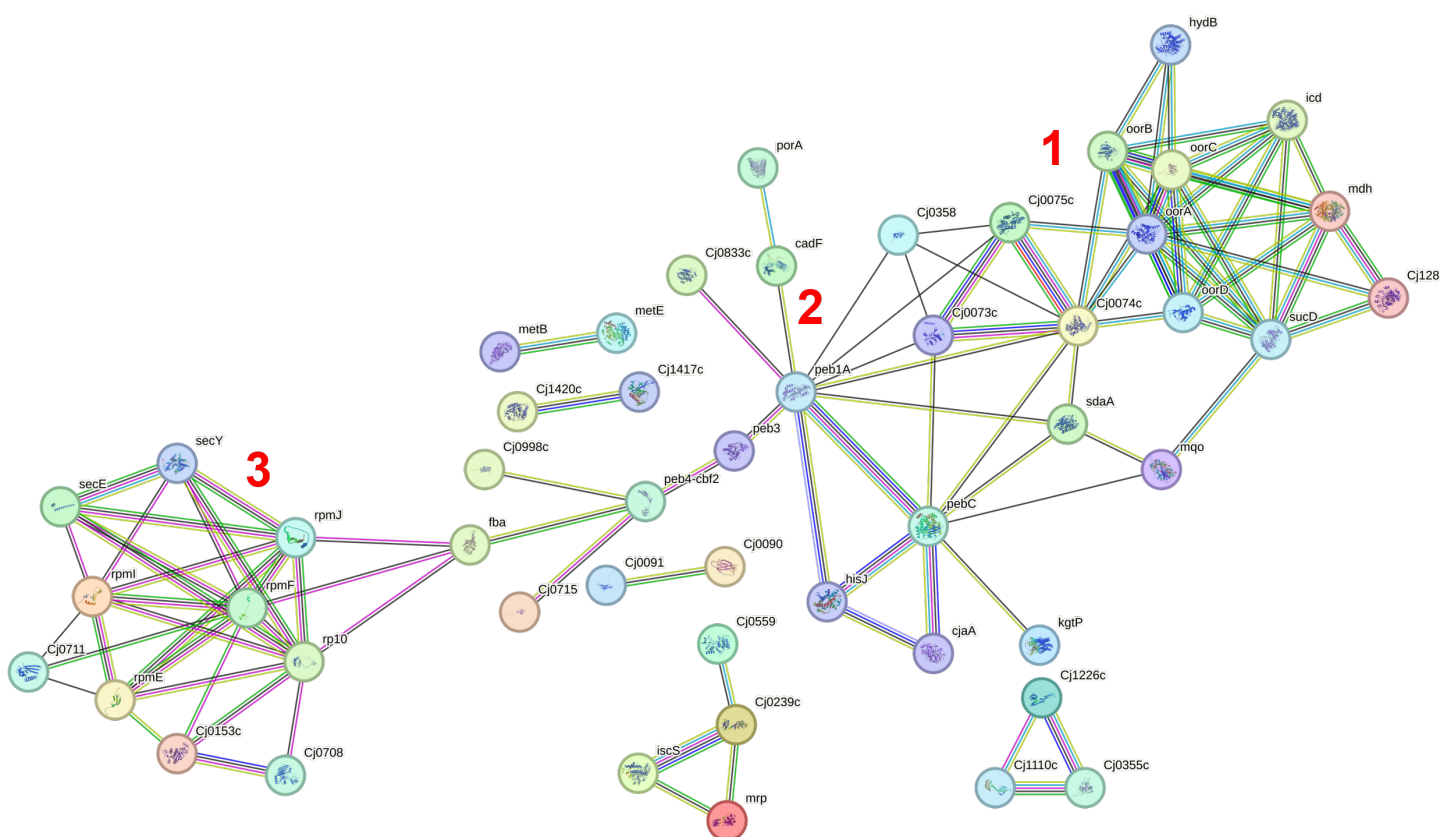

**Supplementary Figure S1C. STRINGdb analysis of proteins significantly reduced in abundance in *C. jejuni* grown in MH medium with 5% CE compared with MH only control.** Enriched functions included (1) metabolism, (2) virulence and antigenicity and (3) translation and protein secretion. Minimum required interaction score was set to confidence 0.700, cut-off for inclusion was <-1.5 fold-change (<0.67-fold); 104 edges observed, 52 expected with PPI enrichment  $p$ -value =  $8.9 \times 10^{-11}$ .

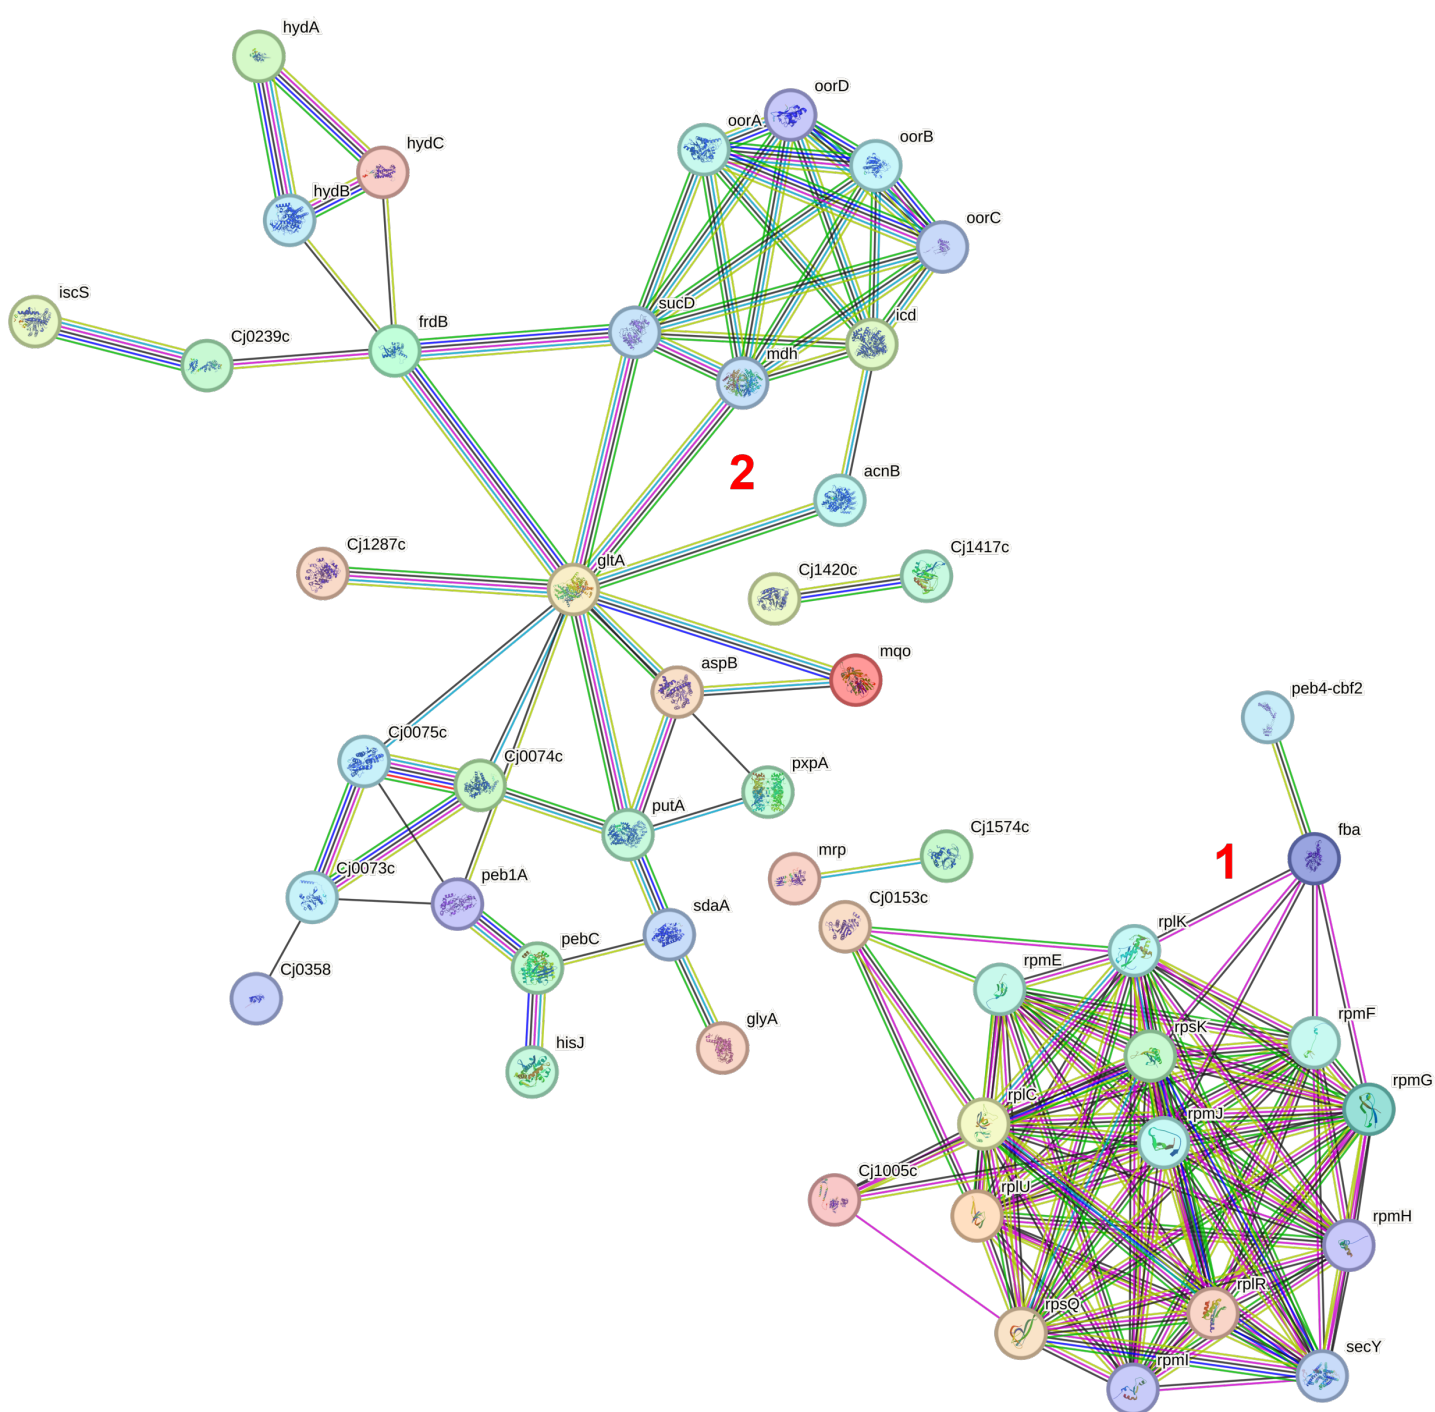

**Supplementary Figure S1D. STRINGdb analysis of proteins significantly reduced in abundance in *C. jejuni* grown in 100% CE compared with MH only control.** Enriched functions included (1) translation and (2) metabolism. Minimum required interaction score was set to confidence 0.700, cut-off for inclusion was  $<-1.5$  fold-change ( $<0.67$ -fold); 150 edges observed, 96 expected with PPI enrichment  $p$ -value  $=2.7e-7$ .



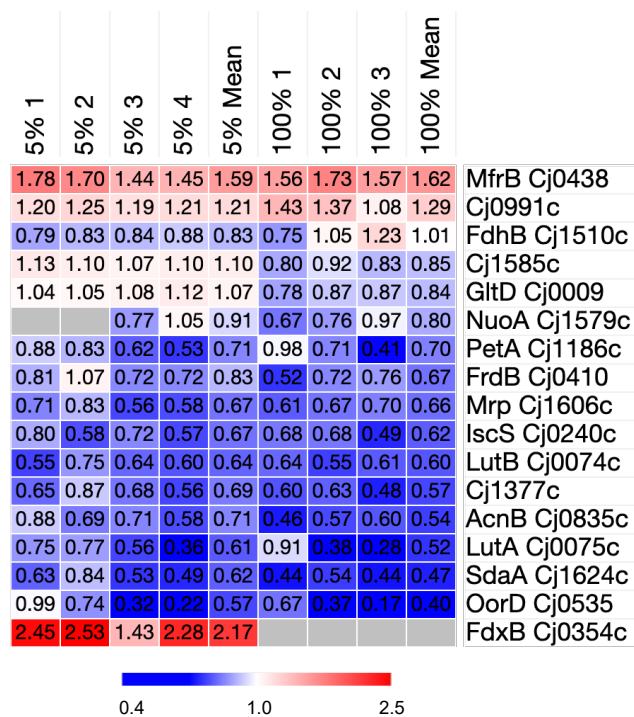

**Supplementary Figure S2. Elevated abundances of iron acquisition proteins correlate with reduced abundances of proteins containing Fe-S clusters.** Heat map showing replicate (MH+5% CE [left;  $n=4$ ] and 100% CE [right;  $n=3$ ] compared with MH only control) and mean  $n$ -fold data for proteins containing Fe-S clusters.

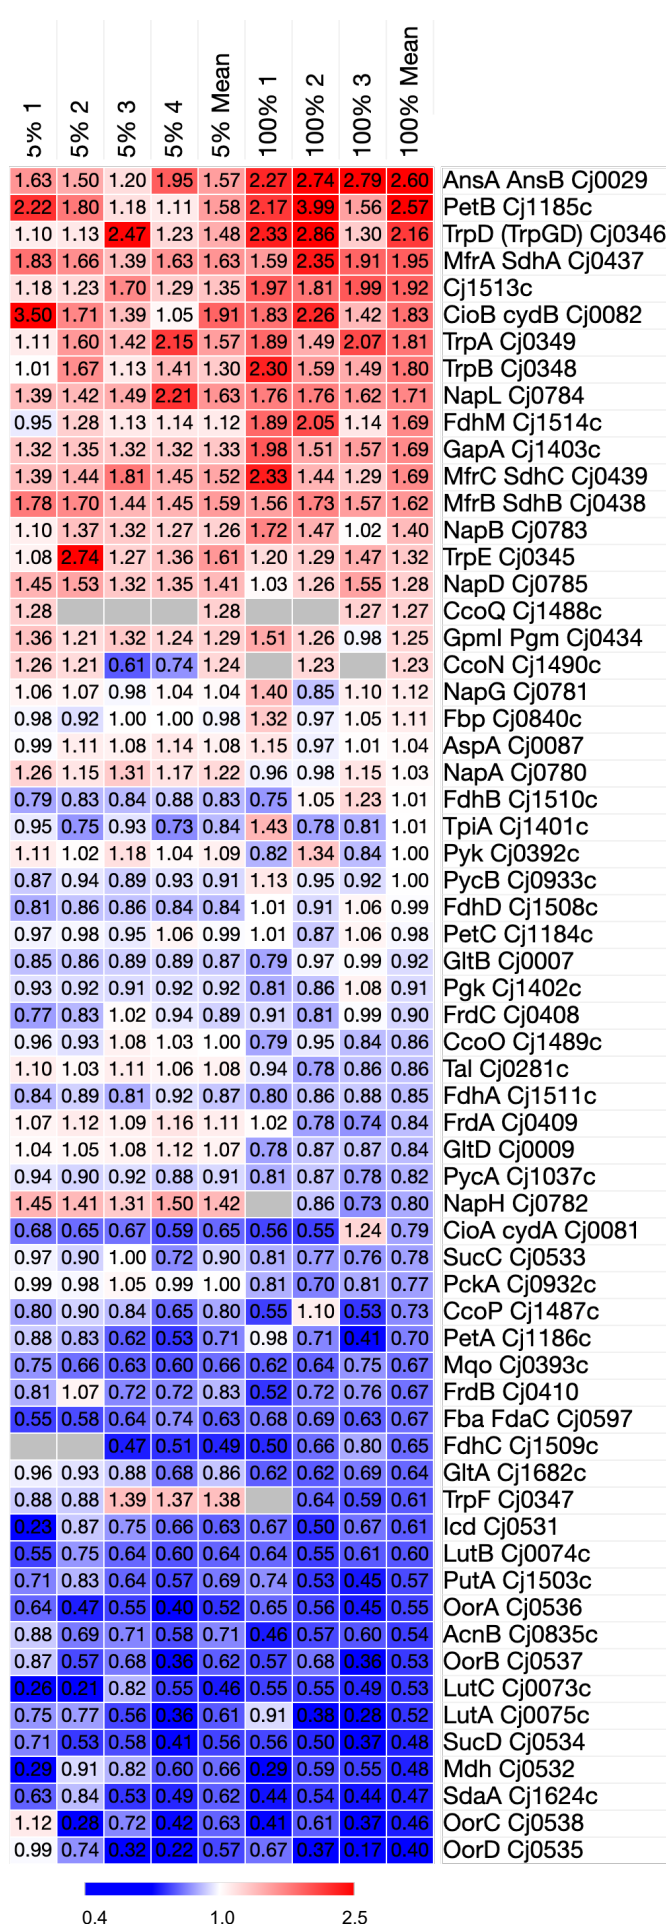

**Supplementary Figure S3. Growth in CE alters *C. jejuni* proteins associated with metabolism.** Heat maps showing replicate (MH+5% CE [left;  $n=4$ ] and 100% CE [right;  $n=3$ ] compared with MH only control) and mean  $n$ -fold data for proteins involved in metabolism.

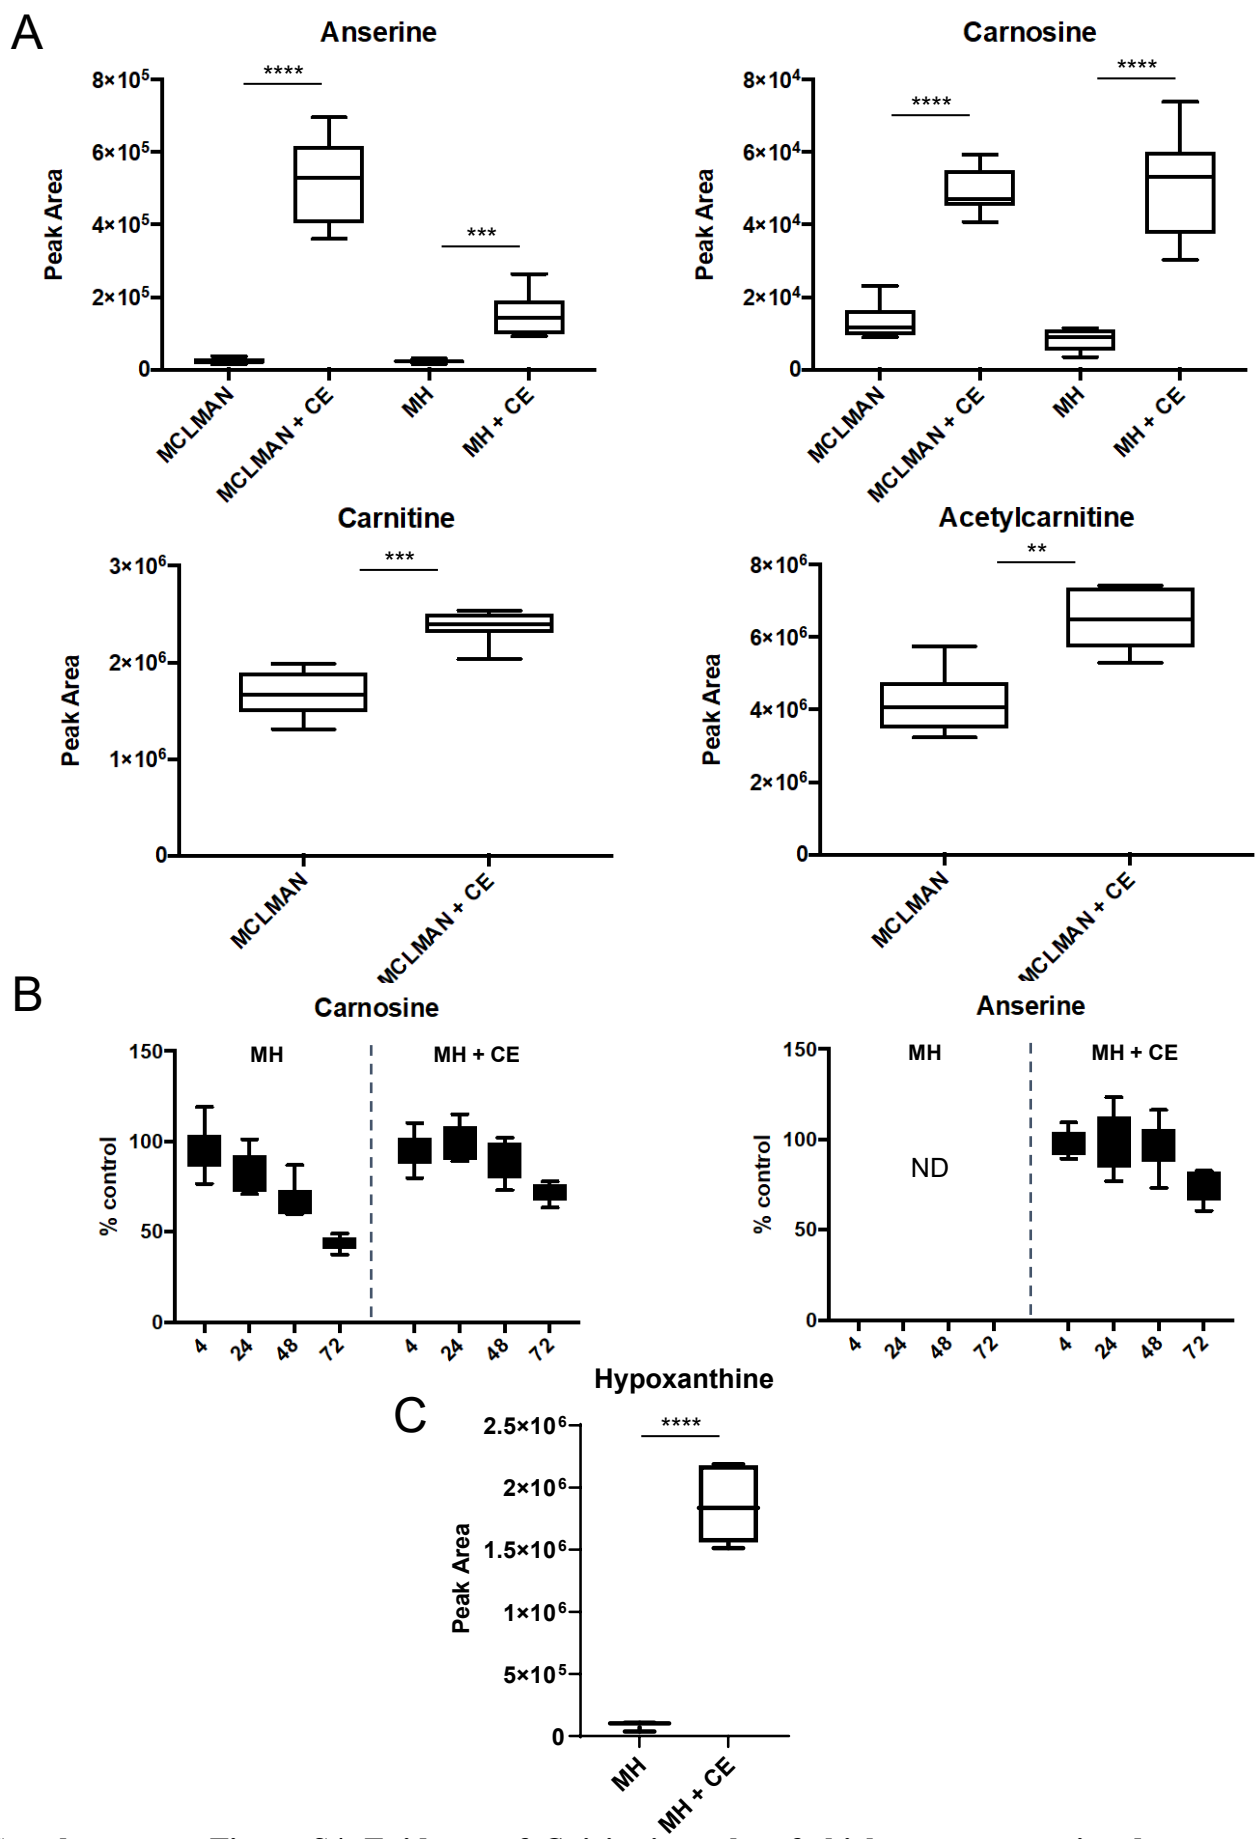

**Supplementary Figure S4. Evidence of *C. jejuni* uptake of chicken meat-associated compounds carnosine and anserine. (A) Intracellular metabolite abundances as determined by targeted LC-MS/MS. (B) Culture supernatant levels as determined by targeted LC-MS/MS, box and whisker plots based on peak area values determined as a % of the corresponding non-inoculated control (MH and MH+5%CE) at each time-point. (C) Intracellular abundance of hypoxanthine. \*\*,  $p < 0.01$ ; \*\*\*,  $p < 0.001$ ; \*\*\*\*,  $p < 0.0001$ ; ND, not detected.**

A

| 5% 1 | 5% 2 | 5% 3 | 5% 4 | 5% Mean | 100% 1 | 100% 2 | 100% 3 | 100% Mean |                           |
|------|------|------|------|---------|--------|--------|--------|-----------|---------------------------|
| 1.17 | 1.72 | 1.50 | 1.64 | 1.51    | 1.71   | 1.76   | 2.06   | 1.84      | CheB <sup>+</sup> Cj0924c |
| 1.19 | 1.14 | 1.23 | 1.29 | 1.21    | 1.80   | 1.08   | 1.06   | 1.31      | Tlp6 Cj0448c              |
| 0.97 | 0.97 | 1.05 | 1.02 | 1.00    | 1.19   | 0.97   | 0.95   | 1.04      | CheR Cj0923c              |
| 0.71 | 0.79 | 0.75 | 0.82 | 0.77    | 1.28   | 0.90   | 0.77   | 0.98      | Tlp10 Cj0019c             |
| 0.86 | 0.86 | 0.86 | 0.89 | 0.87    | 0.82   | 0.94   | 1.13   | 0.96      | Tlp2 Cj0144               |
| 1.08 | 1.01 | 1.13 | 0.95 | 1.04    | 0.86   | 1.35   | 0.64   | 0.95      | CheY Cj1118c              |
| 1.06 | 1.11 | 1.11 | 1.13 | 1.10    | 1.19   | 0.74   | 0.87   | 0.93      | Cj0700                    |
| 0.68 | 0.73 | 0.74 | 0.74 | 0.73    | 0.86   | 0.87   | 1.05   | 0.93      | Tlp4 Cj0262c              |
| 1.08 | 1.02 | 1.12 | 1.03 | 1.06    | 0.87   | 1.15   | 0.73   | 0.92      | CheA Cj0284c              |
| 1.17 | 1.14 | 1.16 | 1.12 | 1.15    | 0.91   | 0.98   | 0.82   | 0.91      | CheV Cj0285c              |
| 1.13 | 1.06 | 1.10 | 1.01 | 1.08    | 0.99   | 1.00   | 0.72   | 0.90      | CheW Cj0283c              |
| 0.95 | 0.78 | 0.91 | 0.84 | 0.87    | 0.85   | 0.78   | 0.98   | 0.87      | Aer1 CetC Cj1191c         |
| 0.82 | 0.86 | 0.78 | 0.86 | 0.83    | 0.83   | 0.96   | 0.75   | 0.84      | Tlp1 CcaA Cj1506c         |
| 0.65 | 0.72 | 0.66 | 0.63 | 0.66    | 0.88   | 0.74   | 0.68   | 0.77      | Tlp9 CetA Cj1190c         |
| 0.77 | 0.80 | 0.81 | 0.67 | 0.76    | 0.66   | 0.83   | 0.71   | 0.73      | Tlp3 CcmL Cj1564          |
| 0.75 | 0.71 | 0.76 | 0.71 | 0.73    | 0.73   | 0.69   | 0.71   | 0.71      | Aer2 CetB Cj1189c         |
| 0.31 | 0.71 | 0.73 | 0.48 | 0.56    | 0.59   | 0.67   | 0.53   | 0.60      | Tlp8 CetZ Cj1110c         |

B

| 5% 1 | 5% 2 | 5% 3 | 5% 4 | 5% Mean | 100% 1 | 100% 2 | 100% 3 | 100% Mean |              |
|------|------|------|------|---------|--------|--------|--------|-----------|--------------|
| 0.90 | 1.78 | 1.00 | 1.87 | 1.39    | 1.53   | 2.87   | 2.58   | 2.32      | MurF Cj0795c |
| 1.70 | 1.74 | 1.17 | 1.48 | 1.52    | 2.59   | 2.03   | 1.54   | 2.05      | MurE Cj1641  |
| 1.35 | 1.38 | 1.82 | 2.03 | 1.65    | 2.29   | 1.58   | 2.02   | 1.96      | MurD Cj0432c |
|      |      |      |      |         |        | 1.80   |        | 1.80      | MltD Cj0645  |
| 1.52 | 1.05 | 1.19 | 1.45 | 1.30    | 1.86   | 1.45   | 1.97   | 1.76      | MltG Cj0529c |
| 1.03 | 1.43 | 1.51 | 1.95 | 1.48    | 1.51   | 1.34   | 2.18   | 1.68      | CslT Cj0843c |
| 1.32 | 1.76 | 1.24 | 1.87 | 1.55    | 1.74   | 1.29   | 1.97   | 1.67      | PatA Cj0610c |
| 1.37 | 1.38 | 1.36 | 1.57 | 1.42    | 2.12   | 1.56   | 1.27   | 1.65      | RlpA Cj0646  |
|      |      | 0.90 | 1.09 | 1.00    |        | 1.59   | 1.65   | 1.62      | MraY Cj0433c |
| 1.80 | 1.27 | 1.02 | 1.16 | 1.31    | 1.89   | 1.46   | 1.50   | 1.61      | Csd1 Cj1087c |
| 1.49 | 1.65 | 1.14 | 1.45 | 1.44    | 1.82   | 1.30   | 1.44   | 1.52      | PbpC Cj0652  |
| 1.14 | 1.83 | 1.01 | 1.25 | 1.31    | 1.38   | 1.20   | 1.43   | 1.34      | PbpB Cj0525c |
| 1.36 | 1.27 | 1.31 | 1.18 | 1.28    | 1.43   | 1.18   | 1.24   | 1.29      | MurC Cj1054c |
| 1.19 | 1.18 | 1.35 | 1.34 | 1.27    | 1.27   | 1.27   | 1.09   | 1.21      | MurI Cj1652c |
| 0.99 | 1.02 | 0.95 | 0.98 | 0.99    | 1.91   | 0.77   | 0.86   | 1.18      | DdlA Cj0798c |
| 1.00 | 0.91 | 0.85 | 0.86 | 0.91    | 1.79   | 0.87   | 0.67   | 1.11      | CcmA Cj1086c |
| 0.85 | 0.82 | 0.90 | 0.92 | 0.87    | 1.40   | 1.12   | 0.77   | 1.10      | MreC Cj0277  |
| 0.91 | 0.81 | 0.79 | 0.88 | 0.85    | 0.88   | 1.00   | 1.31   | 1.06      | UppS Cj0824  |
| 1.10 | 0.97 | 1.15 | 1.06 | 1.07    | 0.81   | 1.33   | 1.03   | 1.06      | MurG Cj1039  |
| 0.79 | 0.90 | 0.80 | 0.92 | 0.85    | 0.83   | 1.06   | 1.27   | 1.05      | AmiA Cj1269c |
| 0.96 | 1.01 | 1.00 | 1.03 | 1.00    | 0.95   | 0.99   | 1.11   | 1.02      | MurA Cj0858c |
| 0.82 | 0.82 | 0.99 | 0.88 | 0.88    | 0.94   | 0.94   | 1.15   | 1.01      | MurB Cj1676  |
| 1.00 | 1.03 | 1.07 | 1.08 | 1.04    | 1.52   | 0.77   | 0.69   | 0.99      | MreB Cj0276  |
| 0.61 | 0.72 | 0.71 | 0.78 | 0.70    | 1.05   | 1.23   | 0.68   | 0.99      | Csd3 Cj1215  |
| 0.65 | 0.70 | 0.66 | 0.74 | 0.69    | 0.99   | 0.94   | 0.97   | 0.97      | Cj0131       |
| 0.87 | 0.88 | 0.87 | 0.88 | 0.88    | 0.76   | 1.25   | 0.79   | 0.93      | PbpA Cj0508  |
| 0.96 | 0.92 | 0.96 | 0.99 | 0.96    | 0.68   | 0.98   | 1.15   | 0.93      | Cj1275c      |
| 0.88 | 0.89 | 0.86 | 0.99 | 0.90    | 0.70   | 0.94   | 0.91   | 0.85      | Ape1 Cj0609c |
| 0.71 | 0.76 | 0.75 | 0.79 | 0.75    | 0.71   | 0.90   | 0.88   | 0.83      | Pgp2 Cj0906c |
| 0.74 | 0.77 | 0.68 | 0.80 | 0.75    | 1.08   | 0.81   | 0.52   | 0.80      | Pgp3 Cj1235  |

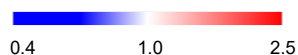

**Supplementary Figure S5. Growth in CE results in changes to abundances of proteins involved in chemotaxis and peptidoglycan (PGN) biosynthesis, modification and cell shape.** Heat map showing replicate (MH+5% CE [left;  $n=4$ ] and 100% CE [right;  $n=3$ ] compared with MH only control) and mean  $n$ -fold data for proteins involved in (A) chemotaxis and (B) PGN biosynthesis, modification and cell shape.



A

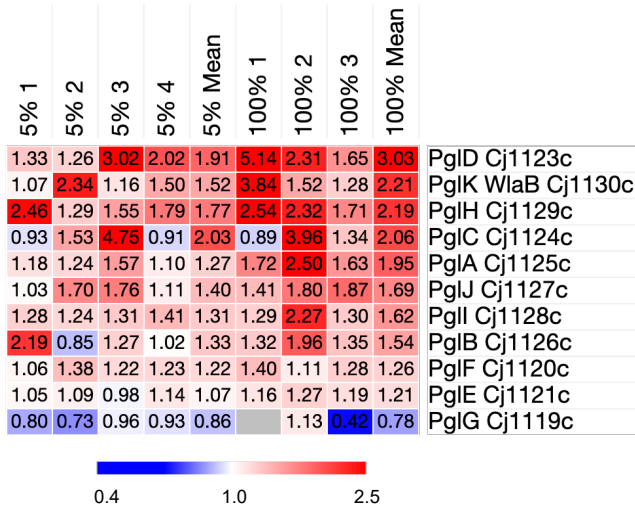

C

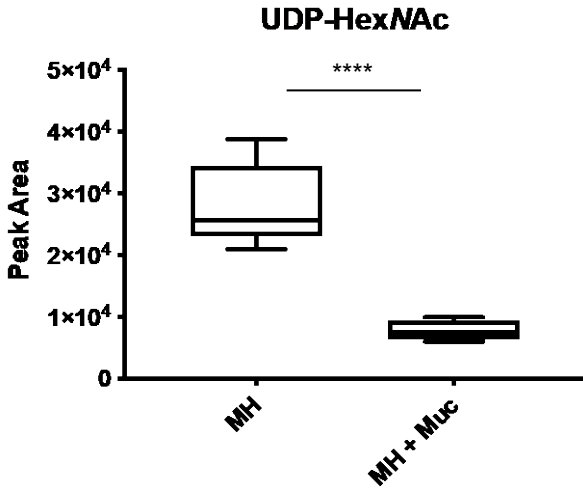

**Supplementary Figure S6. Growth in CE results in increased abundances of proteins associated with the Pgl *N*-linked glycosylation system.** Heat maps showing replicate (MH+5% CE [left; *n*=4] and 100% CE [right; *n*=3] compared with MH only control) and mean *n*-fold data for proteins involved in (A) biosynthesis and attachment of *N*-linked glycans to proteins (Pgl cluster); (B) known targets of *N*-linked glycosylation; (C) intracellular levels of UDP-HexNAc as determined by targeted intracellular metabolomics, \*\*\*\*, *p* < 0.0001.

B

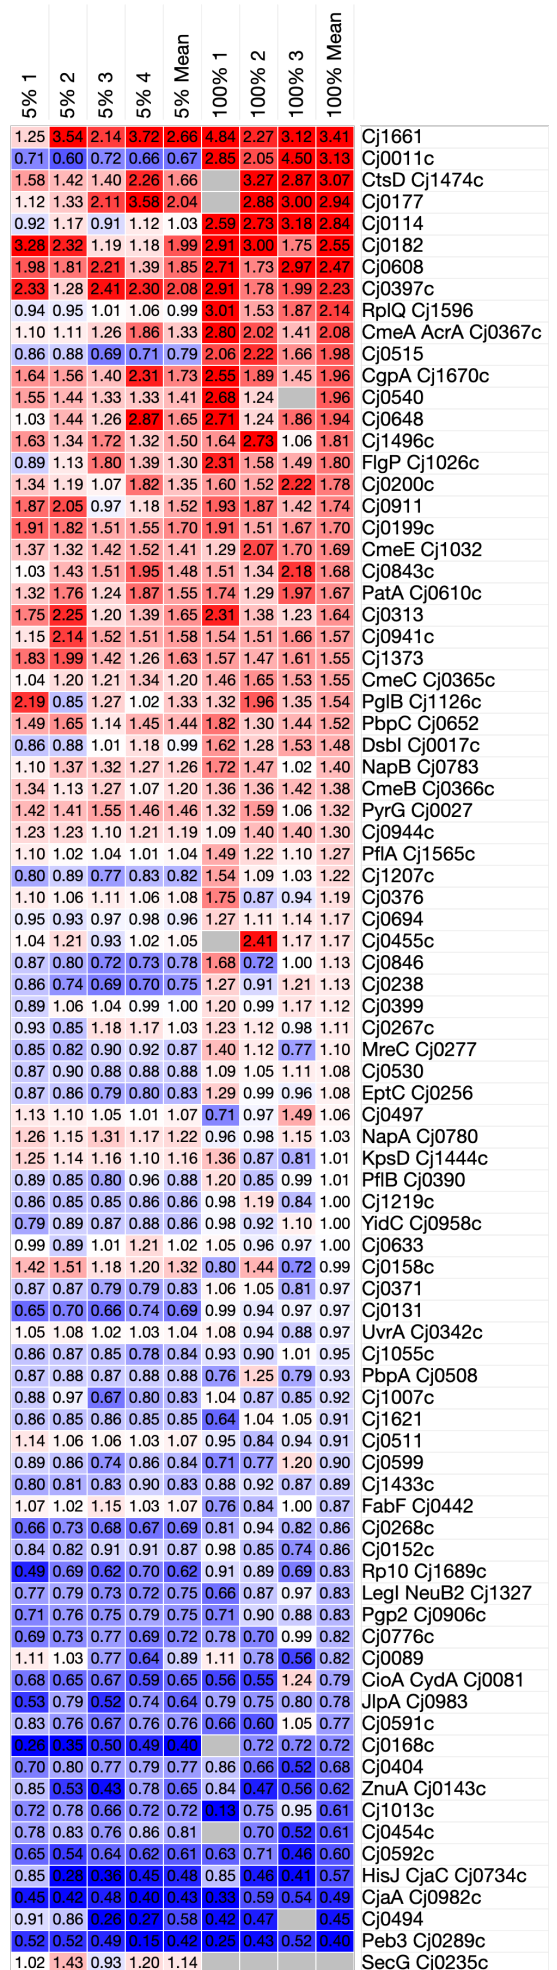

Supplement: s1 [file s1]
