# Supplementary material for: Multi-Omics of Campylobacter jejuni Growth in Chicken Exudate Reveals Molecular Remodelling Associated with Altered Virulence and Survival Phenotypes
Source: MDPI journal article supplement (doi:10.3390/microorganisms12050860), 2024-04-25
Supplement: s1 [file s1]

**Supplementary Table S1. Instrument settings for targeted metabolomics using LC-MS/MS.** Q1, precursor *m/z*; Q3, selected fragment ion *m/z*; Dwell (ms), dwell time on precursor; CE, collision energy (volts); CXP, collision cell exit potential (volts); DP, declustering potential (volts).

#### **Synergi-RP Negative Mode MRM**

| <b>Name</b>          | <b>Q1</b> | <b>Q3</b> | <b>Dwell (ms)</b> | <b>CE</b> | <b>CXP</b> | <b>DP</b> |
|----------------------|-----------|-----------|-------------------|-----------|------------|-----------|
| Hexose (Glu/Fuc/Gal) | 179       | 32        | 100               | -26       | -15        | -45       |
| Lactate              | 89        | 43        | 100               | -17       | -11        | -34       |
| Citrate              | 191       | 111       | 100               | -19       | -12        | -50       |
| Fumarate             | 115       | 71        | 100               | -16       | -9         | -35       |
| Succinate            | 117       | 73        | 100               | -24       | -10        | -24       |
| UDP-HexNAc           | 606       | 79        | 100               | -128      | -9         | -140      |

#### **Luna Phenyl-Hexyl MRM**

| <b>Name</b>        | <b>Q1</b> | <b>Q3</b> | <b>Dwell (ms)</b> | <b>CE</b> | <b>CXP</b> | <b>DP</b> |
|--------------------|-----------|-----------|-------------------|-----------|------------|-----------|
| Anserine           | 241       | 109.2     | 100               | 35        | 16         | 31        |
| Histidine          | 156       | 110       | 100               | 21        | 12         | 49        |
| Carnosine          | 227       | 110       | 100               | 33        | 14         | 51        |
| Carnitine          | 162.1     | 60        | 100               | 23        | 8          | 41        |
| Acetyl-carnitine   | 204       | 85        | 100               | 31        | 16         | 46        |
| Homocysteine       | 136       | 119       | 100               | 25        | 14         | 101       |
| Leucine/Isoleucine | 132.1     | 86.2      | 100               | 16        | 22         | 37        |
| Lysine             | 147.1     | 84.1      | 100               | 25        | 12         | 51        |
| Glutamate          | 148       | 84        | 100               | 23        | 10         | 54        |
| Glutamine          | 147       | 44        | 100               | 73        | 10         | 51        |
| Asparagine         | 133.1     | 74        | 100               | 22        | 10         | 56        |
| Proline            | 116       | 70        | 100               | 13        | 13         | 51        |
| Methionine         | 150       | 61        | 100               | 44        | 10         | 44        |
| Serine             | 106       | 88        | 100               | 15        | 10         | 46        |
| Alanine            | 90.1      | 44.1      | 100               | 16        | 8          | 41        |
| Homoserine         | 120       | 44        | 100               | 17        | 10         | 51        |
| Glycine            | 76        | 30        | 100               | 9         | 13         | 40        |
| Tryptophan         | 205.1     | 188.3     | 100               | 15        | 12         | 43        |
| Valine             | 118       | 72        | 100               | 16        | 15         | 61        |
| Threonine          | 120.1     | 74        | 100               | 15        | 8          | 44        |
| Cysteine           | 122       | 59        | 100               | 26        | 9          | 63        |
| Cystine            | 241       | 152       | 100               | 35        | 15         | 40        |
| Aspartate          | 134       | 74        | 100               | 20        | 13         | 85        |
| Arginine           | 175.1     | 70        | 100               | 32        | 10         | 25        |

**Supplementary Table S2. Quantitative proteomics of growth in 5% and 100% CE by TMT label-based shotgun proteomics displays profound changes in the *C. jejuni* NCTC11168 proteome at different stringencies.** Proteins were defined as altered in abundance at +/-1.5-fold mean *n*-fold change (<0.67 and >1.5-fold), when observed in 2 of 4 (5% CE) or 2 of 3 (100% CE) biological replicates and with  $p < 0.05$ . Data for all identified (1386 and 1326 proteins for 5% and 100% CE comparisons with MH controls, respectively) and quantified (1328 and 1304 proteins, respectively) proteins can be found in Data S1.

| Growth Comparison | ↑ @ 1.5-fold | ↑ @ 1.5-fold in 2 expt. | ↑ @ 1.5-fold in 2 expt. and $p < 0.05$ | ↓ @ 0.67-fold | ↓ @ 0.67-fold in 2 expt. | ↓ @ 0.67-fold in 2 expt. and $p < 0.05$ |
|-------------------|--------------|-------------------------|----------------------------------------|---------------|--------------------------|-----------------------------------------|
|                   |              |                         |                                        |               |                          |                                         |
| 5% CE             | 136          | 107                     | 79                                     | 98            | 88                       | 74                                      |
| 100% CE           | 277          | 214                     | 207                                    | 105           | 83                       | 78                                      |
|                   |              |                         |                                        |               |                          |                                         |
