# Supplementary material for: Multi-Omics of Campylobacter jejuni Growth in Chicken Exudate Reveals Molecular Remodelling Associated with Altered Virulence and Survival Phenotypes
Source: Microorganisms. 2024 Apr 25;12(5):860. doi: 10.3390/microorganisms12050860 (PMC11123243; doi:10.3390/microorganisms12050860)
Supplement: Supplementary file 1 [file microorganisms-12-00860-s001.zip › Supplementary Data_S1_S2_S3_Final.xlsx]

## Sheet: Data S1
Supplementary Data S1. Identification and quantitation of C. jejuni NCTC 11168 proteins grown in 5% and 100% CE compared to MH only controls. Proteins were digested with trypsin from n=4 biological replicates (MH compared with MH+5%CE; left data set) or n=3 biological replicates (MH compared with 100%CE; right data set). # Pept., number of peptides identified in each experiment; # Unique, number …
Accession	Cj number	Gene name	Protein name	# Pept. Exp1	# Unique Exp1	# Pept. Exp2	# Unique Exp2	n-fold 1	n-fold 2	n-fold 3	n-fold 4	Mean n-fold	FDR-adj p-value	Accession	Cj number	# Pept. Exp1	# Pept. Exp2	# Pept. Exp3	n-fold 1	n-fold 2	n-fold 3	Mean n-fold	FDR-adj p-value
Q9PJB0	Cj0001	dnaA Cj0001	Chromosomal replication initiator protein DnaA	23	21	27	21	0.951177	1.21552	0.801098	1.07662	1.0111	0.9373	Q9PJB0	Cj0001	21	21	21	0.820832	0.81796	0.934155	0.857649	0.0205
Q0PCC3	Cj0002	dnaN Cj0002	DNA polymerase III subunit beta (EC 2.7.7.7) (Beta sliding clamp)	48	48	49	49	1.1534	1.12444	1.14832	1.1134	1.13489	0.0034443	Q0PCC3	Cj0002	37	37	37	1.14273	1.16209	0.909192	1.07134	0.4296
O87667	Cj0003	gyrB Cj0003	DNA gyrase subunit B (EC 5.99.1.3)	46	45	39	39	1.26427	1.197	1.24044	1.25246	1.23854	0.0058194	O87667	Cj0003	49	46	48	0.938742	0.772236	1.29824	1.00307	0.9851
Q0PCC1	Cj0004c	sorB Cj0004c	Monohaem cytochrome C	3	3	2	2	1.24805	1.31959	1.20096	0.975049	1.18591	0.14267	Q0PCC1	Cj0004c	ND	2	ND	ND	1.13888	ND	1.13888	ND
Q0PCC0	Cj0005c	sorA Cj0005c	Molydopterin containing oxidoreductase	23	23	21	21	1.21571	1.29376	1.16521	1.2939	1.24214	0.0050618	Q0PCC0	Cj0005c	26	26	26	1.34557	1.26031	1.08608	1.23065	0.0391
Q0PCB8	Cj0007	gltB Cj0007	Glutamate synthase (NADPH) large subunit (EC 1.4.1.13)	70	70	69	69	0.848692	0.862357	0.88578	0.89435	0.872795	0.0013	Q0PCB8	Cj0007	73	71	73	0.785394	0.972069	0.990972	0.916145	0.2703
Q0PCB7	Cj0008	Cj0008	Putative uncharacterized protein (DUF262 domain-containing protein)	31	31	26	26	1.00421	0.899162	0.983006	0.896956	0.945832	0.31282	Q0PCB7	Cj0008	21	22	21	2.07932	2.04758	1.46955	1.86548	0.012
Q0PCB6	Cj0009	gltD Cj0009	Glutamate synthase (NADPH) small subunit (EC 1.4.1.13)	30	30	30	30	1.03813	1.05297	1.07883	1.11963	1.07239	0.0539	Q0PCB6	Cj0009	32	31	31	0.780838	0.867072	0.869673	0.839194	0.0053
Q9PJA1	Cj0010c	rnhB Cj0010c	Ribonuclease HII (RNase HII) (EC 3.1.26.4)	4	4	1	1	1.27809	0.997947	1.12575	0.646459	1.01206	0.82853	Q9PJA1	Cj0010c	3	ND	ND	1.06352	ND	ND	1.06352	ND
Q0PCB4	Cj0011c	Cj0011c	Putative non-specific DNA binding protein. Competence ComE-like protein	7	7	8	8	0.713704	0.601619	0.715108	0.661878	0.673077	0.0011709	Q0PCB4	Cj0011c	5	5	5	2.85277	2.04913	4.4986	3.1335	0.0116
Q0PCB3	Cj0012c	rrc Cj0012c	Non-haem iron protein	29	29	29	29	0.603248	0.396351	0.549995	0.376977	0.481643	0.003521	Q0PCB3	Cj0012c	30	30	30	0.447494	0.44539	0.382004	0.424963	4.62e-05
Q9PJ98	Cj0013	ilvD Cj0013	Dihydroxy-acid dehydratase (DAD) (EC 4.2.1.9)	44	44	37	37	1.23043	1.01985	1.39895	1.06907	1.17958	0.2356	Q9PJ98	Cj0013	34	37	34	0.874184	1.12954	1.30153	1.10175	0.4585
Q0PCB0	Cj0015c	Cj0015c	Putative uncharacterized protein (HD domain-containing protein)	24	24	24	24	0.939941	0.975172	0.998486	1.00242	0.979005	0.44443	Q0PCB0	Cj0015c	21	24	21	1.24889	1.23202	1.05806	1.17966	0.1422
P0C634	Cj0016	queC Cj0016	7-cyano-7-deazaguanine synthase (EC 6.3.4.20) (7-cyano-7-carbaguanine synthase) (PreQ(0) synthase) (Queuosine biosynthesis protein QueC)	12	12	14	14	1.16759	1.11427	1.16438	1.08222	1.13212	0.012234	P0C634	Cj0016	ND	6	6	ND	0.663005	1.052	0.857503	0.3981
Q0PCA8	Cj0017c	dsbI Cj0017c	Disulphide bond formation protein	34	34	34	34	0.860186	0.883368	1.0131	1.18392	0.985145	0.9004	Q0PCA8	Cj0017c	40	34	40	1.62296	1.28283	1.52733	1.47771	0.0092
Q0PCA6	Cj0019c	tlp10 Cj0019c	Putative MCP-domain signal transduction protein	31	30	27	26	0.708963	0.789873	0.751597	0.819591	0.767506	0.018343	Q0PCA6	Cj0019c	38	30	36	1.27717	0.897555	0.773491	0.982737	0.9148
Q0PCA5	Cj0020c	Cj0020c	Cytochrome C551 peroxidase (EC 1.11.1.5)	16	16	15	15	0.838403	0.450358	0.437896	0.494861	0.55538	0.0357	Q0PCA5	Cj0020c	18	15	18	0.53193	0.785784	0.525906	0.61454	0.0108
Q0PCA4	Cj0021c	Cj0021c	Putative fumarylacetoacetate (FAA) hydrolase family protein	21	21	13	13	0.634677	0.568826	0.509158	0.83269	0.636338	0.02612	Q0PCA4	Cj0021c	13	13	13	0.752787	0.553605	0.485188	0.597193	0.0074
Q0PCA3	Cj0022c	Cj0022c	Pseudouridine synthase (EC 5.4.99.-)	2	1	8	8	0.901388	1.00935	0.933792	1.04025	0.971194	0.63398	Q0PCA3	Cj0022c	7	5	7	0.569191	1.20747	0.517861	0.764839	0.3488
Q0PCA2	Cj0023	purB Cj0023	Adenylosuccinate lyase (EC 4.3.2.2)	43	43	37	37	1.10301	1.11812	1.34084	1.2832	1.21129	0.0767	Q0PCA2	Cj0023	34	35	34	1.48109	0.807898	0.848443	1.04581	0.8438
Q0PCA1	Cj0024	nrdA Cj0024	Ribonucleoside-diphosphate reductase (EC 1.17.4.1)	60	60	48	48	1.36719	1.22936	1.39814	1.15648	1.2878	0.0283	Q0PCA1	Cj0024	48	48	48	0.936825	0.989223	1.0432	0.989748	0.7553
Q0PCA0	Cj0025c	Cj0025c	Putative sodium:dicarboxylate family transmembrane symporter (Cystine transport TcyP)	2	2	3	3	0.165242	0.151988	0.392812	0.398061	0.395437	0.002015	Q0PCA0	Cj0025c	ND	1	1	ND	0.819641	0.9509	0.885271	0.225
Q9PJ85	Cj0026c	thyX Cj0026c	Thymidylate synthase ThyX (TS) (TSase) (EC 2.1.1.148)	16	16	16	16	1.05248	0.966921	1.15273	0.996963	1.04227	0.39058	Q9PJ85	Cj0026c	27	21	27	0.819417	0.973267	0.748527	0.84707	0.0824
Q9PJ84	Cj0027	pyrG Cj0027	CTP synthase (EC 6.3.4.2) (CTP synthetase) (UTP--ammonia ligase)	42	42	42	42	1.41884	1.40654	1.54839	1.46369	1.45937	0.0018587	Q9PJ84	Cj0027	51	45	51	1.32134	1.59452	1.0554	1.32375	0.106
Q0PC97	Cj0028	recJ Cj0028	Putative single-stranded-DNA-specific exonuclease (EC 3.1.-.-)	27	27	18	18	1.24942	1.08116	1.36718	1.18685	1.22115	0.0693	Q0PC97	Cj0028	19	21	19	1.18469	1.13434	1.02993	1.11632	0.0632
Q0PC96	Cj0029	ansA ansB Cj0029	Cytoplasmic L-asparaginase (EC 3.5.1.1)	10	10	12	12	1.62734	1.49917	1.20252	1.95144	1.57012	0.010634	Q0PC96	Cj0029	11	10	11	2.26836	2.74115	2.78956	2.59969	0.000762
Q0PC95	Cj0030	Cj0030	Putative uncharacterized protein (PD-(D/E)XK nuclease family protein)	5	5	4	4	1.11243	1.05259	1.05338	1.11607	1.08362	0.0345	Q0PC95	Cj0030	11	5	11	1.27885	1.51145	0.717317	1.16921	0.5125
Q0PC94	Cj0031	Cj0031	Putative type IIS restriction/modification enzyme	1	1	2	2	1.19327	1.27084	0.866263	1.91499	1.31134	ND	Q0PC94	Cj0031	ND	4	3	ND	1.11263	1.80833	1.46048	0.1738
Q0PC93	Cj0033	Cj0033	Putative integral membrane protein	7	7	9	9	2.03182	0.836614	1.29201	1.76604	1.48162	0.089258	Q0PC93	Cj0033	25	21	24	3.11833	1.4454	1.94344	2.16906	0.0779
Q0PC92	Cj0034c	Cj0034c	Putative periplasmic protein	16	16	16	16	0.649347	0.686683	0.684898	0.683868	0.676199	0.0064843	Q0PC92	Cj0034c	22	22	22	0.837563	0.98223	0.934156	0.917983	0.1261
Q0PC90	Cj0036	Cj0036	Putative uncharacterized protein (DUF2130 domain-containing protein)	36	36	34	34	1.12832	0.884739	1.17853	0.828362	1.00499	0.99527	Q0PC90	Cj0036	44	41	44	1.56811	0.944126	0.805749	1.10599	0.6747
Q0PC89	Cj0037c	Cj0037c	Putative cytochrome C	34	34	31	31	0.813121	0.0400872	0.572863	0.676772	0.525711	0.0677	Q0PC89	Cj0037c	34	31	33	0.191284	0.567931	0.625345	0.46152	0.0167
Q0PC88	Cj0038c	Cj0038c	Putative poly(A) polymerase family protein (EC 2.7.7.-)	1	1	1	1	0.843809	1.03814	0.779029	1.15559	0.954141	0.65667	Q0PC88	Cj0038c	ND	ND	ND	ND	ND	ND	ND	ND
Q0PC87	Cj0039c	typA Cj0039c	GTP-binding protein TypA homolog (50S ribosomal subunit assembly factor BipA)	59	59	59	59	1.33099	1.22195	1.36368	1.23285	1.28737	0.0016106	Q0PC87	Cj0039c	59	59	59	0.797178	1.27283	0.805259	0.958423	0.8045
Q0PC86	Cj0040	Cj0040	Putative uncharacterized protein (DUF2018 family protein)	11	11	11	11	1.57817	1.31146	1.92253	1.36347	1.54391	0.005558	Q0PC86	Cj0040	6	8	6	2.11109	1.76547	1.54432	1.80696	0.00814
Q0PC85	Cj0041	fliK Cj0041	Putative flagellar hook-length control protein	14	14	13	13	1.05515	1.03258	1.19977	1.09979	1.09682	0.082362	Q0PC85	Cj0041	7	7	ND	1.17529	1.51315	ND	1.34422	0.0717
Q0PC84	Cj0042	flgD Cj0042	Putative flagellar hook assembly protein (Basal-body rod modification protein FlgD)	10	10	11	11	1.1219	1.30432	1.18681	1.24156	1.21365	0.10528	Q0PC84	Cj0042	11	10	11	1.51267	3.48295	2.29728	2.43097	0.0369
Q0PC83	Cj0043	flgE Cj0043	Flagellar basal body protein FlgE	5	5	3	3	1.02656	1.14708	1.22335	1.14862	1.1364	0.24724	Q0PC83	Cj0043	3	3	3	3.54012	3.80528	1.90566	3.08369	0.0247
Q0PC82	Cj0044c	Cj0044c	Putative uncharacterized protein (FapA domain-containing protein)	15	15	9	9	0.796803	0.817673	0.684179	0.770103	0.767189	0.0061	Q0PC82	Cj0044c	45	41	44	1.10107	0.95934	1.20916	1.08986	0.282
Q0PC81	Cj0045c	fedA Cj0045c	Putative iron-binding protein	3	3	3	3	1.21702	1.11597	1.0988	1.90891	1.33518	0.3114	Q0PC81	Cj0045c	10	6	10	2.90312	1.94286	3.42426	2.75674	0.0155
Q9PJ66	Cj0053c	mnmA trmU Cj0053c	tRNA-specific 2-thiouridylase MnmA (EC 2.8.1.-)	34	34	33	33	0.872923	0.810312	0.803517	0.792402	0.819788	0.018791	Q9PJ66	Cj0053c	30	26	30	0.561467	0.508509	0.929307	0.666428	0.0653
Q0PC79	Cj0054c	Cj0054c	Putative lysine decarboxylase family protein (Cytokinin riboside 5'-monophosphate phosphoribohydrolase (EC 3.2.2.n1))	20	20	17	17	1.10544	1.16776	1.08276	1.12412	1.12002	0.0113	Q0PC79	Cj0054c	11	15	10	0.974568	1.26235	0.865714	1.03421	0.7868
Q0PC76	Cj0057	Cj0057	Putative periplasmic protein	ND	ND	4	4	ND	ND	2.51124	5.62854	4.06989	0.1877	Q0PC76	Cj0057	ND	3	4	ND	9.94321	4.912	7.4276	0.1271
Q0PC74	Cj0059c	fliY Cj0059c	Putative flagellar motor switch protein	10	10	10	10	1.25163	1.31446	1.39787	1.34632	1.32757	0.0079831	Q0PC74	Cj0059c	9	10	9	1.13037	1.21011	0.870459	1.07031	0.5306
Q0PC73	Cj0060c	fliM Cj0060c	Flagellar motor switch protein	18	18	16	16	0.959197	1.01049	1.11658	1.2034	1.07242	0.4265	Q0PC73	Cj0060c	20	18	19	1.19587	0.898003	0.907716	1.00053	0.9959
Q0PC72	Cj0061c	fliA Cj0061c	RNA polymerase sigma factor	14	14	10	10	1.45589	1.26135	1.42362	1.27445	1.35383	0.0058	Q0PC72	Cj0061c	7	7	7	0.711379	1.16682	0.700918	0.859706	0.4127
Q0PC71	Cj0062c	Cj0062c	Putative integral membrane protein	1	1	ND	ND	1.09523	0.818081	ND	ND	0.956657	ND	Q0PC71	Cj0062c	5	3	ND	1.1973	1.08415	ND	1.14073	0.1307
Q0PC70	Cj0063c	Cj0063c	Site-determining protein (ATP-binding protein)	27	27	26	26	1.45198	1.2199	1.39307	1.21471	1.31991	0.0071505	Q0PC70	Cj0063c	21	21	21	0.791583	0.826428	0.786011	0.801341	0.00051
O52908	Cj0064c	flhF Cj0064c	Flagellar biosynthesis protein FlhF (Flagella-associated GTP-binding protein)	37	37	31	31	1.12083	1.23322	1.1653	1.50328	1.25566	0.060726	O52908	Cj0064c	48	39	48	1.24881	1.01779	1.53204	1.26621	0.1479
Q9PJ53	Cj0066c	aroQ Cj0066c	3-dehydroquinate dehydratase (3-dehydroquinase) (EC 4.2.1.10) (Type II DHQase)	6	6	5	5	0.824825	0.907307	0.88438	0.943526	0.89001	0.041625	Q9PJ53	Cj0066c	8	5	8	0.907967	1.01231	0.785677	0.901986	0.2088
Q0PC66	Cj0067	Cj0067	Putative amidohydrolase family protein	10	9	12	11	0.677104	0.778855	0.726656	0.791339	0.743489	0.0028	Q0PC66	Cj0067	11	9	10	0.672319	0.671411	0.678654	0.674128	2.6e-06
Q0PC65	Cj0068	pspA Cj0068	Protease	13	13	9	9	0.707659	0.762741	0.757264	0.764914	0.748145	0.0079282	Q0PC65	Cj0068	17	13	17	0.944698	1.63506	1.03727	1.20568	0.3956
Q0PC64	Cj0069	Cj0069	Putative uncharacterized protein	42	42	39	39	0.890559	0.868999	1.06505	0.887985	0.928148	0.3555	Q0PC64	Cj0069	32	33	32	1.01378	0.971966	1.03726	1.00767	0.7085
Q0PC62	Cj0073c	lutC Cj0073c	Putative uncharacterized protein	33	33	29	29	0.262169	0.211855	0.824558	0.545257	0.46096	0.0319	Q0PC62	Cj0073c	31	29	31	0.549467	0.549541	0.494279	0.531096	2.7e-07
Q0PC61	Cj0074c	lutB Cj0074c	Putative iron-sulfur protein	39	39	39	39	0.553154	0.75301	0.641226	0.597954	0.636336	0.0048	Q0PC61	Cj0074c	50	50	50	0.643728	0.548694	0.612655	0.601692	9.4e-05
Q0PC60	Cj0075c	lutA Cj0075c	Putative oxidoreductase iron-sulfur subunit	29	29	29	29	0.749878	0.770077	0.559552	0.357133	0.60916	0.0271	Q0PC60	Cj0075c	21	24	21	0.912523	0.375957	0.27796	0.522146	0.0725
Q0PC59	Cj0076c	lctP Cj0076c	L-lactate permease	5	5	3	3	2.45702	1.74974	1.59611	1.44197	1.81121	0.021316	Q0PC59	Cj0076c	3	5	5	4.2921	1.61983	1.36329	2.42507	0.0454
Q0PC58	Cj0077c	cdtC Cj0077c	Cytolethal distending toxin C	9	9	11	11	1.45278	1.38569	1.49725	1.59235	1.48202	0.02547	Q0PC58	Cj0077c	4	4	4	2.71298	1.4365	1.43128	1.86025	0.0488
Q0PC57	Cj0078c	cdtB Cj0078c	Cytolethal distending toxin B	10	10	8	8	1.38962	1.30014	1.37186	2.27447	1.58402	ND	Q0PC57	Cj0078c	9	9	9	2.54725	1.6754	1.65201	1.95822	0.0313
Q0PC56	Cj0079c	cdtA Cj0079c	Cytolethal distending toxin subunit A (CDT A)	10	10	10	10	1.04691	0.943068	1.02856	1.02504	1.01089	0.64611	Q0PC56	Cj0079c	6	9	8	0.960487	0.756994	0.677152	0.798211	0.075
Q0PC54	Cj0081	cioA cydA Cj0081	Cytochrome bd oxidase subunit I (EC 1.10.3.-)	9	9	7	7	0.6765	0.654297	0.667563	0.593798	0.64804	0.0038702	Q0PC54	Cj0081	11	9	12	0.563214	0.549915	1.24388	0.785668	0.4025
Q0PC53	Cj0082	cioB cydB Cj0082	Cytochrome bd oxidase subunit II (EC 1.10.3.-)	2	2	3	3	3.49643	1.71014	1.38715	1.0496	1.91083	0.1935	Q0PC53	Cj0082	3	3	3	1.82665	2.25748	1.41915	1.83443	0.0482
Q0PC52	Cj0085c	Cj0085c	Putative amino acid racemase	21	21	18	18	0.995501	0.947829	0.922977	0.879711	0.936504	0.12412	Q0PC52	Cj0085c	11	11	11	1.11871	0.762075	0.636423	0.83907	0.3277
Q9PJ40	Cj0086c	ung Cj0086c	Uracil-DNA glycosylase (UDG) (EC 3.2.2.27)	22	22	18	18	1.28543	1.36264	1.86056	1.30331	1.45298	0.019682	Q9PJ40	Cj0086c	11	11	11	1.41657	1.65989	1.46875	1.51507	0.00223
Q0PC50	Cj0087	aspA Cj0087	Aspartate ammonia-lyase (EC 4.3.1.1)	34	34	33	33	0.990637	1.10646	1.0828	1.14377	1.08092	0.12604	Q0PC50	Cj0087	43	35	43	1.15046	0.965295	1.01465	1.04347	0.4762
Q0PC49	Cj0088	dcuA Cj0088	Anaerobic C4-dicarboxylate transporter	ND	ND	1	1	ND	ND	0.518715	0.749252	0.633984	ND	Q0PC49	Cj0088	ND	1	1	ND	0.760381	0.824133	0.792257	0.31
Q0PC48	Cj0089	Cj0089	Putative lipoprotein	27	27	25	25	1.11304	1.02633	0.771557	0.635942	0.886718	0.5323	Q0PC48	Cj0089	29	27	29	1.10601	0.779857	0.562109	0.815992	0.309
Q0PC47	Cj0090	Cj0090	Putative lipoprotein	3	3	2	2	0.648672	0.69723	0.997463	0.233223	0.644147	0.2058	Q0PC47	Cj0090	3	2	3	0.899974	1.10332	0.220947	0.741412	0.3873
Q0PC46	Cj0091	Cj0091	Putative lipoprotein	19	19	15	15	0.801507	0.587693	0.409238	0.385853	0.546073	0.0348	Q0PC46	Cj0091	19	19	19	0.519058	0.375044	0.820107	0.571403	0.0308
Q0PC45	Cj0092	Cj0092	Putative periplasmic protein	42	42	40	40	1.24762	1.34135	1.29798	1.54051	1.35686	0.0207	Q0PC45	Cj0092	32	32	32	1.88801	1.48097	1.48721	1.61873	0.0101
Q0PC44	Cj0093	Cj0093	Putative periplasmic protein	32	32	29	29	1.1183	1.28547	1.21758	1.13219	1.18839	0.0325	Q0PC44	Cj0093	38	34	38	1.28141	1.0686	0.99852	1.11618	0.2437
Q0PC43	Cj0094	rplU Cj0094	50S ribosomal protein L21	13	13	14	14	0.855633	0.983038	0.864361	0.946587	0.912405	0.14132	Q0PC43	Cj0094	21	13	21	0.848725	0.635062	0.523778	0.669189	0.0256
Q9PJ31	Cj0095	rpmA Cj0095	50S ribosomal protein L27	9	9	9	9	0.900307	0.927148	1.09419	0.944869	0.966629	0.69971	Q9PJ31	Cj0095	15	12	15	1.41159	0.497042	0.430208	0.779612	0.5247
Q0PC41	Cj0096	obg Cj0096	GTPase obg (GTP-binding protein obg)	17	17	13	13	1.09663	1.03116	1.24292	1.12203	1.12319	0.1371	Q0PC41	Cj0096	21	18	20	1.3837	0.850137	1.18283	1.13889	0.4225
Q9PJ29	Cj0097	proB Cj0097	Glutamate 5-kinase (EC 2.7.2.11) (Gamma-glutamyl kinase) (GK)	6	6	7	7	0.873422	0.866175	0.742884	0.889614	0.843024	0.5829	Q9PJ29	Cj0097	4	5	ND	0.845903	0.569512	ND	0.707707	0.0658
Q9PJ28	Cj0098	fmt Cj0098	Methionyl-tRNA formyltransferase (EC 2.1.2.9)	13	13	10	10	0.980277	0.870547	0.967135	0.864033	0.920498	0.09225	Q9PJ28	Cj0098	13	13	13	0.799433	0.974854	1.28706	1.02045	0.8929
Q0PC38	Cj0099	birA Cj0099	Putative biotin--[acetyl-CoA-carboxylase] synthetase (EC 6.3.4.15)	3	3	5	5	1.26598	1.51659	1.28848	1.77771	1.46219	0.0305	Q0PC38	Cj0099	5	3	ND	3.9314	1.42254	ND	2.67697	0.1708
Q0PC37	Cj0100	Cj0100	ParA family protein	11	11	10	10	1.05179	0.993929	1.00107	0.96827	1.00376	0.67988	Q0PC37	Cj0100	11	10	11	1.02649	1.44074	0.951747	1.13966	0.4104
Q9PJ25	Cj0101	parB Cj0101	Probable chromosome-partitioning protein ParB	33	33	30	30	1.14312	1.10968	1.15698	1.12143	1.1328	0.003029	Q9PJ25	Cj0101	26	30	25	0.824372	1.06109	0.966988	0.950817	0.5143
Q0PC35	Cj0102	atpF Cj0102	ATP synthase F0 sector B' subunit (EC 3.6.3.14)	10	10	9	9	0.648157	0.787961	0.628785	0.789093	0.713499	0.018768	Q0PC35	Cj0102	16	10	17	1.08718	1.6664	1.09962	1.2844	0.2108
Q0PC34	Cj0103	atpF Cj0103	ATP synthase subunit b (ATP synthase F(0) sector subunit b) (ATPase subunit I) (F-type ATPase subunit b)	10	10	9	9	0.737934	0.825297	0.72344	0.84619	0.783215	0.041826	Q0PC34	Cj0103	20	20	20	0.718044	0.852185	0.798256	0.789495	0.0057
Q0PC33	Cj0104	atpH Cj0104	ATP synthase subunit delta (ATP synthase F(1) sector subunit delta) (F-type ATPase subunit delta) (F-ATPase subunit delta)	23	23	23	23	0.903859	1.03467	0.934041	0.963157	0.958931	0.51733	Q0PC33	Cj0104	28	24	24	1.19512	0.736672	0.751716	0.894503	0.5216
Q9PJ21	Cj0105	atpA Cj0105	ATP synthase subunit alpha (EC 3.6.3.14) (ATP synthase F1 sector subunit alpha) (F-ATPase subunit alpha)	45	45	48	48	0.887872	1.00179	0.920288	1.01464	0.956146	0.4516	Q9PJ21	Cj0105	55	49	59	0.868845	0.862838	0.881154	0.870946	0.0308
Q9PJ20	Cj0106	atpG Cj0106	ATP synthase gamma chain (ATP synthase F1 sector gamma subunit) (F-ATPase gamma subunit)	24	24	25	25	0.647716	0.835955	0.670034	0.793071	0.736694	0.0188	Q9PJ20	Cj0106	26	25	25	0.897742	0.782397	0.911892	0.86401	0.0295
Q0PC30	Cj0107	atpD Cj0107	ATP synthase subunit beta (EC 3.6.3.14) (ATP synthase F1 sector subunit beta) (F-ATPase subunit beta)	39	39	37	37	0.913354	1.04936	0.936831	1.07597	0.99388	0.97173	Q0PC30	Cj0107	39	39	39	1.36399	0.796792	0.871745	1.01084	0.9543
Q9PJ18	Cj0108	atpC Cj0108	ATP synthase epsilon chain (ATP synthase F1 sector epsilon subunit) (F-ATPase epsilon subunit)	12	12	10	10	1.23483	1.1437	1.07511	1.2529	1.17664	0.0467	Q9PJ18	Cj0108	12	10	12	2.09483	0.821347	0.772621	1.2296	0.6239
Q0PC28	Cj0109	exbB3 Cj0109	Putative MotA/TolQ/ExbB proton channel family protein	3	3	3	3	0.810018	0.812589	0.726582	0.839674	0.797216	0.053	Q0PC28	Cj0109	8	5	8	0.935746	0.940739	0.588051	0.821512	0.201
Q0PC27	Cj0110	exbD3 Cj0110	Putative exbD/tolR family transport protein	8	8	4	4	0.803288	0.975533	0.686394	0.795537	0.815188	0.1082	Q0PC27	Cj0110	8	8	9	1.3767	1.05505	0.83619	1.08931	0.5998
Q0PC26	Cj0111	Cj0111	Putative periplasmic protein	10	10	9	9	1.62019	1.41924	1.28453	1.15299	1.36924	0.060818	Q0PC26	Cj0111	21	9	22	1.45606	1.45969	1.42934	1.44836	9.4e-05
Q9PJ14	Cj0112	tolB Cj0112	Protein TolB (Tol-Pal system protein)	32	32	31	31	0.872251	0.890462	0.892115	0.883793	0.884656	0.0014885	Q9PJ14	Cj0112	32	31	31	0.836875	0.827275	0.856136	0.840095	0.0014
Q0PC24	Cj0113	pal cjaD Cj0113	Peptidoglycan associated lipoprotein (Omp18)	12	12	8	8	0.591777	0.651582	0.502207	0.62771	0.593319	0.001254	Q0PC24	Cj0113	12	12	18	0.790931	0.590185	0.609592	0.663569	0.0062
Q0PC23	Cj0114	Cj0114	Putative periplasmic protein	28	28	27	27	0.91984	1.17371	0.912362	1.12212	1.03201	0.65848	Q0PC23	Cj0114	28	35	38	2.58748	2.73395	3.18471	2.83538	0.00031
Q0PC22	Cj0115	slyD Cj0115	Peptidyl-prolyl cis-trans isomerase (EC 5.2.1.8)	17	17	15	15	0.872713	1.19708	0.916951	1.1395	1.03156	0.64848	Q0PC22	Cj0115	12	17	11	1.1309	0.98627	1.00679	1.04132	0.4122
Q0PC21	Cj0116	fabD Cj0116	Malonyl CoA-acyl carrier protein transacylase (EC 2.3.1.39)	28	28	25	25	1.20222	1.09324	1.12628	1.11132	1.13326	0.013456	Q0PC21	Cj0116	16	17	16	1.05563	0.881467	1.14077	1.02596	0.7509
Q0PC20	Cj0117	pfs Cj0117	5'-methylthioadenosine/S-adenosylhomocysteine nucleosidase (EC 3.2.2.16)	24	24	22	22	1.14266	1.2108	1.23632	1.15287	1.18566	0.0034443	Q0PC20	Cj0117	14	22	24	1.17569	0.888241	0.973269	1.0124	0.8914
Q0PC19	Cj0118	Cj0118	Putative uncharacterized protein	19	19	16	16	0.935056	0.937123	1.10994	1.09237	1.01862	0.54192	Q0PC19	Cj0118	19	19	19	1.36469	0.884007	1.2577	1.1688	0.3111
Q0PC18	Cj0119	Cj0119	Putative hydrolase	8	8	7	7	1.12029	1.12292	1.1298	1.09858	1.1179	0.019148	Q0PC18	Cj0119	7	7	7	1.23971	1.13888	1.49292	1.2905	0.0509
Q0PC17	Cj0120	Cj0120	Putative uncharacterized protein (DNA recombination / repair protein RecO)	4	4	3	3	1.26431	1.09937	1.37081	1.33868	1.26829	0.0418	Q0PC17	Cj0120	ND	ND	ND	ND	ND	ND	ND	ND
Q9PJ06	Cj0121	ybeY Cj0121	Endoribonuclease YbeY (EC 3.1.-.-)	4	4	2	2	1.50177	1.59905	1.1534	1.25399	1.37705	0.041826	Q9PJ06	Cj0121	ND	ND	ND	ND	ND	ND	ND	ND
Q0PC15	Cj0122	Cj0122	Putative uncharacterized protein	1	1	1	1	1.20843	1.26882	1.12148	1.29437	1.22328	ND	Q0PC15	Cj0122	ND	ND	ND	ND	ND	ND	ND	ND
Q0PC14	Cj0123c	Cj0123c	tRNA-dihydrouridine synthase (EC 1.-.-.-)	9	9	13	13	2.26703	1.18128	1.2707	0.920133	1.40978	0.2593	Q0PC14	Cj0123c	15	13	13	2.2838	1.9402	1.63903	1.95434	0.0069
Q0PC13	Cj0124c	Cj0124c	Putative membrane protein	17	17	15	15	0.855769	0.840752	0.861641	0.879746	0.859477	0.021707	Q0PC13	Cj0124c	17	17	17	1.02608	0.997471	0.993141	1.00557	0.6188
Q0PC12	Cj0125c	Cj0125c	Putative uncharacterized protein (Dks C4-type domain-containing protein)	13	13	11	11	0.901698	1.09953	0.957558	0.939639	0.974606	0.80661	Q0PC12	Cj0125c	ND	11	7	ND	1.40391	0.679127	1.04152	0.8876
Q9PJ01	Cj0126c	rlmH Cj0126c	Ribosomal RNA large subunit methyltransferase H (EC 2.1.1.177) (23S rRNA (pseudouridine1915-N3)-methyltransferase) (23S rRNA m3Psi1915 methyltransferase) (rRNA (pseudouridine-N3-)-methyltransferase RlmH)	7	7	8	8	0.973582	0.928649	1.00966	0.995668	0.97689	0.7636	Q9PJ01	Cj0126c	9	8	9	1.56124	0.628288	0.893751	1.02776	0.9251
Q0PC10	Cj0127c	accD Cj0127c	Acetyl-coenzyme A carboxylase carboxyl transferase subunit beta (ACCase subunit beta) (Acetyl-CoA carboxylase carboxyltransferase subunit beta) (EC 6.4.1.2)	23	23	19	19	0.870418	0.944055	0.886678	0.954999	0.914037	0.067469	Q0PC10	Cj0127c	20	19	20	0.962763	0.861145	0.963768	0.929225	0.1061
Q0PC09	Cj0128c	Cj0128c	Putative inositol monophosphatase family protein	11	11	8	8	0.942649	0.889059	0.973278	0.898648	0.925909	0.27645	Q0PC09	Cj0128c	ND	4	4	ND	1.72737	2.5262	2.12679	0.0323
Q0PC08	Cj0129c	bamA Cj0129c	Outer membrane protein assembly factor BamA	35	35	38	38	0.890325	0.912666	0.921078	0.962759	0.921707	0.0261	Q0PC08	Cj0129c	61	46	61	1.02268	1.12279	1.00223	1.04923	0.2568
Q0PC07	Cj0130	tyrA Cj0130	Putative prephenate dehydrogenase (EC 1.3.1.12)	15	15	14	14	1.89909	1.26539	1.3146	1.25187	1.43274	0.0694	Q0PC07	Cj0130	8	11	9	2.70062	1.315	1.85636	1.95733	0.01794
Q0PC06	Cj0131	Cj0131	Putative peptidase M23 family protein	32	32	31	31	0.649438	0.703269	0.656144	0.744202	0.688263	0.0089024	Q0PC06	Cj0131	31	31	47	0.989161	0.944973	0.974652	0.969595	0.0795
Q9PIZ5	Cj0132	lpxC Cj0132	UDP-3-O-[3-hydroxymyristoyl] N-acetylglucosamine deacetylase (EC 3.5.1.-) (UDP-3-O-acyl-GlcNAc deacetylase)	26	26	26	26	1.58998	1.3472	1.53077	1.24318	1.42778	0.0238	Q9PIZ5	Cj0132	14	14	14	0.675758	0.991544	0.766033	0.811112	0.1146
Q0PC04	Cj0133	Cj0133	Putative glycoprotease family protein	7	7	6	6	1.0704	1.31116	1.2229	1.29838	1.22571	0.0541	Q0PC04	Cj0133	ND	ND	ND	ND	ND	ND	ND	ND
Q9PIZ3	Cj0134	thrB Cj0134	Homoserine kinase (HK) (HSK) (EC 2.7.1.39)	16	16	14	14	0.768161	0.7752	0.654259	0.693086	0.722677	0.003395	Q9PIZ3	Cj0134	9	13	9	0.42161	0.611353	0.70371	0.578891	0.0071
Q0PC02	Cj0135	Cj0135	Putative uncharacterized protein (YlxR domain-containing protein)	3	3	2	2	1.11384	1.0506	1.86753	1.38603	1.3545	0.1525	Q0PC02	Cj0135	7	5	2	3.5662	1.68119	1.18321	2.14353	0.0339
Q9PIZ1	Cj0136	infB Cj0136	Translation initiation factor IF-2	73	73	66	66	1.17621	0.962417	1.23934	0.956885	1.08371	0.486	Q9PIZ1	Cj0136	73	77	89	1.05892	1.05473	0.84929	0.987646	0.867
Q9PIZ0	Cj0137	rbfA Cj0137	Ribosome-binding factor A	11	11	10	10	1.10134	1.29871	1.37209	1.12794	1.22502	0.10886	Q9PIZ0	Cj0137	12	11	12	1.74288	0.94836	1.56763	1.41962	0.1566
Q9PIY9	Cj0138	rimP Cj0138	Ribosome maturation factor RimP	10	10	9	9	0.925616	0.774835	0.791541	0.603389	0.773845	0.37752	Q9PIY9	Cj0138	7	10	9	0.976906	0.693488	0.64704	0.772478	0.0919
Q0PBZ8	Cj0139	Cj0139	Putative endonuclease	50	50	47	47	0.837568	0.960422	0.906111	0.978714	0.920704	0.1708	Q0PBZ8	Cj0139	50	50	47	0.718853	1.14481	0.827607	0.897089	0.4657
Q0PBZ7	Cj0140	Cj0140	Putative uncharacterized protein (Restriction endonuclease-like protein)	19	19	16	16	0.870165	1.01789	0.928381	0.898757	0.928797	0.212	Q0PBZ7	Cj0140	21	21	21	0.959104	1.03473	1.12941	1.04108	0.4513
Q0PBZ5	Cj0142c	Cj0142c	Putative ABC transporter ATP-binding protein	5	5	5	5	0.880496	0.859952	1.14186	1.55696	1.10982	0.6792	Q0PBZ5	Cj0142c	16	11	14	1.81987	1.00933	1.66908	1.49942	0.1152
Q0PBZ4	Cj0143c	znuA Cj0143c	Putative periplasmic solute binding protein for ABC transport system	19	19	17	17	0.849188	0.533156	0.43096	0.777645	0.647737	0.0766	Q0PBZ4	Cj0143c	17	17	17	0.842905	0.469946	0.555838	0.622896	0.0287
Q0PBZ3	Cj0144	tlp2 Cj0144	Putative methyl-accepting chemotaxis signal transduction protein	48	21	45	18	0.863084	0.862706	0.859125	0.888815	0.868432	0.093731	Q0PBZ3	Cj0144	67	48	30	0.821158	0.938199	1.12685	0.962069	0.6921
Q0PBZ2	Cj0145	Cj0145	Putative TAT (Twin-Arginine Translocation) pathway signal sequence domain protein	2	2	4	4	0.986147	0.993054	0.894011	0.740921	0.903533	0.3349	Q0PBZ2	Cj0145	ND	ND	ND	ND	ND	ND	ND	ND
Q0PBZ1	Cj0146c	trxB Cj0146c	Thioredoxin reductase (EC 1.8.1.9)	40	40	38	38	1.3565	1.14664	1.34431	1.10763	1.23877	0.0705	Q0PBZ1	Cj0146c	39	40	39	1.26153	1.08299	1.23026	1.19159	0.253
Q0PBZ0	Cj0147c	trxA Cj0147c	Thioredoxin	12	12	11	11	0.918561	0.784205	0.922419	0.7668	0.847996	0.0734	Q0PBZ0	Cj0147c	9	10	9	0.981948	1.01949	0.758002	0.919812	0.3815
Q9PIX9	Cj0148c	Cj0148c	UPF0102 protein Cj0148c	2	2	1	1	1.5977	1.16224	1.62657	1.10974	1.37406	0.0731	Q9PIX9	Cj0148c	1	ND	ND	0.881467	ND	ND	0.881467	ND
Q0PBY8	Cj0149c	hom Cj0149c	Homoserine dehydrogenase (EC 1.1.1.3)	27	27	24	24	0.95805	1.03262	0.962317	1.02794	0.995232	0.82138	Q0PBY8	Cj0149c	22	22	24	0.895861	0.855171	ND	0.875516	0.0257
Q0PBY7	Cj0150c	Cj0150c	Aminotransferase (EC 2.6.1.1)	36	36	33	33	0.980444	1.04183	1.0172	1.03613	1.0189	0.4147	Q0PBY7	Cj0150c	34	33	33	0.884238	0.713399	0.930578	0.842738	0.0759
Q0PBY6	Cj0151c	Cj0151c	Putative periplasmic protein	10	10	9	9	1.39695	1.49593	1.48354	1.47178	1.46205	0.002221	Q0PBY6	Cj0151c	11	10	11	1.1909	0.974405	1.43367	1.19966	0.2067
Q0PBY5	Cj0152c	Cj0152c	Putative membrane protein	11	11	10	10	0.8436	0.822448	0.906332	0.907541	0.86998	0.0164	Q0PBY5	Cj0152c	12	12	20	0.980435	0.850137	0.735137	0.855236	0.1106
Q0PBY4	Cj0153c	Cj0153c	Putative rRNA methylase	3	3	3	3	0.676072	0.694557	0.543913	0.702233	0.654194	0.0034	Q0PBY4	Cj0153c	ND	3	5	ND	0.581717	0.728617	0.655167	0.0081
Q0PBY3	Cj0154c	rsmI Cj0154c	Ribosomal RNA small subunit methyltransferase I (EC 2.1.1.198) (16S rRNA 2'-O-ribose C1402 methyltransferase) (rRNA (cytidine-2'-O-)-methyltransferase RsmI)	4	4	4	4	0.836014	0.919954	0.918822	0.949598	0.906097	0.080932	Q0PBY3	Cj0154c	3	2	3	0.366496	0.94582	1.42143	0.91125	0.7855
Q9PIX2	Cj0155c	rpmE Cj0155c	50S ribosomal protein L31	7	7	7	7	0.582525	0.604142	0.688576	0.673147	0.637098	0.018833	Q9PIX2	Cj0155c	7	6	9	0.615646	0.549541	0.509703	0.558297	0.0001
Q0PBY1	Cj0156c	Cj0156c	Ribosomal RNA small subunit methyltransferase E (EC 2.1.1.193)	9	9	7	7	0.971538	0.919239	1.02964	0.952282	0.968174	0.11041	Q0PBY1	Cj0156c	7	7	7	1.15892	1.11178	1.35378	1.20816	0.0483
Q0PBX9	Cj0158c	Cj0158c	Putative haem-binding lipoprotein	2	2	2	2	1.41743	1.50823	1.17756	1.19543	1.32467	0.0287	Q0PBX9	Cj0158c	4	3	4	0.795934	1.44371	0.723061	0.987568	0.9593
Q0PBX8	Cj0159c	Cj0159c	Putative 6-pyruvoyl tetrahydropterin synthase (EC 4.2.3.12) 6-carboxy-5,6,7,8-tetrahydropterin synthase (EC 4.1.2.50) (Queuosine biosynthesis protein QueD)	12	12	10	10	1.06942	1.20987	1.17653	1.23627	1.17302	0.038131	Q0PBX8	Cj0159c	8	6	6	1.49611	0.999165	1.08695	1.19407	0.2738
Q0PBX7	Cj0160c	queE Cj0160c	7-carboxy-7-deazaguanine synthase (CDG synthase) (EC 4.3.99.3) (Queuosine biosynthesis protein QueE)	8	8	7	7	1.28385	1.06655	1.27637	1.23262	1.21485	0.0476	Q0PBX7	Cj0160c	4	4	4	1.61868	1.46234	1.68381	1.58828	0.0009
Q9PIW6	Cj0161c	moaA Cj0161c	GTP 3',8-cyclase (EC 4.1.99.22) Cyclic pyranopterin monophosphate synthase (EC 4.1.99.18) (Molybdenum cofactor biosynthesis protein A)	28	28	26	26	1.37061	1.22046	1.13755	1.10353	1.20804	0.0801	Q9PIW6	Cj0161c	21	21	21	1.30709	0.997471	0.893678	1.06608	0.6228
Q0PBX5	Cj0162c	Cj0162c	Putative periplasmic protein	8	8	9	9	1.15974	1.60944	1.38237	2.14105	1.57315	0.0245	Q0PBX5	Cj0162c	10	9	10	1.99634	1.45052	1.16259	1.53648	0.0932
Q0PBX4	Cj0163c	Cj0163c	Flagellar motor switch protein	9	9	9	9	0.843129	0.901713	0.800057	0.859188	0.851022	0.0091	Q0PBX4	Cj0163c	4	ND	ND	0.806805	ND	ND	0.806805	ND
Q0PBX3	Cj0164c	ubiA Cj0164c	Putative 4-hydroxybenzoate octaprenyltransferase (EC 2.5.1.-)	2	2	2	2	0.457413	0.755327	0.796657	1.27738	0.821695	0.29043	Q0PBX3	Cj0164c	4	2	2	1.14293	0.884007	0.653736	0.893557	0.4932
Q9PIW2	Cj0166	miaA Cj0166	tRNA dimethylallyltransferase (EC 2.5.1.75) (Dimethylallyl diphosphate:tRNA dimethylallyltransferase) (DMAPP:tRNA dimethylallyltransferase) (DMATase) (Isopentenyl-diphosphate:tRNA isopentenyltransferase) (IPP transferase) (IPPT) (IPTase)	8	8	8	8	1.02331	1.06149	1.06489	1.05527	1.05124	0.0232	Q9PIW2	Cj0166	4	2	ND	3.05423	1.90605	ND	2.48014	0.0407
Q0PBX0	Cj0168c	Cj0168c	Putative periplasmic protein	2	2	2	2	0.255394	0.349057	0.501863	0.491421	0.399434	0.002156	Q0PBX0	Cj0168c	ND	2	4	ND	0.722278	0.71594	0.719109	0.0158
Q0PBW9	Cj0169	sodB Cj0169	Superoxide dismutase [Fe] (EC 1.15.1.1)	14	14	14	14	0.851379	1.08171	1.01605	1.05417	1.00083	0.88329	Q0PBW9	Cj0169	14	14	12	1.04543	0.866225	0.893371	0.935009	0.3086
Q0PBW8	Cj0170	Cj0170	Putative uncharacterized protein (Class I SAM-dependent methyltransferase)	3	3	2	2	1.38066	2.33734	2.82636	1.57375	2.02953	0.0454	Q0PBW8	Cj0170	5	3	5	5.30475	5.91474	1.6046	4.2747	0.01356
Q0PBW7	Cj0172c	Cj0172c	Putative saccharopine dehydrogenase (EC 1.5.1.7)	33	33	33	33	1.18079	1.08483	1.17704	1.05374	1.1241	0.0625	Q0PBW7	Cj0172c	31	33	24	1.16524	1.13797	1.07114	1.12478	0.1111
Q0PBW6	Cj0173c	cfbpC Cj0173c	Putative iron-uptake ABC transport system ATP-binding protein	3	3	4	4	1.20061	1.67443	1.63608	2.9609	1.86801	0.0451764	Q0PBW6	Cj0173c	8	8	8	2.30287	2.59609	2.13042	2.34313	0.00466
Q0PBW4	Cj0175c	cfbpA Cj0175c	Putative iron-uptake ABC transport system,periplasmic iron-binding protein	32	32	31	31	1.75919	1.81444	1.78306	2.15034	1.87676	0.0038927	Q0PBW4	Cj0175c	50	50	50	2.49067	3.07407	2.16304	2.57592	0.0195
Q0PBW2	Cj0177	Cj0177	Putative iron transport protein	1	1	6	6	1.12235	1.33053	2.10788	3.58308	2.03596	0.0365848	Q0PBW2	Cj0177	ND	5	6	ND	2.88234	3.00084	2.94159	0.009
Q0PBW1	Cj0178	Cj0178	Putative TonB-dependent outer membrane receptor	ND	ND	17	17	ND	ND	2.03142	5.38558	3.7085	0.2477	Q0PBW1	Cj0178	ND	17	17	ND	2.90012	5.16029	4.0302	0.04915
Q0PBW0	Cj0179	Cj0179	Biopolymer transport protein	ND	ND	4	4	ND	ND	2.06791	3.59065	2.82928	0.1382	Q0PBW0	Cj0179	ND	4	4	ND	3.13975	4.11156	3.62565	0.0326
Q0PBV7	Cj0182	Cj0182	Putative transmembrane transport protein	3	3	3	3	3.27679	2.31935	1.19383	1.17551	1.99137	0.1445	Q0PBV7	Cj0182	8	3	3	2.90554	2.99574	1.7477	2.54966	0.0411
Q0PBV6	Cj0183	Cj0183	Putative integral membrane protein with haemolysin domain	12	12	10	10	1.69304	1.69023	1.28506	1.11248	1.4452	0.1129	Q0PBV6	Cj0183	20	12	20	1.44605	2.9548	1.73388	2.04491	0.0467
Q0PBV5	Cj0184c	Cj0184c	Putative serine/threonine protein phosphatase	4	4	3	3	1.00854	0.970604	0.91096	1.09035	0.995112	0.93386	Q0PBV5	Cj0184c	5	3	ND	0.997471	1.51884	ND	1.25816	0.4264
Q0PBV4	Cj0185c	Cj0185c	Putative phnA domain protein	9	9	10	10	0.683867	0.655737	0.965952	0.760671	0.766557	0.0905	Q0PBV4	Cj0185c	6	4	6	1.47209	1.1211	0.512466	1.03522	0.9061
Q0PBV2	Cj0187c	purN Cj0187c	Phosphoribosylglycinamide formyltransferase (EC 2.1.2.2)	16	16	14	14	1.26061	1.48344	1.38237	2.0059	1.53308	ND	Q0PBV2	Cj0187c	14	11	10	1.75036	1.31411	2.27749	1.78065	0.0487
Q0PBV1	Cj0188c	Cj0188c	Putative kinase (Bifunctional NAD(P)H-hydrate repair enzyme (Nicotinamide nucleotide repair protein) [Includes: ADP-dependent (S)-NAD(P)H-hydrate dehydratase (EC 4.2.1.136))	18	18	18	18	0.893989	1.15056	1.26334	1.27394	1.14546	0.334	Q0PBV1	Cj0188c	19	18	18	1.50731	1.26589	1.64041	1.4712	0.0127
Q0PBV0	Cj0189c	Cj0189c	Putative uncharacterized protein	8	8	7	7	1.05056	0.989986	0.954305	0.991947	0.996699	0.73799	Q0PBV0	Cj0189c	7	7	7	0.851904	1.12025	1.17458	1.04891	0.6496
Q0PBU9	Cj0190c	Cj0190c	Putative uncharacterized protein	13	13	11	11	1.11824	1.1554	1.61697	1.31631	1.30173	0.1511	Q0PBU9	Cj0190c	12	13	12	2.47717	2.92129	1.1276	2.17535	0.0948
Q9PIT8	Cj0191c	def Cj0191c	Peptide deformylase (PDF) (EC 3.5.1.88) (Polypeptide deformylase)	5	5	5	5	1.0928	0.983063	1.00583	1.05284	1.03363	0.35649	Q9PIT8	Cj0191c	5	4	ND	1.18122	1.19153	ND	1.18637	0.008
P54413	Cj0192c	clpP Cj0192c	ATP-dependent Clp protease proteolytic subunit (EC 3.4.21.92) (Endopeptidase Clp)	15	15	15	15	1.13832	1.07192	1.05431	0.979059	1.0609	0.2826	P54413	Cj0192c	16	16	16	0.981703	0.854371	0.771337	0.869137	0.0992
Q46108	Cj0193c	tig Cj0193c	Trigger factor (TF) (EC 5.2.1.8) (PPIase)	107	107	106	105	1.1106	1.01258	1.15717	1.03913	1.07987	0.1824	Q46108	Cj0193c	95	103	95	1.29141	0.924483	0.861991	1.02596	0.8558
P51594	Cj0194	folE Cj0194	GTP cyclohydrolase 1 (EC 3.5.4.16) (GTP cyclohydrolase I) (GTP-CH-I)	19	19	18	18	0.330459	0.907512	0.648177	0.794965	0.670278	0.1537	P51594	Cj0194	16	16	16	0.627728	0.628288	0.651578	0.635865	2.6e-06
Q0PBU4	Cj0195	fliI Cj0195	Flagellum-specific ATP synthase (EC 3.6.3.14)	34	34	34	34	1.36703	1.21656	1.32162	1.22334	1.28214	0.013221	Q0PBU4	Cj0195	22	22	22	1.54337	1.50176	1.20069	1.41527	0.0184
Q0PBU3	Cj0196c	purF Cj0196c	Amidophosphoribosyltransferase (ATase) (EC 2.4.2.14) (Glutamine phosphoribosylpyrophosphate amidotransferase)	36	36	33	33	1.06874	1.15483	1.12238	1.1976	1.13589	0.029	Q0PBU3	Cj0196c	27	31	29	1.21522	1.0432	1.00545	1.08795	0.2447
Q9PIT2	Cj0197c	dapB Cj0197c	4-hydroxy-tetrahydrodipicolinate reductase (HTPA reductase) (EC 1.17.1.8)	16	16	14	14	1.01553	0.872991	0.836549	0.861408	0.896619	0.086836	Q9PIT2	Cj0197c	16	14	20	1.2624	0.801872	0.907635	0.990636	0.9496
Q0PBU1	Cj0198c	Cj0198c	Helicase-like protein (Replication-associated recombination protein A)	1	1	1	1	0.747946	0.686379	0.726293	0.883956	0.761143	0.25348	Q0PBU1	Cj0198c	ND	3	ND	ND	1.0669	ND	1.0669	ND
Q0PBU0	Cj0199c	Cj0199c	Putative periplasmic protein	3	3	3	3	1.90898	1.81649	1.51097	1.54969	1.69653	0.030004	Q0PBU0	Cj0199c	3	3	3	1.90876	1.50552	1.67431	1.6962	0.01921
Q0PBT9	Cj0200c	Cj0200c	Putative periplasmic protein	7	7	3	3	1.337	1.18694	1.07097	1.82149	1.3541	0.2258	Q0PBT9	Cj0200c	3	4	3	1.60128	1.51653	2.21625	1.77802	0.00243
Q0PBT8	Cj0201c	Cj0201c	Putative integral membrane protein	1	1	ND	ND	0.62917	0.669614	ND	ND	0.649392	ND	Q0PBT8	Cj0201c	ND	ND	ND	ND	ND	ND	ND	ND
Q0PBT6	Cj0203	Cj0203	Putative citrate transporter	1	1	ND	ND	1.07392	0.898908	ND	ND	0.986416	ND	Q0PBT6	Cj0203	ND	3	3	ND	0.74514	1.21725	0.981194	0.9216
Q0PBT5	Cj0204	Cj0204	Putative oligopeptide transporter, OPT family	4	4	3	3	3.94637	1.92301	0.913182	2.16996	2.23813	0.0455872	Q0PBT5	Cj0204	9	9	9	6.67555	7.65143	2.54448	5.62382	0.01954
Q9PIS3	Cj0206	thrS Cj0206	Threonine--tRNA ligase (EC 6.1.1.3) (Threonyl-tRNA synthetase) (ThrRS)	63	63	62	62	1.1424	1.05226	1.17043	1.13986	1.12624	0.01362	Q9PIS3	Cj0206	63	62	65	1.07596	0.925498	0.913207	0.971554	0.6156
Q9PIS2	Cj0207	infC Cj0207	Translation initiation factor IF-3	23	23	18	18	1.11614	0.854451	1.10728	0.981823	1.01492	0.8796	Q9PIS2	Cj0207	25	25	25	0.821229	0.933118	0.786482	0.846943	0.0258
Q0PBT1	Cj0208	Cj0208	Putative DNA modification methylase (Adenine-specific methyltransferase) (EC 2.1.1.72)	6	6	3	3	0.820733	0.861409	0.831304	0.88337	0.849204	0.0021	Q0PBT1	Cj0208	6	5	6	1.06786	0.858604	1.80668	1.24438	0.4433
Q9PIS0	Cj0224	argC Cj0224	N-acetyl-gamma-glutamyl-phosphate reductase (AGPR) (EC 1.2.1.38) (N-acetyl-glutamate semialdehyde dehydrogenase) (NAGSA dehydrogenase)	16	16	17	17	1.04343	1.04334	0.930811	1.05666	1.01856	0.4974	Q9PIS0	Cj0224	14	14	14	1.60677	0.98477	0.99889	1.19681	0.3914
Q0PBS9	Cj0225	Cj0225	Putative acetyltransferase (EC 2.3.-.-)	10	10	7	7	1.22448	1.19672	1.3285	2.00239	1.43802	0.1996	Q0PBS9	Cj0225	7	5	ND	1.31585	2.35501	ND	1.83543	0.1199
Q9PIR8	Cj0226	argB Cj0226	Acetylglutamate kinase (EC 2.7.2.8) (N-acetyl-L-glutamate 5-phosphotransferase) (NAG kinase) (AGK)	14	14	15	15	0.938915	0.863192	0.913677	0.90891	0.906174	0.014203	Q9PIR8	Cj0226	14	13	13	1.15214	0.859451	0.827146	0.946246	0.6305
Q9PIR7	Cj0227	argD Cj0227	Acetylornithine aminotransferase (ACOAT) (EC 2.6.1.11)	15	15	13	13	0.957651	0.909738	0.91902	0.886242	0.918163	0.0214	Q9PIR7	Cj0227	17	17	19	0.870255	1.00001	0.823067	0.897778	0.1255
Q0PBS6	Cj0228c	pcm Cj0228c	Protein-L-isoaspartate O-methyltransferase (EC 2.1.1.77)	19	19	19	19	1.12565	1.19491	1.08609	1.13578	1.13561	0.087782	Q0PBS6	Cj0228c	16	19	15	1.97834	1.06267	1.14914	1.39672	0.2457
Q0PBS5	Cj0229	Cj0229	Putative acetyltransferase	8	8	8	8	0.852186	0.792375	0.871613	0.890106	0.85157	0.0095	Q0PBS5	Cj0229	ND	8	7	ND	1.50552	0.359961	0.932741	0.8848
Q0PBS4	Cj0230c	Cj0230c	Nicotinate phosphoribosyltransferase (EC 2.4.2.11)	33	33	34	34	1.19549	1.11729	1.16612	1.10711	1.1465	0.017307	Q0PBS4	Cj0230c	23	23	23	1.50423	0.940739	0.745774	1.06358	0.7936
Q0PBS3	Cj0231c	nrdB Cj0231c	Ribonucleoside-diphosphate reductase subunit beta (EC 1.17.4.1)	39	39	35	35	0.723808	0.364127	0.971424	0.564695	0.656013	0.1485	Q0PBS3	Cj0231c	25	25	31	0.754466	0.817897	0.433235	0.668533	0.0496
Q9PIR1	Cj0233c	pyrE Cj0233c	Orotate phosphoribosyltransferase (OPRT) (OPRTase) (EC 2.4.2.10)	22	22	21	21	1.10513	1.12323	1.06118	0.827164	1.02917	0.7908	Q9PIR1	Cj0233c	17	21	17	0.672812	0.670626	0.977452	0.77363	0.0905
Q9PIR0	Cj0234c	frr Cj0234c	Ribosome-recycling factor (RRF) (Ribosome-releasing factor)	28	28	26	26	1.22208	1.1835	1.24159	1.19038	1.20939	0.00058155	Q9PIR0	Cj0234c	28	28	27	1.37611	1.29689	0.974404	1.2158	0.1538
Q0PBR9	Cj0235c	secG Cj0235c	Putative uncharacterized protein secG	1	1	1	1	1.01512	1.42521	0.929617	1.20353	1.14337	0.18864	Q0PBR9	Cj0235c	ND	ND	ND	ND	ND	ND	ND	ND
Q9PIQ8	Cj0236c	Cj0236c	Uncharacterized protein Cj0236c	2	2	2	2	0.812954	0.782076	0.735968	0.778959	0.777489	0.020317	Q9PIQ8	Cj0236c	ND	ND	ND	ND	ND	ND	ND	ND
Q0PBR7	Cj0237	canB cynT Cj0237	Carbonic anhydrase (EC 4.2.1.1)	11	11	11	11	1.20718	1.14368	1.09348	1.16788	1.15306	0.030002	Q0PBR7	Cj0237	6	8	11	1.07867	0.849411	1.27351	1.0672	0.6127
Q0PBR6	Cj0238	Cj0238	Putative mechanosensitive ion channel family protein	14	14	10	10	0.855644	0.743855	0.691207	0.702809	0.748379	0.0119	Q0PBR6	Cj0238	14	14	24	1.27182	0.909409	1.21192	1.13105	0.3075
Q0PBR5	Cj0239c	Cj0239c	Nitrogen fixation protein NifU	40	40	36	36	0.61734	0.682465	0.682489	0.694655	0.669237	0.0026767	Q0PBR5	Cj0239c	35	35	35	0.283598	0.767155	0.703032	0.584595	0.0419
Q0PBR4	Cj0240c	iscS Cj0240c	Cysteine desulfurase (NifS protein homolog) (EC 2.8.1.7)	31	31	27	27	0.799029	0.584812	0.718556	0.570566	0.668241	0.0157	Q0PBR4	Cj0240c	27	27	27	0.682049	0.679093	0.489184	0.616775	0.0039
Q9PIQ1	Cj0244	rpmI Cj0244	50S ribosomal protein L35	3	3	3	3	0.663319	0.687854	0.759493	0.567803	0.669617	0.0051	Q9PIQ1	Cj0244	6	4	3	0.669617	0.37511	0.194565	0.413097	0.0133
Q9PIQ0	Cj0245	rplT Cj0245	50S ribosomal protein L20	18	18	16	16	0.859242	1.0868	0.881193	1.02504	0.963068	0.60141	Q9PIQ0	Cj0245	18	18	20	1.03153	0.795945	0.676926	0.8348	0.188
Q0PBQ7	Cj0248	Cj0248	Putative uncharacterized protein HDOD domain-containing protein)	15	15	16	16	0.996487	1.03669	1.05294	0.949727	1.00896	0.43455	Q0PBQ7	Cj0248	14	14	14	1.17188	0.970375	1.03439	1.05888	0.378
Q0PBQ6	Cj0249	Cj0249	Cysteine permease	1	1	ND	ND	0.745394	0.88811	ND	ND	0.816752	ND	Q0PBQ6	Cj0249	ND	ND	ND	ND	ND	ND	ND	ND
Q9PIP3	Cj0252	moaC Cj0252	Cyclic pyranopterin monophosphate synthase accessory protein (Molybdenum cofactor biosynthesis protein C)	4	4	4	4	0.732635	0.773918	0.985225	0.901945	0.848431	0.11628	Q9PIP3	Cj0252	4	4	9	1.46392	0.793405	0.787009	1.01478	0.9507
Q9PIP2	Cj0253	Cj0253	Uncharacterized protein Cj0253	4	4	5	5	1.73117	1.48225	1.30145	1.6689	1.54594	0.0033279	Q9PIP2	Cj0253	3	4	3	1.70155	1.20474	0.64607	1.18412	0.5785
Q0PBQ1	Cj0254	Cj0254	Glutamyl-tRNA reductase	25	25	22	22	1.15388	1.10332	1.04993	1.16019	1.11683	0.0387	Q0PBQ1	Cj0254	21	21	21	1.3232	0.992391	0.80145	1.03901	0.8106
Q0PBQ0	Cj0255c	exoA Cj0255c	Exodeoxyribonuclease (EC 3.1.11.2)	27	27	20	20	1.27694	1.05293	1.09017	0.989349	1.10235	0.3316	Q0PBQ0	Cj0255c	14	14	14	1.12252	0.907716	1.26878	1.09967	0.3956
Q0PBP9	Cj0256	eptC Cj0256	Putative sulfatase family protein	12	12	17	17	0.874685	0.857837	0.792142	0.79973	0.831099	0.049583	Q0PBP9	Cj0256	20	17	19	1.29465	0.989851	0.960627	1.08171	0.4869
Q0PBP7	Cj0258	Cj0258	Putative bacterial regulatory protein, ArsR family	ND	ND	1	1	ND	ND	0.74883	0.80379	0.77631	ND	Q0PBP7	Cj0258	ND	ND	ND	ND	ND	ND	ND	ND
Q0PBP6	Cj0259	pyrC Cj0259	Dihydroorotase (EC 3.5.2.3)	21	21	20	20	1.10688	1.0763	1.1916	1.08204	1.1142	0.046	Q0PBP6	Cj0259	15	15	15	1.12569	1.42058	0.667239	1.07117	0.7617
Q0PBP4	Cj0261c	Cj0261c	Putative SAM-dependent methyltransferase	25	25	26	26	1.17579	1.10274	1.16037	1.11083	1.13743	0.01775	Q0PBP4	Cj0261c	11	11	11	0.777222	1.28706	1.54566	1.20331	0.4187
Q0PBP3	Cj0262c	tlp4 Cj0262c	Putative methyl-accepting chemotaxis signal transduction protein	47	20	47	20	0.68253	0.733924	0.742763	0.743454	0.725668	0.01033	Q0PBP3	Cj0262c	68	46	31	0.8634	0.865047	1.05058	0.926344	0.3014
Q9PIN2	Cj0263	zupT Cj0263	Zinc transporter ZupT	3	3	3	3	0.597922	0.641948	0.549368	0.66121	0.612612	0.000682	Q9PIN2	Cj0263	6	3	ND	1.28706	1.64971	ND	1.46838	0.1229
Q0PBP1	Cj0264c	torA Cj0264c	Trimethylamine-N-oxide reductase (EC 1.7.2.3)	63	63	61	61	0.815915	0.882277	0.818789	0.907094	0.856019	0.030979	Q0PBP1	Cj0264c	86	77	86	0.90925	1.14492	0.762075	0.938747	0.612
Q0PBP0	Cj0265c	Cj0265c	Putative cytochrome C-type haem-binding periplasmic protein	17	17	16	16	0.8272	0.430469	0.384647	0.748014	0.597583	0.0735	Q0PBP0	Cj0265c	17	17	22	0.617803	0.854481	0.728576	0.73362	0.0176
Q0PBN9	Cj0266c	Cj0266c	Putative integral membrane protein	1	1	1	1	1.10178	1.35654	0.581868	0.569051	0.902311	0.4153	Q0PBN9	Cj0266c	4	ND	ND	1.42677	ND	ND	1.42677	ND
Q0PBN8	Cj0267c	Cj0267c	Putative integral membrane protein	3	3	3	3	0.929659	0.849133	1.18416	1.17047	1.03335	0.64611	Q0PBN8	Cj0267c	7	3	7	1.22783	1.12279	0.983596	1.11141	0.1904
Q0PBN7	Cj0268c	Cj0268c	Putative transmembrane protein	31	31	31	31	0.663443	0.731127	0.682833	0.670901	0.687076	0.0029827	Q0PBN7	Cj0268c	38	31	38	0.81281	0.941733	0.81542	0.856654	0.0281
Q0PBN6	Cj0269c	ilvE Cj0269c	Branched-chain amino acid aminotransferase (EC 2.6.1.42)	28	28	28	28	0.867342	0.930998	0.904719	0.880975	0.896009	0.0077	Q0PBN6	Cj0269c	29	28	29	0.965849	0.84675	0.920093	0.910897	0.0621
Q9PIM5	Cj0270	Cj0270	Probable tautomerase Cj0270 (EC 5.3.2.-)	6	6	7	7	0.691959	0.75984	0.789679	0.833712	0.768798	0.0066	Q9PIM5	Cj0270	ND	ND	3	ND	ND	0.795945	0.795945	ND
Q0PBN4	Cj0271	Cj0271	Bacterioferritin comigratory protein homolog (Thioredoxin peroxidase)	20	20	20	20	0.935526	0.718388	0.803705	0.858567	0.829046	0.25742	Q0PBN4	Cj0271	17	17	17	0.82835	0.797638	0.712315	0.779435	0.0032
Q0PBN3	Cj0272	queH Cj0272	Epoxyqueuosine reductase QueH (EC 1.17.99.6) (Queuosine biosynthesis protein QueH)	7	7	6	6	1.00722	1.03792	0.983546	1.11131	1.035	0.39058	Q0PBN3	Cj0272	13	11	13	1.19044	1.05082	1.16173	1.13433	0.0343
Q9PIM2	Cj0273	fabZ Cj0273	3-hydroxyacyl-[acyl-carrier-protein] dehydratase FabZ (EC 4.2.1.59) ((3R)-hydroxymyristoyl-[acyl-carrier-protein] dehydratase) ((3R)-hydroxymyristoyl-ACP dehydrase) (Beta-hydroxyacyl-ACP dehydratase)	10	10	12	12	1.29102	1.21876	1.21336	1.2315	1.23866	0.0011709	Q9PIM2	Cj0273	10	10	10	1.02701	2.12162	0.81796	1.3222	0.4701
Q9PIM1	Cj0274	lpxA Cj0274	Acyl-[acyl-carrier-protein]--UDP-N-acetylglucosamine O-acyltransferase (UDP-N-acetylglucosamine acyltransferase) (EC 2.3.1.129)	16	16	15	15	1.08336	1.05166	1.03358	1.09676	1.06634	0.0376	Q9PIM1	Cj0274	18	15	18	1.33679	0.934812	1.09956	1.12372	0.3487
Q9PIM0	Cj0275	clpX Cj0275	ATP-dependent Clp protease ATP-binding subunit ClpX	25	25	23	23	1.05477	1.10006	1.10092	1.07517	1.08273	0.0076	Q9PIM0	Cj0275	34	28	29	0.993705	0.94836	0.760175	0.900747	0.2374
Q0PBM9	Cj0276	mreB Cj0276	Homolog of E. coli rod shape-determining protein	33	33	30	30	0.995318	1.03165	1.06946	1.08116	1.0444	0.2032	Q0PBM9	Cj0276	33	33	38	1.52253	0.767155	0.692405	0.99403	0.9831
Q0PBM8	Cj0277	mreC Cj0277	Homolog of E. coli rod shape-determining protein	11	11	5	5	0.84639	0.820249	0.895647	0.917138	0.869856	0.014267	Q0PBM8	Cj0277	11	11	11	1.39656	1.12448	0.770715	1.09725	0.6199
Q9PIL7	Cj0279	carB Cj0279	Carbamoyl-phosphate synthase large chain (EC 6.3.5.5) (Carbamoyl-phosphate synthetase ammonia chain)	75	75	72	72	1.15483	1.03652	1.22041	1.04121	1.11324	0.061354	Q9PIL7	Cj0279	74	74	74	1.10192	0.901823	0.873846	0.959196	0.6003
Q0PBM6	Cj0280	Cj0280	Putative uncharacterized protein (Sua5 YciO YrdC YwlC family protein)	2	2	3	3	0.876519	1.65423	1.31026	1.51223	1.33831	0.1396	Q0PBM6	Cj0280	13	13	13	1.34577	1.30654	1.34499	1.33243	7.42e-05
Q9PIL5	Cj0281c	tal Cj0281c	Transaldolase (EC 2.2.1.2)	34	34	34	34	1.10345	1.03257	1.10851	1.05822	1.07569	0.0509	Q9PIL5	Cj0281c	34	34	34	0.939965	0.78155	0.856678	0.859398	0.0723
Q0PBM4	Cj0282c	serB Cj0282c	Putative phosphoserine phosphatase (EC 3.1.3.3)	15	15	14	14	1.09021	1.00256	1.12051	0.990327	1.0509	0.25348	Q0PBM4	Cj0282c	10	9	10	1.83035	1.0686	0.764825	1.22126	0.5235
Q0PBM3	Cj0283c	cheW Cj0283c	Chemotaxis protein	25	24	25	24	1.13295	1.06165	1.10403	1.00696	1.0764	0.1364	Q0PBM3	Cj0283c	26	24	25	0.989579	1.00171	0.719668	0.903651	0.3544
Q0PBM2	Cj0284c	cheA Cj0284c	Chemotaxis histidine kinase (EC 2.7.3.-)	73	73	69	69	1.08373	1.02134	1.11851	1.02788	1.06286	0.1457	Q0PBM2	Cj0284c	91	74	90	0.869656	1.15347	0.734132	0.919085	0.5483
Q0PBM1	Cj0285c	cheV Cj0285c	Chemotaxis protein (EC 2.7.3.-)	36	36	35	34	1.17102	1.14356	1.16178	1.11992	1.14907	0.0082434	Q0PBM1	Cj0285c	32	34	31	0.914027	0.97969	0.823074	0.905597	0.1061
Q0PBM0	Cj0286c	Cj0286c	UDP-2,3-diacylglucosamine diphosphatase (LpxH-like)	3	3	3	3	1.98451	1.54926	1.18276	1.48229	1.54971	0.0449	Q0PBM0	Cj0286c	3	3	3	2.1584	3.13688	1.63658	2.31062	0.0407
Q9PIK9	Cj0287c	greA Cj0287c	Transcription elongation factor GreA (Transcript cleavage factor GreA)	29	29	27	27	1.30467	1.06274	1.43371	1.05478	1.21397	0.10058	Q9PIK9	Cj0287c	22	22	22	1.24492	1.22141	1.10924	1.19186	0.0102
Q9PIK8	Cj0288c	lpxB Cj0288c	Lipid-A-disaccharide synthase (EC 2.4.1.182)	9	9	7	7	1.13443	1.02771	1.22302	0.947804	1.08324	0.4093	Q9PIK8	Cj0288c	6	7	6	1.63912	1.18206	0.682198	1.1678	0.5765
Q0PBL7	Cj0289c	peb3 Cj0289c	Major antigenic peptide PEB3	18	18	19	19	0.520868	0.516615	0.494653	0.150701	0.420709	0.007618	Q0PBL7	Cj0289c	28	19	28	0.248249	0.429302	0.522628	0.40006	0.00174
Q9PIK6	Cj0293	surE Cj0293	5'-nucleotidase SurE (EC 3.1.3.5) (Nucleoside 5'-monophosphate phosphohydrolase)	9	9	7	7	0.887714	0.991324	0.891771	0.834985	0.901449	0.1143	Q9PIK6	Cj0293	12	9	12	0.766552	1.2063	1.50129	1.15804	0.5002
Q0PBL5	Cj0294	Cj0294	Putative MoeB/ThiF family protein	10	10	9	9	0.859792	0.93896	0.859431	0.960153	0.904584	0.073	Q0PBL5	Cj0294	14	10	12	1.9184	1.0559	0.704102	1.22613	0.5647
Q9PIK3	Cj0296c	panD Cj0296c	Aspartate 1-decarboxylase (EC 4.1.1.11) (Aspartate alpha-decarboxylase) [Cleaved into: Aspartate 1-decarboxylase beta chain; Aspartate 1-decarboxylase alpha chain]	3	3	4	4	0.648911	0.710184	0.860146	0.935768	0.788752	0.1002	Q9PIK3	Cj0296c	ND	ND	ND	ND	ND	ND	ND	ND
Q9PIK2	Cj0297c	panC Cj0297c	Pantothenate synthetase (PS) (EC 6.3.2.1) (Pantoate--beta-alanine ligase) (Pantoate-activating enzyme)	26	26	22	22	1.01253	0.835963	0.962625	0.866551	0.919417	0.24263	Q9PIK2	Cj0297c	21	21	21	0.969811	0.845903	0.884525	0.90008	0.0525
Q9PIK1	Cj0298c	panB Cj0298c	3-methyl-2-oxobutanoate hydroxymethyltransferase (EC 2.1.2.11) (Ketopantoate hydroxymethyltransferase) (KPHMT)	24	24	21	21	0.871484	0.826355	0.949769	0.901243	0.887213	0.0441	Q9PIK1	Cj0298c	24	25	25	0.991089	0.850137	0.793907	0.878378	0.1068
Q0PBL0	Cj0299	Cj0299	Putative periplasmic beta-lactamase (EC 3.5.2.6)	5	5	5	5	2.14984	1.84106	1.77655	1.72117	1.87216	0.0064843	Q0PBL0	Cj0299	2	2	ND	1.12787	1.7589	ND	1.44339	0.2951
Q0PBK9	Cj0300c	modC Cj0300c	Putative molybdenum transport ATP-binding protein	11	11	6	6	0.610816	0.730481	0.772876	0.999295	0.778367	0.1431	Q0PBK9	Cj0300c	9	4	8	0.569105	1.27012	0.675598	0.838276	0.4996
Q0PBK7	Cj0302c	Cj0302c	Putative molybdenum-pterin binding protein	1	1	1	1	0.593342	0.963806	0.601197	0.62045	0.694699	0.0863	Q0PBK7	Cj0302c	ND	ND	ND	ND	ND	ND	ND	ND
Q0PBK6	Cj0303c	modA Cj0303c	Putative molybdate-binding lipoprotein	20	20	19	19	1.26494	0.864245	1.29704	0.789679	1.05398	0.99275	Q0PBK6	Cj0303c	14	14	14	2.0867	2.10438	2.01633	2.06913	4.12e-06
Q0PBK5	Cj0304c	bioC Cj0304c	Putative biotin synthesis protein	9	9	9	9	1.35829	1.23545	1.2626	1.19125	1.2619	0.013221	Q0PBK5	Cj0304c	ND	3	4	ND	1.23456	1.06111	1.14784	0.1063
Q0PBK4	Cj0305c	Cj0305c	Putative uncharacterized protein (DUF452 family protein)	10	10	10	10	1.37137	1.29523	1.31953	2.35464	1.58519	ND	Q0PBK4	Cj0305c	5	5	5	3.20205	3.2664	1.77309	2.74718	0.0231
Q0PBK3	Cj0306c	bioF Cj0306c	8-amino-7-oxononanoate synthase (EC 2.3.1.47)	4	4	8	8	0.88695	0.741875	0.778148	0.775503	0.795619	0.0125	Q0PBK3	Cj0306c	7	7	7	0.917947	0.937589	0.806106	0.887214	0.0511
Q0PBK2	Cj0307	bioA Cj0307	Adenosylmethionine-8-amino-7-oxononanoate aminotransferase (EC 2.6.1.62)	19	19	19	19	0.920929	0.92168	0.915494	0.918753	0.919214	0.15014	Q0PBK2	Cj0307	7	7	7	1.42673	0.505845	1.16428	1.03229	0.9119
Q9PIJ1	Cj0308c	bioD Cj0308c	ATP-dependent dethiobiotin synthetase BioD (EC 6.3.3.3) (DTB synthetase) (DTBS) (Dethiobiotin synthase)	4	4	4	4	1.06359	0.958165	1.19253	1.05471	1.06725	0.37818	Q9PIJ1	Cj0308c	5	4	ND	1.08045	1.56189	ND	1.32117	0.1714
Q9PII8	Cj0311	rplY ctc Cj0311	50S ribosomal protein L25 (General stress protein CTC)	25	25	25	25	0.697444	0.902386	0.702063	0.877173	0.794766	0.068	Q9PII8	Cj0311	25	30	30	0.795293	0.768271	0.729898	0.764488	0.0002
Q9PII7	Cj0312	pth Cj0312	Peptidyl-tRNA hydrolase (PTH) (EC 3.1.1.29)	12	12	14	14	1.35237	1.1688	1.20921	1.75823	1.37215	0.0698	Q9PII7	Cj0312	7	11	7	2.94343	1.83745	4.13859	2.97316	0.0412
Q0PBJ6	Cj0313	Cj0313	Putative integral membrane protein	6	6	5	5	1.74671	2.25229	1.19904	1.39243	1.64762	0.030258	Q0PBJ6	Cj0313	6	5	6	2.31353	1.37936	1.22994	1.64094	0.1317
Q9PII5	Cj0314	lysA Cj0314	Diaminopimelate decarboxylase (DAP decarboxylase) (DAPDC) (EC 4.1.1.20)	21	21	20	20	1.00111	1.10043	0.973212	0.998795	1.01839	0.45383	Q9PII5	Cj0314	16	18	16	1.73259	0.988157	1.11084	1.27719	0.2953
Q0PBJ4	Cj0315	Cj0315	Putative HAD-superfamily hydrolase, subfamily IIA	19	19	18	18	0.974199	0.993632	1.05858	1.02871	1.01378	0.31839	Q0PBJ4	Cj0315	19	18	15	0.846678	0.887223	1.12874	0.954213	0.6305
Q0PBJ3	Cj0316	pheA Cj0316	Chorismate mutase/prephenate dehydratase (EC 4.2.1.51) (EC 5.4.99.5)	29	29	27	27	1.24947	1.19807	1.18246	1.16508	1.19877	0.0026045	Q0PBJ3	Cj0316	25	27	18	1.01525	1.33279	1.01525	1.1211	0.3164
Q9PII2	Cj0317	hisC Cj0317	Histidinol-phosphate aminotransferase (EC 2.6.1.9) (Imidazole acetol-phosphate transaminase)	39	39	37	37	0.906109	0.903371	0.96627	0.964892	0.935161	0.09486	Q9PII2	Cj0317	18	22	18	0.914294	0.980536	1.04083	0.978553	0.5888
Q0PBJ1	Cj0318	fliF Cj0318	Flagellar M-ring protein	23	23	20	20	0.697346	0.769524	0.816275	0.845147	0.782073	0.0108	Q0PBJ1	Cj0318	37	34	37	1.34276	1.14109	1.26928	1.25104	0.0131
Q0PBJ0	Cj0319	fliG Cj0319	Flagellar motor switch protein	25	25	22	22	1.5856	1.82855	1.37195	1.42195	1.55201	0.0083951	Q0PBJ0	Cj0319	25	25	24	1.8768	1.7775	1.12025	1.59151	0.0673
Q0PBI9	Cj0320	fliH Cj0320	Putative flagellar assembly protein	35	35	31	31	1.20764	1.21223	1.96016	1.30591	1.42149	0.1022	Q0PBI9	Cj0320	31	25	23	1.40787	2.01374	1.094	1.5052	0.1346
Q9PIH8	Cj0321	dxs Cj0321	1-deoxy-D-xylulose-5-phosphate synthase (EC 2.2.1.7) (1-deoxyxylulose-5-phosphate synthase) (DXP synthase) (DXPS)	22	22	24	24	1.24863	1.03012	1.15647	1.63154	1.26669	0.57765	Q9PIH8	Cj0321	24	24	24	1.31812	1.07622	1.61173	1.33536	0.0962
Q0PBI7	Cj0322	perR Cj0322	Peroxide stress regulator	7	7	9	9	1.20843	1.13934	1.1183	1.14981	1.15397	0.0058194	Q0PBI7	Cj0322	7	7	7	1.24325	1.1211	0.995281	1.11988	0.1693
Q0PBI6	Cj0323	Cj0323	Putative uncharacterized protein	3	3	3	3	1.12637	1.11673	0.921887	0.923105	1.02202	0.7055	Q0PBI6	Cj0323	8	8	8	1.06143	1.04489	1.45247	1.18626	0.2354
Q9PIH5	Cj0324	ubiE Cj0324	Ubiquinone/menaquinone biosynthesis methyltransferase ubiE (EC 2.1.1.163) (EC 2.1.1.201) (2-methoxy-6-polyprenyl-1,4-benzoquinol methylase) (Demethylmenaquinone methyltransferase)	18	18	17	17	1.12275	1.07506	1.06796	1.06628	1.08301	0.041739	Q9PIH5	Cj0324	14	14	14	1.32507	0.731592	1.1428	1.06649	0.7241
Q9PIH4	Cj0325	xseA Cj0325	Exodeoxyribonuclease 7 large subunit (EC 3.1.11.6) (Exodeoxyribonuclease VII large subunit) (Exonuclease VII large subunit)	7	7	7	7	1.03575	0.802033	1.13719	1.03415	1.00228	0.98777	Q9PIH4	Cj0325	ND	4	7	ND	0.795098	1.07753	0.936314	0.5878
Q9PIH3	Cj0326	serC Cj0326	Phosphoserine aminotransferase (EC 2.6.1.52) (Phosphohydroxythreonine aminotransferase) (PSAT)	31	31	28	28	1.23878	1.10988	1.24857	1.06284	1.16502	0.062943	Q9PIH3	Cj0326	22	22	22	1.25751	1.17269	1.05166	1.16062	0.0547
Q0PBI2	Cj0327	cfiQ Cj0327	Putative endoribonuclease L-PSP family protein	9	9	9	9	1.31976	1.08688	1.15944	0.897561	1.11591	0.25519	Q0PBI2	Cj0327	6	8	6	0.968071	0.73828	1.06606	0.924136	0.4784
Q9PIH1	Cj0328c	fabH Cj0328c	3-oxoacyl-[acyl-carrier-protein] synthase 3 (EC 2.3.1.180) (3-oxoacyl-[acyl-carrier-protein] synthase III) (Beta-ketoacyl-ACP synthase III) (KAS III)	22	22	19	19	1.22777	1.1383	1.18985	1.09334	1.16232	0.018791	Q9PIH1	Cj0328c	19	17	16	1.4746	1.19454	1.32008	1.32974	0.0152
Q9PIH0	Cj0329c	plsX Cj0329c	Phosphate acyltransferase (EC 2.3.1.n2) (Acyl-ACP phosphotransacylase) (Acyl-[acyl-carrier-protein]--phosphate acyltransferase) (Phosphate-acyl-ACP acyltransferase)	20	20	17	17	0.977058	0.997044	0.995769	1.01894	0.997203	0.78282	Q9PIH0	Cj0329c	19	19	19	1.03667	1.13157	0.826935	0.998391	0.9866
Q9PIG9	Cj0330c	rpmF Cj0330c	50S ribosomal protein L32	6	6	6	6	0.724045	0.592631	0.525666	0.552633	0.598744	0.00374	Q9PIG9	Cj0330c	10	10	10	0.651417	0.482647	0.522407	0.552157	0.0009
Q0PBH8	Cj0331c	Cj0331c	Putative uncharacterized protein (DUF177 domain-containing protein)	6	6	4	4	1.17436	1.03036	1.1069	1.1008	1.10311	0.12209	Q0PBH8	Cj0331c	ND	ND	ND	ND	ND	ND	ND	ND
Q9PIG7	Cj0332c	ndk Cj0332c	Nucleoside diphosphate kinase (NDK) (NDP kinase) (EC 2.7.4.6) (Nucleoside-2-P kinase)	19	19	17	17	1.1179	0.964129	1.08095	0.982106	1.03627	0.28501	Q9PIG7	Cj0332c	17	17	17	1.79586	0.85183	0.715942	1.12121	0.7392
Q0PBH6	Cj0333c	fdxA Cj0333c	Ferredoxin	6	6	5	5	1.31182	1.5935	1.20051	1.50131	1.40179	0.0204	Q0PBH6	Cj0333c	5	5	6	1.49738	2.34342	1.85945	1.90008	0.0213
Q0PBH5	Cj0334	ahpC Cj0334	Alkyl hydroperoxide reductase (EC 3.4.-.-)	25	25	24	24	0.999647	0.940697	1.0487	0.963344	0.988096	0.98447	Q0PBH5	Cj0334	27	26	27	0.962556	0.813411	0.878926	0.884964	0.0561
Q0PBH4	Cj0335	flhB Cj0335	Flagellar biosynthetic protein	ND	ND	1	1	ND	ND	0.628137	0.617527	0.622832	ND	Q0PBH4	Cj0335	5	2	ND	1.76124	1.84195	ND	1.80159	0.0025
Q0PBH3	Cj0336c	motB Cj0336c	Putative flagellar motor protein	11	11	12	12	1.98955	1.49033	0.901887	1.00786	1.34741	0.2579	Q0PBH3	Cj0336c	23	22	23	1.76934	2.35228	1.2056	1.77574	0.0791
Q0PBH2	Cj0337c	motA Cj0337c	Putative flagellar motor proton channel	10	10	10	10	1.18812	1.8666	1.16913	1.36499	1.39721	0.0902	Q0PBH2	Cj0337c	13	13	11	1.52653	1.34766	1.7403	1.53816	0.00901
Q0PBH1	Cj0338c	polA Cj0338c	DNA polymerase (EC 2.7.7.7)	49	49	41	41	1.06066	1.12843	1.11224	1.13093	1.10807	0.0116	Q0PBH1	Cj0338c	57	55	57	1.25576	1.00927	0.946666	1.07057	0.4961
Q0PBH0	Cj0339	Cj0339	Putative MFS (Major Facilitator Superfamily) transport protein	1	1	2	2	0.643732	0.746535	0.713907	0.76477	0.717236	0.010376	Q0PBH0	Cj0339	7	7	7	1.03896	0.792282	0.915622	0.915622	0.3016
Q0PBG9	Cj0340	Cj0340	Putative nucleoside hydrolase	22	22	18	18	1.24323	1.73803	1.74035	1.65176	1.59334	0.0045407	Q0PBG9	Cj0340	9	9	9	1.83083	1.32432	1.38591	1.51368	0.0323
Q0PBG7	Cj0342c	uvrA Cj0342c	Excinuclease ABC subunit A	53	53	42	42	1.04975	1.07857	1.02221	1.02648	1.04425	0.0848	Q0PBG7	Cj0342c	70	72	72	1.08063	0.942433	0.881165	0.968076	0.6171
Q0PBG4	Cj0345	trpE Cj0345	Putative anthranilate synthase component I (EC 4.1.3.27)	17	17	15	15	1.07523	2.73727	1.26768	1.35686	1.60926	ND	Q0PBG4	Cj0345	10	10	10	1.20378	1.29214	1.46681	1.32091	0.0142
Q0PBG3	Cj0346	trpD (trpGD) Cj0346	Anthranilate synthase component II (EC 4.1.3.27)	25	25	16	16	1.10315	1.13284	2.47309	1.22856	1.48441	0.2391	Q0PBG3	Cj0346	14	16	16	2.32548	2.85561	1.29988	2.16032	0.0412
Q9PIF3	Cj0347	trpF Cj0347	N-(5'-phosphoribosyl)anthranilate isomerase (PRAI) (EC 5.3.1.24)	1	1	3	3	0.875004	0.877931	1.38913	1.36677	1.37795	0.0188	Q9PIF3	Cj0347	ND	3	5	ND	0.641836	0.585883	0.61386	0.00036
Q9PIF2	Cj0348	trpB Cj0348	Tryptophan synthase beta chain (EC 4.2.1.20)	15	15	15	15	1.01109	1.6697	1.13092	1.40538	1.30427	0.1305	Q9PIF2	Cj0348	26	19	22	2.30368	1.59107	1.49335	1.79603	0.0356
Q9PIF1	Cj0349	trpA Cj0349	Tryptophan synthase alpha chain (EC 4.2.1.20)	10	10	9	9	1.11061	1.6036	1.41983	2.15187	1.57148	0.040602	Q9PIF1	Cj0349	10	10	10	1.88726	1.48526	2.06531	1.81261	0.00914
Q0PBF9	Cj0350	Cj0350	Putative uncharacterized protein (CheX domain-containing protein)	13	13	16	16	1.52489	1.42502	1.80141	1.73426	1.6214	0.0091966	Q0PBF9	Cj0350	10	13	10	1.08758	1.10412	1.22715	1.13962	0.0912
Q0PBF8	Cj0351	fliN Cj0351	Flagellar motor switch protein	6	6	6	6	1.37193	1.28392	1.32517	1.54572	1.38168	0.016464	Q0PBF8	Cj0351	4	4	4	2.77554	2.29605	1.02711	2.0329	0.1188
Q0PBF7	Cj0352	Cj0352	Putative transmembrane protein	7	7	9	9	0.953799	0.790771	0.980763	1.10514	0.957618	0.60937	Q0PBF7	Cj0352	16	16	16	0.857276	1.03219	0.992854	0.960773	0.5001
Q0PBF6	Cj0353c	Cj0353c	Phosphatase (EC 3.6.1.11) (EC 3.6.1.40)	21	21	24	24	0.965272	0.844173	0.828026	0.850195	0.871916	0.0533	Q0PBF6	Cj0353c	22	22	22	1.10637	0.685574	0.931425	0.90779	0.492
Q0PBF5	Cj0354c	fdxB Cj0354c	Ferredoxin	2	2	2	2	2.44802	2.53479	1.42759	2.2761	2.17163	0.013434	Q0PBF5	Cj0354c	ND	ND	ND	ND	ND	ND	ND	ND
Q0PBF4	Cj0355c	cosR Cj0355c	Two-component regulator	28	28	27	27	0.694062	0.194545	0.752441	0.688118	0.582292	0.039375	Q0PBF4	Cj0355c	30	30	30	0.613718	0.730745	0.557064	0.633842	0.0021
Q0PBF3	Cj0356c	folB Cj0356c	Putative dihydroneopterin aldolase (EC 4.1.2.25)	2	2	2	2	1.11244	1.06679	1.03581	1.08447	1.07488	0.1424	Q0PBF3	Cj0356c	ND	ND	ND	ND	ND	ND	ND	ND
Q9PIE4	Cj0357c	plsY Cj0357c	Glycerol-3-phosphate acyltransferase (Acyl-PO4 G3P acyltransferase) (Acyl-phosphate--glycerol-3-phosphate acyltransferase) (G3P acyltransferase) (GPAT) (EC 2.3.1.n3) (Lysophosphatidic acid synthase) (LPA synthase)	1	1	2	2	1.07527	0.835733	0.951053	1.0793	0.985339	0.10077	Q9PIE4	Cj0357c	3	2	3	1.62817	0.606273	0.951272	1.0619	0.8467
Q0PBF1	Cj0358	Cj0358	Putative cytochrome C551 peroxidase (EC 1.11.1.5)	35	35	34	34	0.966485	0.148575	0.623849	0.550811	0.57243	0.0841	Q0PBF1	Cj0358	47	44	44	0.182626	0.705343	0.495103	0.461024	0.0238
Q9PIE2	Cj0360	glmM Cj0360	Phosphoglucosamine mutase (EC 5.4.2.10)	33	33	30	30	0.846339	0.811335	0.810988	0.881018	0.83742	0.0023718	Q9PIE2	Cj0360	49	48	48	0.963352	1.04579	0.933968	0.981038	0.6013
Q0PBE8	Cj0362	Cj0362	Putative integral membrane protein (Protoporphyrinogen IX oxidase (PPO) (EC 1.3.99.-))	2	2	2	2	0.69976	0.953363	0.709744	0.791042	0.788477	0.074	Q0PBE8	Cj0362	ND	ND	ND	ND	ND	ND	ND	ND
Q0PBE7	Cj0363c	hemN Cj0363c	Putative oxygen-independent coproporphyrinogen III oxidase (EC 1.3.99.22)	13	13	12	12	0.787906	0.769688	0.741807	0.863711	0.790778	0.033817	Q0PBE7	Cj0363c	14	14	14	1.24526	1.01525	0.804634	1.02171	0.8728
Q0PBE6	Cj0364	Cj0364	Putative uncharacterized protein (Chain-length determining protein)	13	13	11	11	0.681558	0.656923	0.505797	0.790672	0.658738	0.0179	Q0PBE6	Cj0364	8	9	8	0.65198	0.685867	0.837214	0.72502	0.0085
Q0PBE5	Cj0365c	cmeC Cj0365c	Outer membrane channel protein CmeC (Multidrug efflux system CmeABC)	21	20	21	21	1.0401	1.19957	1.2112	1.3423	1.19829	0.0491	Q0PBE5	Cj0365c	28	21	27	1.46462	1.65028	1.52769	1.54753	0.0006
Q0PBE4	Cj0366c	cmeB Cj0366c	Inner membrane efflux transporter CmeB (Multidrug efflux system CmeABC)	20	20	18	18	1.33789	1.12798	1.27463	1.06673	1.20181	0.0491	Q0PBE4	Cj0366c	36	36	36	1.36248	1.36372	1.42	1.38206	2.1e-05
Q0PBE3	Cj0367c	cmeA acrA Cj0367c	Periplasmic fusion protein CmeA (Multidrug efflux system CmeABC)	22	22	19	19	1.09578	1.10755	1.25622	1.85696	1.32913	0.2891	Q0PBE3	Cj0367c	29	27	30	2.80393	2.0204	1.40841	2.07758	0.0491
Q0PBE2	Cj0368c	cmeR Cj0368c	Transcriptional regulator CmeR	14	14	10	10	1.16881	1.16783	1.08463	1.07916	1.1251	0.029079	Q0PBE2	Cj0368c	8	10	8	1.31065	0.821347	1.33219	1.15473	0.4061
Q0PBE1	Cj0369c	Cj0369c	Putative ferredoxin domain-containing integral membrane protein	14	14	9	9	0.835407	0.967215	0.813311	0.870688	0.871655	0.11045	Q0PBE1	Cj0369c	23	22	22	2.61382	1.99767	2.31714	2.30954	0.0018
Q9PID2	Cj0370	rpsU Cj0370	30S ribosomal protein S21	10	10	10	10	1.30494	1.20837	1.10972	1.04878	1.16795	0.1175	Q9PID2	Cj0370	10	12	12	1.78694	0.893321	0.471875	1.05071	0.9022
Q9PID1	Cj0371	Cj0371	UPF0323 lipoprotein Cj0371	12	12	10	10	0.873289	0.866572	0.793199	0.794481	0.831886	0.007	Q9PID1	Cj0371	15	15	12	1.05917	1.04861	0.812033	0.973271	0.757
Q0PBD8	Cj0372	Cj0372	Putative glutathionylspermidine synthase (EC 6.3.1.8)	15	15	16	16	0.810173	0.998836	0.754114	1.11188	0.91875	0.32839	Q0PBD8	Cj0372	12	12	12	1.02507	0.7426	0.763081	0.843582	0.1605
Q0PBD7	Cj0373	Cj0373	Putative D-2-hydroxyacid dehydrogenase	37	37	34	34	1.10887	1.05507	1.10674	1.02864	1.07483	0.092006	Q0PBD7	Cj0373	29	29	29	1.1376	0.687561	1.11761	0.980923	0.9029
Q9PIC8	Cj0374	Cj0374	UPF0234 protein Cj0374	26	26	23	23	1.36194	1.17465	1.24206	1.10823	1.22172	0.0524	Q9PIC8	Cj0374	26	26	26	1.63345	1.01342	1.16649	1.27112	0.2196
Q0PBD5	Cj0375	Cj0375	Putative lipoprotein	8	8	6	6	0.97167	0.99543	1.02305	0.918043	0.977048	0.78733	Q0PBD5	Cj0375	6	7	7	0.983103	1.09803	0.698715	0.926616	0.5698
Q0PBD4	Cj0376	Cj0376	Putative periplasmic protein	14	14	13	13	1.10458	1.06477	1.10725	1.05937	1.08399	0.07635	Q0PBD4	Cj0376	10	10	9	1.74638	0.874241	0.939892	1.18684	0.5417
Q0PBD3	Cj0377	Cj0377	Putative AAA family ATPase	15	15	15	15	0.856221	0.899201	0.933898	0.907237	0.899139	0.019682	Q0PBD3	Cj0377	20	16	18	1.16829	1.05928	1.22607	1.15121	0.0365
Q9PIC3	Cj0379c	yedY Cj0379c	Sulfoxide reductase catalytic subunit YedY (EC 1.8.-.-) (Protein-methionine-sulfoxide reductase catalytic subunit MsrP (EC 1.8.5.-))	20	20	16	16	1.03286	0.934977	1.23032	1.83958	1.25943	0.291	Q9PIC3	Cj0379c	9	9	9	2.24365	2.22434	1.92273	2.13024	0.0004
Q0PBD0	Cj0380c	Cj0380c	Putative uncharacterized protein (Tetricopeptide repeat protein)	2	2	ND	ND	1.02317	1.17058	ND	ND	1.09687	ND	Q0PBD0	Cj0380c	ND	2	3	ND	1.14989	1.81679	1.48334	0.147
Q9PIC1	Cj0381c	pyrF Cj0381c	Orotidine 5'-phosphate decarboxylase (EC 4.1.1.23) (OMP decarboxylase) (OMPDCase) (OMPdecase)	13	13	18	18	1.28809	1.14566	1.19595	1.1279	1.1894	0.015609	Q9PIC1	Cj0381c	10	10	10	1.78219	0.782397	1.05047	1.20502	0.5303
Q9PIC0	Cj0382c	nusB Cj0382c	N utilization substance protein B homolog (Protein NusB)	4	4	3	3	1.0753	1.20528	0.991044	1.04568	1.07933	0.3094	Q9PIC0	Cj0382c	2	2	ND	0.966988	0.673918	ND	0.820453	0.3452
Q9PIB9	Cj0383c	ribH Cj0383c	6,7-dimethyl-8-ribityllumazine synthase (DMRL synthase) (LS) (Lumazine synthase) (EC 2.5.1.78)	19	19	18	18	1.20068	0.842085	1.1095	0.838507	0.997693	0.95209	Q9PIB9	Cj0383c	14	14	14	0.658637	0.799305	0.758688	0.738877	0.0033
Q9PIB8	Cj0384c	kdsA Cj0384c	2-dehydro-3-deoxyphosphooctonate aldolase (EC 2.5.1.55) (3-deoxy-D-manno-octulosonic acid 8-phosphate synthase) (KDO-8-phosphate synthase) (KDO 8-P synthase) (KDOPS) (Phospho-2-dehydro-3-deoxyoctonate aldolase)	31	31	27	27	1.02247	0.994008	1.10294	1.08492	1.05108	0.13264	Q9PIB8	Cj0384c	26	27	24	0.934253	1.05844	0.928349	0.97368	0.5685
Q9PIB6	Cj0386	der engA Cj0386	GTPase Der (GTP-binding protein EngA)	19	19	18	18	0.86148	0.803264	0.773024	0.806971	0.811185	0.0082434	Q9PIB6	Cj0386	28	24	27	1.21504	0.960214	1.03925	1.0715	0.3961
Q0PBC3	Cj0387	aroK Cj0387	Shikimate kinase (SK) (EC 2.7.1.71)	14	14	12	12	0.856949	0.853979	1.03099	1.04129	0.945803	0.41233	Q0PBC3	Cj0387	10	12	10	0.711942	1.29112	1.21678	1.07328	0.7077
Q9PIB4	Cj0388	trpS Cj0388	Tryptophan--tRNA ligase (EC 6.1.1.2) (Tryptophanyl-tRNA synthetase) (TrpRS)	23	23	22	22	1.21128	1.31896	1.35619	1.29787	1.29607	0.0027317	Q9PIB4	Cj0388	19	19	19	1.48096	1.21619	1.03219	1.24311	0.1354
Q9PIB3	Cj0389	serS Cj0389	Serine--tRNA ligase (EC 6.1.1.11) (Seryl-tRNA synthetase) (SerRS) (Seryl-tRNA(Ser/Sec) synthetase)	39	39	35	35	1.3088	1.25683	1.27805	1.25697	1.27516	0.0016043	Q9PIB3	Cj0389	40	39	40	0.772925	1.02033	0.867399	0.886886	0.1917
Q0PBC0	Cj0390	pflB Cj0390	Putative transmembrane protein	26	26	23	23	0.893423	0.85347	0.800663	0.964812	0.878092	0.0785	Q0PBC0	Cj0390	26	23	30	1.19586	0.853437	0.988067	1.01245	0.9065
Q0PBB9	Cj0391c	fedB Cj0391c	Putative uncharacterized protein	18	18	16	16	1.59148	1.47756	1.49709	1.81779	1.59598	0.0018587	Q0PBB9	Cj0391c	9	9	9	2.05256	3.05955	1.23678	2.1163	0.0456
Q0PBB8	Cj0392c	pyk Cj0392c	Pyruvate kinase (EC 2.7.1.40)	57	57	57	57	1.11227	1.01758	1.18143	1.03624	1.08688	0.10886	Q0PBB8	Cj0392c	54	54	54	0.820976	1.33911	0.842489	1.00086	0.9962
P56954	Cj0393c	mqo Cj0393c	Probable malate:quinone oxidoreductase (EC 1.1.5.4) (MQO) (Malate dehydrogenase [quinone])	49	49	45	45	0.746543	0.662908	0.62544	0.598651	0.658386	0.0082434	P56954	Cj0393c	45	45	45	0.622754	0.637603	0.748851	0.669736	0.0012
Q0PBB6	Cj0394c	coaX Cj0394c	Type III pantothenate kinase (EC 2.7.1.33) (PanK-III) (Pantothenic acid kinase)	9	9	8	8	2.28736	1.43543	1.43103	1.61217	1.6915	0.0423	Q0PBB6	Cj0394c	7	7	6	3.07564	1.97208	2.01353	2.35375	0.00071
Q0PBB5	Cj0395c	Cj0395c	Putative uncharacterized protein	ND	ND	ND	ND	ND	ND	ND	ND	ND	ND	Q0PBB5	Cj0395c	ND	3	ND	ND	0.769696	ND	0.769696	ND
Q0PBB4	Cj0396c	Cj0396c	Putative lipoprotein	17	17	15	15	1.08298	1.06812	0.97684	1.04432	1.04306	0.13224	Q0PBB4	Cj0396c	21	21	21	0.99319	1.08743	1.05166	1.04409	0.1837
Q0PBB3	Cj0397c	Cj0397c	Putative uncharacterized protein (TPR_21 domain-containing protein)	7	7	7	7	2.32883	1.2774	2.41285	2.30279	2.08047	0.0276	Q0PBB3	Cj0397c	6	7	6	2.91205	1.77987	1.98591	2.22594	0.01477
Q9PIA5	Cj0398	gatC Cj0398	Glutamyl-tRNA(Gln) amidotransferase subunit C (Glu-ADT subunit C) (EC 6.3.5.-)	13	13	10	10	1.22147	0.961504	1.32642	1.01232	1.13043	0.15788	Q9PIA5	Cj0398	9	10	9	2.32354	0.602886	0.493068	1.13983	0.8251
Q0PBB1	Cj0399	Cj0399	Colicin V production protein homolog	1	1	1	1	0.894395	1.05619	1.0374	0.993529	0.995377	0.93386	Q0PBB1	Cj0399	1	2	2	1.19532	0.989507	1.16682	1.11722	0.1428
P0C631	Cj0400	fur Cj0400	Ferric uptake regulation protein (Ferric uptake regulator)	9	9	8	8	0.944018	0.774557	1.05704	0.765757	0.885344	0.3387	P0C631	Cj0400	13	12	12	0.714419	0.770542	0.601655	0.695539	0.0036
P41258	Cj0401	lysS Cj0401	Lysine--tRNA ligase (EC 6.1.1.6) (Lysyl-tRNA synthetase) (LysRS)	45	45	45	45	1.14155	1.11758	1.15173	1.20623	1.15427	0.0027431	P41258	Cj0401	36	36	36	0.784316	0.671537	0.651997	0.702617	0.002
P24531	Cj0402	glyA Cj0402	Serine hydroxymethyltransferase (SHMT) (Serine methylase) (EC 2.1.2.1)	44	44	39	39	0.639442	0.521695	0.707537	0.957611	0.706571	0.1008	P24531	Cj0402	44	44	43	0.603354	0.528997	0.84856	0.660304	0.0245
Q0PBA7	Cj0403	Cj0403	Putative uncharacterized protein (DUF1882 domain-containing protein)	16	16	14	14	0.723168	0.727791	0.734247	0.749242	0.733612	9.6955e-05	Q0PBA7	Cj0403	19	14	16	0.427572	0.838282	0.956825	0.740893	0.1814
Q0PBA6	Cj0404	Cj0404	Putative transmembrane protein	17	17	13	13	0.697046	0.797379	0.774571	0.79396	0.765739	0.0050264	Q0PBA6	Cj0404	25	20	21	0.860937	0.659618	0.52427	0.681608	0.0312
Q0PBA5	Cj0405	aroE Cj0405	Shikimate dehydrogenase (EC 1.1.1.25)	15	15	14	14	1.16892	1.08154	1.21559	1.11725	1.14582	0.029079	Q0PBA5	Cj0405	17	15	15	1.18505	1.02203	1.2141	1.14039	0.0786
Q0PBA4	Cj0406c	Cj0406c	Putative lipoprotein	21	20	20	19	0.597091	0.812053	0.723933	0.824736	0.739453	0.0297	Q0PBA4	Cj0406c	15	15	15	0.816416	0.755301	0.6712	0.747639	0.0039
Q0PBA2	Cj0408	frdC Cj0408	Fumarate reductase cytochrome B subunit	4	4	3	3	0.772299	0.831647	1.02155	0.942697	0.892048	0.2664	Q0PBA2	Cj0408	8	7	8	0.908178	0.808646	0.99173	0.902852	0.1403
Q0PBA1	Cj0409	frdA Cj0409	Fumarate reductase flavoprotein subunit (EC 1.3.99.1)	88	87	85	84	1.06595	1.11992	1.08849	1.15647	1.10771	0.0217	Q0PBA1	Cj0409	103	99	102	1.01534	0.77647	0.742531	0.844781	0.1448
Q0PBA0	Cj0410	frdB Cj0410	Fumarate reductase iron-sulfur protein (EC 1.3.99.1)	23	23	23	23	0.814985	1.06883	0.719424	0.722295	0.831385	0.1326	Q0PBA0	Cj0410	27	24	29	0.522339	0.717197	0.763301	0.667612	0.0108
Q0PB99	Cj0411	Cj0411	Putative ATP/GTP binding protein	31	31	37	37	0.989714	0.969867	0.96072	1.04025	0.990138	0.94037	Q0PB99	Cj0411	34	34	33	1.01279	1.22339	1.00594	1.08071	0.3213
Q0PB98	Cj0412	Cj0412	Putative ATP/GTP binding protein	18	18	15	15	0.898832	0.908499	0.963148	0.873595	0.911018	0.0347	Q0PB98	Cj0412	25	25	22	0.873595	0.867072	1.02772	0.922794	0.2153
Q0PB97	Cj0413	Cj0413	Putative periplasmic protein (Beta-lactamase-like protein (EC 3.5.2.6))	19	19	14	14	1.14314	0.950798	1.23488	1.06411	1.09823	0.3383	Q0PB97	Cj0413	20	21	22	1.01025	1.44239	0.696028	1.04956	0.8301
Q0PB96	Cj0414	gdhA Cj0414	Putative oxidoreductase subunit	25	25	20	20	1.34922	1.12813	1.18333	1.30124	1.24048	0.0351	Q0PB96	Cj0414	25	24	24	1.28825	1.27267	1.34462	1.30185	0.0002
Q0PB95	Cj0415	gdhB Cj0415	Putative GMC oxidoreductase subunit	48	48	45	45	0.911473	0.966604	0.900265	0.921586	0.924982	0.0263	Q0PB95	Cj0415	53	53	53	1.88241	1.00509	0.663156	1.18355	0.6398
Q0PB92	Cj0418c	Cj0418c	Putative uncharacterized protein	3	3	3	3	1.06839	1.05158	0.912699	0.945121	0.994448	0.97778	Q0PB92	Cj0418c	ND	ND	ND	ND	ND	ND	ND	ND
Q0PB91	Cj0419	Cj0419	Putative histidine triad (HIT) family protein	11	11	11	11	1.12274	1.0284	1.08162	0.962555	1.04883	0.21827	Q0PB91	Cj0419	7	7	7	1.01486	1.31162	0.724677	1.01705	0.9247
Q0PB90	Cj0420	Cj0420	Putative periplasmic protein	33	33	32	32	0.918508	0.834023	1.09655	0.946361	0.948861	0.43356	Q0PB90	Cj0420	33	33	34	1.18829	0.923147	0.87892	0.996786	0.9751
Q0PB88	Cj0422c	Cj0422c	Putative H-T-H containing protein	2	2	2	2	1.26636	1.02032	1.13231	1.05859	1.1194	0.10591	Q0PB88	Cj0422c	ND	ND	ND	ND	ND	ND	ND	ND
Q0PB86	Cj0424	Cj0424	Putative acidic periplasmic protein	6	6	4	4	1.35173	1.08806	1.26234	1.29345	1.24889	0.043	Q0PB86	Cj0424	5	4	5	0.857758	ND	ND	0.857758	ND
Q0PB85	Cj0425	Cj0425	Putative periplasmic protein	5	5	7	7	1.3286	1.20057	1.25364	1.15364	1.23411	0.029496	Q0PB85	Cj0425	ND	ND	ND	ND	ND	ND	ND	ND
Q0PB84	Cj0426	Cj0426	Putative ABC transporter ATP-binding protein	45	44	42	41	1.22861	1.18836	1.18236	1.15784	1.18929	0.0090753	Q0PB84	Cj0426	37	34	36	1.2828	0.947513	0.874079	1.0348	0.7958
Q0PB83	Cj0427	Cj0427	Putative uncharacterized protein (Phage protein)	10	10	9	9	0.89119	0.4741	0.538699	0.381895	0.571471	0.0622	Q0PB83	Cj0427	10	9	10	0.672446	0.491115	0.337807	0.500456	0.0067
Q0PB81	Cj0429c	Cj0429c	Putative uncharacterized protein (UPF0029 domain-containing protein)	10	10	12	12	1.43612	1.12232	1.21749	1.16986	1.23645	0.031988	Q0PB81	Cj0429c	4	4	4	2.43303	1.14565	0.935728	1.5048	0.3415
Q0PB80	Cj0430	Cj0430	Putative integral membrane protein	ND	ND	1	1	ND	ND	1.00857	0.903633	0.956101	ND	Q0PB80	Cj0430	ND	ND	ND	ND	ND	ND	ND	ND
Q9PI73	Cj0432c	murD Cj0432c	UDP-N-acetylmuramoylalanine--D-glutamate ligase (EC 6.3.2.9) (D-glutamic acid-adding enzyme) (UDP-N-acetylmuramoyl-L-alanyl-D-glutamate synthetase)	29	29	26	26	1.34626	1.38335	1.82129	2.02923	1.64503	0.0040087	Q9PI73	Cj0432c	19	19	19	2.28651	1.58499	2.01826	1.96325	0.0355
Q9PI72	Cj0433c	mraY Cj0433c	Phospho-N-acetylmuramoyl-pentapeptide-transferase	ND	ND	4	4	ND	ND	0.903625	1.09253	0.998078	ND	Q9PI72	Cj0433c	ND	4	4	ND	1.5885	1.64619	1.61735	0.00104
Q9PI71	Cj0434	gpmI pgm Cj0434	2,3-bisphosphoglycerate-independent phosphoglycerate mutase (BPG-independent PGAM) (Phosphoglyceromutase) (iPGM) (EC 5.4.2.1)	51	51	53	53	1.36006	1.21449	1.32235	1.2442	1.28527	0.0064247	Q9PI71	Cj0434	41	41	41	1.51177	1.25589	0.980565	1.24941	0.1793
Q0PB75	Cj0435	fabG Cj0435	3-oxoacyl-[acyl-carrier protein] reductase (EC 1.1.1.100)	22	22	19	19	1.05103	1.02527	1.15423	1.04856	1.06977	0.1809	Q0PB75	Cj0435	19	18	18	1.0062	1.26093	0.897555	1.05489	0.6371
Q0PB74	Cj0436	Cj0436	Putative pyridoxamine 5'-phosphate oxidase (EC 1.4.3.5)	13	13	12	12	1.27157	1.15488	1.24266	1.13811	1.20181	0.013136	Q0PB74	Cj0436	13	13	14	0.676042	0.837436	1.01408	0.84252	0.182
Q0PB73	Cj0437	mfrA sdhA Cj0437	Periplasmic methylmenaquinone:fumarate reductase flavoprotein subunit (EC 1.3.99.1)	40	39	41	40	1.83402	1.66317	1.38968	1.63049	1.62934	0.0029437	Q0PB73	Cj0437	58	54	57	1.58573	2.35155	1.90614	1.9478	0.013
Q0PB72	Cj0438	mfrB sdhB Cj0438	Periplasmic methylmenaquinone:fumarate reductase iron-sulfur protein (EC 1.3.5.1)	23	23	23	23	1.77947	1.69555	1.43708	1.4492	1.59032	0.0017552	Q0PB72	Cj0438	28	23	23	1.56003	1.72791	1.57319	1.62038	0.00037
Q0PB71	Cj0439	mfrC sdhC Cj0439	Periplasmic methylmenaquinone:fumarate reductase subunit C (EC 1.3.99.1)	22	22	22	22	1.38525	1.44478	1.80791	1.45179	1.52243	ND	Q0PB71	Cj0439	23	23	22	2.32763	1.44063	1.28989	1.68605	0.01014
Q0PB70	Cj0440c	Cj0440c	Aminopyrimidine aminohydrolase (EC 3.5.99.2)	10	10	10	10	0.934517	0.927095	0.906081	1.02565	0.948336	0.29005	Q0PB70	Cj0440c	9	9	9	1.95611	1.22948	0.871678	1.35242	0.3313
Q9PI64	Cj0441	acpP Cj0441	Acyl carrier protein (ACP)	7	7	11	11	0.584035	0.855041	0.716089	0.961761	0.779232	0.148	Q9PI64	Cj0441	7	7	7	0.68493	1.01864	1.05905	0.920875	0.541
Q0PB68	Cj0442	fabF Cj0442	3-oxoacyl-[acyl-carrier-protein] synthase 2 (EC 2.3.1.179)	36	36	30	30	1.06812	1.01864	1.14828	1.02808	1.06578	0.2115	Q0PB68	Cj0442	24	24	24	0.763776	0.836589	1.00216	0.867507	0.1335
Q9PI62	Cj0443	accA Cj0443	Acetyl-coenzyme A carboxylase carboxyl transferase subunit alpha (ACCase subunit alpha) (Acetyl-CoA carboxylase carboxyltransferase subunit alpha) (EC 6.4.1.2)	31	31	31	31	1.19109	1.0765	1.03434	1.00091	1.07571	0.2903	Q9PI62	Cj0443	29	29	31	0.822757	0.896695	0.966988	0.89548	0.0661
Q0PB66	Cj0447	Cj0447	Putative NUDIX hydrolase family protein	13	13	10	10	1.26896	1.09246	1.38461	0.99832	1.18609	0.19143	Q0PB66	Cj0447	1	4	9	1.06145	1.0415	0.956604	1.01985	0.5703
Q0PB65	Cj0448c	tlp6 Cj0448c	Putative MCP-type signal transduction protein	46	44	45	43	1.19412	1.13821	1.22632	1.28595	1.21115	0.0103	Q0PB65	Cj0448c	46	45	46	1.80114	1.07558	1.06229	1.31301	0.269
Q0PB64	Cj0449c	Cj0449c	Putative uncharacterized protein (DUF465 domain-containing protein)	7	7	8	8	0.356359	1.28071	0.324806	1.27397	0.80896	0.6623	Q0PB64	Cj0449c	9	8	9	1.35561	0.972069	1.17849	1.16872	0.2026
Q9PI58	Cj0450c	rpmB Cj0450c	50S ribosomal protein L28	9	9	8	8	1.06365	1.09047	1.10735	1.09365	1.08878	0.0016043	Q9PI58	Cj0450c	12	10	12	1.52252	0.755301	0.351252	0.876357	0.7371
Q0PB62	Cj0451	rep Cj0451	Ribulose-phosphate 3-epimerase (EC 5.1.3.1)	12	12	13	13	1.12048	2.23633	2.7074	3.27298	2.3343	0.0614	Q0PB62	Cj0451	4	4	4	1.90331	1.87809	2.66136	2.14759	0.0407
Q0PB61	Cj0452	dnaQ Cj0452	Exonuclease, dna polymerase III epsilon subunit (EC 2.7.7.7)	14	14	17	17	1.25778	1.22667	1.19966	1.26926	1.23834	0.0064247	Q0PB61	Cj0452	6	8	6	2.09182	1.25234	0.840681	1.39495	0.3438
Q9PI55	Cj0453	thiC Cj0453	Phosphomethylpyrimidine synthase (EC 4.1.99.17) (Hydroxymethylpyrimidine phosphate synthase) (HMP-P synthase) (HMP-phosphate synthase) (HMPP synthase) (Thiamine biosynthesis protein ThiC)	41	41	42	42	0.566465	0.513194	0.748097	0.704955	0.633178	0.01181	Q9PI55	Cj0453	47	46	41	0.653875	0.685021	0.746991	0.695296	0.0004
Q0PB59	Cj0454c	Cj0454c	Putative membrane protein	7	7	4	4	0.77989	0.828194	0.760316	0.861375	0.807444	0.01029	Q0PB59	Cj0454c	ND	4	8	ND	0.701109	0.521192	0.61115	0.0102
Q0PB58	Cj0455c	Cj0455c	Putative membrane protein	3	3	4	4	1.03547	1.20724	0.927717	1.02199	1.0481	0.41233	Q0PB58	Cj0455c	ND	1	2	ND	2.41239	1.16667	1.16667	ND
Q0PB57	Cj0456c	Cj0456c	Putative uncharacterized protein (Clan AA aspartic protease)	1	1	1	1	0.93787	1.19777	0.90372	1.04214	1.02037	0.65491	Q0PB57	Cj0456c	ND	4	4	ND	0.655384	0.758898	0.707141	0.047
Q0PB56	Cj0457c	Cj0457c	Putative lipoprotein	6	6	4	4	0.804887	0.823852	0.703454	0.750276	0.770617	0.022965	Q0PB56	Cj0457c	ND	3	ND	ND	1.41661	ND	1.41661	ND
Q0PB55	Cj0458c	miaB Cj0458c	(Dimethylallyl)adenosine tRNA methylthiotransferase MiaB (EC 2.-.-.-) (tRNA-i(6)A37 methylthiotransferase)	33	33	30	30	1.18533	1.12806	1.19221	1.1685	1.16852	0.0074298	Q0PB55	Cj0458c	29	33	29	0.903402	1.21648	0.985617	1.03517	0.7265
Q0PB54	Cj0459c	Cj0459c	Putative uncharacterized protein (HP0268 domain-containing protein)	13	13	14	14	0.89961	0.911044	0.9345	0.881653	0.906702	0.26996	Q0PB54	Cj0459c	13	13	13	0.821751	1.09654	1.16955	1.02928	0.7958
Q0PB53	Cj0460	nusA Cj0460	Transcription termination factor NusA	40	40	37	37	1.12787	1.18065	1.11084	1.15583	1.1438	0.00341	Q0PB53	Cj0460	41	41	41	1.38901	0.961061	0.846364	1.06548	0.7119
Q0PB51	Cj0462	Cj0462	Cyclic dehypoxanthine futalosine synthase (Cyclic DHFL synthase) (EC 1.21.98.1) (Dehypoxanthine futalosine cyclase) (DHFL cyclase) (Menaquinone biosynthetic enzyme MqnC)	28	28	26	26	1.1063	1.06932	1.21134	1.09132	1.11957	0.051085	Q0PB51	Cj0462	20	24	21	1.25995	0.92792	1.34464	1.1775	0.2352
Q0PB50	Cj0463	Cj0463	Zinc protease-like protein	28	28	29	29	0.895571	0.917157	0.86767	0.924881	0.90132	0.032077	Q0PB50	Cj0463	32	29	31	1.05312	0.841669	1.00056	0.965118	0.6123
Q0PB49	Cj0464	recG Cj0464	ATP-dependent DNA helicase (EC 3.6.1.-)	8	8	6	6	1.01112	1.0694	0.968324	0.982592	1.00786	0.79184	Q0PB49	Cj0464	17	14	15	1.51652	1.71706	1.32093	1.51817	0.0106
Q0PB48	Cj0465c	ctb Cj0465c	Group 3 truncated hemoglobin ctb (Cj-trHbP) (Truncated Hb)	8	8	8	8	1.08704	1.00484	1.21427	1.01156	1.07943	0.3376	Q0PB48	Cj0465c	2	2	2	0.906387	1.04235	1.06071	1.00315	0.9515
Q0PB47	Cj0466	nssR Cj0466	Transcriptional regulator	18	18	14	14	0.943115	0.968812	0.928857	0.938616	0.94485	0.25888	Q0PB47	Cj0466	9	8	8	1.45468	1.33956	1.43546	1.4099	0.0003
Q0PB46	Cj0467	paqP Cj0467	Amino-acid ABC transporter integral membrane protein	ND	ND	1	1	ND	ND	0.556972	0.807057	0.682015	ND	Q0PB46	Cj0467	ND	ND	ND	ND	ND	ND	ND	ND
Q0PB44	Cj0469	paqQ Cj0469	Amino-acid ABC transporter ATP-binding protein	13	12	14	13	0.836152	0.919598	0.91681	0.823885	0.874111	0.0305	Q0PB44	Cj0469	15	14	13	1.08315	0.695182	0.820519	0.866284	0.307
O69303	Cj0470	tuf tufB Cj0470	Elongation factor Tu (EF-Tu)	46	46	46	46	1.27285	1.20686	1.32502	1.22762	1.25809	0.0093118	O69303	Cj0470	57	57	56	1.15189	0.840253	0.712117	0.901419	0.4923
Q9PI38	Cj0471	rpmG Cj0471	50S ribosomal protein L33	6	6	9	9	0.765302	0.821737	0.825731	0.874167	0.821734	0.091469	Q9PI38	Cj0471	11	10	11	0.890716	0.567322	0.544226	0.667422	0.041
Q0PB41	Cj0472	secE Cj0472	Preprotein translocase SecE subunit	1	1	2	2	0.811234	0.92954	0.559573	0.65054	0.605056	0.1012	Q0PB41	Cj0472	ND	ND	ND	ND	ND	ND	ND	ND
Q9PI36	Cj0473	nusG Cj0473	Transcription termination/antitermination protein NusG	21	21	21	21	1.62072	1.41629	1.52365	1.31741	1.46952	0.0029827	Q9PI36	Cj0473	15	15	15	1.67923	1.03829	1.52165	1.41306	0.0989
Q9PI35	Cj0474	rplK Cj0474	50S ribosomal protein L11	18	18	17	17	1.04662	1.15323	1.02152	1.12541	1.0867	0.1388	Q9PI35	Cj0474	24	19	21	0.380374	0.610507	0.615819	0.535567	0.0039
Q9PI34	Cj0475	rplA Cj0475	50S ribosomal protein L1	28	28	27	27	0.933943	0.954864	0.943617	0.982846	0.953818	0.27645	Q9PI34	Cj0475	38	32	34	0.91299	0.858604	0.924104	0.898566	0.0074
Q9PI33	Cj0476	rplJ Cj0476	50S ribosomal protein L10	19	19	17	17	0.858487	0.952158	0.858487	0.874755	0.885972	0.029279	Q9PI33	Cj0476	19	23	23	1.09902	0.817192	0.64607	0.854095	0.3312
Q9PI32	Cj0477	rplL Cj0477	50S ribosomal protein L7/L12	22	22	22	22	0.805538	1.03914	0.932733	1.08968	0.966775	0.68085	Q9PI32	Cj0477	23	23	23	0.989714	0.974647	0.8857	0.95002	0.1984
Q46124	Cj0478	rpoB Cj0478	DNA-directed RNA polymerase subunit beta (RNAP subunit beta) (EC 2.7.7.6) (RNA polymerase subunit beta) (Transcriptase subunit beta)	141	140	133	133	1.0022	1.00002	0.808049	0.688813	0.874769	0.3387	Q46124	Cj0478	171	164	169	0.680545	0.75022	0.670504	0.700423	0.0003
Q9PI30	Cj0479	rpoC Cj0479	DNA-directed RNA polymerase subunit beta' (RNAP subunit beta') (EC 2.7.7.6) (RNA polymerase subunit beta') (Transcriptase subunit beta')	147	146	140	140	1.06362	1.05205	1.08939	1.00988	1.05374	0.0967	Q9PI30	Cj0479	182	175	181	0.811172	0.831508	0.915757	0.852812	0.0101
Q0PB33	Cj0480c	fucR Cj0480c	Putative transcriptional regulator	3	3	4	4	1.12582	1.51502	1.45536	1.23747	1.33341	0.0717	Q0PB33	Cj0480c	7	3	7	1.98706	1.28283	1.26316	1.51102	0.0984
Q0PB32	Cj0481	dapA Cj0481	Putative dihydrodipicolinate synthase (EC 4.2.1.52)	13	13	12	12	1.15446	1.13247	1.02794	0.939944	1.0637	0.4404	Q0PB32	Cj0481	6	4	6	1.18843	1.30074	0.871159	1.12011	0.4033
Q0PB31	Cj0482	uxaA' Cj0482	Putative altronate hydrolase N-terminus (EC 4.2.1.7)	4	4	4	4	1.25776	1.2361	1.48031	1.19838	1.29314	0.03544	Q0PB31	Cj0482	ND	ND	ND	ND	ND	ND	ND	ND
Q0PB30	Cj0483	uxaA' Cj0483	Putative altronate hydrolase C-terminus (EC 4.2.1.7)	4	4	3	3	1.4135	1.39071	1.29884	2.19129	1.57358	ND	Q0PB30	Cj0483	ND	5	ND	ND	2.46997	ND	2.46997	ND
Q0PB29	Cj0484	Cj0484	Putative MFS (Major Facilitator Superfamily) transport protein	2	2	2	2	1.44606	1.47795	1.74321	1.52156	1.54719	0.0028028	Q0PB29	Cj0484	ND	ND	ND	ND	ND	ND	ND	ND
Q0PB28	Cj0485	Cj0485	Putative oxidoreductase	13	13	14	14	0.985869	2.31928	1.36586	0.960921	1.40798	0.2891	Q0PB28	Cj0485	14	14	14	3.3831	2.07863	1.27334	2.24502	0.04999
Q0PB27	Cj0486	fucP Cj0486	Putative sugar transporter	1	1	ND	ND	1.08819	0.897472	ND	ND	0.99283	ND	Q0PB27	Cj0486	ND	ND	2	ND	ND	1.38441	1.38441	ND
Q0PB26	Cj0487	Cj0487	Putative amidohydrolase	6	6	3	3	0.808947	0.734742	0.825643	0.759399	0.782183	0.0047178	Q0PB26	Cj0487	1	ND	ND	1.09108	ND	ND	1.09108	ND
Q0PB25	Cj0488	Cj0488	L-rhamnose mutarotase	4	4	4	4	1.11871	0.938885	1.06842	0.915062	1.01027	0.75653	Q0PB25	Cj0488	ND	4	4	ND	0.629982	0.58435	0.607166	0.0074
Q9PI18	Cj0491	rpsL Cj0491	30S ribosomal protein S12	12	12	12	12	0.676512	0.71441	0.686118	0.828921	0.72649	0.0065	Q9PI18	Cj0491	18	17	14	1.12185	0.626595	0.416082	0.72151	0.2539
Q9PI17	Cj0492	rpsG Cj0492	30S ribosomal protein S7	21	21	21	21	0.772832	0.952697	0.861906	0.966087	0.888381	0.21996	Q9PI17	Cj0492	28	28	28	1.07229	0.69573	0.756148	0.841389	0.2459
Q9PI16	Cj0493	fusA Cj0493	Elongation factor G (EF-G)	90	90	83	83	1.06708	1.02371	0.784596	0.752441	0.906957	0.4849	Q9PI16	Cj0493	91	84	88	0.699364	0.898522	0.673166	0.757017	0.0269
Q0PB19	Cj0494	Cj0494	Putative exporting protein	4	4	3	3	0.911796	0.858385	0.263268	0.272738	0.576547	0.1889	Q0PB19	Cj0494	5	3	ND	0.423375	0.46712	ND	0.445248	0.0016
Q0PB18	Cj0495	Cj0495	Putative methyltransferase domain protein	3	3	4	4	0.942241	1.18623	1.11571	1.28332	1.13187	0.2888	Q0PB18	Cj0495	3	3	3	1.93054	3.62507	2.01357	2.52306	0.0408
Q0PB17	Cj0496	Cj0496	Putative uncharacterized protein	7	7	5	5	1.83329	1.39894	1.63789	1.54071	1.60271	0.0018587	Q0PB17	Cj0496	ND	ND	2	ND	ND	1.67349	1.67349	ND
Q0PB16	Cj0497	Cj0497	Putative lipoprotein	15	15	12	12	1.1284	1.10154	1.0492	1.01054	1.07242	0.1412	Q0PB16	Cj0497	25	25	25	0.71383	0.973762	1.49396	1.06052	0.8049
Q9PI11	Cj0498	trpC Cj0498	Indole-3-glycerol phosphate synthase (IGPS) (EC 4.1.1.48)	19	19	16	16	1.11739	1.04002	1.1369	1.08651	1.0952	0.0397	Q9PI11	Cj0498	15	16	15	0.970995	0.807799	0.984274	0.921023	0.2364
Q0PB14	Cj0499	Cj0499	Putative histidine triad (HIT) family protein	8	8	8	8	1.13961	1.11287	1.4127	1.30591	1.24277	0.036466	Q0PB14	Cj0499	6	7	7	1.58192	0.95344	0.926638	1.154	0.5117
Q0PB13	Cj0500	Cj0500	Putative rhodanese-like domain protein	3	3	5	5	0.940409	0.965488	0.792939	0.919363	0.90455	0.26232	Q0PB13	Cj0500	8	6	8	1.2252	1.26758	0.818673	1.10382	0.5083
Q9PI08	Cj0503c	hemH Cj0503c	Ferrochelatase (EC 4.99.1.1) (Heme synthase) (Protoheme ferro-lyase)	5	5	4	4	0.704461	0.805077	0.756786	0.665172	0.732874	0.0043	Q9PI08	Cj0503c	5	4	5	1.3231	0.657925	0.70849	0.896504	0.6536
Q0PB11	Cj0504c	Cj0504c	Putative oxidoreductase	19	19	20	20	1.28729	1.21818	1.37268	1.36663	1.31119	0.0048	Q0PB11	Cj0504c	16	16	16	1.97401	1.12872	0.905605	1.33611	0.36
Q0PB10	Cj0505c	Cj0505c	Putative aminotransferase (DegT family). Functional classification-Misc	21	21	20	20	1.23847	1.20138	1.23843	1.23827	1.22914	0.0043887	Q0PB10	Cj0505c	15	17	18	1.15344	1.20648	1.5218	1.29391	0.0629
Q9PI05	Cj0506	alaS Cj0506	Alanine--tRNA ligase (EC 6.1.1.7) (Alanyl-tRNA synthetase) (AlaRS)	85	85	86	86	1.08302	1.10224	1.08076	1.12962	1.09891	0.0042195	Q9PI05	Cj0506	86	85	86	1.182	0.937352	0.83944	0.986262	0.8992
Q9PI04	Cj0507	Cj0507	Nucleoside triphosphate pyrophosphatase (EC 3.6.1.9) (Nucleotide pyrophosphatase) (Nucleotide PPase)	14	14	15	15	1.13243	1.06711	1.11355	1.08437	1.09937	0.050864	Q9PI04	Cj0507	8	8	8	1.0072	1.22613	0.991544	1.07496	0.3783
Q0PB07	Cj0508	pbpA Cj0508	Penicillin-binding protein	26	26	27	27	0.868824	0.884822	0.874665	0.883231	0.877886	9.6955e-05	Q0PB07	Cj0508	39	36	37	0.759254	1.24758	0.794797	0.933877	0.6956
Q9PI02	Cj0509c	clpB Cj0509c	Chaperone protein ClpB	88	87	83	82	1.32616	1.2536	1.31038	1.32546	1.3039	0.0003803	Q9PI02	Cj0509c	86	86	86	0.906832	1.16851	1.16721	1.08085	0.4054
Q0PB05	Cj0510c	Cj0510c	Putative uncharacterized protein (Metal-sensing transcriptional repressor)	3	3	1	1	1.09329	1.1418	1.05979	1.07157	1.09161	0.028	Q0PB05	Cj0510c	ND	2	2	ND	1.07283	1.58976	1.33129	0.3284
Q0PB04	Cj0511	Cj0511	Putative secreted protease	47	47	44	44	1.14492	1.06349	1.05535	1.03044	1.07355	0.084166	Q0PB04	Cj0511	48	44	47	0.948367	0.839129	0.937018	0.908171	0.0571
Q9PHZ9	Cj0512	purC Cj0512	Phosphoribosylaminoimidazole-succinocarboxamide synthase (EC 6.3.2.6) (SAICAR synthetase)	37	37	37	37	1.22929	1.06014	1.29519	1.10131	1.17148	0.105	Q9PHZ9	Cj0512	27	28	27	0.871837	0.900095	0.92066	0.897531	0.0191
Q0PB02	Cj0513	purS Cj0513	Phosphoribosylformylglycinamidine (FGAM) synthase	8	8	7	7	1.3138	0.966761	1.59631	1.06007	1.23424	0.15902	Q0PB02	Cj0513	7	6	ND	0.878926	0.923926	ND	0.901426	0.0484
Q9PHZ7	Cj0514	purQ Cj0514	Phosphoribosylformylglycinamidine synthase 1 (EC 6.3.5.3) (Phosphoribosylformylglycinamidine synthase I) (FGAM synthase I)	9	9	9	9	0.903626	0.873349	0.871081	0.833919	0.870494	0.0064247	Q9PHZ7	Cj0514	10	10	10	1.57463	1.03303	1.01781	1.20849	0.3185
Q0PB00	Cj0515	Cj0515	Putative periplasmic protein	9	9	10	10	0.863288	0.882577	0.68905	0.714965	0.78747	0.0466	Q0PB00	Cj0515	16	14	14	2.05887	2.21745	1.65805	1.97812	0.0042
Q0PAZ9	Cj0516	plsC Cj0516	Putative 1-acyl-SN-glycerol-3-phosphate acyltransferase (EC 2.3.1.51)	7	7	7	7	0.933346	0.868621	0.850984	0.84477	0.87443	0.015609	Q0PAZ9	Cj0516	11	7	11	0.603349	1.06775	1.1988	0.956635	0.8221
Q9PHZ3	Cj0518	htpG Cj0518	Chaperone protein HtpG (Heat shock protein HtpG) (High temperature protein G)	58	58	57	57	1.4784	1.2049	1.39003	1.16624	1.30989	0.049	Q9PHZ3	Cj0518	62	63	61	0.79171	1.02287	1.03074	0.948442	0.5467
Q0PAZ6	Cj0519	Cj0519	Putative rhodanese-like domain protein	8	8	8	8	1.17584	1.21552	1.32302	1.16956	1.22098	0.0143	Q0PAZ6	Cj0519	4	5	4	1.81058	1.60344	0.678259	1.36409	0.3546
Q0PAZ5	Cj0520	Cj0520	Putative membrane protein	ND	ND	ND	ND	ND	ND	ND	ND	ND	ND	Q0PAZ5	Cj0520	4	3	4	1.01185	0.718891	0.513534	0.748093	0.2236
Q0PAZ1	Cj0525c	pbpB Cj0525c	Putative penicillin-binding protein	24	24	19	19	1.14072	1.82709	1.00789	1.24558	1.30532	0.1895	Q0PAZ1	Cj0525c	42	38	39	1.38198	1.20323	1.43018	1.33846	0.0081
Q9PHY8	Cj0526c	fliE Cj0526c	Flagellar hook-basal body complex protein FliE	8	8	9	9	1.12219	0.976926	1.11409	1.05509	1.06707	0.2536	Q9PHY8	Cj0526c	7	7	7	1.68937	0.850137	0.707113	1.08221	0.8017
Q0PAY9	Cj0527c	flgC Cj0527c	Flagellar basal-body rod protein FlgC	ND	6	5	5	ND	1.89365	1.43364	1.69505	1.67411	0.0369	Q0PAY9	Cj0527c	6	5	5	5.50109	1.41746	1.22448	2.71434	0.2683
Q0PAY8	Cj0528c	flgB Cj0528c	Flagellar basal body rod protein FlgB	1	1	1	1	0.52841	0.60825	1.06784	1.99542	1.04998	0.89124	Q0PAY8	Cj0528c	ND	3	4	ND	1.73922	3.04933	2.39428	0.0486
Q0PAY7	Cj0529c	Cj0529c	Endolytic murein transglycosylase (EC 4.2.2.-) (Peptidoglycan polymerization terminase)	10	10	10	10	1.51806	1.05411	1.19383	1.44979	1.30394	0.0686	Q0PAY7	Cj0529c	14	14	14	1.86448	1.45105	1.9671	1.76088	0.00851
Q0PAY6	Cj0530	Cj0530	Putative periplasmic protein	33	33	34	34	0.874985	0.902664	0.876859	0.883703	0.884553	0.024832	Q0PAY6	Cj0530	33	33	33	1.09402	1.04743	1.10611	1.08252	0.0091
Q0PAY5	Cj0531	icd Cj0531	Isocitrate dehydrogenase (EC 1.1.1.42)	112	112	105	104	0.233572	0.871658	0.749835	0.657081	0.628036	0.1482	Q0PAY5	Cj0531	109	105	109	0.665886	0.503434	0.670335	0.613219	0.0021
Q9PHY2	Cj0532	mdh Cj0532	Probable malate dehydrogenase (EC 1.1.1.37)	25	25	21	21	0.288232	0.91306	0.821082	0.599993	0.655592	0.1738	Q9PHY2	Cj0532	19	19	19	0.289831	0.585951	0.553881	0.476554	0.0051
Q9PHY1	Cj0533	sucC Cj0533	Succinyl-CoA ligase [ADP-forming] subunit beta (EC 6.2.1.5) (Succinyl-CoA synthetase subunit beta) (SCS-beta)	49	49	47	47	0.970709	0.896449	1.00007	0.723748	0.897744	0.17492	Q9PHY1	Cj0533	46	46	46	0.813779	0.768002	0.757513	0.779765	0.002
Q0PAY2	Cj0534	sucD Cj0534	Succinyl-CoA ligase [ADP-forming] subunit alpha (EC 6.2.1.5)	31	31	31	31	0.70927	0.531568	0.57693	0.409634	0.55685	0.005674	Q0PAY2	Cj0534	27	31	30	0.564722	0.496195	0.368829	0.476582	0.00084
Q0PAY1	Cj0535	oorD Cj0535	OORD subunit of 2-oxoglutarate:acceptor oxidoreductase	10	10	9	9	0.98618	0.738696	0.322351	0.223232	0.567615	0.0942	Q0PAY1	Cj0535	6	7	6	0.667434	0.365796	0.174157	0.402462	0.0141
Q0PAY0	Cj0536	oorA Cj0536	OORA subunit of 2-oxoglutarate:acceptor oxidoreductase	25	25	25	25	0.640258	0.471288	0.550864	0.404767	0.516794	0.003247	Q0PAY0	Cj0536	30	28	25	0.646558	0.563935	0.454003	0.554832	0.00134
Q0PAX9	Cj0537	oorB Cj0537	OORB subunit of 2-oxoglutarate:acceptor oxidoreductase	28	28	26	26	0.86899	0.571685	0.683801	0.361705	0.621545	0.0762	Q0PAX9	Cj0537	34	31	32	0.567204	0.678247	0.355771	0.533741	0.0079
Q0PAX8	Cj0538	oorC Cj0538	OORC subunit of 2-oxoglutarate:acceptor oxidoreductase	18	18	15	15	1.12134	0.278162	0.715949	0.415403	0.632714	0.2601	Q0PAX8	Cj0538	15	15	15	0.405898	0.61474	0.368518	0.463052	0.0022
Q0PAX7	Cj0539	Cj0539	Putative uncharacterized protein (DUF2018 family protein)	9	9	9	9	0.746401	1.12566	0.671163	1.09151	0.908683	0.43669	Q0PAX7	Cj0539	ND	2	5	ND	1.86962	0.545983	1.2078	0.7019
Q0PAX6	Cj0540	Cj0540	Putative exporting protein	5	5	6	6	1.55243	1.43618	1.32679	1.3285	1.41097	0.0092561	Q0PAX6	Cj0540	5	3	ND	2.67808	1.23795	ND	1.95802	0.1723
Q0PAX5	Cj0541	Cj0541	Polyprenyl synthetase (EC 2.5.1.-)	25	25	24	24	1.05426	1.13341	1.07998	1.04713	1.0787	0.0551	Q0PAX5	Cj0541	14	14	14	1.28876	1.06542	0.754454	1.03621	0.8267
Q9PHX2	Cj0542	hemA Cj0542	Glutamyl-tRNA reductase (GluTR) (EC 1.2.1.70)	22	22	18	18	1.09273	1.04836	1.10706	1.07442	1.08064	0.0132	Q9PHX2	Cj0542	19	19	19	0.867356	1.23582	0.938732	1.01397	0.9074
Q9PHX1	Cj0543	proS Cj0543	Proline--tRNA ligase (EC 6.1.1.15) (Prolyl-tRNA synthetase) (ProRS)	48	48	51	51	1.39895	1.25248	1.43474	1.25955	1.33643	0.0034443	Q9PHX1	Cj0543	51	51	50	0.997361	0.949239	0.983066	0.976555	0.1757
Q0PAX2	Cj0544	Cj0544	Putative integral membrane protein	ND	ND	ND	ND	ND	ND	ND	ND	ND	ND	Q0PAX2	Cj0544	ND	1	1	ND	1.3404	2.13748	1.73894	0.2049
Q9PHW9	Cj0545	hemC Cj0545	Porphobilinogen deaminase (PBG) (EC 2.5.1.61) (Hydroxymethylbilane synthase) (HMBS) (Pre-uroporphyrinogen synthase)	42	42	40	40	1.23279	1.12731	1.20788	1.0651	1.15827	0.0513	Q9PHW9	Cj0545	29	30	30	1.03169	0.977561	1.02457	1.01127	0.5431
Q0PAX0	Cj0546	ubiD Cj0546	Putative 3-octaprenyl-4-hydroxybenzoate carboxy-lyase (EC 4.1.1.-)	34	34	35	35	1.12567	1.10559	1.00905	1.12601	1.09158	0.094	Q0PAX0	Cj0546	34	35	36	1.61768	0.757268	0.864532	1.07983	0.7828
Q0PAW9	Cj0547	flaG Cj0547	Flagellar protein	16	16	14	14	1.19952	1.15152	1.45264	1.32416	1.28196	0.026576	Q0PAW9	Cj0547	10	10	10	2.24427	1.24129	2.31135	1.9323	0.0444
Q9PHW6	Cj0548	fliD Cj0548	Flagellar hook-associated protein 2 (HAP2) (Filament cap protein) (Flagellar cap protein)	33	33	26	26	1.29635	1.38019	1.42818	1.49552	1.40006	0.0092496	Q9PHW6	Cj0548	22	22	22	1.56368	2.93196	1.96227	2.15264	0.0471
Q0PAW7	Cj0549	fliS Cj0549	Flagellar protein	10	10	7	7	1.15742	1.27463	0.938719	1.03124	1.1005	0.4126	Q0PAW7	Cj0549	5	3	ND	0.983077	0.591808	ND	0.787442	0.241
Q0PAW6	Cj0550	Cj0550	Putative uncharacterized protein (DUF2508 family protein)	7	7	6	6	1.18616	1.34004	1.24288	1.57439	1.33587	0.0591	Q0PAW6	Cj0550	ND	4	5	ND	1.82967	1.07537	1.45252	0.2058
Q9PHW3	Cj0551	efp Cj0551	Elongation factor P (EF-P)	22	22	19	19	1.35517	1.31955	1.40628	1.28612	1.34178	0.0032342	Q9PHW3	Cj0551	18	18	18	1.46667	1.17985	1.09823	1.24825	0.0904
Q0PAW4	Cj0552	Cj0552	Putative membrane protein	5	5	3	3	0.543914	0.641267	0.660627	0.882688	0.682124	0.049296	Q0PAW4	Cj0552	ND	5	3	ND	1.0686	0.39738	0.732989	0.5097
Q0PAW2	Cj0554	Cj0554	Putative uncharacterized protein (DUF2891 domain-containing protein)	30	30	30	30	1.02216	1.11244	1.02005	1.1108	1.06636	0.1657	Q0PAW2	Cj0554	16	16	16	1.57542	0.819654	0.971961	1.12235	0.6241
Q0PAW0	Cj0556	Cj0556	Putative amidohydrolase family protein	22	22	18	18	0.83669	0.850411	0.849374	0.883806	0.85507	0.018396	Q0PAW0	Cj0556	15	14	15	1.47277	0.540226	0.861384	0.958127	0.8857
Q0PAV9	Cj0557c	Cj0557c	Putative integral membrane protein	ND	ND	1	1	ND	ND	0.715518	0.71705	0.716284	ND	Q0PAV9	Cj0557c	ND	ND	ND	ND	ND	ND	ND	ND
P53000	Cj0558c	proA Cj0558c	Gamma-glutamyl phosphate reductase (GPR) (EC 1.2.1.41) (Glutamate-5-semialdehyde dehydrogenase) (Glutamyl-gamma-semialdehyde dehydrogenase) (GSA dehydrogenase)	20	20	20	20	1.16082	1.00352	1.02996	0.958758	1.03827	0.24787	P53000	Cj0558c	20	20	20	1.03526	0.986464	1.02821	1.01665	0.3358
Q0PAV7	Cj0559	Cj0559	Putative pyridine nucleotide-disulphide oxidoreductase	46	46	42	42	0.423613	0.679998	0.796754	0.753864	0.663557	0.0549	Q0PAV7	Cj0559	42	42	42	0.682215	0.718891	0.635003	0.678703	0.0002
Q0PAV5	Cj0561c	Cj0561c	Putative periplasmic protein	2	2	11	11	1.21912	2.70788	1.37829	2.31067	1.90399	0.087	Q0PAV5	Cj0561c	11	11	11	1.90966	2.11518	1.86279	1.96254	0.002444
Q0PAV4	Cj0562	dnaB Cj0562	Replicative DNA helicase (EC 3.6.1.-)	17	17	16	16	0.981435	0.922895	1.01924	1.01246	0.984008	0.88346	Q0PAV4	Cj0562	22	20	22	1.06551	1.26146	1.14904	1.15867	0.0491
Q9PHU4	Cj0572	ribB Cj0572	3,4-dihydroxy-2-butanone 4-phosphate synthase (DHBP synthase) (EC 4.1.99.12)	33	33	30	30	0.938926	1.08304	1.09939	1.1186	1.05999	0.3846	Q9PHU4	Cj0572	28	30	28	1.18655	0.865378	0.726425	0.926116	0.6164
Q0PAU4	Cj0573	Cj0573	Putative GatB/Yqey family protein	31	31	32	32	1.34807	1.20011	1.37429	1.16121	1.27092	0.0145	Q0PAU4	Cj0573	18	18	18	1.45617	1.38528	0.944028	1.26183	0.1775
Q0PAU3	Cj0574	ilvI Cj0574	Acetolactate synthase large subunit (EC 2.2.1.6)	29	29	27	27	1.19256	1.18805	1.11449	1.0594	1.13862	0.0443	Q0PAU3	Cj0574	20	20	20	1.19815	1.11988	1.16804	1.16202	0.021
Q0PAU2	Cj0575	ilvH Cj0575	Acetolactate synthase small subunit (EC 2.2.1.6)	15	14	13	12	1.25892	1.0384	1.21258	1.13407	1.16099	0.0904	Q0PAU2	Cj0575	11	9	10	0.795867	0.910561	1.04574	0.917388	0.3164
Q9PHU0	Cj0576	lpxD Cj0576	UDP-3-O-acylglucosamine N-acyltransferase (EC 2.3.1.-)	18	18	16	16	0.970338	1.01894	1.04317	0.939237	0.99292	0.93356	Q9PHU0	Cj0576	20	18	20	0.86353	1.06026	0.835818	0.919869	0.3201
Q9PHT9	Cj0577c	queA Cj0577c	S-adenosylmethionine:tRNA ribosyltransferase-isomerase (EC 2.4.99.17) (Queuosine biosynthesis protein QueA)	9	9	5	5	1.25324	2.06245	1.69956	1.68735	1.67565	0.29736	Q9PHT9	Cj0577c	5	5	5	1.74173	2.11999	1.58935	1.81703	0.00667
Q9PHT7	Cj0579c	tatB Cj0579c	Sec-independent protein translocase protein TatB	7	7	4	4	0.841071	0.800687	0.81918	0.763456	0.806098	0.0014	Q9PHT7	Cj0579c	16	16	16	1.40104	0.81542	0.692274	0.969578	0.8961
Q0PAT7	Cj0580c	hemN Cj0580c	Putative oxygen-independent coproporphyrinogen III oxidase (EC 1.3.99.22)	1	1	4	4	0.94389	1.056	1.67525	2.8134	1.62214	0.1603	Q0PAT7	Cj0580c	5	4	5	1.05635	2.8676	1.77309	1.89902	0.163
Q9PHT5	Cj0581	rppH nudH Cj0581	RNA pyrophosphohydrolase (EC 3.6.1.-) ((Di)nucleoside polyphosphate hydrolase)	3	3	2	2	1.14977	1.05401	1.18148	1.17981	1.14127	0.063921	Q9PHT5	Cj0581	7	3	7	1.92257	1.00848	1.1936	1.37488	0.2502
Q0PAT5	Cj0582	lysC Cj0582	Aspartokinase (EC 2.7.2.4)	27	27	30	30	1.14262	1.08454	1.20164	1.12255	1.13784	0.019682	Q0PAT5	Cj0582	31	30	31	0.990372	1.00509	1.06369	1.01972	0.4283
Q0PAT4	Cj0583	Cj0583	DnaA-binding chromosome replication initiation factor	8	8	9	9	1.08531	1.16725	1.193	1.11974	1.14133	0.031927	Q0PAT4	Cj0583	5	5	5	0.833306	1.42	0.851015	1.03477	0.8656
Q0PAT3	Cj0584	Cj0584	DNA polymerase III subunit delta	8	8	7	7	0.815817	0.896036	0.979564	0.933279	0.906174	0.1451	Q0PAT3	Cj0584	5	5	5	1.48503	0.664699	1.25977	1.1365	0.6067
Q0PAT2	Cj0585	folP Cj0585	Dihydropteroate synthase (EC 2.5.1.15)	17	17	15	15	1.20361	1.11414	2.22584	1.93584	1.61986	0.1164	Q0PAT2	Cj0585	11	12	11	2.54467	2.71199	1.62322	2.29329	0.0188
Q0PAT1	Cj0586	ligA Cj0586	DNA ligase (EC 6.5.1.2) (Polydeoxyribonucleotide synthase [NAD(+)])	51	51	50	50	1.09674	1.0859	1.1354	1.1025	1.10513	0.018427	Q0PAT1	Cj0586	37	37	36	0.928501	1.29638	1.14057	1.12182	0.3169
Q0PAS9	Cj0588	tlyA Cj0588	Putative haemolysin	8	8	9	9	0.90381	0.795918	1.0455	0.972299	0.929381	0.27191	Q0PAS9	Cj0588	10	9	9	0.65962	0.814573	0.800712	0.758302	0.081
Q0PAS8	Cj0589	ribF Cj0589	Putative riboflavin kinase/FMN adenylyltransferase (EC 2.7.1.26) (EC 2.7.7.2)	13	13	12	12	1.19154	1.16663	1.2687	1.18861	1.20387	0.0037	Q0PAS8	Cj0589	7	9	6	2.00661	1.56225	0.768559	1.44581	0.2857
Q0PAS7	Cj0590	cmoA Cj0590	tRNA (cmo5U34)-methyltransferase (EC 2.1.1.-)	14	14	16	16	0.99484	0.961505	1.0619	1.01144	1.00742	0.47229	Q0PAS7	Cj0590	11	11	14	1.15546	1.16343	0.768892	1.02926	0.8332
Q0PAS6	Cj0591c	Cj0591c	Putative lipoprotein	2	2	1	1	0.830768	0.757436	0.674243	0.764722	0.756792	0.0072	Q0PAS6	Cj0591c	5	4	5	0.658627	0.596959	1.04694	0.767509	0.1741
Q0PAS5	Cj0592c	Cj0592c	Putative periplasmic protein	12	12	10	10	0.645091	0.542203	0.644702	0.624011	0.614002	0.0005	Q0PAS5	Cj0592c	10	10	10	0.631401	0.705017	0.461301	0.59924	0.0052
Q0PAS3	Cj0594c	Cj0594c	Putative DNA/RNA non-specific endonuclease (EC 3.1.30.-)	8	7	8	7	1.06994	1.89905	1.24116	1.16329	1.34336	0.40737	Q0PAS3	Cj0594c	15	12	14	2.1761	2.84416	1.86908	2.29645	0.0108
Q0PAS2	Cj0595c	nth Cj0595c	Endonuclease III (EC 4.2.99.18)	11	11	11	11	1.01945	1.04035	1.04452	1.01102	1.02884	0.087264	Q0PAS2	Cj0595c	13	12	11	0.683153	0.941462	1.30315	0.975921	0.8999
Q0PAS1	Cj0596	cbf2 peb4A Cj0596	Putative peptidyl-prolyl cis-trans isomerase Cbf2 (PPIase Cbf2) (EC 5.2.1.8) (Cell-binding factor 2) (Major antigen peb4A) (Rotamase Cbf2)	54	54	54	54	0.613306	0.630885	0.56911	0.523286	0.584147	0.00031	Q0PAS1	Cj0596	60	57	59	0.371145	0.615587	0.533424	0.506719	0.00244
Q0PAS0	Cj0597	fba fda fdaC Cj0597	Fructose-bisphosphate aldolase (FBP aldolase) (FBPA) (EC 4.1.2.13) (Fructose-1,6-bisphosphate aldolase)	35	35	27	27	0.547292	0.576005	0.639488	0.739701	0.625622	0.004291	Q0PAS0	Cj0597	29	27	35	0.681262	0.690236	0.625748	0.665749	5.16e-06
Q0PAR9	Cj0598	Cj0598	Putative membrane protein	27	27	28	28	0.608788	0.66966	0.695656	0.743156	0.679315	0.0080946	Q0PAR9	Cj0598	29	27	30	1.11268	0.944973	0.886699	0.98145	0.7978
Q0PAR8	Cj0599	Cj0599	Putative OmpA family membrane protein	12	12	14	14	0.892964	0.857633	0.743342	0.855373	0.837328	0.030672	Q0PAR8	Cj0599	11	12	12	0.713921	0.773929	1.1978	0.895218	0.5292
Q0PAR6	Cj0601c	Cj0601c	Transporter	ND	ND	2	2	ND	ND	1.36499	1.04982	1.20741	ND	Q0PAR6	Cj0601c	2	2	2	1.39514	1.38444	1.20217	1.32725	0.0064
Q0PAR5	Cj0602c	Cj0602c	MOSC-domain containing protein	1	1	ND	ND	0.595286	0.710547	ND	ND	0.652916	ND	Q0PAR5	Cj0602c	ND	ND	ND	ND	ND	ND	ND	ND
Q9PHR3	Cj0603c	dsbD Cj0603c	Thiol:disulfide interchange protein DsbD (EC 1.8.1.8) (Protein-disulfide reductase) (Disulfide reductase)	6	6	6	6	1.00684	0.951243	0.938781	0.981593	0.969613	0.55476	Q9PHR3	Cj0603c	9	9	12	1.09621	1.12194	0.927101	1.04842	0.4725
Q0PAR3	Cj0604	ppk2 Cj0604	Putative polyphosphate kinase	25	25	22	22	1.08985	1.07024	1.03337	1.04515	1.05965	0.0349	Q0PAR3	Cj0604	41	38	39	0.9617	0.969529	0.767251	0.899493	0.2033
Q0PAR2	Cj0605	Cj0605	Putative amidohydrolase	18	18	17	16	1.04107	1.05846	1.02541	1.03704	1.0405	0.18142	Q0PAR2	Cj0605	13	17	15	1.19239	1.27101	0.801727	1.08838	0.5754
Q0PAR1	Cj0606	Cj0606	Putative secretion protein HlyD	14	14	13	13	0.724928	0.771141	0.736701	0.758515	0.747821	0.0047419	Q0PAR1	Cj0606	19	14	13	0.837454	1.09512	0.885612	0.939395	0.4862
Q0PAR0	Cj0607	macB Cj0607	Macrolide export ATP-binding/permease protein MacB (EC 3.6.3.-)	12	12	15	15	1.92684	1.02654	1.76989	2.01334	1.68415	0.022072	Q0PAR0	Cj0607	37	33	34	2.72857	2.22018	2.09416	2.34764	0.00126
Q0PAQ9	Cj0608	Cj0608	Putative outer membrane efflux protein	6	5	4	4	1.98135	1.81121	2.21388	1.39222	1.84967	0.0163	Q0PAQ9	Cj0608	16	14	15	2.7077	1.72636	2.96616	2.46674	0.0403
Q0PAQ8	Cj0609c	Cj0609c	Possible periplasmic protein	15	15	12	12	0.882701	0.885684	0.860584	0.987681	0.904162	0.08173	Q0PAQ8	Cj0609c	25	25	25	0.699614	0.938347	0.913643	0.850535	0.1199
Q0PAQ7	Cj0610c	patA Cj0610c	Putative periplasmic protein	15	15	14	14	1.31986	1.7554	1.23988	1.86666	1.54545	0.013814	Q0PAQ7	Cj0610c	14	15	18	1.73852	1.28621	1.9746	1.66644	0.0299
Q46106	Cj0612c	ftn cft Cj0612c	Ferritin (EC 1.16.3.1)	16	16	14	14	0.721174	0.844998	0.8581	0.863828	0.822025	0.0248	Q46106	Cj0612c	15	14	14	0.991531	0.748527	0.75041	0.830156	0.1031
Q0PAQ4	Cj0613	pstS Cj0613	Putative periplasmic phosphate binding protein	34	34	34	34	0.880852	0.724315	0.85538	0.712522	0.793267	0.0341	Q0PAQ4	Cj0613	23	24	21	0.808336	1.00509	0.770099	0.861176	0.1292
Q0PAQ3	Cj0614	pstC Cj0614	Putative phosphate transport system permease protein	2	2	ND	ND	1.80334	1.35839	ND	ND	1.58087	ND	Q0PAQ3	Cj0614	ND	ND	ND	ND	ND	ND	ND	ND
Q9PHQ1	Cj0616	pstB Cj0616	Phosphate import ATP-binding protein PstB (EC 3.6.3.27) (ABC phosphate transporter) (Phosphate-transporting ATPase)	5	5	8	8	0.987056	1.0715	1.44687	1.27029	1.19393	0.2782	Q9PHQ1	Cj0616	8	5	8	2.54326	2.99153	2.00923	2.51467	0.0059
Q0PAP7	Cj0620	Cj0620	Putative uncharacterized protein (YgjP-like domain-containing protein)	1	1	ND	ND	1.43739	1.24357	ND	ND	1.34048	ND	Q0PAP7	Cj0620	ND	ND	2	ND	ND	1.43524	1.43524	ND
Q0PAP6	Cj0621	Cj0621	Putative uncharacterized protein (Serine/threonine protein kinase)	32	32	35	35	1.04651	1.07513	1.06024	1.12861	1.07762	0.045	Q0PAP6	Cj0621	15	15	15	1.3864	1.08892	0.941692	1.139	0.3478
Q0PAP5	Cj0622	hypF Cj0622	Carbamoyltransferase (EC 2.1.3.-)	18	18	13	13	1.19918	1.19623	1.41436	1.87813	1.42197	0.1543	Q0PAP5	Cj0622	14	13	14	1.4783	1.45641	1.89424	1.60965	0.0128
Q0PAP4	Cj0623	hypB Cj0623	Hydrogenase isoenzymes formation protein	16	16	16	16	0.880201	0.873238	0.651653	0.783845	0.797234	0.0641	Q0PAP4	Cj0623	16	16	15	0.740841	0.740906	0.768937	0.750228	4.8e-05
Q0PAP3	Cj0624	hypC Cj0624	Hydrogenase isoenzymes formation protein	6	6	6	6	1.14324	1.29809	1.82376	0.977748	1.31071	0.30879	Q0PAP3	Cj0624	5	5	5	0.594064	2.20832	1.1164	1.30626	0.5546
Q0PAP2	Cj0625	hypD Cj0625	Hydrogenase isoenzymes formation protein	27	27	25	25	0.992723	0.98063	0.625586	0.774171	0.843277	0.3018	Q0PAP2	Cj0625	25	25	25	0.764575	0.618127	0.674511	0.685738	0.0018
Q0PAP1	Cj0626	hypE Cj0626	Hydrogenase isoenzymes formation protein	31	31	27	27	1.10722	1.09141	1.08638	1.09938	1.0961	0.015035	Q0PAP1	Cj0626	21	27	20	0.933785	0.922957	0.865305	0.907349	0.0432
Q9PHP0	Cj0627	hypA Cj0627	Probable hydrogenase nickel incorporation protein HypA	2	2	4	4	1.2187	1.09166	1.11153	0.993422	1.10383	0.23634	Q9PHP0	Cj0627	ND	2	2	ND	0.710973	1.03558	0.873274	0.3718
Q0PAN9	Cj0628	CapA Cj0628	Putative lipoprotein	7	7	6	6	1.0926	1.02205	1.01265	1.45263	1.14498	0.5353	Q0PAN9	Cj0628	41	34	40	1.63818	1.29605	1.25404	1.39609	0.0312
Q0PAN8	Cj0630c	holA Cj0630c	Putative DNA polymerase III, delta subunit	10	10	11	11	1.06093	1.04072	1.10048	1.0806	1.07068	0.024506	Q0PAN8	Cj0630c	2	2	2	1.99754	0.430438	1.41323	1.2804	0.5729
Q0PAN7	Cj0631c	Cj0631c	Putative ribonuclease	11	11	11	11	0.985955	1.04575	0.887941	1.01117	0.982706	0.8641	Q0PAN7	Cj0631c	11	11	11	1.2405	0.640587	1.27097	1.05069	0.8171
Q9PHN5	Cj0632	ilvC Cj0632	Ketol-acid reductoisomerase (EC 1.1.1.86) (Acetohydroxy-acid isomeroreductase) (Alpha-keto-beta-hydroxylacyl reductoisomerase)	27	27	24	24	0.898589	0.93043	1.00851	0.984302	0.955459	0.20671	Q9PHN5	Cj0632	27	24	35	1.12832	0.832355	0.931961	0.964212	0.7017
Q0PAN5	Cj0633	Cj0633	Putative periplasmic protein	2	1	3	2	0.994238	0.885644	1.00865	1.2094	1.02448	0.63765	Q0PAN5	Cj0633	12	10	9	1.04903	0.964427	0.972264	0.995239	0.8685
Q0PAN4	Cj0634	dprA Cj0634	DNA processing protein A	5	5	8	8	1.03363	1.11095	0.956936	1.07722	1.04468	0.22923	Q0PAN4	Cj0634	10	10	10	0.52196	0.905176	1.04499	0.82404	0.3233
Q9PHN2	Cj0635	Cj0635	Putative Holliday junction resolvase (EC 3.1.-.-) (Putative pre-16S rRNA nuclease (EC 3.1.-.-))	6	6	5	5	1.62697	1.3764	1.33029	1.46042	1.44852	0.0067073	Q9PHN2	Cj0635	6	4	ND	1.00001	0.913742	ND	0.956877	0.2723
Q0PAN2	Cj0636	Cj0636	NOL1/NOP2/sun family protein	8	8	7	7	0.825411	0.862259	0.75631	0.847379	0.82284	0.0073	Q0PAN2	Cj0636	6	7	6	0.732191	1.71782	0.801872	1.08396	0.8045
Q9PHN0	Cj0637c	msrA Cj0637c	Peptide methionine sulfoxide reductase MsrA (Protein-methionine-S-oxide reductase) (EC 1.8.4.11) (Peptide-methionine (S)-S-oxide reductase) (Peptide Met(O) reductase)	4	4	7	7	1.42856	1.37304	1.57742	1.26238	1.41035	0.0082	Q9PHN0	Cj0637c	3	3	4	3.81781	0.516517	0.817771	1.71737	0.5334
Q9PHM9	Cj0638c	ppa Cj0638c	Inorganic pyrophosphatase (EC 3.6.1.1) (Pyrophosphate phospho-hydrolase) (PPase)	21	21	22	22	1.11651	0.99606	1.13124	1.02874	1.06814	0.15277	Q9PHM9	Cj0638c	21	22	19	1.00149	1.03888	0.772236	0.937536	0.4953
Q9PHM8	Cj0639c	adk Cj0639c	Adenylate kinase (AK) (EC 2.7.4.3) (ATP-AMP transphosphorylase) (ATP:AMP phosphotransferase) (Adenylate monophosphate kinase)	24	24	24	24	1.1718	1.07389	1.15031	1.01322	1.10231	0.10603	Q9PHM8	Cj0639c	24	25	25	1.86883	0.954287	1.14866	1.32392	0.3089
Q9PHM7	Cj0640c	aspS Cj0640c	Aspartate--tRNA ligase (EC 6.1.1.12) (Aspartyl-tRNA synthetase) (AspRS)	65	65	59	59	1.02245	1.04178	1.05773	1.00826	1.03256	0.06631	Q9PHM7	Cj0640c	70	69	71	1.19381	0.879773	1.097	1.05686	0.5734
Q9PHM6	Cj0641	ppnK Cj0641	Probable inorganic polyphosphate/ATP-NAD kinase (Poly(P)/ATP NAD kinase) (EC 2.7.1.23)	8	8	6	6	0.99877	1.04313	1.01414	1.11235	1.0421	0.3156	Q9PHM6	Cj0641	6	5	5	0.782844	0.729898	1.07265	0.861798	0.2643
Q9PHM5	Cj0642	recN Cj0642	DNA repair protein RecN (Recombination protein N)	26	26	26	26	0.982466	1.02876	0.898385	0.908919	0.954633	0.32832	Q9PHM5	Cj0642	26	26	29	1.23781	0.833202	0.802789	0.957935	0.7791
Q0PAM5	Cj0643	cbrR Cj0643	Two-component response regulator	31	31	27	27	0.678376	1.0608	0.590832	0.599312	0.732331	0.184	Q0PAM5	Cj0643	31	31	32	0.804783	0.707883	0.628632	0.713766	0.0049
Q0PAM4	Cj0644	Cj0644	Putative TatD-related deoxyribonuclease protein	16	16	17	17	1.49444	1.42056	1.398	1.35945	1.41811	0.0050241	Q0PAM4	Cj0644	4	4	4	2.04236	1.74854	1.32672	1.70587	0.0273
Q0PAM3	Cj0645	Cj0645	Putative secreted transglycosylase	ND	ND	ND	ND	ND	ND	ND	ND	ND	ND	Q0PAM3	Cj0645	ND	2	ND	ND	1.80019	ND	1.80019	ND
Q9PHM1	Cj0646	rlpA Cj0646	RlpA-like lipoprotein (Endolytic peptidoglycan transglycosylase RlpA (EC 4.2.2.-))	11	11	10	10	1.36559	1.37971	1.36056	1.57455	1.4201	0.017877	Q9PHM1	Cj0646	15	14	15	2.12093	1.56489	1.27267	1.65283	0.0486
Q0PAM1	Cj0647	Cj0647	3-deoxy-D-manno-octulosonate 8-phosphate phosphatase KdsC (EC 3.1.3.45) (KDO 8-P phosphatase)	11	11	12	12	1.09713	1.18712	1.07707	1.24689	1.15206	0.0629	Q0PAM1	Cj0647	9	9	9	1.51565	0.870459	0.79146	1.05919	0.8091
Q0PAM0	Cj0648	Cj0648	Putative membrane protein	6	6	7	7	1.03049	1.44048	1.25552	2.86531	1.64795	#N/A	Q0PAM0	Cj0648	6	7	6	2.70836	1.24134	1.85618	1.93529	0.0928
Q0PAL9	Cj0649	Cj0649	Putative OstA family protein	4	4	4	4	1.00341	1.18101	0.950958	1.16347	1.07471	0.17824	Q0PAL9	Cj0649	9	4	ND	1.05759	0.881742	ND	0.969666	0.675
Q9PHL7	Cj0650	engB Cj0650	Probable GTP-binding protein EngB	7	7	7	7	0.98703	1.12042	1.06243	1.20497	1.09371	0.2464	Q9PHL7	Cj0650	7	7	9	1.16259	0.996784	ND	1.07969	0.4379
Q0PAL6	Cj0652	pbpC Cj0652	Penicillin-binding protein	8	8	9	9	1.49269	1.65442	1.13996	1.45455	1.4354	0.0272	Q0PAL6	Cj0652	24	24	24	1.81867	1.29782	1.44272	1.51974	0.0286
Q0PAL5	Cj0653c	Cj0653c	Putative aminopeptidase	33	33	34	34	1.27286	1.10862	1.12276	1.15583	1.16502	0.030258	Q0PAL5	Cj0653c	18	17	18	1.26385	1.23202	0.836528	1.1108	0.4654
Q0PAL4	Cj0659c	Cj0659c	Putative periplasmic protein	2	2	2	2	1.31075	1.32806	1.32236	3.50114	1.86558	ND	Q0PAL4	Cj0659c	ND	2	2	ND	2.53348	3.68187	3.10767	0.0469
Q0PAL3	Cj0660c	Cj0660c	Putative transmembrane protein	2	ND	ND	2	2.03817	ND	ND	1.43016	1.73417	ND	Q0PAL3	Cj0660c	ND	3	4	ND	1.62407	2.08951	1.85679	0.0665
Q9PHL1	Cj0661c	era Cj0661c	GTPase Era	8	8	11	11	0.608491	0.735528	0.739036	0.762681	0.711434	0.0078415	Q9PHL1	Cj0661c	11	12	14	1.68985	1.00763	1.11178	1.26975	0.2725
Q9PHL0	Cj0662c	hslU Cj0662c	ATP-dependent protease ATPase subunit HslU (Unfoldase HslU)	60	60	56	56	1.19018	1.06923	1.17895	1.10367	1.13551	0.0367	Q9PHL0	Cj0662c	55	56	55	0.950961	0.990697	1.09041	1.01069	0.8093
Q9PHK9	Cj0663c	hslV Cj0663c	ATP-dependent protease subunit HslV (EC 3.4.25.2)	4	4	4	4	0.760231	0.827573	1.0328	0.767803	0.847102	0.1848	Q9PHK9	Cj0663c	7	4	7	0.868753	0.644377	0.768917	0.760682	0.0211
Q9PHK8	Cj0664c	rplI Cj0664c	50S ribosomal protein L9	23	23	21	21	1.25246	0.994102	1.31217	0.836782	1.09888	0.5857	Q9PHK8	Cj0664c	22	23	21	1.33205	0.896708	0.826037	1.01827	0.9137
Q9PHK7	Cj0665c	argG Cj0665c	Argininosuccinate synthase (EC 6.3.4.5) (Citrulline--aspartate ligase)	41	41	43	43	1.09149	1.08333	1.09813	1.06309	1.08401	0.028518	Q9PHK7	Cj0665c	41	43	45	1.05518	0.855217	0.930354	0.946916	0.4141
Q0PAK7	Cj0667	Cj0667	Putative S4 domain protein	3	3	3	3	1.08673	1.00491	1.18151	1.19979	1.11824	0.051774	Q0PAK7	Cj0667	ND	2	2	ND	0.918724	1.21855	1.06864	0.5825
Q0PAK6	Cj0668	Cj0668	tRNA threonylcarbamoyladenosine biosynthesis protein TsaE (t(6)A37 threonylcarbamoyladenosine biosynthesis protein TsaE)	5	5	6	6	1.18309	1.14295	0.988749	0.96688	1.07042	0.4358	Q0PAK6	Cj0668	ND	ND	ND	ND	ND	ND	ND	ND
Q0PAK5	Cj0669	Cj0669	ABC-transporter ATP-binding protein	14	14	15	15	0.982126	0.922615	0.857257	0.950678	0.928169	0.1459	Q0PAK5	Cj0669	14	15	16	0.911121	0.512284	0.695683	0.706363	0.0635
Q0PAK4	Cj0670	rpoN Cj0670	RNA polymerase sigma-54 factor	22	22	22	22	1.17898	1.22684	1.5127	2.74965	1.66704	0.1678	Q0PAK4	Cj0670	14	14	14	2.51951	1.91281	1.9558	2.12937	0.004512
Q0PAK3	Cj0671	dcuB Cj0671	Anaerobic C4-dicarboxylate transporter	4	4	2	2	1.26472	1.20058	1.91983	5.91693	2.57552	0.02561	Q0PAK3	Cj0671	8	8	8	5.58266	4.83512	1.86606	4.09461	0.0248
Q0PAK1	Cj0677	kdpB Cj0677	Potassium-transporting ATPase B chain (EC 3.6.3.12)	1	1	1	1	0.302491	3.03214	0.347666	0.460054	1.03559	0.51733	Q0PAK1	Cj0677	ND	ND	ND	ND	ND	ND	ND	ND
Q9PPM7	Cj0680c	uvrB Cj0680c	UvrABC system protein B (Protein UvrB) (Excinuclease ABC subunit B)	44	44	47	47	1.50576	1.32602	1.37332	1.27522	1.37008	0.0056101	Q9PPM7	Cj0680c	41	40	37	1.14287	1.57761	0.953505	1.22466	0.2908
Q0PAJ8	Cj0681	Cj0681	Cell division protein ZapB	19	19	21	21	0.506822	0.536441	0.643833	0.69573	0.595707	0.003729	Q0PAJ8	Cj0681	15	15	14	0.551313	0.583411	0.673366	0.602696	0.00043
Q0PAJ7	Cj0682	Cj0682	Putative uncharacterized protein (DUF507 family protein)	6	6	9	9	1.30774	1.16072	1.38014	1.11712	1.24143	0.019787	Q0PAJ7	Cj0682	5	5	5	1.31277	1.12279	2.3085	1.58135	0.189
Q0PAJ5	Cj0684	priA Cj0684	Putative primosomal protein N' (EC 3.6.1.-)	6	6	4	4	0.987651	1.19552	1.14083	2.52614	1.46253	0.80509	Q0PAJ5	Cj0684	ND	4	4	ND	1.30992	2.14337	1.72665	0.1013
Q9PPM1	Cj0686	ispG gcpE Cj0686	4-hydroxy-3-methylbut-2-en-1-yl diphosphate synthase (EC 1.17.7.1) (1-hydroxy-2-methyl-2-(E)-butenyl 4-diphosphate synthase)	27	27	29	29	1.30302	1.20448	1.23937	1.23947	1.24658	0.0083296	Q9PPM1	Cj0686	27	27	27	1.23354	0.837436	0.823634	0.96487	0.8067
Q9PPM0	Cj0687c	flgH Cj0687c	Flagellar L-ring protein (Basal body L-ring protein)	4	4	2	2	1.55886	1.49099	1.76836	1.88616	1.67609	0.040563	Q9PPM0	Cj0687c	11	10	11	2.64542	2.15752	2.20079	2.33458	0.0072
Q0PAJ1	Cj0688	pta Cj0688	Putative phosphate acetyltransferase (EC 2.3.1.8)	49	49	48	48	1.07282	1.10946	1.10029	1.04359	1.08154	0.024028	Q0PAJ1	Cj0688	43	43	43	1.24725	0.84929	0.925571	1.00737	0.9547
Q9PPL8	Cj0689	ackA Cj0689	Acetate kinase (EC 2.7.2.1) (Acetokinase)	48	48	46	46	1.00902	0.985867	1.04688	0.967904	1.00242	0.48184	Q9PPL8	Cj0689	45	45	45	0.939456	0.80702	1.03797	0.928148	0.3433
Q0PAI9	Cj0690c	Cj0690c	Site-specific DNA-methyltransferase (adenine-specific) (EC 2.1.1.72)	23	23	24	24	1.20776	1.09558	1.10224	1.1216	1.1318	0.014978	Q0PAI9	Cj0690c	38	39	39	0.674128	1.3675	0.927103	0.989577	0.9614
Q0PAI8	Cj0691	Cj0691	Putative membrane protein	3	3	2	2	0.56708	0.685659	0.604723	0.685519	0.635745	0.00127	Q0PAI8	Cj0691	5	4	5	1.84063	1.70112	1.42161	1.65445	0.006
Q0PAI7	Cj0692c	Cj0692c	Putative membrane protein	8	8	9	9	2.29015	1.37998	1.04351	2.15725	1.71772	0.086947	Q0PAI7	Cj0692c	17	9	17	1.64105	1.13549	2.30255	1.69303	0.1767
Q9PPL4	Cj0693c	rsmH mraW Cj0693c	Ribosomal RNA small subunit methyltransferase H (EC 2.1.1.199) (16S rRNA m(4)C1402 methyltransferase) (rRNA (cytosine-N(4)-)-methyltransferase RsmH)	10	10	8	8	0.832923	0.741076	1.06946	0.92321	0.891668	0.3603	Q9PPL4	Cj0693c	17	15	17	0.644422	0.807799	1.072	0.841406	0.2719
Q0PAI5	Cj0694	Cj0694	Putative periplasmic protein	41	41	34	34	0.954969	0.925727	0.973777	0.97875	0.958306	0.22306	Q0PAI5	Cj0694	56	54	55	1.2667	1.11348	1.14259	1.17426	0.0207
Q0PAI4	Cj0695	ftsA Cj0695	Cell division protein FtsA	29	29	26	26	1.19811	1.17263	1.26535	1.23807	1.21854	0.0029827	Q0PAI4	Cj0695	29	29	29	1.21862	1.17219	0.961908	1.11757	0.2108
Q0PAI3	Cj0696	ftsZ Cj0696	Cell division protein FtsZ	24	24	21	21	0.679302	0.710579	0.783246	0.737139	0.727566	0.0012	Q0PAI3	Cj0696	35	35	35	0.767417	0.932967	1.01949	0.906623	0.2753
Q0PAI2	Cj0697	flgG2 Cj0697	Flagellar basal-body rod protein	3	3	4	4	1.31249	1.22952	1.5869	1.20492	1.33346	0.0318	Q0PAI2	Cj0697	ND	3	3	ND	2.10317	4.19516	3.14916	0.0404
Q0PAI1	Cj0698	flgG Cj0698	Flagellar basal-body rod protein	3	3	5	5	0.914844	1.14053	0.968311	0.843572	0.966814	0.73175	Q0PAI1	Cj0698	8	8	8	1.35852	1.47223	1.30495	1.37857	0.0015
Q0PAI0	Cj0699c	glnA Cj0699c	Glutamine synthetase (EC 6.3.1.2)	25	25	23	23	1.02969	0.930526	1.04392	0.977931	0.995517	0.93439	Q0PAI0	Cj0699c	25	25	28	1.04029	1.06775	0.942854	1.01697	0.6775
Q0PAH9	Cj0700	Cj0700	Chemotaxis protein	19	19	14	14	1.06154	1.11137	1.11197	1.12625	1.10278	0.069643	Q0PAH9	Cj0700	17	19	16	1.18593	0.740059	0.86862	0.931536	0.6326
Q0PAH8	Cj0701	Cj0701	Putative protease	28	28	30	30	1.13524	1.04623	1.17482	1.04127	1.09939	0.1162	Q0PAH8	Cj0701	28	28	28	0.817544	0.871306	1.08385	0.924234	0.4041
Q0PAH7	Cj0702	purE Cj0702	N5-carboxyaminoimidazole ribonucleotide mutase (N5-CAIR mutase) (EC 5.4.99.18)	7	7	9	9	1.07645	1.23513	1.07049	1.32613	1.17705	0.050685	Q0PAH7	Cj0702	11	11	11	1.48314	0.974256	1.07114	1.17618	0.3219
Q0PAH6	Cj0703	Cj0703	Putative uncharacterized protein (DUF3972 domain-containing protein)	15	15	15	15	1.02294	1.04257	1.0349	0.995487	1.02397	0.31226	Q0PAH6	Cj0703	15	15	17	1.30093	1.20408	1.20049	1.23517	0.0201
Q9PPK3	Cj0704	glyQ Cj0704	Glycine--tRNA ligase alpha subunit (EC 6.1.1.14) (Glycyl-tRNA synthetase alpha subunit) (GlyRS)	18	18	17	17	0.885615	0.985628	0.796605	0.930804	0.899663	0.1696	Q9PPK3	Cj0704	18	21	21	0.942116	1.3202	0.836589	1.03297	0.8333
Q9PPK2	Cj0705	Cj0705	GTP cyclohydrolase 1 type 2 homolog	6	6	5	5	1.21166	1.16644	1.43523	1.26639	1.26993	0.027164	Q9PPK2	Cj0705	ND	ND	2	ND	ND	1.15184	1.15184	ND
Q0PAH3	Cj0706	Cj0706	Putative uncharacterized protein (zf-RING_7 domain-containing protein)	50	50	46	46	1.39509	1.26124	1.36876	1.20928	1.30859	0.0095	Q0PAH3	Cj0706	46	43	43	1.30643	1.72316	0.870459	1.30002	0.2899
Q0PAH2	Cj0707	kdtA Cj0707	3-deoxy-D-manno-octulosonic-acid transferase (Kdo transferase) (EC 2.4.99.12) (Lipid IV(A) 3-deoxy-D-manno-octulosonic acid transferase)	2	2	3	3	1.31762	1.32178	1.53529	1.5969	1.4429	0.0087	Q0PAH2	Cj0707	7	4	6	1.2737	1.32752	1.43431	1.34518	0.0019
Q0PAH1	Cj0708	Cj0708	Pseudouridine synthase (EC 5.4.99.-)	9	9	10	10	0.59456	0.613001	0.512227	0.611862	0.582912	0.0059669	Q0PAH1	Cj0708	16	16	16	0.726503	1.05166	0.691271	0.823146	0.1981
Q0PAH0	Cj0709	ffh Cj0709	Signal recognition particle protein	51	51	50	50	1.28152	1.2297	1.33778	1.21631	1.26633	0.0018587	Q0PAH0	Cj0709	44	41	42	1.25326	1.31655	1.31162	1.29381	0.0001
Q9PPJ7	Cj0710	rpsP Cj0710	30S ribosomal protein S16	8	8	8	8	1.00024	0.977593	0.937473	0.970704	0.971503	0.75651	Q9PPJ7	Cj0710	8	8	8	1.49184	0.91703	0.555845	0.988239	0.9676
Q0PAG8	Cj0711	Cj0711	Putative uncharacterized protein (KH domain-containing protein)	7	7	4	4	0.843069	0.926472	0.366663	0.183296	0.579875	0.1962	Q0PAG8	Cj0711	ND	4	5	ND	0.2083	0.138621	0.173461	0.00181
Q9PPJ5	Cj0712	rimM Cj0712	Ribosome maturation factor RimM	8	8	7	7	1.1389	0.884328	0.990116	1.08832	1.02542	0.57765	Q9PPJ5	Cj0712	4	3	ND	0.751914	0.944807	ND	0.848361	0.1254
Q9PPJ4	Cj0713	trmD Cj0713	tRNA (guanine-N(1)-)-methyltransferase (EC 2.1.1.228) (M1G-methyltransferase) (tRNA [GM37] methyltransferase)	5	5	6	6	1.14227	1.0175	0.926626	0.945886	1.00807	0.84141	Q9PPJ4	Cj0713	7	5	7	1.02157	1.30654	0.995803	1.10797	0.3392
Q9PPJ3	Cj0714	rplS Cj0714	50S ribosomal protein L19	15	14	15	14	0.98396	1.03834	0.959809	0.996144	0.994562	0.7109	Q9PPJ3	Cj0714	14	15	18	0.504741	0.807799	0.777102	0.696548	0.0345
Q0PAG4	Cj0715	Cj0715	5-hydroxyisourate hydrolase	18	18	16	16	1.00179	0.846629	0.181584	0.571756	0.650439	0.2647	Q0PAG4	Cj0715	21	21	21	0.628448	0.517424	0.680319	0.60873	0.0012
Q0PAG3	Cj0716	Cj0716	Putative phospho-2-dehydro-3-deoxyheptonate aldolase (EC 2.5.1.54)	32	32	30	30	1.13794	1.26109	1.10433	1.1308	1.15854	0.010056	Q0PAG3	Cj0716	32	32	32	1.11848	1.10399	1.08807	1.10351	0.0328
Q0PAG2	Cj0717	Cj0717	Putative ArsC family protein	17	17	18	18	1.2006	0.964386	1.20765	0.941324	1.07849	0.5115	Q0PAG2	Cj0717	12	12	13	1.00923	0.832355	0.894634	0.912072	0.1648
Q9PPI9	Cj0718	dnaE Cj0718	DNA polymerase III subunit alpha (EC 2.7.7.7)	41	41	39	39	1.06317	1.09461	1.01382	1.04314	1.05369	0.086947	Q9PPI9	Cj0718	58	62	61	0.784619	1.2823	1.27605	1.11433	0.5262
Q0PAG0	Cj0719c	Cj0719c	Pyridoxal phosphate homeostasis protein (PLP homeostasis protein)	8	8	9	9	0.82039	0.981513	0.823256	0.913873	0.884758	0.1193	Q0PAG0	Cj0719c	11	9	8	1.37688	1.02283	0.899254	1.09965	0.5246
P96747	Cj0720c	flaC Cj0720c	Secreted flagellin C	13	13	12	12	3.7292	1.0851	1.09217	1.936	1.96062	0.2204	P96747	Cj0720c	10	10	10	2.73546	1.56649	2.13973	2.14722	0.01751
Q0PAF7	Cj0722c	Cj0722c	Putative DNA methylase	13	13	12	12	0.93787	0.931339	1.60307	1.98594	1.36455	0.13189	Q0PAF7	Cj0722c	3	3	3	2.03999	1.88232	1.02596	1.64942	0.1083
Q0PAF6	Cj0723c	Cj0723c	Putative integral membrane zinc-metalloprotease	6	6	2	2	0.842849	0.791145	1.4849	1.42308	1.13549	0.6503	Q0PAF6	Cj0723c	10	10	10	1.45054	1.48605	1.47509	1.47056	6.1e-05
Q0PAF4	Cj0725c	Cj0725c	Molybdopterin biosynthesis protein	24	24	23	23	1.11623	1.01423	1.11042	1.1242	1.09127	0.092704	Q0PAF4	Cj0725c	23	23	23	1.00697	0.889087	1.02067	0.972243	0.5427
Q9PPI1	Cj0726c	corA Cj0726c	Magnesium transport protein CorA	14	14	13	13	1.97562	1.10204	1.55093	1.10127	1.43247	0.1029	Q9PPI1	Cj0726c	14	16	17	1.73529	1.8046	1.40645	1.64878	0.0062
Q0PAF2	Cj0727	Cj0727	Putative periplasmic solute-binding protein	9	9	10	10	0.99692	0.97699	0.912159	0.81538	0.925363	0.24625	Q0PAF2	Cj0727	ND	ND	ND	ND	ND	ND	ND	ND
Q0PAF1	Cj0728	Cj0728	Putative periplasmic protein	6	6	2	2	1.2144	1.34164	1.20165	1.19543	1.23828	0.0102	Q0PAF1	Cj0728	2	2	2	1.17733	1.21847	1.49689	1.29756	0.0414
Q46125	Cj0734c	hisJ cjaC Cj0734c	Histidine-binding protein (HBP) (p29)	14	14	14	14	0.849383	0.284576	0.357106	0.448808	0.484968	0.0265	Q46125	Cj0734c	25	25	27	0.846411	0.462325	0.414403	0.57438	0.0359
Q0PAD5	Cj0753c	Cj0753c	Protein TonB	ND	ND	ND	ND	ND	ND	ND	ND	ND	ND	Q0PAD5	Cj0753c	ND	4	ND	ND	1.78495	ND	1.78495	ND
Q0PAD4	Cj0755	cfrA Cj0755	Ferric enterobactin uptake receptor	3	3	44	44	2.27748	1.59011	1.83592	3.60802	2.32788	0.006275	Q0PAD4	Cj0755	44	44	44	1.9338	2.50553	3.29696	2.57876	0.01497
Q9PPG2	Cj0757	hrcA Cj0757	Heat-inducible transcription repressor HrcA	ND	ND	1	1	ND	ND	1.14932	0.938344	1.04383	ND	Q9PPG2	Cj0757	ND	ND	ND	ND	ND	ND	ND	ND
O69297	Cj0758	grpE Cj0758	Protein GrpE (HSP-70 cofactor)	14	14	12	12	1.51412	1.77263	1.15927	1.37719	1.45581	0.0381	O69297	Cj0758	8	8	8	1.54647	2.10415	1.06182	1.57081	0.1309
O69298	Cj0759	dnaK Cj0759	Chaperone protein DnaK (HSP70) (Heat shock 70 kDa protein) (Heat shock protein 70)	71	71	78	78	1.37002	1.26379	1.22717	1.22672	1.27192	0.0016043	O69298	Cj0759	78	78	72	0.915326	1.47115	1.09315	1.15988	0.3845
Q0PAD0	Cj0760	Cj0760	Putative uncharacterized protein (Lactamase_B domain-containing protein)	8	8	12	12	1.20222	1.00982	1.16736	1.05848	1.10947	0.1815	Q0PAD0	Cj0760	9	8	9	1.1305	0.991411	0.865378	0.995761	0.9585
Q0PAC9	Cj0761	Cj0761	Putative uncharacterized protein (Cupin domain-containing protein)	9	9	8	8	1.20418	1.0859	1.23117	1.09387	1.15378	0.0516	Q0PAC9	Cj0761	9	9	9	0.966932	1.0542	0.853682	0.958272	0.512
Q0PAC8	Cj0762c	aspB Cj0762c	Aspartate aminotransferase (EC 2.6.1.1)	49	49	47	47	0.797945	0.792185	0.744622	0.602383	0.734284	0.0177	Q0PAC8	Cj0762c	38	38	38	0.77868	0.597805	0.580262	0.652249	0.0054
Q0PAC7	Cj0763c	cysE Cj0763c	Serine acetyltransferase (EC 2.3.1.30)	10	10	10	10	0.781311	0.871138	0.83144	0.803981	0.821968	0.0034411	Q0PAC7	Cj0763c	7	7	7	0.633503	0.912796	0.935626	0.827309	0.15
Q0PAC6	Cj0764c	speA Cj0764c	Arginine decarboxylase (EC 4.1.1.19)	34	34	34	34	1.063	1.01767	1.06844	1.04332	1.04811	0.0493	Q0PAC6	Cj0764c	28	28	28	1.0948	0.991527	0.98477	1.0237	0.5421
Q9PPF4	Cj0765c	hisS Cj0765c	Histidine--tRNA ligase (EC 6.1.1.21) (Histidyl-tRNA synthetase) (HisRS)	29	29	29	29	0.824786	0.875983	0.887389	0.883401	0.86789	0.0038	Q9PPF4	Cj0765c	33	29	32	0.862553	0.911103	1.04793	0.94053	0.3443
Q9PPF3	Cj0766c	tmk Cj0766c	Thymidylate kinase (EC 2.7.4.9) (dTMP kinase)	26	26	22	22	1.04211	1.09493	1.12342	1.09766	1.08953	0.0249	Q9PPF3	Cj0766c	13	14	13	0.840561	1.22355	1.58457	1.21623	0.3711
Q9PPF2	Cj0767c	coaD kdtB Cj0767c	Phosphopantetheine adenylyltransferase (EC 2.7.7.3) (Dephospho-CoA pyrophosphorylase) (Pantetheine-phosphate adenylyltransferase) (PPAT)	14	14	15	15	0.923535	0.89275	0.926669	0.901951	0.911226	0.01362	Q9PPF2	Cj0767c	7	7	7	0.788475	0.985617	0.796297	0.856796	0.0904
Q9PPF1	Cj0768c	Cj0768c	Probable aromatic acid decarboxylase (EC 4.1.1.-) (Flavin prenyltransferase UbiX (EC 2.5.1.129))	12	12	10	10	1.04784	1.05155	1.06517	1.07048	1.05876	0.087139	Q9PPF1	Cj0768c	8	7	8	1.39467	1.08384	1.36913	1.28255	0.0471
Q0PAC1	Cj0769c	flgA Cj0769c	Flagella basal body P-ring formation protein FlgA	4	4	3	3	1.04706	1.0725	1.30059	0.952369	1.09313	0.41159	Q0PAC1	Cj0769c	ND	ND	ND	ND	ND	ND	ND	ND
Q0PAC0	Cj0770c	Cj0770c	Putative NLPA family lipoprotein	23	21	18	17	0.962315	1.02453	0.982906	0.975904	0.986414	0.89873	Q0PAC0	Cj0770c	14	13	13	0.576874	0.990697	1.16555	0.911041	0.6371
Q0PAB9	Cj0771c	Cj0771c	Putative NLPA family lipoprotein	27	25	29	28	1.2088	1.13653	1.22598	1.40426	1.24389	0.046	Q0PAB9	Cj0771c	17	21	16	2.25145	1.38698	1.3991	1.67917	0.0476
Q0PAB8	Cj0772c	Cj0772c	Putative NLPA family lipoprotein	26	26	29	29	0.912466	0.707456	0.938015	0.663375	0.805328	0.1374	Q0PAB8	Cj0772c	22	22	22	0.717772	1.14759	0.838993	0.901451	0.4841
Q0PAB7	Cj0773c	Cj0773c	Putative binding-protein dependent transport system permease protein	1	1	ND	ND	0.839244	0.982828	ND	ND	0.911036	ND	Q0PAB7	Cj0773c	ND	ND	ND	ND	ND	ND	ND	ND
Q0PAB6	Cj0774c	metN Cj0774c	Methionine import ATP-binding protein MetN (EC 3.6.3.-)	31	30	27	26	0.812367	0.844932	0.897768	0.838005	0.848268	0.0049	Q0PAB6	Cj0774c	28	31	26	1.44815	1.08384	1.27728	1.26976	0.0624
Q9PPE4	Cj0775c	valS Cj0775c	Valine--tRNA ligase (EC 6.1.1.9) (Valyl-tRNA synthetase) (ValRS)	79	79	76	76	1.24301	1.15173	1.22609	1.17477	1.1989	0.0026698	Q9PPE4	Cj0775c	69	71	70	0.854509	0.926298	1.03558	0.938794	0.3096
Q0PAB4	Cj0776c	Cj0776c	Putative periplasmic protein	21	21	19	19	0.692531	0.727152	0.765364	0.689378	0.718606	0.0055496	Q0PAB4	Cj0776c	38	33	36	0.778475	0.704929	0.989004	0.824136	0.1077
Q0PAB3	Cj0777	Cj0777	Putative ATP-dependent DNA helicase	5	5	7	7	0.960443	0.978513	1.49793	2.38431	1.4553	0.087139	Q0PAB3	Cj0777	12	10	12	1.45295	1.19784	1.88148	1.51076	0.0626
Q0PAB2	Cj0778	peb2 Cj0778	Major antigenic peptide PEB2	28	28	21	21	0.797154	0.466654	0.637751	0.673733	0.643823	0.0253	Q0PAB2	Cj0778	34	34	34	0.67144	0.599499	0.591782	0.620907	0.0001
Q9PPE0	Cj0779	tpx Cj0779	Probable thiol peroxidase (EC 1.11.1.-)	25	25	24	24	0.746678	0.789023	0.659965	0.620373	0.70401	0.0072512	Q9PPE0	Cj0779	27	25	24	0.696155	0.599499	0.692698	0.662784
Q9PPD9	Cj0780	napA Cj0780	Periplasmic nitrate reductase (EC 1.7.99.4)	108	108	100	100	1.25699	1.1524	1.3105	1.17337	1.22331	0.0091	Q9PPD9	Cj0780	109	108	119	0.96386	0.976837	1.1504	1.03037	0.6401
Q0PAA9	Cj0781	napG Cj0781	Putative ferredoxin	15	15	18	18	1.06209	1.06621	0.980566	1.0384	1.03682	0.13772	Q0PAA9	Cj0781	21	18	20	1.39939	0.854371	1.10002	1.11793	0.4959
Q0PAA8	Cj0782	napH Cj0782	Putative ferredoxin	3	3	3	3	1.44748	1.41033	1.3086	1.49747	1.41597	0.0094789	Q0PAA8	Cj0782	ND	3	4	ND	0.864532	0.734929	0.79973	0.0904
Q0PAA7	Cj0783	napB Cj0783	Periplasmic nitrate reductase, electron transfer subunit (Diheme cytochrome c NapB)	10	10	9	9	1.09663	1.37255	1.31788	1.26531	1.26309	0.069148	Q0PAA7	Cj0783	12	12	12	1.72408	1.46564	1.01597	1.4019	0.124
Q0PAA6	Cj0784	napL Cj0784	Putative periplasmic protein	21	21	22	22	1.39216	1.41555	1.48799	2.21127	1.62674	ND	Q0PAA6	Cj0784	7	7	7	1.75815	1.7587	1.61623	1.71103	0.00012
Q0PAA5	Cj0785	napD Cj0785	Chaperone NapD (NapA signal peptide-binding chaperone NapD)	4	4	5	5	1.44766	1.53252	1.32341	1.35227	1.41396	0.0092396	Q0PAA5	Cj0785	5	4	5	1.02736	1.25912	1.54866	1.27838	0.1386
Q0PAA3	Cj0787	Cj0787	Putative uncharacterized protein (Tetricopeptide repeat protein)	8	8	11	11	1.3423	1.3305	1.84046	2.00535	1.62965	0.049583	Q0PAA3	Cj0787	4	4	4	1.36696	1.9033	1.99494	1.75507	0.0182
Q0PAA2	Cj0788	ciaD Cj0788	Putative uncharacterized protein	13	13	10	10	1.62677	1.41233	1.53363	1.35966	1.4831	0.0017552	Q0PAA2	Cj0788	10	10	10	2.18378	0.877233	0.988138	1.34972	0.4501
Q0PAA1	Cj0789	cca Cj0789	Putative multifunctional Cca protein	14	14	7	7	1.26631	1.32644	1.18427	2.24186	1.50472	ND	Q0PAA1	Cj0789	11	11	11	0.947458	1.79342	3.43376	2.05821	0.2207
Q0PAA0	Cj0790	purU Cj0790	Formyltetrahydrofolate deformylase (EC 3.5.1.10)	10	10	16	16	1.46512	1.48077	1.38571	1.67303	1.50116	ND	Q0PAA0	Cj0790	9	9	9	1.20608	2.08834	1.25912	1.51785	0.1441
Q0PA99	Cj0791c	Cj0791c	Putative aminotransferase	15	15	16	16	0.832609	0.964236	0.887693	0.905726	0.897566	0.078894	Q0PA99	Cj0791c	20	16	19	0.878364	1.17464	0.902635	0.985211	0.8838
Q0PA98	Cj0792	Cj0792	Putative uncharacterized protein (DUF234 domain-containing protein)	1	1	1	1	1.0333	1.06093	1.05862	1.19961	1.08812	0.37752	Q0PA98	Cj0792	ND	ND	3	ND	ND	1.06182	1.06182	ND
Q0PA97	Cj0793	flgS Cj0793	Signal transduction histidine kinase	22	22	20	20	1.22811	1.16294	1.15878	1.15175	1.1754	0.014446	Q0PA97	Cj0793	12	12	12	1.46624	0.86965	1.08723	1.14104	0.4638
Q0PA96	Cj0794	Cj0794	Putative uncharacterized protein	1	1	2	2	1.06775	1.06069	1.42111	1.40337	1.23823	0.60469	Q0PA96	Cj0794	ND	ND	ND	ND	ND	ND	ND	ND
Q0PA95	Cj0795c	murF Cj0795c	UDP-N-acetylmuramoyl-tripeptide D-alanyl-D-alanine ligase (EC 6.3.2.10)	10	10	9	9	0.89582	1.78252	0.997463	1.86718	1.38575	0.2275	Q0PA95	Cj0795c	10	9	12	1.52767	2.86595	2.57815	2.32393	0.0312
Q0PA94	Cj0796c	Cj0796c	Putative hydrolase	7	7	6	6	0.741017	0.780591	0.493518	0.571404	0.646632	0.0261	Q0PA94	Cj0796c	7	7	5	1.09404	0.477567	0.365736	0.645782	0.1928
Q0PA93	Cj0797c	Cj0797c	Antitoxin	3	3	3	3	1.51746	1.26073	1.17442	1.04865	1.25031	0.1676	Q0PA93	Cj0797c	ND	ND	1	ND	ND	0.918448	0.918448	ND
Q9PPC2	Cj0798c	ddl ddlA Cj0798c	D-alanine--D-alanine ligase (EC 6.3.2.4) (D-Ala-D-Ala ligase) (D-alanylalanine synthetase)	21	21	21	21	0.992565	1.0214	0.950321	0.981574	0.986464	ND	Q9PPC2	Cj0798c	20	21	21	1.91249	0.774776	0.856465	1.18124	0.6468
Q9PPC1	Cj0799c	ruvA Cj0799c	Holliday junction ATP-dependent DNA helicase RuvA (EC 3.6.4.12)	5	5	7	7	0.921297	0.933806	0.804574	0.847589	0.876816	0.0554	Q9PPC1	Cj0799c	6	7	5	0.715913	0.697722	0.74395	0.719195	2.1e-05
Q0PA90	Cj0800c	Cj0800c	Putative ATPase	33	33	41	41	1.22147	1.09287	1.27787	1.10912	1.17533	0.0586	Q0PA90	Cj0800c	35	33	33	1.03377	0.969529	1.05158	1.01829	0.5036
Q9PPB8	Cj0802	cysS Cj0802	Cysteine--tRNA ligase (EC 6.1.1.16) (Cysteinyl-tRNA synthetase) (CysRS)	44	44	45	45	1.24026	1.05596	1.15911	1.06038	1.12893	0.18142	Q9PPB8	Cj0802	30	32	35	1.49479	1.199	0.943247	1.21234	0.2535
Q0PA87	Cj0803	msbA Cj0803	Lipid export ABC transport protein	15	15	15	15	1.34335	1.57912	1.19557	0.939686	1.26443	0.2586	Q0PA87	Cj0803	15	16	18	1.71657	2.70665	3.2715	2.56491	0.0262
Q0PA86	Cj0804	pyrD Cj0804	Dihydroorotate dehydrogenase (EC 1.3.3.1)	23	23	19	19	0.73865	0.76557	0.802393	0.784487	0.772775	0.0051403	Q0PA86	Cj0804	21	23	19	0.720203	0.705343	0.756666	0.727404	2.4e-05
Q0PA85	Cj0805	Cj0805	Putative zinc protease	20	20	19	19	0.73537	0.823553	0.724212	0.811221	0.773589	0.028053	Q0PA85	Cj0805	20	20	24	0.715205	0.720254	1.00628	0.813913	0.1252
Q9PPB4	Cj0806	dapA Cj0806	4-hydroxy-tetrahydrodipicolinate synthase (HTPA synthase) (EC 4.3.3.7)	30	30	26	26	1.0737	1.01251	1.23039	1.01467	1.08282	0.14823	Q9PPB4	Cj0806	26	30	29	0.754631	1.11328	1.0073	0.958405	0.7157
Q0PA83	Cj0807	Cj0807	Putative oxidoreductase	16	16	17	17	0.737256	0.839866	0.866886	0.921504	0.841378	0.054873	Q0PA83	Cj0807	16	15	15	0.846687	1.04885	0.784937	0.893493	0.2524
Q0PA81	Cj0809c	Cj0809c	Putative hydrolase	6	6	5	5	0.999466	0.942509	0.942724	0.771154	0.913963	0.15125	Q0PA81	Cj0809c	ND	3	3	ND	0.753607	0.652752	0.70318	0.042
Q9PPB0	Cj0810	nadE Cj0810	NH(3)-dependent NAD(+) synthetase (EC 6.3.1.5)	21	21	23	23	0.894403	0.928581	0.905287	0.951506	0.919944	0.0137	Q9PPB0	Cj0810	14	14	14	0.768739	1.16796	0.888241	0.941646	0.6477
Q9PPA9	Cj0811	lpxK Cj0811	Tetraacyldisaccharide 4'-kinase (EC 2.7.1.130) (Lipid A 4'-kinase)	6	6	7	7	0.822147	0.803769	0.628223	0.853622	0.77694	0.0425	Q9PPA9	Cj0811	6	9	7	1.35097	1.30647	1.27775	1.31173	0.1417
Q0PA78	Cj0812	thrC Cj0812	Threonine synthase (EC 4.2.3.1)	51	51	48	48	1.1614	1.05838	1.13717	1.02852	1.09637	0.078752	Q0PA78	Cj0812	32	32	32	0.792134	0.861145	0.934853	0.862711	0.0291
Q0PA77	Cj0813	kdsB Cj0813	3-deoxy-manno-octulosonate cytidylyltransferase (EC 2.7.7.38)	28	28	28	28	1.10597	1.05377	1.10734	1.03006	1.07428	0.09228	Q0PA77	Cj0813	22	28	24	1.26826	0.70873	0.658068	0.878351	0.5675
Q0PA73	Cj0817	glnH Cj0817	Putative glutamine binding periplasmic protein	13	13	15	15	1.17825	1.00486	1.09786	1.05281	1.08345	0.2058	Q0PA73	Cj0817	17	18	19	1.00035	1.00086	1.07807	1.02643	0.364
Q0PA72	Cj0818	Cj0818	Putative lipoprotein	ND	ND	1	1	ND	ND	0.842168	1.06706	0.954614	ND	Q0PA72	Cj0818	ND	ND	ND	ND	ND	ND	ND	ND
Q0PA70	Cj0820c	fliP Cj0820c	Flagellar biosynthesis protein	3	3	2	2	0.948954	0.879646	0.758624	0.730345	0.829392	0.0911	Q0PA70	Cj0820c	ND	2	6	ND	0.971222	0.982111	0.976667	0.0504
Q9PPA2	Cj0821	glmU Cj0821	Bifunctional protein GlmU [Includes: UDP-N-acetylglucosamine pyrophosphorylase (EC 2.7.7.23) (N-acetylglucosamine-1-phosphate uridyltransferase); Glucosamine-1-phosphate N-acetyltransferase (EC 2.3.1.157)]	24	24	21	21	0.728276	0.806664	0.794504	0.824416	0.788465	0.0026	Q9PPA2	Cj0821	35	35	35	0.876756	0.782397	0.988079	0.882411	0.119
Q0PA68	Cj0822	dfp Cj0822	Phosphopantothenoylcysteine decarboxylase (EC 4.1.1.36) (Coenzyme A biosynthesis bifunctional protein CoaBC (DNA/pantothenate metabolism flavoprotein))	9	9	13	13	1.05867	1.044	0.969978	1.02493	1.02439	0.49897	Q0PA68	Cj0822	18	17	17	1.66893	1.01187	1.23018	1.30366	0.1911
Q0PA67	Cj0823	Cj0823	Putative uncharacterized protein (LAGLIDADG_2 domain-containing protein)	ND	ND	3	3	ND	ND	1.06694	1.43293	1.24994	ND	Q0PA67	Cj0823	ND	2	ND	ND	0.925506	ND	0.925506	ND
Q9PP99	Cj0824	uppS Cj0824	Isoprenyl transferase (EC 2.5.1.-)	8	8	7	7	0.908721	0.810238	0.793162	0.880871	0.848248	0.0217	Q9PP99	Cj0824	10	8	8	0.880963	0.997471	1.31021	1.06288	0.6494
Q0PA64	Cj0826	Cj0826	Putative integral membrane protein	1	1	2	2	0.694583	0.708016	1.2502	1.14778	0.950144	0.6552	Q0PA64	Cj0826	ND	2	4	ND	1.2896	0.97452	1.13206	0.3426
Q9PP96	Cj0827	truA Cj0827	tRNA pseudouridine synthase A (EC 5.4.99.12) (tRNA pseudouridine(38-40) synthase) (tRNA pseudouridylate synthase I) (tRNA-uridine isomerase I)	2	2	2	2	0.992657	0.936406	0.902532	0.898092	0.932422	0.21811	Q9PP96	Cj0827	ND	ND	ND	ND	ND	ND	ND	ND
Q0PA62	Cj0828c	ilvA Cj0828c	Threonine dehydratase biosynthetic (EC 4.3.1.19)	16	16	19	19	0.884837	0.905857	0.839226	0.791926	0.855461	0.0191	Q0PA62	Cj0828c	18	18	18	0.76991	0.966988	1.15363	0.96351	0.7584
Q0PA61	Cj0829c	Cj0829c	Putative CoA binding domain containing protein	7	7	8	8	0.84657	0.915853	0.919584	0.870843	0.888212	0.014289	Q0PA61	Cj0829c	6	7	7	1.29732	1.45641	1.4373	1.39701	0.0014
Q9PP92	Cj0831c	trmA Cj0831c	tRNA (uracil(54)-C(5))-methyltransferase (EC 2.1.1.35) (tRNA(m5U54)-methyltransferase) (RUMT)	14	14	15	15	0.965327	0.956718	0.787281	0.919769	0.907274	0.080608	Q9PP92	Cj0831c	10	10	10	1.1339	1.14142	0.816424	1.03058	0.7894
Q0PA58	Cj0832c	Cj0832c	Putative Na+/H+ antiporter family protein	3	3	4	4	0.640673	0.866922	0.781128	0.909866	0.799647	0.054566	Q0PA58	Cj0832c	4	3	4	0.698455	0.813101	1.48343	0.998328	0.9949
Q0PA57	Cj0833c	Cj0833c	Putative oxidoreductase	28	28	27	27	0.564385	0.748282	0.593438	0.58846	0.623641	0.0165182	Q0PA57	Cj0833c	24	24	24	0.671452	0.585104	0.644569	0.633709	0.000156
Q0PA56	Cj0834c	Cj0834c	Ankyrin repeat-containing putative periplasmic protein	28	28	25	25	1.84995	1.7818	1.53902	1.59614	1.69173	0.0032402	Q0PA56	Cj0834c	19	19	19	1.01153	0.952781	0.818807	0.927707	0.3986
Q0PA55	Cj0835c	acnB Cj0835c	Aconitate hydratase 2 (EC 4.2.1.3)	100	99	92	91	0.877523	0.688527	0.712473	0.579588	0.714528	0.0365	Q0PA55	Cj0835c	86	91	85	0.460882	0.570709	0.602864	0.544819	0.0004
Q0PA54	Cj0836	ogt Cj0836	Methylated-DNA--protein-cysteine methyltransferase (EC 2.1.1.63) (6-O-methylguanine-DNA methyltransferase) (O-6-methylguanine-DNA-alkyltransferase)	2	2	2	2	1.03265	1.22691	1.22216	1.37455	1.21407	0.14042	Q0PA54	Cj0836	5	3	5	1.92443	2.40544	1.4581	1.92933	0.0273
Q0PA53	Cj0837c	Cj0837c	Putative uncharacterized protein (Ferrochelatase)	5	5	6	6	1.32841	1.23927	1.67544	1.27203	1.37879	0.051888	Q0PA53	Cj0837c	ND	3	3	ND	2.35602	1.38952	1.87277	0.0939
Q9PP85	Cj0838c	metG metS Cj0838c	Methionine--tRNA ligase (EC 6.1.1.10) (Methionyl-tRNA synthetase) (MetRS)	49	49	50	50	1.19329	1.04092	1.20595	1.11616	1.13908	0.0725	Q9PP85	Cj0838c	41	44	41	1.02939	0.823041	0.854142	0.90219	0.2025
Q0PA51	Cj0839c	Cj0839c	Putative uncharacterized protein	ND	ND	1	1	ND	ND	0.916541	1.2148	1.06567	ND	Q0PA51	Cj0839c	ND	ND	2	ND	ND	1.28198	1.28198	ND
Q0PA50	Cj0840c	fbp Cj0840c	Fructose-1,6-bisphosphatase class 1 (FBPase class 1) (EC 3.1.3.11) (D-fructose-1,6-bisphosphate 1-phosphohydrolase class 1)	23	23	23	23	0.976582	0.9232	1.0042	0.999764	0.975936	0.65991	Q0PA50	Cj0840c	16	16	16	1.31725	0.966988	1.05239	1.11221	0.3472
Q0PA49	Cj0841c	mobB Cj0841c	Putative molybdopterin-guanine dinucleotide biosynthesis protein	12	12	12	12	1.25173	1.16321	1.18618	1.1791	1.19506	0.031988	Q0PA49	Cj0841c	6	9	7	1.78898	1.10501	1.42776	1.44058	0.0896
Q0PA48	Cj0842	Cj0842	Putative lipoprotein	3	3	3	3	1.0204	0.846994	0.776578	0.760447	0.851105	0.1705	Q0PA48	Cj0842	6	4	3	0.868977	1.02203	0.99515	0.962052	0.4663
Q0PA47	Cj0843c	Cj0843c	Putative secreted transglycosylase	31	31	28	28	1.02514	1.43283	1.51097	1.95156	1.48012	0.0855	Q0PA47	Cj0843c	31	32	34	1.5109	1.33786	2.17981	1.67619	0.0379
Q9PP78	Cj0845c	gltX1 gltX2 Cj0845c	Glutamate--tRNA ligase 1 (EC 6.1.1.17) (Glutamyl-tRNA synthetase 1) (GluRS 1)	41	41	39	39	1.20627	1.16337	1.18581	1.18828	1.18593	0.0083296	Q9PP78	Cj0845c	30	33	31	0.916879	0.821189	1.19012	0.976063	0.8392
Q9PP77	Cj0846	Cj0846	Uncharacterized metallophosphoesterase Cj0846 (EC 3.1.-.-)	7	7	9	9	0.869115	0.804188	0.715491	0.725559	0.778588	0.022965	Q9PP77	Cj0846	7	7	7	1.68151	0.718891	1.00308	1.13449	0.6622
Q9PP76	Cj0847	psd Cj0847	Phosphatidylserine decarboxylase proenzyme (EC 4.1.1.65) [Cleaved into: Phosphatidylserine decarboxylase alpha chain; Phosphatidylserine decarboxylase beta chain]	12	12	10	10	0.912992	0.902414	0.902886	0.954777	0.918267	0.064898	Q9PP76	Cj0847	12	12	12	1.58037	0.856064	0.736415	1.05761	0.8377
Q0PA42	Cj0848c	flhB Cj0848c	Putative uncharacterized protein (FlhB-like flagellar biosynthesis protein)	5	5	7	7	1.286	1.34832	1.1633	1.44591	1.31089	0.0249	Q0PA42	Cj0848c	ND	2	2	ND	0.811186	0.491208	0.651197	0.0612
Q0PA41	Cj0849c	fliK Cj0849c	Putative uncharacterized protein (Flagellar hook-length control protein FliK)	27	27	24	24	1.16821	1.2384	1.24826	1.13707	1.19798	0.002245	Q0PA41	Cj0849c	37	35	33	1.90679	1.14904	1.01857	1.35813	0.2655
Q0PA40	Cj0850c	Cj0850c	Putative MFS (Major Facilitator Superfamily) transport protein	ND	ND	ND	ND	ND	ND	ND	ND	ND	ND	Q0PA40	Cj0850c	ND	ND	1	ND	ND	1.32205	1.32205	ND
Q0PA38	Cj0852c	Cj0852c	Putative integral membrane protein	ND	ND	ND	ND	ND	ND	ND	ND	ND	ND	Q0PA38	Cj0852c	ND	2	2	ND	1.00509	0.405875	0.705483	0.4292
Q9PP70	Cj0853	hemL Cj0853	Glutamate-1-semialdehyde 2,1-aminomutase (GSA) (EC 5.4.3.8) (Glutamate-1-semialdehyde aminotransferase) (GSA-AT)	24	24	22	22	0.766583	0.733725	0.707411	0.734094	0.735453	0.002245	Q9PP70	Cj0853	26	26	26	1.04196	0.661958	0.872999	0.858973	0.2688
Q0PA36	Cj0854c	Cj0854c	Putative periplasmic protein	7	7	6	6	1.14391	1.05474	1.2453	0.940056	1.096	0.3802	Q0PA36	Cj0854c	ND	2	3	ND	1.20662	1.0281	1.11736	0.3191
Q0PA35	Cj0855	folD Cj0855	Bifunctional protein FolD [Includes: Methylenetetrahydrofolate dehydrogenase (EC 1.5.1.5); Methenyltetrahydrofolate cyclohydrolase (EC 3.5.4.9)]	20	19	21	20	1.1753	1.15521	1.12789	1.10705	1.14136	0.0085291	Q0PA35	Cj0855	14	14	13	1.71596	1.47577	0.709576	1.30043	0.3782
Q0PA34	Cj0856	lepP Cj0856	Signal peptidase I (EC 3.4.21.89)	10	10	11	11	0.878003	0.897415	0.88289	1.02132	0.919906	0.21127	Q0PA34	Cj0856	17	17	17	1.18984	1.01864	0.746043	0.984842	0.9123
Q0PA33	Cj0857c	moeA Cj0857c	Putative molybdopterin biosynthesis protein (Molybdopterin molybdenumtransferase (EC 2.10.1.1))	24	24	23	23	1.26653	1.14765	1.22382	1.18518	1.2058	0.0093379	Q0PA33	Cj0857c	11	10	11	1.8414	1.15666	1.24715	1.41507	0.1254
Q9PP65	Cj0858c	murA Cj0858c	UDP-N-acetylglucosamine 1-carboxyvinyltransferase (EC 2.5.1.7) (Enoylpyruvate transferase) (UDP-N-acetylglucosamine enolpyruvyl transferase) (EPT)	32	32	33	33	0.957961	1.00685	0.996703	1.02984	0.997838	0.47367	Q9PP65	Cj0858c	20	21	21	0.95358	0.988741	1.10501	1.01578	0.7476
Q0PA31	Cj0859c	Cj0859c	Putative uncharacterized protein (Flagellar secreted protein)	7	7	8	8	0.725809	0.716075	0.312793	0.4082	0.540719	0.0445	Q0PA31	Cj0859c	ND	3	3	ND	0.548694	0.402932	0.475813	0.0188
Q0PA28	Cj0862c	pabB Cj0862c	Para-aminobenzoate synthase component I (EC 4.1.3.-) (EC 6.3.5.8)	2	2	7	6	1.06249	1.19363	1.33719	1.20642	1.19993	0.17374	Q0PA28	Cj0862c	14	6	ND	1.39883	2.05002	ND	1.72443	0.0584
Q0PA27	Cj0863c	xerD Cj0863c	DNA recombinase (Tyrosine recombinase XerH)	2	2	4	4	0.819905	0.856135	0.817414	0.85924	0.838174	0.00775	Q0PA27	Cj0863c	ND	4	5	ND	1.62153	2.28533	1.95343	0.0309
Q0PA24	Cj0872	dsbA Cj0872	Thiol:disulfide interchange protein DsbA	19	19	14	14	1.37087	1.24198	1.40411	1.20537	1.30558	0.0136	Q0PA24	Cj0872	12	12	12	0.95428	0.889087	1.08745	0.976939	0.7129
Q0PA20	Cj0877c	Cj0877c	Putative uncharacterized protein	1	1	1	1	2.16454	1.58161	1.4318	1.4716	1.66239	ND	Q0PA20	Cj0877c	ND	ND	ND	ND	ND	ND	ND	ND
Q0PA18	Cj0879c	Cj0879c	Putative periplasmic protein	7	7	7	7	0.999467	0.895675	0.956842	0.73877	0.897688	0.12642	Q0PA18	Cj0879c	7	7	7	1.25063	0.792558	0.903079	0.982089	0.903
Q0PA17	Cj0880c	Cj0880c	Putative uncharacterized protein (Cell division protein)	3	3	3	3	1.47649	1.23298	1.66823	1.23933	1.40426	0.0307	Q0PA17	Cj0880c	ND	ND	ND	ND	ND	ND	ND	ND
Q0PA16	Cj0881c	Cj0881c	Putative uncharacterized protein (DHH family phosphoesterase)	11	11	14	14	0.939746	0.973765	0.915522	0.954841	0.945969	0.17764	Q0PA16	Cj0881c	11	10	9	1.33313	0.993238	1.29379	1.20672	0.1264
Q0PA15	Cj0882c	flhA Cj0882c	Flagellar biosynthesis protein FlhA	5	5	4	4	0.986231	1.8811	1.05655	1.24475	1.29216	0.3933	Q0PA15	Cj0882c	14	14	14	1.65627	1.33532	1.48551	1.49237	0.006
Q0PA14	Cj0883c	Cj0883c	Putative transcriptional regulator	10	10	12	12	1.51752	1.31329	1.45965	1.35471	1.41129	0.0044619	Q0PA14	Cj0883c	ND	3	4	ND	0.98477	1.19746	1.09112	0.3337
Q0PA13	Cj0884	rpsO Cj0884	30S ribosomal protein S15	13	13	10	10	0.976656	1.05161	1.1209	1.19416	1.08583	0.2868	Q0PA13	Cj0884	13	13	14	1.3001	1.42161	0.611353	1.11102	0.6826
Q0PA12	Cj0886c	ftsK ftsQ Cj0886c	DNA translocase FtsK	51	51	49	49	1.14704	1.12052	1.10689	1.13397	1.1271	0.0017552	Q0PA12	Cj0886c	56	51	55	1.21791	0.98477	0.929982	1.04422	0.6427
Q0PA11	Cj0887c	flaD Cj0887c	Putative flagellin	6	6	6	6	2.05574	1.35703	1.93497	1.45904	1.7017	0.0099329	Q0PA11	Cj0887c	13	13	13	3.36627	1.43693	2.04854	2.28391	0.0387
Q0PA10	Cj0888c	Cj0888c	ABC transport system ATP-binding protein	16	16	13	13	0.994093	0.994467	1.47708	1.43277	1.2246	0.38028	Q0PA10	Cj0888c	20	16	19	1.84329	1.45302	1.37873	1.55835	0.0179
Q0PA09	Cj0889c	phosS Cj0889c	Putative sensory trasnduction histidine kinase	1	1	1	1	0.707066	0.634031	0.676453	0.822743	0.710073	0.020119	Q0PA09	Cj0889c	ND	ND	ND	ND	ND	ND	ND	ND
Q0PA08	Cj0890c	phosR Cj0890c	Putative sensory transduction transcriptional regulator	6	6	8	8	1.65929	1.34964	1.35382	1.25193	1.40367	0.0382	Q0PA08	Cj0890c	2	2	2	1.83368	1.19646	1.15054	1.39356	0.1488
Q0PA07	Cj0891c	serA Cj0891c	D-3-phosphoglycerate dehydrogenase (EC 1.1.1.95)	47	47	42	42	1.04736	0.924874	0.802836	0.727663	0.875683	0.3031	Q0PA07	Cj0891c	47	47	47	0.781488	0.768849	0.691676	0.747338	0.0008
Q0PA06	Cj0892c	Cj0892c	Putative periplasmic protein	ND	ND	2	2	ND	ND	0.997407	1.4952	1.2463	0.4267	Q0PA06	Cj0892c	6	4	6	1.67696	1.57749	1.73466	1.66304	0.0001
Q0PA05	Cj0893c	rpsA Cj0893c	30S ribosomal protein S1	67	67	59	59	0.765113	0.804407	0.842321	0.844281	0.81403	0.016281	Q0PA05	Cj0893c	78	77	77	0.671158	0.96944	0.703649	0.781416	0.0817
P0C632	Cj0894c	ispH lytB Cj0894c	4-hydroxy-3-methylbut-2-enyl diphosphate reductase (EC 1.17.1.2)	18	18	16	16	1.24429	1.28342	1.21468	1.38343	1.28146	0.0082434	P0C632	Cj0894c	25	24	22	1.8285	1.40137	1.30018	1.51002	0.0345
P0C630	Cj0895c	aroA Cj0895c	3-phosphoshikimate 1-carboxyvinyltransferase (EC 2.5.1.19) (5-enolpyruvylshikimate-3-phosphate synthase) (EPSP synthase) (EPSPS)	29	29	24	24	1.17513	1.00912	1.16405	1.07293	1.10531	0.12836	P0C630	Cj0895c	19	22	20	0.995019	1.25086	1.08128	1.10905	0.2204
Q9PP35	Cj0896	pheT Cj0896	Phenylalanine--tRNA ligase beta subunit (EC 6.1.1.20) (Phenylalanyl-tRNA synthetase beta subunit) (PheRS)	54	54	50	50	0.927026	0.977173	0.934001	1.01696	0.963789	0.35254	Q9PP35	Cj0896	52	52	52	1.19168	0.9509	0.851742	0.998109	0.9859
Q9PP34	Cj0897	pheS Cj0897	Phenylalanine--tRNA ligase alpha subunit (EC 6.1.1.20) (Phenylalanyl-tRNA synthetase alpha subunit) (PheRS)	24	24	23	23	1.02195	1.04783	1.03667	1.09821	1.05116	0.16822	Q9PP34	Cj0897	21	21	21	0.743035	1.05433	1.02626	0.94121	0.5861
Q0PA00	Cj0898	Cj0898	Putative histidine triad (HIT) family protein	8	8	8	8	1.23416	1.09185	1.39437	1.26129	1.24542	0.0577	Q0PA00	Cj0898	8	8	10	0.713416	1.09061	0.673604	0.825878	0.2602
Q0P9Z9	Cj0899c	thiJ Cj0899c	4-methyl-5(Beta-hydroxyethyl)-thiazole monophosphate synthesis protein	18	18	16	16	0.846924	0.809691	1.03742	0.938017	0.908012	0.15554	Q0P9Z9	Cj0899c	11	11	11	0.654752	0.920417	0.67185	0.749006	0.0431
Q0P9Z7	Cj0901	Cj0901	Putative amino acid ABC tansporter permease protein	2	2	3	3	1.01225	0.928193	0.761349	0.893407	0.898799	0.25016	Q0P9Z7	Cj0901	ND	2	4	ND	1.2371	1.07193	1.15452	0.0869
Q0P9Z6	Cj0902	glnQ Cj0902	Putative glutamine transport ATP-binding protein	12	12	14	14	0.841711	0.84145	0.933083	0.929013	0.886314	0.0427	Q0P9Z6	Cj0902	23	20	16	1.11256	0.860298	0.956275	0.976378	0.7641
Q0P9Z5	Cj0903c	Cj0903c	Putative amino-acid transport protein	12	12	9	9	0.655292	0.872137	0.653321	0.635781	0.704133	0.0246	Q0P9Z5	Cj0903c	17	13	16	0.437154	0.8857	0.792509	0.705121	0.0971
Q0P9Z4	Cj0904c	trmL Cj0904c	tRNA (cytidine(34)-2'-O)-methyltransferase (EC 2.1.1.207) (tRNA (cytidine/uridine-2'-O-)-methyltransferase TrmL)	7	7	5	5	1.28744	0.934618	1.16973	0.849054	1.06021	0.75263	Q0P9Z4	Cj0904c	ND	3	5	ND	1.01441	1.0333	1.02385	0.1275
Q9PP26	Cj0905c	alr Cj0905c	Alanine racemase (EC 5.1.1.1)	14	14	14	14	0.971452	0.897057	0.98955	0.845203	0.925815	0.21811	Q9PP26	Cj0905c	14	14	14	1.76024	0.900942	1.5452	1.40213	0.1943
Q0P9Z2	Cj0906c	pgp2 Cj0906c	Putative periplasmic protein	29	29	22	22	0.712799	0.759292	0.747124	0.790817	0.752508	0.0042765	Q0P9Z2	Cj0906c	39	37	37	0.707942	0.904537	0.879773	0.830751	0.052
Q0P9Z1	Cj0908	Cj0908	Putative periplasmic protein	2	2	2	2	1.10263	1.21769	0.697905	0.907144	0.981341	0.9185	Q0P9Z1	Cj0908	ND	ND	ND	ND	ND	ND	ND	ND
Q0P9Z0	Cj0909	Cj0909	Putative periplasmic protein	7	7	6	6	0.695187	0.678752	0.26153	0.280443	0.478978	0.0446	Q0P9Z0	Cj0909	10	7	9	0.446965	0.387811	0.31782	0.384199	4.4e-05
Q0P9Y9	Cj0910	Cj0910	Putative periplasmic protein	4	4	5	5	1.45019	1.24589	1.33004	1.14705	1.29329	0.01362	Q0P9Y9	Cj0910	7	6	7	2.26681	1.62891	2.26014	2.05195	0.0076
Q0P9Y8	Cj0911	Cj0911	Putative periplasmic protein	5	5	3	3	1.87274	2.05425	0.967921	1.17696	1.51797	0.071852	Q0P9Y8	Cj0911	5	5	5	1.92885	1.86857	1.41628	1.7379	0.0103
P71128	Cj0912c	cysM Cj0912c	Cysteine synthase B (CSase B) (EC 2.5.1.47) (O-acetylserine (thiol)-lyase B) (OAS-TL B) (O-acetylserine sulfhydrylase B)	34	34	33	33	0.796065	0.777924	0.880888	0.764916	0.804948	0.012057	P71128	Cj0912c	24	24	24	1.21679	0.832355	0.83774	0.962296	0.7818
Q46121	Cj0913c	hup hupB Cj0913c	DNA-binding protein HU (HCj)	11	11	11	11	0.62396	0.63129	0.760252	0.606749	0.655563	0.0093379	Q46121	Cj0913c	19	16	18	0.280773	0.548694	0.27277	0.367412	0.0022
Q0P9Y5	Cj0914c	ciaB Cj0914c	CiaB protein	56	56	53	53	0.88857	0.908096	0.908333	0.955321	0.91508	0.018791	Q0P9Y5	Cj0914c	31	34	33	0.993072	0.918097	1.02965	0.980272	0.5803
Q0P9Y4	Cj0915	Cj0915	Putative hydrolase	10	10	8	8	1.17304	1.00827	1.00565	0.99636	1.04583	0.40413	Q0P9Y4	Cj0915	8	8	8	1.45939	1.07622	0.749085	1.0949	0.6679
Q0P9Y3	Cj0916c	Cj0916c	Putative uncharacterized protein	1	1	ND	ND	1.36294	0.91795	ND	ND	1.14044	ND	Q0P9Y3	Cj0916c	ND	ND	ND	ND	ND	ND	ND	ND
Q0P9Y2	Cj0917c	cstA Cj0917c	Putative integral membrane protein (CstA homolog)	11	11	13	13	0.78702	0.723422	0.759264	0.656399	0.755221	0.0032	Q0P9Y2	Cj0917c	19	17	17	0.812734	0.707883	0.707339	0.742652	0.0018
Q9PP15	Cj0918c	prs prsA Cj0918c	Ribose-phosphate pyrophosphokinase (RPPK) (EC 2.7.6.1) (Phosphoribosyl pyrophosphate synthase) (P-Rib-PP synthase) (PRPP synthase)	25	25	23	23	1.34539	1.28366	1.21535	1.27869	1.28077	0.0034443	Q9PP15	Cj0918c	29	29	29	1.61522	1.02965	0.786376	1.14375	0.5903
Q0P9Y0	Cj0919c	Cj0919c	Putative ABC-type amino-acid transporter permease protein	1	1	1	1	0.642172	0.979149	0.620316	0.850468	0.773026	0.13831	Q0P9Y0	Cj0919c	ND	ND	ND	ND	ND	ND	ND	ND
Q0P9X9	Cj0920c	Cj0920c	Putative ABC-type amino-acid transporter permease protein	4	4	4	4	0.966141	0.93562	0.944875	0.924768	0.942851	0.062846	Q0P9X9	Cj0920c	ND	4	4	ND	1.49109	1.05336	1.27222	0.1938
Q0P9X8	Cj0921c	peb1A Cj0921c	Major cell-binding factor (CBF1) (PEB1)	60	60	54	54	0.882101	0.443743	0.42314	0.477108	0.556523	0.0268	Q0P9X8	Cj0921c	44	45	44	0.415442	0.342934	0.340731	0.366369	2.4e-05
Q0P9X7	Cj0922c	peb1C pebC Cj0922c	Probable ABC transporter ATP-binding protein PEB1C	21	21	20	20	0.654364	0.642259	0.512633	0.500836	0.577523	0.00241	Q0P9X7	Cj0922c	18	20	21	0.599893	0.514824	0.624982	0.5799	0.00023
Q0P9X6	Cj0923c	cheR Cj0923c	Chemotaxis protein methyltransferase (EC 2.1.1.80)	27	27	23	23	0.969145	0.967439	1.04835	1.02124	1.00154	0.65491	Q0P9X6	Cj0923c	21	23	23	1.19386	0.969529	0.946191	1.03653	0.6677
Q0P9X5	Cj0924c	cheB' Cj0924c	Putative MCP protein-glutamate methylesterase (EC 3.1.1.61)	10	10	10	10	1.16818	1.7197	1.5003	1.63823	1.5066	0.0251	Q0P9X5	Cj0924c	7	7	7	1.70805	1.76171	2.06201	1.84393	0.00169
Q0P9X4	Cj0925	rpiB Cj0925	Ribose 5-phosphate isomerase (EC 5.3.1.6)	7	7	4	4	0.984138	0.874341	1.19038	0.984422	1.00832	0.82191	Q0P9X4	Cj0925	9	7	9	1.10449	1.06352	0.779777	0.982594	0.8729
Q0P9X3	Cj0926	Cj0926	Putative membrane protein	9	9	8	8	0.704613	0.686156	0.613322	0.583678	0.646942	0.0032342	Q0P9X3	Cj0926	13	11	12	0.692392	0.567959	0.743956	0.668102	0.0031
Q9PP06	Cj0927	apt Cj0927	Adenine phosphoribosyltransferase (APRT) (EC 2.4.2.7)	15	15	13	13	1.28565	1.23666	1.31898	1.18936	1.25766	0.013699	Q9PP06	Cj0927	ND	8	8	ND	1.12364	1.55815	1.34089	0.1259
Q0P9X1	Cj0928	Cj0928	Putative integral membrane protein (DedA family)	1	1	1	1	1.17551	1.3916	1.25029	1.17512	1.24813	0.12641	Q0P9X1	Cj0928	ND	ND	ND	ND	ND	ND	ND	ND
Q9PP04	Cj0929	pepA Cj0929	Probable cytosol aminopeptidase (EC 3.4.11.1) (Leucine aminopeptidase) (LAP) (EC 3.4.11.10) (Leucyl aminopeptidase)	27	27	26	26	0.786942	0.920496	0.742662	0.864519	0.828655	0.0449	Q9PP04	Cj0929	47	44	45	1.04366	1.06532	1.00848	1.03915	0.0773
Q0P9W9	Cj0930	Cj0930	Putative GTP-binding protein (Ribosome-binding ATPase YchF)	35	35	36	36	1.12339	1.05939	1.18568	1.07966	1.11203	0.072285	Q0P9W9	Cj0930	28	27	24	0.942994	1.05118	0.988021	0.994064	0.8592
Q46104	Cj0931c	argH Cj0931c	Argininosuccinate lyase (ASAL) (EC 4.3.2.1) (Arginosuccinase)	35	35	32	32	1.10168	1.11664	1.14386	1.16267	1.13121	0.0086212	Q46104	Cj0931c	21	25	24	1.03004	1.19542	1.05505	1.0935	0.1434
Q9PP01	Cj0932c	pckA Cj0932c	Phosphoenolpyruvate carboxykinase [ATP] (PEP carboxykinase) (PEPCK) (EC 4.1.1.49) (Phosphoenolpyruvate carboxylase)	61	61	63	63	0.99339	0.981734	1.04964	0.987579	1.00309	0.60093	Q9PP01	Cj0932c	56	59	61	0.81467	0.704496	0.80506	0.774742	0.0031
Q0P9W6	Cj0933c	pycB Cj0933c	Putative pyruvate carboxylase B subunit (EC 6.4.1.1)	49	49	48	48	0.874008	0.940162	0.885629	0.929819	0.907404	0.015373	Q0P9W6	Cj0933c	49	48	50	1.1332	0.94513	0.91703	0.998454	0.9829
Q0P9W3	Cj0936	atpE Cj0936	ATP synthase subunit c (ATP synthase F(0) sector subunit c)	1	1	1	1	0.52603	1.06213	0.508474	0.986675	0.770826	0.22306	Q0P9W3	Cj0936	ND	ND	1	ND	ND	0.708836	0.708836	ND
Q0P9W1	Cj0938c	aas Cj0938c	Putative 2-acylglycerophosphoethanolamine acyltransferase / acyl-acyl carrier protein synthetase	11	11	14	14	1.6755	1.89066	1.12866	2.92415	1.90474	0.03282	Q0P9W1	Cj0938c	26	24	23	1.46815	1.91267	1.89904	1.75995	0.0274
Q0P9W0	Cj0939c	Cj0939c	Putative uncharacterized protein (RCK N-terminal domain-containing protein)	6	6	11	11	0.721946	0.788343	0.93704	0.988621	0.858988	0.082362	Q0P9W0	Cj0939c	5	6	5	1.17764	1.12377	0.680202	0.993871	0.9708
Q0P9V8	Cj0941c	Cj0941c	Putative permease	3	3	2	2	1.15081	2.14068	1.52139	1.50582	1.57967	0.0668	Q0P9V8	Cj0941c	10	7	11	1.54185	1.50778	1.66048	1.57003	0.00026
Q0P9V7	Cj0942c	secA Cj0942c	Protein translocase subunit SecA	71	71	64	64	0.961409	1.01412	0.996436	1.02415	0.99903	0.35136	Q0P9V7	Cj0942c	93	84	91	0.911428	0.91449	0.901273	0.909063	0.0109
Q9PNZ0	Cj0943	lolA Cj0943	Outer-membrane lipoprotein carrier protein	7	7	7	7	1.29162	1.43276	1.16113	1.167	1.26313	0.0261	Q9PNZ0	Cj0943	8	7	8	1.03353	0.733285	1.22457	0.99713	0.9849
Q0P9V5	Cj0944c	Cj0944c	Putative periplasmic protein	15	15	17	17	1.226	1.23191	1.10431	1.20797	1.19255	0.01362	Q0P9V5	Cj0944c	14	14	14	1.08716	1.39798	1.40113	1.29543	0.047
Q0P9V4	Cj0945c	pif1 Cj0945c	ATP-dependent DNA helicase pif1	ND	1	3	3	ND	1.90237	1.14517	1.02676	1.3581	0.3816	Q0P9V4	Cj0945c	1	3	3	1.23452	1.20323	1.05812	1.16529	0.0997
Q0P9V3	Cj0946	Cj0946	Putative lipoprotein	7	7	7	7	1.51586	1.44054	1.14442	1.29809	1.34973	0.0467	Q0P9V3	Cj0946	19	16	18	1.83207	1.86985	1.75616	1.81936	0.00078
Q0P9V2	Cj0947c	Cj0947c	Putative carbon-nitrogen hydrolase	24	24	25	25	1.22191	1.08862	1.10792	1.04284	1.11532	0.1135	Q0P9V2	Cj0947c	15	15	15	0.951519	0.850137	1.23929	1.01365	0.9124
Q0P9V1	Cj0948c	Cj0948c	Putative cation efflux family protein	ND	ND	1	1	ND	ND	0.986056	1.06665	1.02635	ND	Q0P9V1	Cj0948c	ND	1	ND	ND	1.37343	ND	1.37343	ND
Q0P9V0	Cj0949c	Cj0949c	Putative peptidyl-arginine deiminase family protein	28	28	26	26	1.10653	1.04345	1.16801	1.07434	1.09808	0.07	Q0P9V0	Cj0949c	17	17	17	1.51069	1.2388	0.603122	1.11753	0.6846
Q0P9U9	Cj0950c	Cj0950c	Putative lipoprotein	12	12	13	13	0.866637	0.795306	0.796641	0.806616	0.8163	0.0025669	Q0P9U9	Cj0950c	16	16	16	0.892958	0.669779	0.615659	0.726132	0.0321
Q9PNY2	Cj0953c	purH Cj0953c	Bifunctional purine biosynthesis protein PurH [Includes: Phosphoribosylaminoimidazolecarboxamide formyltransferase (EC 2.1.2.3) (AICAR transformylase); IMP cyclohydrolase (EC 3.5.4.10) (ATIC) (IMP synthase) (Inosinicase)]	56	56	55	55	1.29251	1.07579	1.2815	1.06176	1.17789	0.057102	Q9PNY2	Cj0953c	36	36	36	0.673811	1.22338	0.805259	0.900816	0.5817
Q0P9U5	Cj0954c	Cj0954c	Putative DnaJ-like protein	9	9	6	6	0.801426	0.897771	0.703816	0.691682	0.773674	0.035	Q0P9U5	Cj0954c	2	2	2	0.846288	1.48774	0.715242	1.01642	0.9484
Q9PNY0	Cj0955	purL Cj0955	Phosphoribosylformylglycinamidine synthase 2 (EC 6.3.5.3) (Phosphoribosylformylglycinamidine synthase II) (FGAM synthase II)	54	54	53	53	1.05669	1.06995	1.07982	1.06845	1.06873	0.0090214	Q9PNY0	Cj0955	36	39	38	0.886262	1.06937	0.928406	0.961345	0.5235
Q9PNX9	Cj0956c	mnmE thdF trmE Cj0956c	tRNA modification GTPase MnmE (EC 3.6.-.-)	16	16	16	16	0.927397	0.934689	0.713218	0.826081	0.850346	0.1275	Q9PNX9	Cj0956c	14	14	14	1.48536	1.33024	1.10644	1.30735	0.0491
Q0P9U2	Cj0957c	Cj0957c	Putative uncharacterized protein (Jag_N domain-containing protein)	14	14	12	12	0.897343	0.990014	0.899018	0.932149	0.929631	0.14677	Q0P9U2	Cj0957c	24	24	24	1.10901	0.734132	0.976919	0.94002	0.6139
Q9PNX7	Cj0958c	yidC Cj0958c	Membrane protein insertase YidC (Foldase YidC) (Membrane integrase YidC) (Membrane protein YidC)	22	22	22	22	0.79006	0.891967	0.870803	0.880246	0.858269	0.0151	Q9PNX7	Cj0958c	27	21	26	0.980477	0.921104	1.09993	1.0005	0.9928
Q9PNX4	Cj0961c	rpmH Cj0961c	50S ribosomal protein L34	3	3	2	2	0.846264	0.756843	0.467581	0.637287	0.676994	0.582	Q9PNX4	Cj0961c	ND	3	5	ND	0.354788	0.087462	0.221125	0.0282
Q0P9T7	Cj0962	Cj0962	Putative acetyltransferase	8	8	8	8	1.18469	1.02281	1.16462	1.0028	1.09373	0.2551	Q0P9T7	Cj0962	ND	4	5	ND	0.943279	0.373605	0.658442	0.3533
Q0P9T6	Cj0963	Cj0963	Putative uncharacterized protein	2	2	1	1	1.35333	1.11978	1.81859	1.37705	1.41719	0.0646	Q0P9T6	Cj0963	ND	ND	ND	ND	ND	ND	ND	ND
Q0P9T5	Cj0964	Cj0964	Putative periplasmic protein	24	24	21	21	0.869553	0.901186	0.898081	0.945724	0.903636	0.0151	Q0P9T5	Cj0964	18	19	18	1.0917	0.863685	0.894296	0.949895	0.5218
Q0P9T4	Cj0965c	Cj0965c	Putative acyl-CoA thioester hydrolase (EC 3.1.2.-)	11	11	11	11	1.23507	1.06866	1.31571	1.10568	1.18128	0.1025	Q0P9T4	Cj0965c	10	10	10	0.743564	1.24624	0.81034	0.933381	0.6943
Q0P9S6	Cj0976	cmoB Cj0976	tRNA (mo5U34)-methyltransferase (EC 2.1.1.-)	17	17	16	16	1.42173	1.23844	1.60659	1.3717	1.40962	0.0231	Q0P9S6	Cj0976	6	8	6	1.24265	0.875084	1.12762	1.08179	0.4931
Q0P9S5	Cj0977	Cj0977	Putative uncharacterized protein (PaaI family thioesterase)	4	4	4	4	1.24365	1.28864	1.31127	1.46889	1.32811	0.0191	Q0P9S5	Cj0977	4	4	4	0.960904	1.6426	0.581717	1.06174	0.852
Q0P9S4	Cj0978c	Cj0978c	Putative lipoprotein	1	1	4	4	0.792019	0.749081	0.37709	0.570242	0.622108	0.0564	Q0P9S4	Cj0978c	ND	4	4	ND	0.436076	0.4887	0.462388	0.0024
Q0P9S3	Cj0979c	Cj0979c	Putative secreted nuclease	ND	ND	ND	ND	ND	ND	ND	ND	ND	ND	Q0P9S3	Cj0979c	7	5	ND	2.28538	0.846576	ND	1.56598	0.5139
Q0P9S2	Cj0980	Cj0980	Putative peptidase	29	29	29	29	0.966918	0.934283	1.02042	0.938243	0.964965	0.3288	Q0P9S2	Cj0980	28	28	28	1.30132	0.751914	0.822407	0.958548	0.822
Q0P9S0	Cj0982c	cjaA Cj0982c	Putative amino-acid transporter periplasmic solute-binding protein	48	48	47	47	0.447104	0.416175	0.475385	0.397873	0.434134	0.00013766	Q0P9S0	Cj0982c	44	44	44	0.333955	0.585951	0.543447	0.487784	0.0028
P45492	Cj0983	jlpA Cj0983	Uncharacterized lipoprotein Cj0983	31	31	30	30	0.532604	0.788224	0.51531	0.738757	0.643724	0.0274	P45492	Cj0983	35	34	34	0.787374	0.749374	0.795507	0.777418	7.4e-05
P45491	Cj0984	Cj0984	Uncharacterized protein Cj0984	19	19	18	18	0.872389	0.942539	0.854305	0.911696	0.895232	0.11492	P45491	Cj0984	13	12	13	0.585846	0.922111	0.934693	0.814216	0.1792
P45493	Cj0985c	hipO Cj0985c	Hippurate hydrolase (EC 3.5.1.32) (Benzoylglycine amidohydrolase) (Hippuricase)	25	25	22	22	1.12942	1.05863	1.19659	1.08081	1.11636	0.0641	P45493	Cj0985c	19	22	19	1.32208	0.771389	0.778337	0.957268	0.8263
Q0P9R3	Cj0989	Cj0989	Putative membrane protein	2	2	2	2	0.455362	0.537445	0.576035	0.579238	0.53702	0.011197	Q0P9R3	Cj0989	5	5	5	0.670894	0.675706	0.590832	0.645811	0.00024
P45489	Cj0990c	Cj0990c	Uncharacterized protein Cj0990c	5	5	5	5	0.839814	0.19477	0.564766	0.695514	0.573716	0.1091	P45489	Cj0990c	9	9	9	0.297117	0.71635	0.700033	0.571167	0.0353
Q0P9R1	Cj0991c	Cj0991c	Putative oxidoreductase ferredoxin-type electron transport protein (Glycolate oxidase iron-sulfur subunit (EC 1.1.99.14))	20	20	17	17	1.19617	1.24595	1.18582	1.20831	1.20906	0.0029912	Q0P9R1	Cj0991c	21	20	20	1.43047	1.3674	1.08108	1.29298	0.0527
Q0P9R0	Cj0992c	Cj0992c	Oxygen-independent coproporphyrinogen III oxidase	42	42	45	45	1.05638	1.0189	1.10071	1.00939	1.04634	0.10756	Q0P9R0	Cj0992c	29	26	27	0.953866	1.26167	0.912796	1.04278	0.7174
Q0P9Q9	Cj0993c	Cj0993c	UPF0763 protein Cj0993c	11	11	11	11	0.980504	1.28461	1.06141	1.22885	1.13884	0.262	Q0P9Q9	Cj0993c	9	5	8	0.940739	0.35895	1.11978	0.806491	0.4469
Q9PNU6	Cj0994c	argF Cj0994c	Ornithine carbamoyltransferase (OTCase) (EC 2.1.3.3)	26	26	22	22	1.22498	1.15428	1.17319	1.08087	1.15833	0.018396	Q9PNU6	Cj0994c	21	21	21	1.4107	0.954747	1.00679	1.12408	0.4378
Q0P9Q7	Cj0995c	hemB Cj0995c	Delta-aminolevulinic acid dehydratase (EC 4.2.1.24)	30	30	27	27	1.01551	1.02085	0.989905	1.00844	1.00867	0.1015	Q0P9Q7	Cj0995c	29	29	28	0.958789	1.16035	0.790864	0.970001	0.7927
Q0P9Q6	Cj0996	ribA Cj0996	GTP cyclohydrolase II (EC 3.5.4.25)	25	25	21	21	1.26323	1.16915	1.2349	1.19928	1.21664	0.0074298	Q0P9Q6	Cj0996	13	13	13	1.0846	1.25573	0.900207	1.08018	0.4784
Q9PNU3	Cj0997	rsmG Cj0997	Ribosomal RNA small subunit methyltransferase G (EC 2.1.1.170) (16S rRNA 7-methylguanosine methyltransferase) (16S rRNA m7G methyltransferase)	8	8	6	6	1.36005	1.05508	1.05655	1.30335	1.19376	0.1838	Q9PNU3	Cj0997	10	10	10	1.80654	1.21001	1.19481	1.40379	0.1155
Q0P9Q4	Cj0998c	Cj0998c	Putative periplasmic protein	24	24	20	20	0.546842	0.609707	0.714783	0.652722	0.631013	0.00231	Q0P9Q4	Cj0998c	29	32	31	0.810892	0.718891	1.11503	0.881603	0.3786
Q0P9Q2	Cj1000	Cj1000	Putative transcriptional regulator (LysR family)	12	11	13	13	1.0863	1.06281	0.920522	0.965539	1.00879	0.71023	Q0P9Q2	Cj1000	14	12	13	ND	0.877233	1.3879	1.13257	0.5362
Q0P9Q1	Cj1001	rpoD Cj1001	RNA polymerase sigma factor (RpoD Sigma-70)	54	54	59	59	1.21578	1.12644	1.20422	1.13833	1.17119	0.0073	Q0P9Q1	Cj1001	68	65	69	1.08161	0.882313	1.39884	1.12092	0.4665
Q0P9Q0	Cj1002c	Cj1002c	Putative phosphoglycerate/bisphosphoglycerate mutase (EC 3.1.3.-)	5	5	3	3	0.994966	0.933553	1.11492	0.828117	0.96789	0.75759	Q0P9Q0	Cj1002c	8	8	8	0.849899	0.990697	1.43329	1.0913	0.6309
Q0P9P8	Cj1004	Cj1004	Putative periplasmic protein	6	6	6	6	1.30236	1.47315	1.49316	1.36872	1.40935	0.0029827	Q0P9P8	Cj1004	ND	ND	ND	ND	ND	ND	ND	ND
Q0P9P7	Cj1005c	Cj1005c	Putative membrane bound ATPase (EC 3.4.24.-)	26	26	30	30	0.680509	0.723565	0.705264	0.743158	0.713124	0.0024961	Q0P9P7	Cj1005c	37	35	35	0.566566	0.64876	0.778255	0.664527	0.0055
Q0P9P6	Cj1006c	Cj1006c	Putative MiaB-like tRNA modifying enzyme	16	16	21	21	1.09999	1.17754	1.24894	1.15796	1.17111	0.0206	Q0P9P6	Cj1006c	21	21	25	0.953849	0.91195	0.584265	0.816688	0.1917
Q0P9P5	Cj1007c	Cj1007c	Putative mechanosensitive ion channel family protein	12	12	14	14	0.87746	0.967589	0.674776	0.801364	0.830297	0.10028	Q0P9P5	Cj1007c	26	24	27	1.03553	0.871306	0.849293	0.918711	0.2387
Q9PNT2	Cj1008c	aroB Cj1008c	3-dehydroquinate synthase (EC 4.2.3.4)	23	23	22	22	0.647535	0.793956	0.730543	0.790478	0.740628	0.0073	Q9PNT2	Cj1008c	18	22	23	1.33457	1.23594	1.22034	1.26361	0.0018
Q0P9P3	Cj1009c	Cj1009c	Conserved hypothetical proetin Cj1009c	15	15	13	13	0.841166	0.846326	0.887351	1.03496	0.902451	0.225	Q0P9P3	Cj1009c	15	15	15	1.17362	1.02711	1.37618	1.1923	0.1302
Q9PNT0	Cj1010	tgt Cj1010	Queuine tRNA-ribosyltransferase (EC 2.4.2.29) (Guanine insertion enzyme) (tRNA-guanine transglycosylase)	14	14	16	16	1.07545	1.0351	0.955112	1.03505	1.02518	0.27293	Q9PNT0	Cj1010	14	14	14	1.01753	1.19072	0.822079	1.01011	0.9289
Q0P9P1	Cj1011	Cj1011	Putative CorA-like Mg2+ transporter protein	2	2	5	5	1.88643	6.25323	1.29983	2.27299	2.92812	0.01854	Q0P9P1	Cj1011	5	5	5	4.23086	1.80442	3.11553	3.05027	0.0398
Q0P9N9	Cj1013c	Cj1013c	Putative cytochrome C biogenesis protein	33	33	28	28	0.724424	0.77684	0.658479	0.718891	0.719658	0.0090014	Q0P9N9	Cj1013c	44	41	45	0.134221	0.753515	0.949207	0.612314	0.1896
Q0P9N8	Cj1014c	livF Cj1014c	Branched-chain amino-acid ABC transport system ATP-binding protein	20	20	18	18	0.648588	0.751119	0.70714	0.760304	0.716787	0.008277	Q0P9N8	Cj1014c	20	21	24	1.11842	0.539567	0.95803	0.872004	0.4994
Q0P9N7	Cj1015c	livG Cj1015c	Branched-chain amino-acid ABC transport system ATP-binding protein	19	19	18	18	0.714752	0.70768	0.680998	0.690238	0.698417	0.0018587	Q0P9N7	Cj1015c	14	14	14	0.84085	0.729898	0.656175	0.742308	0.0086
Q0P9N6	Cj1016c	livM Cj1016c	Branched-chain amino-acid ABC transport system permease protein	ND	ND	ND	1	ND	ND	ND	1.34588	1.34588	ND	Q0P9N6	Cj1016c	ND	ND	1	ND	ND	1.39883	1.39883	ND
Q0P9N4	Cj1018c	livK Cj1018c	Branched-chain amino-acid ABC transport system,periplasmic binding protein	25	25	23	23	0.990553	0.959202	0.941627	0.927245	0.954657	0.40917	Q0P9N4	Cj1018c	25	25	25	0.877414	0.992228	0.98799	0.952544	0.2753
Q0P9N3	Cj1019c	livJ Cj1019c	Branched-chain amino-acid ABC transport system periplasmic binding protein	35	35	37	37	1.00307	0.978333	1.01045	0.962036	0.988473	0.99972	Q0P9N3	Cj1019c	31	31	31	0.645657	0.698581	0.773929	0.706056	0.0014
Q0P9N2	Cj1020c	Cj1020c	Putative cytochrome C	14	14	14	14	0.967778	1.23016	1.03119	1.12172	1.08771	0.25668	Q0P9N2	Cj1020c	14	14	13	0.795617	1.04235	0.665584	0.834517	0.2086
Q0P9N0	Cj1022c	Cj1022c	Putative integral membrane protein	1	1	1	1	1.0204	1.17947	0.757717	1.12951	1.02177	0.84426	Q0P9N0	Cj1022c	ND	ND	ND	ND	ND	ND	ND	ND
Q59291	Cj1023c	asd Cj1023c	Aspartate-semialdehyde dehydrogenase (ASA dehydrogenase) (ASADH) (EC 1.2.1.11) (Aspartate-beta-semialdehyde dehydrogenase)	30	30	32	32	1.26699	1.1687	1.25471	1.18784	1.21956	0.008277	Q59291	Cj1023c	31	31	31	1.1576	1.15205	0.875539	1.06173	0.5436
Q0P9M8	Cj1024c	flgR Cj1024c	Sigma-54 associated transcriptional activator	38	38	32	32	1.07961	1.09135	1.20983	1.15855	1.13484	0.0419	Q0P9M8	Cj1024c	34	32	31	0.977962	0.881827	0.94582	0.935203	0.0836
Q0P9M7	Cj1025c	flgQ Cj1025c	Putative uncharacterized protein	4	4	4	4	1.308	1.1921	1.18419	1.26919	1.23837	0.028907	Q0P9M7	Cj1025c	ND	ND	ND	ND	ND	ND	ND	ND
Q0P9M6	Cj1026c	flgP Cj1026c	Putative lipoprotein	14	14	18	18	0.887941	1.13137	1.80464	1.39035	1.30357	0.2192	Q0P9M6	Cj1026c	18	18	19	2.31034	1.58173	1.49385	1.79531	0.0372
Q03470	Cj1027c	gyrA Cj1027c	DNA gyrase subunit A (EC 5.99.1.3)	56	56	53	53	1.10306	1.07833	1.16717	1.09452	1.11077	0.191	Q03470	Cj1027c	56	59	60	1.12724	0.915706	0.972639	1.00519	0.9385
Q0P9M4	Cj1028c	Cj1028c	Putative purine/pyrimidine phosphoribosyltransferase	1	1	ND	ND	1.82159	1.51811	ND	ND	1.66985	ND	Q0P9M4	Cj1028c	ND	ND	ND	ND	ND	ND	ND	ND
P0C633	Cj1029c	mapA Cj1029c	Outer membrane lipoprotein MapA	10	10	13	13	0.514223	0.617078	0.575101	0.585959	0.57309	0.0058737	P0C633	Cj1029c	19	19	19	0.450028	0.752761	0.689271	0.630686	0.016
Q9PNR1	Cj1030c	lepA Cj1030c	Elongation factor 4 (EF-4) (EC 3.6.5.n1) (Ribosomal back-translocase LepA)	33	32	37	37	1.22755	1.14163	1.27115	1.18566	1.2065	0.016735	Q9PNR1	Cj1030c	33	37	32	1.09005	1.20238	1.38656	1.22633	0.0589
Q0P9M1	Cj1031	cmeD Cj1031	Outer membrane component of efflux system (Multidrug efflux system CmeDEF)	15	15	13	13	1.23157	1.79013	1.49272	1.17085	1.42132	0.0486	Q0P9M1	Cj1031	21	19	20	1.51422	1.37602	1.50975	1.46666	0.000512
Q0P9M0	Cj1032	cmeE Cj1032	Membrane fusion component of efflux system (Mutlidrug efflux system CmeDEF)	16	16	17	17	1.37264	1.32327	1.42372	1.52327	1.41072	0.0058194	Q0P9M0	Cj1032	21	17	16	1.29347	2.06777	1.69569	1.68564	0.0374
Q0P9L9	Cj1033	cmeF Cj1033	Integral membrane component of efflux system (Multidrug efflux system CmeDEF)	29	29	30	30	1.31723	1.84428	1.35562	1.20947	1.43165	0.0549	Q0P9L9	Cj1033	41	40	34	2.67726	1.32622	1.49695	1.83348	0.00781
Q0P9L8	Cj1034c	fedC Cj1034c	Putative DnaJ-like protein	2	2	ND	ND	1.00979	1.04424	ND	ND	1.02702	ND	Q0P9L8	Cj1034c	ND	2	4	ND	0.837436	1.00049	0.918961	0.2745
Q9PNQ6	Cj1035c	ate Cj1035c	Aspartate/glutamate leucyltransferase (EC 2.3.2.29)	12	12	10	10	1.33418	1.32542	1.53524	1.39102	1.39646	0.0032342	Q9PNQ6	Cj1035c	9	9	10	0.670048	1.0288	0.680847	0.793232	0.1541
Q0P9L6	Cj1036c	fliJ Cj1036c	Flagellar export protein FliJ	8	8	8	8	0.982819	0.865886	0.54565	0.590701	0.746264	0.1856	Q0P9L6	Cj1036c	ND	3	3	ND	0.58087	0.603251	0.592061	5.9e-05
Q0P9L5	Cj1037c	pycA Cj1037c	Pyruvate carboxylase A subunit (EC 6.4.1.1) Biotin carboxylase (EC 6.3.4.14) (Acetyl-coenzyme A carboxylase biotin carboxylase subunit A)	40	40	36	36	0.940494	0.897726	0.922337	0.876994	0.909388	0.0122	Q0P9L5	Cj1037c	48	40	50	0.808403	0.866225	0.782106	0.818911	0.0019
Q0P9L4	Cj1038	Cj1038	Putative cell division/peptidoglycan biosynthesis protein	ND	ND	1	1	ND	ND	0.859262	1.16654	1.0129	ND	Q0P9L4	Cj1038	ND	ND	ND	ND	ND	ND	ND	ND
Q9PNQ2	Cj1039	murG Cj1039	UDP-N-acetylglucosamine--N-acetylmuramyl-(pentapeptide) pyrophosphoryl-undecaprenol N-acetylglucosamine transferase (EC 2.4.1.227) (Undecaprenyl-PP-MurNAc-pentapeptide-UDPGlcNAc GlcNAc transferase)	13	13	7	7	1.10278	0.974437	1.15395	1.06186	1.07326	0.21349	Q9PNQ2	Cj1039	13	13	14	0.811983	1.32932	1.03303	1.05811	0.7179
Q0P9L1	Cj1041c	Cj1041c	Putative periplasmic ATP/GTP-binding protein	14	14	13	13	1.00851	1.02867	0.996362	1.1251	1.03966	0.19368	Q0P9L1	Cj1041c	16	13	14	0.76758	1.29129	1.65816	1.23901	0.4074
Q0P9L0	Cj1042c	Cj1042c	Putative transcriptional regulatory protein	5	5	5	5	1.03533	0.962939	1.24324	1.27576	1.12932	0.3249	Q0P9L0	Cj1042c	6	5	6	0.939852	0.938199	1.01586	0.964637	0.2396
Q0P9K9	Cj1043c	Cj1043c	Putative thiamine-phosphate pyrophosphorylase (EC 2.5.1.3)	12	12	11	11	0.933377	0.964387	0.896545	0.999721	0.948507	0.1936	Q0P9K9	Cj1043c	4	4	4	1.00886	0.878926	0.95	0.94593	0.2234
Q0P9K8	Cj1044c	thiH Cj1044c	Thiazole biosynthesis protein ThiH	23	23	23	23	1.42205	1.32542	1.39992	1.22055	1.34198	0.012147	Q0P9K8	Cj1044c	22	22	22	1.31076	1.4626	0.796792	1.19005	0.3989
Q9PNP6	Cj1045c	thiG Cj1045c	Thiazole synthase (EC 2.8.1.10)	28	28	28	28	1.0132	0.973107	1.01745	0.993012	0.999192	0.52647	Q9PNP6	Cj1045c	21	21	21	1.08875	1.12303	0.906022	1.03927	0.5912
Q0P9K6	Cj1046c	moeB Cj1046c	Putative molybdopterin biosynthesis protein	23	23	23	23	1.26208	1.35182	1.61784	1.90989	1.53541	0.021701	Q0P9K6	Cj1046c	17	18	18	1.52101	2.1078	1.53854	1.72245	0.02008
Q0P9K5	Cj1047c	thiS Cj1047c	Putative thiamine biosynthesis protein	9	9	8	8	0.822031	1.00983	0.888362	0.994163	0.928596	0.29494	Q0P9K5	Cj1047c	ND	ND	ND	ND	ND	ND	ND	ND
Q0P9K4	Cj1048c	dapE Cj1048c	Succinyl-diaminopimelate desuccinylase (SDAP desuccinylase) (EC 3.5.1.18) (N-succinyl-LL-2,6-diaminoheptanedioate amidohydrolase)	36	36	37	37	1.17592	1.02383	1.21059	1.00589	1.10406	0.19082	Q0P9K4	Cj1048c	28	29	29	1.10721	0.993905	0.943021	1.01471	0.7769
Q9JN05	Cj1050c	cobB Cj1050c	NAD-dependent protein deacylase (EC 3.5.1.-) (Regulatory protein SIR2 homolog)	19	19	19	19	1.11781	1.07877	1.24381	1.04552	1.12148	0.10756	Q9JN05	Cj1050c	13	12	13	1.21978	0.860298	0.998088	1.02606	0.8157
Q0P9K1	Cj1051c	cjeI Cj1051c	Restriction modification enzyme (Site-specific DNA-methyltransferase (adenine-specific) (EC 2.1.1.72))	43	43	37	37	0.876582	0.924419	0.918043	0.91989	0.909733	0.0057	Q0P9K1	Cj1051c	72	67	70	0.528593	1.00171	1.15891	0.896402	0.6135
Q0P9K0	Cj1052c	mutS Cj1052c	Putative mismatch repair protein (Endonuclease MutS2 (EC 3.1.-.-))	22	22	24	24	1.2162	1.64807	2.34274	1.73442	1.73536	0.0069349	Q0P9K0	Cj1052c	25	24	24	2.26066	1.51221	1.79631	1.8564	0.0398
Q9PNN7	Cj1054c	murC Cj1054c	UDP-N-acetylmuramate--L-alanine ligase (EC 6.3.2.8) (UDP-N-acetylmuramoyl-L-alanine synthetase)	34	34	33	33	1.36054	1.26825	1.30798	1.17579	1.27814	0.0059903	Q9PNN7	Cj1054c	33	33	33	1.43397	1.17952	1.24488	1.28613	0.0199
Q0P9J7	Cj1055c	Cj1055c	Putative sulfatase family protein	16	16	12	12	0.859728	0.870405	0.853066	0.778929	0.840532	0.013512	Q0P9J7	Cj1055c	20	17	19	0.927815	0.900609	1.01017	0.946199	0.1777
Q0P9J6	Cj1056c	Cj1056c	Putative carbon-nitrogen hydrolase family protein	9	9	7	7	0.73136	0.967163	0.682811	0.86578	0.811779	0.1243	Q0P9J6	Cj1056c	16	15	15	0.755582	0.888157	0.802838	0.815526	0.0089
Q0P9J5	Cj1057c	Cj1057c	Putative coiled-coil protein	ND	ND	3	3	ND	ND	0.681803	1.20405	0.942926	ND	Q0P9J5	Cj1057c	ND	ND	ND	ND	ND	ND	ND	ND
Q0P9J4	Cj1058c	guaB Cj1058c	Inosine-5'-monophosphate dehydrogenase (IMP dehydrogenase) (IMPD) (IMPDH) (EC 1.1.1.205)	49	49	47	47	1.03699	0.944259	1.02098	0.951881	0.988528	0.97778	Q0P9J4	Cj1058c	51	58	61	0.862346	0.872152	0.926361	0.886953	0.0047
Q9PNN2	Cj1059c	gatA Cj1059c	Glutamyl-tRNA(Gln) amidotransferase subunit A (Glu-ADT subunit A) (EC 6.3.5.-)	39	39	39	39	1.10374	1.07359	1.12526	1.08204	1.09616	0.0046746	Q9PNN2	Cj1059c	28	28	28	0.985374	0.974553	0.961908	0.973945	0.0588
P41257	Cj1061c	ileS Cj1061c	Isoleucine--tRNA ligase (EC 6.1.1.5) (Isoleucyl-tRNA synthetase) (IleRS)	69	69	64	64	0.717128	0.901065	0.849755	0.835919	0.825967	0.0406	P41257	Cj1061c	63	64	63	0.728325	0.723971	0.754445	0.73558	1.5e-05
Q0P9J0	Cj1062	Cj1062	Putative CinA-like protein	18	18	17	17	0.926168	1.05048	0.954061	1.11355	1.01107	0.56451	Q0P9J0	Cj1062	10	10	10	1.38248	0.889087	1.21795	1.16317	0.3235
Q0P9I9	Cj1063	Cj1063	Putative acetyltransferase	13	13	9	9	0.966486	1.0253	1.01442	0.946797	0.988251	0.97482	Q0P9I9	Cj1063	ND	6	6	ND	0.850984	0.853462	0.852223	0.00084
Q0P9I8	Cj1066	rdxA Cj1066	Nitroreductase	16	16	13	13	0.897994	1.10926	0.914686	1.10946	1.00785	0.78733	Q0P9I8	Cj1066	11	13	11	0.73684	0.793405	0.887565	0.805937	0.0116
Q9PNM6	Cj1068	Cj1068	Putative zinc metalloprotease Cj1068 (EC 3.4.24.-)	2	2	4	4	1.19622	1.08065	0.931613	1.00989	1.0546	0.35129	Q9PNM6	Cj1068	7	7	ND	1.1846	1.30611	ND	1.24536	0.0562
Q0P9I5	Cj1069	Cj1069	Putative uncharacterized protein (VirK family antimicrobial peptide resistance protein)	2	2	4	4	0.893578	0.964636	0.938021	0.950385	0.936655	0.14042	Q0P9I5	Cj1069	8	2	ND	1.16089	1.32038	ND	1.24064	0.2071
Q9ZAH3	Cj1070	rpsF rps6 Cj1070	30S ribosomal protein S6	10	10	8	8	0.921596	1.15008	0.954067	1.19216	1.05448	0.31723	Q9ZAH3	Cj1070	15	15	15	2.20453	0.667239	1.01752	1.29643	0.5586
O69302	Cj1071	ssb Cj1071	Single-stranded DNA-binding protein (SSB) (Helix-destabilizing protein)	18	18	17	17	1.54941	1.19778	1.42321	1.16989	1.33507	0.0641	O69302	Cj1071	18	17	17	1.62039	0.944973	0.787077	1.11748	0.6696
O69301	Cj1072	rpsR rps18 Cj1072	30S ribosomal protein S18	16	16	13	13	0.934647	0.980499	0.76782	0.997276	0.920061	0.39603	O69301	Cj1072	16	16	17	1.06703	0.580024	0.695519	0.780858	0.2101
O69300	Cj1073c	lon Cj1073c	Lon protease (EC 3.4.21.53) (ATP-dependent protease La)	66	66	59	59	1.05928	0.980371	1.01164	0.933124	0.996104	0.8641	O69300	Cj1073c	71	70	73	1.04252	0.817243	0.862423	0.907397	0.2496
Q0P9I0	Cj1074c	Cj1074c	Putative lipoprotein (Outer membrane protein assembly factor BamD)	6	6	4	4	1.17534	1.94755	1.96365	1.57092	1.66436	0.034699	Q0P9I0	Cj1074c	6	5	6	2.37316	1.50885	1.63338	1.83846	0.0359
Q0P9H9	Cj1075	fliW Cj1075	Flagellar assembly factor FliW	5	5	5	5	1.16133	1.11029	3.22255	3.93251	2.35667	0.11317	Q0P9H9	Cj1075	3	4	3	4.01015	5.08858	2.06522	3.72132	0.01904
Q0P9H8	Cj1076	proC Cj1076	Pyrroline-5-carboxylate reductase (EC 1.5.1.2)	9	9	9	9	1.03916	0.99391	0.905151	0.978488	0.979178	0.70818	Q0P9H8	Cj1076	13	9	10	0.878228	0.985844	1.17952	1.01453	0.8771
Q0P9H4	Cj1080c	hemD Cj1080c	Putative uroporphyrinogen-III synthase (EC 4.2.1.75)	ND	ND	4	4	ND	ND	0.9955	0.906125	0.950813	ND	Q0P9H4	Cj1080c	ND	4	3	ND	0.480954	1.99784	1.2394	0.7005
Q9PNL3	Cj1081c	thiE Cj1081c	Thiamine-phosphate synthase (TP synthase) (TPS) (EC 2.5.1.3) (Thiamine-phosphate pyrophosphorylase) (TMP pyrophosphorylase) (TMP-PPase)	12	12	11	11	1.15448	1.07932	1.18895	1.06785	1.12265	0.0492	Q9PNL3	Cj1081c	5	5	5	0.601949	0.522044	1.37851	0.834167	0.5765
Q0P9H2	Cj1082c	thiD Cj1082c	Phosphomethylpyrimidine kinase (EC 2.7.4.7)	15	15	18	18	1.12669	1.02434	1.13012	0.954941	1.05903	0.25929	Q0P9H2	Cj1082c	15	15	15	0.936159	1.18521	0.917826	1.01307	0.8869
Q0P9H1	Cj1083c	Cj1083c	Putative nuclease (EC 4.2.99.18)	10	10	8	8	0.848043	1.14222	1.08862	1.16541	1.06107	0.40337	Q0P9H1	Cj1083c	ND	3	4	ND	1.27097	1.70423	1.4876	0.0568
Q0P9H0	Cj1084c	Cj1084c	Putative ATP/GTP-binding protein	10	10	8	8	0.982215	0.985553	1.09888	1.08489	1.03788	0.30879	Q0P9H0	Cj1084c	12	12	12	1.1477	0.966988	0.7278	0.947497	0.6882
Q0P9G9	Cj1085c	mfd Cj1085c	Transcription-repair coupling factor	41	41	42	42	1.13784	1.07037	1.09448	1.08911	1.09795	0.0102	Q0P9G9	Cj1085c	45	42	41	1.07308	1.23275	1.23964	1.18182	0.0288
Q0P9G8	Cj1086c	Cj1086c	Putative uncharacterized protein (Polymer-forming cytoskeletal family protein)	6	6	6	6	1.00241	0.909648	0.850427	0.863694	0.906544	0.13207	Q0P9G8	Cj1086c	8	6	8	1.79394	0.871306	0.667455	1.1109	0.765
Q0P9G7	Cj1087c	Cj1087c	Putative peptidase	11	11	11	11	1.7964	1.27231	1.01745	1.15782	1.31099	0.1646	Q0P9G7	Cj1087c	19	19	19	1.88681	1.46036	1.49705	1.61474	0.0108
Q0P9G6	Cj1088c	folC Cj1088c	Folylpolyglutamate synthase/dihydrofolate synthase (EC 6.3.2.12)	1	1	2	2	1.12378	1.05391	1.70733	1.49163	1.34416	0.1133	Q0P9G6	Cj1088c	5	3	5	1.43635	1.66302	1.61188	1.57042	0.00112
Q0P9G5	Cj1089c	Cj1089c	Diguanylate cyclase (DGC)	24	24	20	20	1.1195	1.22727	1.05935	1.10292	1.12726	0.0761	Q0P9G5	Cj1089c	23	24	23	1.51956	1.07622	1.12056	1.23878	0.1656
Q0P9G4	Cj1090c	Cj1090c	Putative lipoprotein	5	5	7	7	0.834626	0.838443	1.07706	0.971672	0.930449	0.40904	Q0P9G4	Cj1090c	7	7	5	1.00849	0.890781	1.11009	1.00312	0.9631
Q9PNK3	Cj1091	leuS Cj1091	Leucine--tRNA ligase (EC 6.1.1.4) (Leucyl-tRNA synthetase) (LeuRS)	67	67	65	65	1.14118	1.08529	1.16658	1.1468	1.13496	0.0069349	Q9PNK3	Cj1091	44	51	44	1.10267	1.10817	0.922957	1.0446	0.5042
Q0P9G2	Cj1092c	secF Cj1092c	Protein-export membrane protein SecF	6	6	6	6	0.715546	0.760402	0.84035	0.867956	0.796064	0.0181	Q0P9G2	Cj1092c	12	9	11	1.16699	0.860298	1.04268	1.02332	0.8063
Q0P9G1	Cj1093c	secD Cj1093c	Protein translocase subunit SecD	23	23	22	22	0.944559	0.890646	0.943799	0.975176	0.938545	0.08	Q0P9G1	Cj1093c	37	34	36	1.2223	1.20069	1.12083	1.18127	0.0422
Q0P9G0	Cj1094c	Cj1094c	Putative preprotein translocase protein (Sec translocon accessory complex subunit YajC)	9	9	7	7	0.835151	0.87541	0.71717	0.739651	0.791845	0.03299	Q0P9G0	Cj1094c	7	9	11	0.977684	0.703649	0.723248	0.801527	0.0878
Q9PNJ9	Cj1095	lnt Cj1095	Apolipoprotein N-acyltransferase (ALP N-acyltransferase) (EC 2.3.1.-)	8	7	6	5	2.12633	2.07981	1.85496	1.12943	1.79763	0.010998	Q9PNJ9	Cj1095	9	8	8	2.14459	1.92752	1.61311	1.89508	0.0206
Q0P9F8	Cj1096c	metK Cj1096c	S-adenosylmethionine synthetase (EC 2.5.1.6)	47	47	42	42	1.00527	1.01079	1.08936	1.03698	1.0356	0.24513	Q0P9F8	Cj1096c	46	47	46	1.21281	1.05501	0.990697	1.08617	0.2616
Q0P9F7	Cj1097	sstT Cj1097	Serine/threonine transporter SstT	ND	ND	ND	1	ND	ND	ND	1.13703	1.13703	ND	Q0P9F7	Cj1097	1	ND	ND	0.847665	ND	ND	0.847665	ND
Q9PNJ6	Cj1098	pyrB Cj1098	Aspartate carbamoyltransferase (EC 2.1.3.2) (Aspartate transcarbamylase) (ATCase)	18	18	14	14	0.979873	1.00221	1.05436	1.03413	1.01764	0.12836	Q9PNJ6	Cj1098	23	20	21	1.51441	1.04235	1.16539	1.24072	0.1639
Q0P9F5	Cj1099	Cj1099	Peptidase	30	30	29	29	1.04487	1.14905	1.05039	1.10672	1.08776	0.0774	Q0P9F5	Cj1099	30	30	30	1.0739	1.0559	1.39977	1.17652	0.1893
Q0P9F4	Cj1100	Cj1100	Hypothteical protein Cj1100	4	4	6	6	1.32767	1.00851	1.19367	1.11936	1.1623	0.06759	Q0P9F4	Cj1100	ND	3	4	ND	0.886547	0.883157	0.884852	0.02
Q0P9F3	Cj1101	Cj1101	ATP-dependent DNA helicase (EC 3.6.1.-)	10	9	8	8	0.86432	0.840457	0.686159	0.784092	0.793757	0.0256	Q0P9F3	Cj1101	22	22	21	0.696784	1.2625	1.97896	1.31275	0.4467
Q9PNJ2	Cj1102	truB Cj1102	tRNA pseudouridine synthase B (EC 5.4.99.25) (tRNA pseudouridine(55) synthase) (Psi55 synthase) (tRNA pseudouridylate synthase) (tRNA-uridine isomerase)	2	2	2	2	0.905181	0.926125	0.942947	0.884144	0.914599	0.038169	Q9PNJ2	Cj1102	5	2	ND	1.01525	1.17862	ND	1.09693	0.2096
Q0P9F1	Cj1103	csrA Cj1103	Carbon storage regulator homolog	12	12	11	11	1.35892	1.05185	1.07625	1.4138	1.22521	0.1849	Q0P9F1	Cj1103	8	8	8	3.38071	1.35141	1.90586	2.21266	0.0218
Q9PNJ0	Cj1104	ispE Cj1104	4-diphosphocytidyl-2-C-methyl-D-erythritol kinase (CMK) (EC 2.7.1.148) (4-(cytidine-5'-diphospho)-2-C-methyl-D-erythritol kinase)	21	21	16	16	1.09199	1.04473	1.01347	1.10001	1.06255	0.16271	Q9PNJ0	Cj1104	8	9	6	1.16163	0.763768	0.874839	0.933413	0.6043
Q9PNI9	Cj1105	smpB Cj1105	SsrA-binding protein	3	3	5	5	0.764581	0.912647	0.544871	0.730687	0.738197	0.0821	Q9PNI9	Cj1105	ND	3	ND	ND	0.861991	ND	0.861991	ND
Q0P9E8	Cj1106	Cj1106	Putative periplasmic thioredoxin	12	12	11	11	0.867678	0.926681	0.881384	0.859073	0.883704	0.0044682	Q0P9E8	Cj1106	8	8	8	0.948945	1.13719	0.832156	0.972762	0.7745
Q9PNI7	Cj1107	clpS Cj1107	ATP-dependent Clp protease adapter protein ClpS	4	4	3	3	1.14374	1.17085	1.18579	1.37843	1.2197	0.0524	Q9PNI7	Cj1107	4	3	ND	1.18122	0.805178	ND	0.993197	0.9643
Q0P9E6	Cj1108	clpA Cj1108	ATP-dependent Clp protease ATP-binding subunit	50	50	51	51	1.07684	0.97065	1.07348	1.01277	1.03343	0.15387	Q0P9E6	Cj1108	54	51	51	1.04369	1.1753	1.11686	1.11195	0.0424
Q9PNI5	Cj1109	aat Cj1109	Leucyl/phenylalanyl-tRNA--protein transferase (EC 2.3.2.6) (L/F-transferase) (Leucyltransferase) (Phenyalanyltransferase)	4	4	3	3	1.40899	1.19568	1.30244	1.2633	1.2926	0.0121	Q9PNI5	Cj1109	ND	3	3	ND	1.82475	1.27707	1.55091	0.0738
Q0P9E4	Cj1110c	tlp8 cetZ Cj1110c	Putative MCP-type signal transduction protein	39	38	36	35	0.30687	0.70722	0.728113	0.484259	0.556616	0.0416	Q0P9E4	Cj1110c	55	50	53	0.588705	0.668086	0.532096	0.596296	0.000512
Q0P9E3	Cj1111c	Cj1111c	UPF0056 inner membrane protein	ND	ND	ND	ND	ND	ND	ND	ND	ND	ND	Q0P9E3	Cj1111c	ND	1	ND	ND	1.1194	ND	1.1194	ND
Q0P9E2	Cj1112c	msrB Cj1112c	Peptide-methionine (R)-S-oxide reductase (EC 1.8.4.12) MsrB	17	17	16	16	1.04809	1.13397	1.13436	1.09494	1.10284	0.12642	Q0P9E2	Cj1112c	14	14	14	0.901349	0.886547	0.887016	0.891638	0.00105
Q0P9E1	Cj1113	Cj1113	Uncharacterized protein (Ferritin-like domain-containing protein)	ND	ND	ND	ND	ND	ND	ND	ND	ND	ND	Q0P9E1	Cj1113	ND	ND	3	ND	ND	1.44879	1.44879	ND
Q0P9D9	Cj1115c	Cj1115c	Putative phosphatidylserine decarboxylase-related protein (EC 4.1.1.65)	7	7	8	8	0.754468	0.934156	0.888457	0.953641	0.882681	0.1563	Q0P9D9	Cj1115c	12	14	14	1.05732	0.756148	0.994761	0.936077	0.5244
Q0P9D8	Cj1116c	ftsH Cj1116c	ATP-dependent zinc metalloprotease FtsH (EC 3.4.24.-)	45	45	43	42	0.808476	0.846169	0.80588	0.795201	0.813932	0.00585	Q0P9D8	Cj1116c	61	56	60	0.794868	0.878926	0.799257	0.824351	0.003
Q9PNH7	Cj1117c	prmA Cj1117c	Ribosomal protein L11 methyltransferase (L11 Mtase) (EC 2.1.1.-)	6	6	4	4	1.13897	0.980649	1.16707	0.977175	1.06597	0.43475	Q9PNH7	Cj1117c	4	3	4	1.29611	1.59104	0.438948	1.1087	0.7688
P0C635	Cj1118c	cheY Cj1118c	Chemotaxis protein CheY homolog	21	21	19	19	1.07715	1.00801	1.12827	0.947482	1.04023	0.36065	P0C635	Cj1118c	20	21	19	0.856627	1.345	0.637603	0.94641	0.8104
Q0P9D5	Cj1119c	pglG Cj1119c	Putative integral membrane protein	3	3	5	5	0.798492	0.734188	0.961695	0.928857	0.855808	0.148	Q0P9D5	Cj1119c	ND	3	5	ND	1.13295	0.421922	0.777437	0.4626
Q0P9D4	Cj1120c	pglF Cj1120c	UDP-N-acetyl-alpha-D-glucosamine C6 dehydratase (UDP-GlcNAc C6 dehydratase) (EC 4.2.1.135) (Protein glycosylation pathway protein F) (UDP-N-acetylglucosamine 4,6-dehydratase (configuration-retaining))	26	26	23	23	1.06067	1.38364	1.21902	1.2337	1.22426	0.0862	Q0P9D4	Cj1120c	35	29	34	1.39695	1.1084	1.28048	1.26194	0.0353
Q0P9D3	Cj1121c	pglE Cj1121c	UDP-4-amino-4,6-dideoxy-N-acetyl-alpha-D-glucosamine transaminase (EC 2.6.1.91) (Protein glycosylation pathway protein E) (UDP-4-keto-6-deoxy-GlcNAc C4 aminotransferase)	31	31	31	31	1.05233	1.09022	0.976013	1.1419	1.06512	0.62205	Q0P9D3	Cj1121c	27	27	27	1.1564	1.26879	1.19457	1.20659	0.0033
Q0P9D1	Cj1123c	pglD Cj1123c	UDP-N-acetylbacillosamine N-acetyltransferase (EC 2.3.1.203) (Protein glycosylation D) (UDP-4-amino-4,6-dideoxy-N-acetyl-alpha-D-glucosamine N-acetyltransferase)	13	13	10	10	1.33399	1.25593	3.01774	2.02305	1.90768	0.087935	Q0P9D1	Cj1123c	4	4	4	5.13836	2.31349	1.64509	3.03232	0.0281
Q0P9D0	Cj1124c	pglC Cj1124c	Undecaprenyl phosphate N,N'-diacetylbacillosamine 1-phosphate transferase (EC 2.7.8.36) (Protein glycosylation C)	3	3	6	6	0.932091	1.53298	4.74685	0.907091	2.02975	0.1042	Q0P9D0	Cj1124c	7	7	7	0.893605	3.95615	1.33726	2.06234	0.4525
Q0P9C9	Cj1125c	pglA Cj1125c	N,N'-diacetylbacillosaminyl-diphospho-undecaprenol alpha-1,3-N-acetylgalactosaminyltransferase (EC 2.4.1.290) (Protein glycosylation A)	12	12	9	9	1.18269	1.2365	1.57352	1.10463	1.27434	0.0767	Q0P9C9	Cj1125c	11	10	11	1.71644	2.50003	1.62565	1.94737	0.027
Q0P9C8	Cj1126c	pglB Cj1126c	Undecaprenyl-diphosphooligosaccharide--protein glycotransferase (EC 2.4.99.19) (Protein glycosylation B)	6	6	9	9	2.18656	0.846303	1.27029	1.01657	1.32993	0.3498	Q0P9C8	Cj1126c	8	9	9	1.3193	1.9623	1.35261	1.54474	0.0396
Q0P9C7	Cj1127c	pglJ Cj1127c	N-acetylgalactosamine-N,N'-diacetylbacillosaminyl-diphospho-undecaprenol 4-alpha-N-acetylgalactosaminyltransferase (EC 2.4.1.291) (Protein glycosylation J)	12	12	10	10	1.02668	1.70192	1.75752	1.10607	1.39805	0.1305	Q0P9C7	Cj1127c	12	12	13	1.4078	1.80242	1.87316	1.69446	0.0087
Q0P9C6	Cj1128c	pglI Cj1128c	GalNAc(5)-diNAcBac-PP-undecaprenol beta-1,3-glucosyltransferase (EC 2.4.1.293) (Protein glycosylation I)	10	10	12	12	1.27536	1.24105	1.30967	1.41281	1.30972	0.0051	Q0P9C6	Cj1128c	24	24	24	1.28549	2.27458	1.30357	1.62122	0.0415
Q0P9C5	Cj1129c	pglH Cj1129c	GalNAc-alpha-(1->4)-GalNAc-alpha-(1->3)-diNAcBac-PP-undecaprenol alpha-1,4-N-acetyl-D-galactosaminyltransferase (EC 2.4.1.292) (Protein glycosylation H)	9	9	11	11	2.45789	1.29375	1.5518	1.79415	1.7744	0.0532	Q0P9C5	Cj1129c	21	16	20	2.53645	2.32418	1.70619	2.18894	0.0343
Q0P9C4	Cj1130c	pglK wlaB Cj1130c	Protein glycosylation K (EC 3.6.3.39)	16	16	15	15	1.06896	2.34403	1.16342	1.50297	1.51984	0.1711	Q0P9C4	Cj1130c	24	24	24	3.84369	1.52003	1.28121	2.21498	0.0282
Q0P9C3	Cj1131c	gne Cj1131c	UDP-GlcNAc/Glc 4-epimerase (EC 5.1.3.2) (UDP-glucose 4-epimerase (EC 5.1.3.2))	41	41	37	37	1.05575	1.02385	1.13079	1.03916	1.06239	0.14727	Q0P9C3	Cj1131c	35	37	36	0.867427	1.03357	1.24787	1.04962	0.6756
Q0P9C2	Cj1132c	Cj1132c	Putative uncharacterized protein (DNA_pol_B_exo2 domain-containing protein)	18	18	15	15	0.928157	0.953158	0.926017	0.953605	0.940234	0.0090753	Q0P9C2	Cj1132c	15	13	13	1.17018	0.815426	0.834049	0.939885	0.6296
Q0P9C1	Cj1133	waaC Cj1133	Heptosyltransferase I	6	6	10	10	1.50826	1.22921	1.19557	1.5664	1.37486	0.0289	Q0P9C1	Cj1133	15	15	15	2.2655	1.38274	1.75359	1.80061	0.0352
Q0P9C0	Cj1134	htrB Cj1134	Putative lipid A biosynthesis lauroyl acyltransferase (EC 2.3.1.-)	4	4	6	6	0.930072	0.934548	0.887949	1.00511	0.939419	0.47441	Q0P9C0	Cj1134	7	7	7	0.718461	0.669779	1.04851	0.812251	0.1897
Q0P9B9	Cj1135	Cj1135	Putative two-domain glucosyltransferase	6	6	6	6	1.20324	1.41836	1.22598	1.4001	1.31192	0.017625	Q0P9B9	Cj1135	15	19	16	1.71338	1.37597	1.32085	1.47007	0.0186
Q0P9B8	Cj1136	Cj1136	Putative glycosyltransferase	16	13	10	8	1.10101	1.01388	1.1258	0.976637	1.05433	0.13	Q0P9B8	Cj1136	14	10	11	0.868593	0.900942	1.35431	1.04128	0.8053
Q0P9B7	Cj1137c	Cj1137c	Putative glycosyltransferase	4	4	3	3	0.9544	0.994355	1.08968	1.02506	1.01587	0.60844	Q0P9B7	Cj1137c	ND	3	4	ND	1.0161	1.27001	1.14306	0.2278
Q0P9B6	Cj1138	Cj1138	Putative glycosyltransferase	6	1	4	2	1.03228	0.956606	0.864105	0.978968	0.95799	0.50143	Q0P9B6	Cj1138	ND	2	3	ND	0.930578	0.792008	0.861293	0.0747
Q0P9B4	Cj1140	cstIII Cj1140	Alpha-2,3 sialyltransferase	9	9	5	5	0.779742	0.749547	0.690798	0.828106	0.762048	0.0053	Q0P9B4	Cj1140	9	11	11	0.98206	1.01356	0.982918	0.992846	0.5278
Q0P9B3	Cj1141	neuB1 Cj1141	Sialic acid synthase (N-acetylneuraminic acid synthetase) (EC 4.1.3.-)	33	33	27	27	1.15467	1.05557	1.18379	0.981749	1.09394	0.2483	Q0P9B3	Cj1141	23	26	25	1.01739	1.51532	1.06061	1.19777	0.2822
Q0P9B2	Cj1142	neuC1 Cj1142	Putative UDP-N-acetylglucosamine 2-epimerase (EC 5.1.3.-)	13	13	9	9	0.950048	1.31454	1.17974	1.48229	1.23165	0.2415	Q0P9B2	Cj1142	13	13	16	1.49967	1.63599	1.48836	1.54134	0.0003
Q0P9B1	Cj1143	neuA1 cgtA Cj1143	Two-domain bifunctional protein (Beta-1,4-N-acetylgalactosaminyltransferase/CMP-Neu5Ac synthase) (EC 2.7.7.43)	16	16	12	12	0.794006	0.799333	0.799218	0.82741	0.804992	0.0022425	Q0P9B1	Cj1143	16	17	22	1.06649	0.863685	1.27676	1.06898	0.594
Q0P9A9	Cj1146c	waaV Cj1146c	Putative glucosyltransferase	7	7	6	6	1.18916	1.24087	1.15291	1.77392	1.33921	0.1028	Q0P9A9	Cj1146c	4	4	4	1.35862	1.82983	2.4298	1.87275	0.048
Q0P9A8	Cj1148	waaF Cj1148	Heptosyltransferase II	6	6	6	6	1.03345	1.18751	1.11024	1.18729	1.12962	0.18485	Q0P9A8	Cj1148	11	10	11	3.23739	0.959368	1.45784	1.88487	0.2698
Q9PNE6	Cj1149c	gmhA1 gmhA Cj1149c	Phosphoheptose isomerase 1 (EC 5.3.1.28) (Sedoheptulose 7-phosphate isomerase 1)	15	15	17	17	0.929072	1.18582	0.889893	1.09094	1.02393	0.64263	Q9PNE6	Cj1149c	13	13	15	1.3028	0.623208	0.744983	0.89033	0.6278
Q6TG09	Cj1150c	hldE waaE Cj1150c	Bifunctional protein HldE [Includes: D-beta-D-heptose 7-phosphate kinase (EC 2.7.1.-) (D-beta-D-heptose 7-phosphotransferase); D-beta-D-heptose 1-phosphate adenosyltransferase (EC 2.7.7.-)]	36	35	34	33	1.07642	0.87406	0.798492	0.82567	0.893661	0.3227	Q6TG09	Cj1150c	34	34	33	0.916378	0.901745	0.963897	0.92734	0.0179
Q0P9A5	Cj1151c	hldD Cj1151c	ADP-glyceromanno-heptose 6-epimerase (EC 5.1.3.20)	23	23	25	25	0.988392	0.970418	1.02512	1.07189	1.01395	0.25422	Q0P9A5	Cj1151c	24	24	23	0.996227	1.06126	0.724818	0.927434	0.5201
Q6TG07	Cj1152c	gmhB Cj1152c	D,D-heptose 1,7-bisphosphate phosphatase (EC 3.1.3.-) (D-glycero-D-manno-heptose 1,7-bisphosphate phosphatase) (HBP phosphatase)	14	14	12	12	1.30121	1.49389	1.30348	2.75952	1.71453	ND	Q6TG07	Cj1152c	5	5	5	2.05678	2.75322	2.05482	2.28827	0.0232
Q0P9A3	Cj1153	Cj1153	Putative periplasmic cytochrome C	14	14	15	15	0.840153	0.295468	0.612448	0.750016	0.624521	0.1038	Q0P9A3	Cj1153	14	14	14	0.636747	0.314412	0.836798	0.595986	0.0567
Q0P9A1	Cj1155c	Cj1155c	Putative cation-transporting ATPase	3	3	2	2	0.608871	0.780064	0.679525	0.555268	0.655932	0.0092	Q0P9A1	Cj1155c	9	7	6	0.986948	1.25319	1.93683	1.39232	0.2378
Q0P9A0	Cj1156	rho Cj1156	Transcription termination factor Rho (EC 3.6.4.-) (ATP-dependent helicase Rho)	48	48	50	50	1.36211	1.11356	1.34625	1.18403	1.25149	0.0517	Q0P9A0	Cj1156	41	40	44	1.49504	1.2805	1.19937	1.32497	0.0211
Q0P999	Cj1157	dnaX Cj1157	Putative DNA polymerase III subunit gamma (EC 2.7.7.7)	20	20	20	20	1.02744	0.982206	0.944417	1.01413	0.992049	0.93459	Q0P999	Cj1157	24	24	24	0.788356	1.49523	1.18122	1.15493	0.4908
Q0P995	Cj1161c	copA Cj1161c	Putative cation-transporting ATPase	7	7	9	9	0.678162	0.709868	0.601977	0.705381	0.673847	0.0010657	Q0P995	Cj1161c	10	9	13	1.20529	1.17529	1.02201	1.1342	0.0773
Q0P994	Cj1162c	Cj1162c	Putative heavy-metal-associated domain protein	6	6	6	6	0.868965	0.929914	0.720735	0.892124	0.852934	0.0991	Q0P994	Cj1162c	4	4	4	0.785558	0.925498	1.14318	0.951412	0.6648
Q0P993	Cj1163c	Cj1163c	Putative cation transport protein	1	1	2	2	1.01328	0.895423	1.11042	1.02814	1.01181	ND	Q0P993	Cj1163c	ND	2	2	ND	1.39629	1.24203	1.31916	0.1151
Q0P992	Cj1164c	Cj1164c	Putative uncharacterized protein (zf-TFIIB domain-containing protein)	12	12	12	12	0.598373	0.729521	0.591701	0.543721	0.615829	0.0031	Q0P992	Cj1164c	7	7	7	0.715005	0.726511	0.604684	0.682067	0.0012
Q0P990	Cj1166c	Cj1166c	Putative integral membrane protein	ND	ND	1	1	ND	ND	0.991381	1.52724	1.25931	ND	Q0P990	Cj1166c	2	2	ND	1.30145	2.24477	ND	1.77311	0.1153
Q0P989	Cj1167	Cj1167	L-lactate dehydrogenase (EC 1.1.1.27)	25	25	24	24	1.2794	1.14345	1.26686	1.07022	1.18998	0.0646	Q0P989	Cj1167	19	19	19	1.34063	1.23748	0.922754	1.16695	0.2548
Q0P988	Cj1168c	Cj1168c	Putative integral membrane protein (DedA homolog)	1	1	1	1	1.05762	0.89397	0.920647	0.899652	0.942973	0.41159	Q0P988	Cj1168c	ND	ND	ND	ND	ND	ND	ND	ND
Q0P987	Cj1169c	Cj1169c	Putative periplasmic protein	5	5	3	3	0.835249	0.749762	0.650626	0.56181	0.699362	0.0279	Q0P987	Cj1169c	5	5	5	5.2527	2.13894	2.0195	3.13705	0.00016
Q0P986	Cj1170c	cjtK omp50 Cj1170c	50 kDa outer membrane protein	8	8	12	12	2.18889	1.42589	2.09919	1.25613	1.74252	0.05	Q0P986	Cj1170c	36	36	36	1.26149	2.16937	1.58531	1.67205	0.0351
Q0P985	Cj1171c	ppi Cj1171c	Peptidyl-prolyl cis-trans isomerase (EC 5.2.1.8)	10	10	11	11	1.29497	1.24208	1.35243	1.25043	1.28497	0.0016043	Q0P985	Cj1171c	10	11	10	1.08736	1.98267	2.36017	1.81007	0.0684
Q9PNC3	Cj1172c	Cj1172c	Probable transcriptional regulatory protein Cj1172c	23	23	21	21	1.22027	1.09946	1.27301	1.16209	1.18871	0.0282	Q9PNC3	Cj1172c	20	20	21	1.02374	0.778227	0.792558	0.864842	0.1646
Q9PNC0	Cj1175c	argS Cj1175c	Arginine--tRNA ligase (EC 6.1.1.19) (Arginyl-tRNA synthetase) (ArgRS)	40	40	39	39	1.51541	1.51823	1.42781	1.38949	1.46273	0.0032342	Q9PNC0	Cj1175c	35	35	35	1.24898	1.8583	1.80561	1.63763	0.0308
Q9PNB9	Cj1176c	tatA Cj1176c	Sec-independent protein translocase protein TatA	5	5	7	7	0.946448	1.02674	0.982284	1.00073	0.98905	0.99178	Q9PNB9	Cj1176c	ND	5	7	ND	0.696028	0.701162	0.698595	0.0051
Q9PNB8	Cj1177	gmk Cj1177	Guanylate kinase (EC 2.7.4.8) (GMP kinase)	16	16	12	12	1.66127	1.50745	1.79827	1.4678	1.6087	0.0032191	Q9PNB8	Cj1177	12	12	14	1.90325	1.43038	1.25243	1.52868	0.0529
Q0P978	Cj1178c	Cj1178c	Highly acidic protein	7	7	8	8	0.852772	1.15419	0.974559	1.03487	1.0041	0.84838	Q0P978	Cj1178c	ND	3	4	ND	1.13464	0.500592	0.817618	0.4964
Q0P976	Cj1180c	Cj1180c	Putative ABC transporter ATP-binding protein	6	6	6	6	0.726663	0.751242	0.769698	0.891843	0.784862	0.0175	Q0P976	Cj1180c	7	7	7	0.975922	1.01173	1.0841	1.02392	0.494
Q9PNB4	Cj1181c	tsf Cj1181c	Elongation factor Ts (EF-Ts)	51	50	48	47	1.34299	1.24095	1.31206	1.23331	1.28233	0.0024753	Q9PNB4	Cj1181c	47	50	46	0.926079	0.683327	0.693216	0.767541	0.0428
Q9PNB3	Cj1182c	rpsB Cj1182c	30S ribosomal protein S2	33	33	33	33	1.05036	1.0316	1.08631	1.04781	1.05402	0.036513	Q9PNB3	Cj1182c	49	49	49	1.1016	0.690948	0.668316	0.820288	0.2709
Q0P973	Cj1183c	cfa Cj1183c	Cyclopropane-fatty-acyl-phospholipid synthase (EC 2.1.1.79)	15	15	14	14	0.683166	0.698801	0.473025	0.689755	0.636187	0.029941	Q0P973	Cj1183c	17	15	14	0.766265	0.644773	0.592392	0.66781	0.003
Q0P972	Cj1184c	petC Cj1184c	Putative ubiquinol-cytochrome C reductase cytochrome C subunit	36	36	34	34	0.971176	0.978596	0.949422	1.06014	0.989833	0.99672	Q0P972	Cj1184c	41	40	35	1.00817	0.872257	1.06436	0.981596	0.7631
Q0P971	Cj1185c	petB Cj1185c	Cytochrome b	5	5	3	3	2.21537	1.79515	1.18114	1.11476	1.5766	0.09906	Q0P971	Cj1185c	5	5	5	2.16786	3.99168	1.55921	2.57292	0.0405
Q0P970	Cj1186c	petA Cj1186c	Ubiquinol-cytochrome c reductase iron-sulfur subunit (EC 1.10.2.2)	14	14	9	9	0.879472	0.826302	0.618635	0.527568	0.712994	0.0839	Q0P970	Cj1186c	20	20	20	0.98103	0.712963	0.410787	0.701593	0.1443
Q9PNA7	Cj1188c	mnmG gidA Cj1188c	tRNA uridine 5-carboxymethylaminomethyl modification enzyme MnmG (Glucose-inhibited division protein A)	37	37	38	38	1.19047	1.26089	1.17952	1.2073	1.20955	0.0027431	Q9PNA7	Cj1188c	29	26	27	1.16051	1.29876	0.905176	1.12148	0.3514
Q0P967	Cj1189c	aer2 cetB Cj1189c	Bipartate energy taxis response protein cetB	23	23	20	20	0.752683	0.709219	0.760672	0.714492	0.734267	0.0017552	Q0P967	Cj1189c	19	21	18	0.732754	0.691795	0.70834	0.710963	1.8e-05
Q0P966	Cj1190c	tlp9 cetA Cj1190c	Bipartate energy taxis response protein cetA	39	36	33	30	0.654786	0.720566	0.657257	0.625236	0.664461	0.0055995	Q0P966	Cj1190c	46	41	41	0.879138	0.740059	0.676255	0.765151	0.0172
Q0P965	Cj1191c	aer1 cetC Cj1191c	Putative PAS domain containing signal-transduction sensor protein	16	16	13	13	0.954752	0.776944	0.908636	0.837013	0.869336	0.0903	Q0P965	Cj1191c	13	13	13	0.854464	0.776359	0.977996	0.869607	0.0905
Q0P964	Cj1192	dctA Cj1192	Putative C4-dicarboxylate transport protein	4	4	7	7	1.81167	1.71986	1.27528	1.74208	1.63722	0.0137	Q0P964	Cj1192	7	7	7	3.83958	2.75265	1.3294	2.64054	0.0458
Q0P962	Cj1194	Cj1194	Possible phosphate permease	4	4	4	4	2.13891	1.62469	2.06437	1.59723	1.8563	0.0092	Q0P962	Cj1194	11	8	7	5.22586	5.13449	1.65057	4.00364	0.00187
Q0P961	Cj1195c	pyrC2 Cj1195c	Putative dihydroorotase (EC 3.5.2.3)	34	34	32	32	0.962121	0.992097	0.907089	1.01385	0.968789	0.48799	Q0P961	Cj1195c	24	24	24	1.70384	0.999081	0.895015	1.19931	0.4766
Q9PN99	Cj1196c	gpsA Cj1196c	Glycerol-3-phosphate dehydrogenase [NAD(P)+] (EC 1.1.1.94) (NAD(P)H-dependent glycerol-3-phosphate dehydrogenase)	24	24	21	21	1.07499	1.10613	1.16081	1.03915	1.09527	0.092946	Q9PN99	Cj1196c	14	14	14	1.37933	1.0161	1.38928	1.26157	0.1001
Q9PN98	Cj1197c	gatB Cj1197c	Aspartyl/glutamyl-tRNA(Asn/Gln) amidotransferase subunit B (Asp/Glu-ADT subunit B) (EC 6.3.5.-)	60	60	54	54	1.22645	1.14753	1.28801	1.20788	1.21747	0.0033279	Q9PN98	Cj1197c	41	44	43	1.15573	0.96634	0.754454	0.958842	0.7404
Q9PN97	Cj1198	luxS Cj1198	S-ribosylhomocysteine lyase (EC 4.4.1.21) (AI-2 synthesis protein) (Autoinducer-2 production protein LuxS)	18	18	18	18	1.15625	1.04107	1.24749	1.11301	1.13945	0.07911	Q9PN97	Cj1198	17	17	17	1.18245	0.780703	0.780824	0.91466	0.5585
Q0P956	Cj1200	Cj1200	Putative NLPA family lipoprotein	15	15	14	14	0.715699	0.641389	0.790258	0.726645	0.718498	0.0035	Q0P956	Cj1200	ND	ND	ND	ND	ND	ND	ND	ND
Q9PN94	Cj1201	metE Cj1201	5-methyltetrahydropteroyltriglutamate--homocysteine methyltransferase (EC 2.1.1.14) (Cobalamin-independent methionine synthase) (Methionine synthase, vitamin-B12 independent isozyme)	49	49	49	49	0.559151	0.556752	0.582016	0.588338	0.571564	0.00036372	Q9PN94	Cj1201	18	19	19	1.55813	2.10073	2.12477	1.92788	0.0074
Q0P954	Cj1202	metF Cj1202	Methylenetetrahydrofolate reductase (EC 1.5.1.20)	1	1	ND	ND	0.906542	0.765004	ND	ND	0.835773	ND	Q0P954	Cj1202	ND	ND	ND	ND	ND	ND	ND	ND
Q0P952	Cj1204c	atpB Cj1204c	ATP synthase subunit a (ATP synthase F0 sector subunit a) (F-ATPase subunit 6)	2	2	ND	ND	0.975999	0.899237	ND	ND	0.937618	ND	Q0P952	Cj1204c	2	2	ND	1.45302	0.724237	ND	1.08863	0.7656
Q9PN90	Cj1205c	radA sms Cj1205c	DNA repair protein RadA homolog (DNA repair protein Sms homolog)	12	12	11	11	0.922572	1.07115	1.03309	1.20639	1.0583	0.5432	Q9PN90	Cj1205c	12	11	11	1.67618	1.1592	0.937852	1.25775	0.304
Q0P950	Cj1206c	ftsY Cj1206c	Signal recognition particle receptor FtsY (SRP receptor)	21	21	23	23	0.772796	0.793203	0.781006	0.761318	0.777081	0.00046993	Q0P950	Cj1206c	23	21	24	0.870515	0.913643	0.819449	0.867869	0.0093
Q0P949	Cj1207c	Cj1207c	Putative lipoprotein thioredoxin	6	6	6	6	0.795479	0.887939	0.767632	0.833217	0.821067	0.0102	Q0P949	Cj1207c	7	6	7	1.5422	1.08723	1.03494	1.22146	0.2412
Q0P948	Cj1208	Cj1208	Putative 5-formyltetrahydrofolate cyclo-ligase family protein (EC 6.3.3.2)	5	5	4	4	1.074	1.24637	1.09032	1.10638	1.12927	0.0951	Q0P948	Cj1208	4	3	ND	1.15751	1.17381	ND	1.16566	0.248
Q9PN86	Cj1209	rny Cj1209	Ribonuclease Y (RNase Y) (EC 3.1.-.-)	33	33	30	30	0.856059	0.842594	0.866463	0.872799	0.859479	0.021225	Q9PN86	Cj1209	61	54	59	1.11297	1.14951	0.831508	1.03133	0.7707
Q0P943	Cj1213c	glcD Cj1213c	Putative glycolate oxidase subunit D	34	34	27	27	1.38965	1.09611	1.57112	1.1313	1.29705	0.0774	Q0P943	Cj1213c	26	26	27	0.984792	0.986464	1.78641	1.25256	0.3976
Q0P942	Cj1214c	Cj1214c	Putative exporting protein	17	17	16	16	1.03938	0.869211	1.07382	0.815156	0.949392	0.61785	Q0P942	Cj1214c	12	12	12	0.859557	1.33751	1.17868	1.12525	0.4232
Q0P941	Cj1215	Cj1215	Putative peptidase M23 family protein	18	18	17	17	0.607663	0.71932	0.705974	0.782565	0.70388	0.01362	Q0P941	Cj1215	25	24	27	1.05385	1.22909	0.678155	0.987033	0.0004
Q0P940	Cj1216c	Cj1216c	Putative uncharacterized protein (Group-specific protein)	3	3	4	4	0.576078	0.993322	0.689658	1.02122	0.82007	0.3394	Q0P940	Cj1216c	ND	ND	ND	ND	ND	ND	ND	ND
Q9PN78	Cj1217c	Cj1217c	Purine nucleoside phosphorylase Cj1217c (EC 2.4.2.1) (Adenosine deaminase Cj1217c) (EC 3.5.4.4) (S-methyl-5'-thioadenosine phosphorylase Cj1217c) (EC 2.4.2.28)	11	11	11	11	1.21366	1.47672	1.62044	2.51563	1.70661	0.075068	Q9PN78	Cj1217c	7	7	7	1.38535	1.49367	2.61075	1.82992	0.1682
Q0P938	Cj1218c	ribA Cj1218c	Putative riboflavin synthase alpha chain (EC 2.5.1.9)	15	15	16	16	1.16601	0.926206	1.16734	0.950622	1.05255	0.57933	Q0P938	Cj1218c	12	12	12	1.52765	1.15327	1.09818	1.2597	0.1266
Q0P937	Cj1219c	Cj1219c	Putative periplasmic protein	63	63	58	58	0.861591	0.846782	0.854091	0.863324	0.856447	0.0018	Q0P937	Cj1219c	65	58	63	0.983335	1.18636	0.842516	1.00407	0.9694
P56970	Cj1220	groS groES mopB Cj1220	10 kDa chaperonin (GroES protein) (Protein Cpn10)	13	13	13	13	0.895437	0.888061	0.999537	0.826107	0.902286	0.1442	P56970	Cj1220	12	12	12	1.13977	0.989317	0.770542	0.966543	0.7705
O69289	Cj1221	groL groEL mopA Cj1221	60 kDa chaperonin (GroEL protein) (Protein Cpn60)	76	76	74	74	0.899671	0.950147	0.979931	0.935979	0.941432	0.080936	O69289	Cj1221	80	80	80	1.1506	0.91957	0.94474	1.00497	0.9491
Q0P934	Cj1222c	dccS Cj1222c	Two-component sensor (Histidine kinase)	1	1	3	3	2.21795	1.2983	1.53182	1.89536	1.73586	0.0358	Q0P934	Cj1222c	4	3	3	1.20403	3.19116	2.31394	2.23638	0.1645
Q0P933	Cj1223c	dccR Cj1223c	Two-component regulator	10	10	8	8	1.29888	1.31914	1.4199	1.49272	1.38266	0.028518	Q0P933	Cj1223c	ND	2	3	ND	1.89807	1.4327	1.66539	0.0312
Q0P932	Cj1224	herB Cj1224	Putative iron-binding protein	9	9	7	7	1.06364	0.871312	1.17101	0.931697	1.00942	0.86662	Q0P932	Cj1224	9	9	9	1.13785	0.906869	0.697437	0.914052	0.5363
Q0P931	Cj1225	Cj1225	Putative uncharacterized protein (RHH_3 domain-containing protein)	9	9	9	9	0.743123	0.682499	0.690027	0.676035	0.697921	0.021727	Q0P931	Cj1225	ND	4	5	ND	0.454705	0.669154	0.561929	0.0119
Q0P930	Cj1226c	cprS Cj1226c	Putative two-component sensor (Histidine kinase)	6	6	7	7	0.639534	0.752207	0.630597	0.628687	0.662756	0.0017	Q0P930	Cj1226c	10	10	9	0.742845	0.654009	0.758989	0.718614	0.0012
Q0P929	Cj1227c	cprR Cj1227c	Putative two-component regulator	26	26	26	26	1.02114	0.646894	0.770688	0.911463	0.837547	0.2553	Q0P929	Cj1227c	27	26	26	0.494663	0.770542	1.10722	0.790809	0.303
Q0P928	Cj1228c	htrA Cj1228c	Serine protease (Protease DO) (EC 3.4.21.-)	48	48	44	44	0.843175	0.83838	0.874076	0.862683	0.854578	0.0093118	Q0P928	Cj1228c	61	58	59	0.785471	0.834895	0.973215	0.864527	0.0735
Q0P927	Cj1229	cbpA Cj1229	Putative curved-DNA binding protein	25	25	24	24	0.986298	0.935439	0.986702	0.869856	0.944574	0.27579	Q0P927	Cj1229	31	28	30	1.15721	0.816003	0.951747	0.974987	0.8133
Q0P926	Cj1230	hspR Cj1230	Heat shock transcriptional regulator	6	6	6	6	1.44838	1.19721	1.35283	1.17404	1.29312	0.036508	Q0P926	Cj1230	9	9	9	1.37159	1.37343	1.16007	1.3017	0.0131
Q0P925	Cj1231	kefB Cj1231	Putative glutathione-regulated potassium-efflux system protein	3	3	2	2	0.758382	0.898212	0.756477	0.866379	0.819862	0.0305	Q0P925	Cj1231	5	4	5	1.93173	1.49269	1.69265	1.70569	0.0051
Q0P924	Cj1232	Cj1232	Prephenate dehydrogenase	4	4	6	6	1.37173	0.976842	1.37936	1.05487	1.1957	0.14042	Q0P924	Cj1232	ND	ND	ND	ND	ND	ND	ND	ND
Q0P923	Cj1233	Cj1233	Putative HAD-superfamily hydrolase	11	11	13	13	1.38931	1.51119	1.17095	1.28824	1.33992	0.0183	Q0P923	Cj1233	11	11	11	0.833496	0.806409	0.857758	0.832554	0.0004
Q0P922	Cj1234	glyS Cj1234	Glycine--tRNA ligase beta subunit (EC 6.1.1.14) (Glycyl-tRNA synthetase beta subunit)	41	41	43	43	1.00326	1.07284	0.984506	1.01116	1.01794	0.13607	Q0P922	Cj1234	56	52	55	0.937087	0.93604	0.960214	0.944447	0.021
Q0P921	Cj1235	Cj1235	Putative peptidase M23 family protein	19	19	18	17	0.736318	0.770319	0.678797	0.800229	0.746416	0.049296	Q0P921	Cj1235	16	17	16	1.07775	0.805259	0.52108	0.801362	0.2841
Q0P920	Cj1236	Cj1236	SAM-dependent methyltransferase	15	14	14	14	1.09426	1.06792	1.28174	1.14691	1.14771	0.1074	Q0P920	Cj1236	4	5	5	1.25239	1.36327	0.752319	1.12266	0.5495
Q0P919	Cj1237c	Cj1237c	Putative phosphatase	11	11	12	12	1.12904	1.11049	0.943589	0.987405	1.04263	0.2673	Q0P919	Cj1237c	26	22	23	0.939743	1.02203	1.03572	0.999165	0.9791
Q9PN59	Cj1238	pdxJ Cj1238	Pyridoxine 5'-phosphate synthase (PNP synthase) (EC 2.6.99.2)	19	19	18	18	0.994294	0.994633	0.790431	0.783721	0.89077	0.2908	Q9PN59	Cj1238	16	16	16	1.02655	0.842516	0.551994	0.807022	0.2349
Q9PN58	Cj1239	pdxA Cj1239	4-hydroxythreonine-4-phosphate dehydrogenase (EC 1.1.1.262) (4-(phosphohydroxy)-L-threonine dehydrogenase)	8	8	9	9	1.05566	1.07396	0.730912	0.785749	0.911571	0.35415	Q9PN58	Cj1239	10	9	8	1.08872	0.866225	1.08489	1.01328	0.8655
Q0P916	Cj1240c	Cj1240c	Putative periplasmic protein	14	14	11	11	0.752537	0.707573	0.80718	0.673615	0.735226	0.030252	Q0P916	Cj1240c	10	10	10	1.04046	0.75022	0.509075	0.766585	0.2033
Q0P914	Cj1242	ciaC Cj1242	Invasion antigen CiaC	7	7	5	5	1.23228	1.37085	1.13507	1.01501	1.1883	0.1708	Q0P914	Cj1242	ND	4	3	ND	0.87808	1.28818	1.08313	0.6243
Q9PN54	Cj1243	hemE Cj1243	Uroporphyrinogen decarboxylase (UPD) (URO-D) (EC 4.1.1.37)	27	27	27	27	1.40466	1.1136	1.42834	1.23762	1.29606	0.0563	Q9PN54	Cj1243	22	22	22	0.881469	0.939369	0.892474	0.904437	0.0058
Q0P912	Cj1244	Cj1244	Putative radical SAM domain protein	16	16	22	21	1.37346	1.15379	1.20539	1.22982	1.24061	0.016335	Q0P912	Cj1244	14	16	13	0.967228	1.03896	1.48814	1.16478	0.3693
Q0P911	Cj1245c	Cj1245c	Putative membrane protein	11	11	5	5	0.737204	0.892889	0.658853	0.876235	0.791295	0.0688	Q0P911	Cj1245c	9	11	5	0.671559	0.733285	1.18539	0.863412	0.4465
Q9PN51	Cj1246c	uvrC Cj1246c	UvrABC system protein C (Protein UvrC) (Excinuclease ABC subunit C)	10	10	13	13	0.983982	1.04224	1.43972	2.59887	1.5162	ND	Q9PN51	Cj1246c	11	13	11	1.67249	1.94244	2.83718	2.15071	0.0308
Q0P909	Cj1247c	Cj1247c	Uncharacterized protein	ND	ND	3	3	ND	ND	1.1947	2.94658	2.07064	ND	Q0P909	Cj1247c	ND	3	3	ND	1.54871	2.21693	1.88282	0.1183
Q9PN49	Cj1248	guaA Cj1248	GMP synthase [glutamine-hydrolyzing] (EC 6.3.5.2) (GMP synthetase) (Glutamine amidotransferase)	39	39	41	41	1.20273	1.25729	1.20453	1.20305	1.2169	0.0046408	Q9PN49	Cj1248	38	34	37	1.09631	0.865496	1.10148	1.0211	0.7997
Q0P907	Cj1249	Cj1249	Putative uncharacterized protein (DUF2326 domain-containing protein)	26	26	20	20	1.33906	1.15142	1.08126	1.0989	1.16766	0.1313	Q0P907	Cj1249	27	27	27	1.76664	1.01356	0.834772	1.20499	0.5125
Q9PN47	Cj1250	purD Cj1250	Phosphoribosylamine--glycine ligase (EC 6.3.4.13) (GARS) (Glycinamide ribonucleotide synthetase) (Phosphoribosylglycinamide synthetase)	27	27	26	26	1.04872	1.02288	1.04069	1.00895	1.03031	0.050341	Q9PN47	Cj1250	28	28	28	1.02204	0.918724	0.930356	0.957041	0.2589
Q0P905	Cj1251	Cj1251	RDD domain-containing protein	ND	1	1	1	ND	2.66225	1.32763	0.610431	1.53344	ND	Q0P905	Cj1251	1	1	ND	1.09485	0.533268	ND	0.814058	0.4397
Q0P904	Cj1252	Cj1252	LPS-assembly protein LptD	9	9	8	8	1.3003	1.50238	1.471	1.46474	1.4346	0.0024	Q0P904	Cj1252	20	21	20	1.68848	1.4454	1.54553	1.5598	0.00148
Q0P903	Cj1253	pnp Cj1253	Polyribonucleotide nucleotidyltransferase (EC 2.7.7.8) (Polynucleotide phosphorylase) (PNPase)	64	64	61	61	1.03665	1.01861	1.05429	1.01075	1.03008	0.1082	Q0P903	Cj1253	60	61	64	0.915249	0.98223	0.960051	0.95251	0.0735
Q0P902	Cj1254	Cj1254	UDG domain-containing protein	1	ND	2	2	0.957665	ND	0.459632	1.22995	0.882414	0.7134	Q0P902	Cj1254	ND	1	3	ND	0.666392	1.29978	0.983087	0.9474
Q0P901	Cj1255	Cj1255	Tautomerase (EC 5.3.2.-)	5	5	6	6	0.604215	0.912157	0.495309	0.874996	0.721669	0.143	Q0P901	Cj1255	4	3	ND	1.28216	1.38221	ND	1.33219	0.063
Q0P900	Cj1256c	Cj1256c	Putative membrane protein	10	10	11	11	1.60468	1.58106	1.46318	3.55934	2.05206	0.022873	Q0P900	Cj1256c	11	15	15	1.43672	1.33702	1.73535	1.50303	0.0473
Q0P8Z8	Cj1258	Cj1258	Putative phosphotyrosine protein phosphatase (EC 3.1.3.48)	9	9	8	7	1.40015	1.69654	1.43852	1.47022	1.50136	ND	Q0P8Z8	Cj1258	9	9	9	3.21969	1.90445	1.21056	2.11157	0.1323
P80672	Cj1259	porA Cj1259	Major outer membrane protein (Porin)	29	29	30	30	0.541322	0.613106	0.774008	0.448167	0.594151	0.0171	P80672	Cj1259	40	36	41	0.518144	0.532836	0.740151	0.597043	0.00491
O85213	Cj1260c	dnaJ Cj1260c	Chaperone protein DnaJ	12	11	12	12	1.00463	0.972591	0.966994	0.93921	0.970856	0.60543	O85213	Cj1260c	28	24	27	1.52176	0.63033	0.881467	1.01119	0.9684
Q0P8Z5	Cj1261	racR Cj1261	Two-component regulator	22	22	21	21	0.590962	0.424995	0.828033	0.923012	0.691751	0.014225	Q0P8Z5	Cj1261	22	25	25	0.770542	0.470151	1.04742	0.762705	0.2702
Q0P8Z4	Cj1262	racS Cj1262	Two-component sensor (Histidine kinase)	6	6	7	7	0.880364	0.980553	0.935031	0.97682	0.943192	0.003	Q0P8Z4	Cj1262	12	9	11	1.05222	0.989678	1.16878	1.07023	0.00284
Q9PN35	Cj1263	recR Cj1263	Recombination protein RecR	5	5	6	6	1.05798	0.703995	1.32232	1.22059	1.07622	0.63423	Q9PN35	Cj1263	ND	ND	ND	ND	ND	ND	ND	ND
Q0P8Z2	Cj1264c	hydD Cj1264c	Putative hydrogenase maturation protease	7	7	8	8	1.05483	0.912295	1.24612	0.985931	1.04979	0.67645	Q0P8Z2	Cj1264c	4	4	4	1.26162	1.30078	0.703649	1.08868	0.6695
Q0P8Z1	Cj1265c	hydC Cj1265c	Ni/Fe-hydrogenase B-type cytochrome subunit	2	2	4	4	0.675266	0.941789	0.654193	0.471366	0.685654	0.0965	Q0P8Z1	Cj1265c	5	4	5	1.11003	0.6122	0.266133	0.662789	0.2406
Q0P8Z0	Cj1266c	hydB Cj1266c	Ni/Fe-hydrogenase large subunit (EC 1.12.5.1)	56	56	55	55	0.286948	0.759862	0.652521	0.446181	0.536378	0.0429	Q0P8Z0	Cj1266c	56	54	59	0.446722	0.613047	0.470098	0.509956	0.00072
Q0P8Y9	Cj1267c	hydA Cj1267c	Ni/Fe-hydrogenase small chain (EC 1.12.5.1)	16	16	16	16	1.11711	0.390532	0.721162	0.534357	0.69079	0.2605	Q0P8Y9	Cj1267c	23	22	22	0.739283	0.571556	0.502404	0.604414	0.0049
Q9PN30	Cj1268c	mnmC Cj1268c	tRNA 5-methylaminomethyl-2-thiouridine biosynthesis bifunctional protein MnmC (tRNA mnm(5)s(2)U biosynthesis bifunctional protein) [Includes: tRNA (mnm(5)s(2)U34)-methyltransferase (EC 2.1.1.61); FAD-dependent cmnm(5)s(2)U34 oxidoreductase (EC 1.5.-.-)]	6	6	6	6	0.765813	0.914087	0.857376	0.981689	0.879741	0.1542	Q9PN30	Cj1268c	ND	1	ND	ND	0.926344	ND	0.926344	ND
Q0P8Y7	Cj1269c	amiA Cj1269c	N-acetylmuramoyl-L-alanine amidase (EC 3.5.1.28)	31	31	30	30	0.787318	0.901951	0.803122	0.923191	0.853895	0.0469	Q0P8Y7	Cj1269c	66	59	65	0.82726	1.0559	1.272	1.05172	0.7077
Q0P8Y6	Cj1270c	Cj1270c	Putative 2-nitropropane dioxygenase,oxidoreductase protein	37	37	35	35	0.738664	0.825645	1.00528	0.73547	0.826266	0.1409	Q0P8Y6	Cj1270c	32	32	32	0.708193	0.741246	0.726344	0.725261	8.4e-05
Q9PN27	Cj1271c	tyrS Cj1271c	Tyrosine--tRNA ligase (EC 6.1.1.1) (Tyrosyl-tRNA synthetase) (TyrRS)	44	44	39	39	1.129	1.11456	1.08062	1.04882	1.09325	0.0257	Q9PN27	Cj1271c	44	44	44	1.02231	0.901789	0.903944	0.942682	0.2234
Q0P8Y4	Cj1272c	spoT Cj1272c	Putative guanosine-3',5'-bis(Diphosphate) 3'-pyrophosphohydrolase (EC 3.1.7.2)	21	21	23	23	0.915361	0.934408	0.936253	0.96128	0.936826	0.11214	Q0P8Y4	Cj1272c	34	36	31	0.851145	0.980098	1.12279	0.984678	0.8547
Q9PN25	Cj1273	rpoZ Cj1273	DNA-directed RNA polymerase subunit omega (RNAP omega subunit) (EC 2.7.7.6) (RNA polymerase omega subunit) (Transcriptase subunit omega)	14	14	14	14	0.908513	0.721636	0.977711	0.875229	0.870772	0.12499	Q9PN25	Cj1273	12	12	12	1.25858	0.686714	0.614741	0.853344	0.5113
Q9PN24	Cj1274c	pyrH Cj1274c	Uridylate kinase (UK) (EC 2.7.4.22) (Uridine monophosphate kinase) (UMP kinase) (UMPK)	14	14	14	14	0.997526	0.853217	1.0399	1.0413	0.982984	0.85876	Q9PN24	Cj1274c	17	17	17	0.880835	0.881502	0.682808	0.815048	0.049
Q0P8Y1	Cj1275c	Cj1275c	Putative peptidase M23 family protein	26	26	18	18	0.96027	0.917492	0.957372	0.985286	0.955105	0.251	Q0P8Y1	Cj1275c	35	35	34	0.676833	0.977149	1.145	0.932996	0.6503
Q0P8Y0	Cj1276c	Cj1276c	Putative integral membrane protein	7	7	6	6	1.48364	4.47823	1.54572	2.54096	2.51214	0.016799	Q0P8Y0	Cj1276c	7	7	7	2.44297	2.87298	2.20525	2.50707	0.00194
Q0P8X9	Cj1277c	Cj1277c	Putative ABC transporter ATP-binding protein	12	12	12	12	0.834075	0.863335	0.824303	0.834973	0.839171	0.0051403	Q0P8X9	Cj1277c	20	20	20	1.14251	0.926344	1.22398	1.09761	0.3334
Q9PN20	Cj1278c	trmB Cj1278c	tRNA (guanine-N(7)-)-methyltransferase (EC 2.1.1.33) (tRNA (guanine(46)-N(7))-methyltransferase) (tRNA(m7G46)-methyltransferase)	18	18	15	15	0.801564	0.862866	0.740366	0.895428	0.825056	0.0272	Q9PN20	Cj1278c	25	22	24	1.12213	0.890781	1.04781	1.02024	0.7814
Q0P8X7	Cj1279c	flpA Cj1279c	Putative fibronectin domain-containing lipoprotein	33	33	31	31	0.945921	0.993347	1.01408	0.977375	0.98268	0.84842	Q0P8X7	Cj1279c	36	33	31	1.21311	0.977181	0.902197	1.03083	0.7586
Q0P8X6	Cj1280c	Cj1280c	Pseudouridine synthase (EC 5.4.99.-)	5	5	6	6	0.790327	1.06577	1.48924	1.73334	1.26967	0.4423	Q0P8X6	Cj1280c	7	5	6	3.19859	2.56904	5.70587	3.8245	0.042
Q0P8X5	Cj1282	mrdB Cj1282	RodA protein homolog	1	1	ND	ND	0.813455	1.5267	ND	ND	1.17008	ND	Q0P8X5	Cj1282	ND	1	1	ND	0.95344	0.818596	0.886018	ND
Q0P8X3	Cj1284	ktrA Cj1284	Putative K+ uptake protein	20	20	19	19	0.923866	0.845677	0.894875	0.870027	0.883611	0.0081478	Q0P8X3	Cj1284	17	17	17	1.07646	1.07961	1.16096	1.10568	0.0188
Q0P8X2	Cj1285c	Cj1285c	Chorismate dehydratase (EC 4.2.1.151) (Menaquinone biosynthetic enzyme MqnA)	10	10	14	14	1.07015	1.09489	1.03631	0.923497	1.03121	0.27293	Q0P8X2	Cj1285c	21	18	17	0.836215	1.24642	1.34841	1.14368	0.4106
Q9PN13	Cj1286c	upp Cj1286c	Uracil phosphoribosyltransferase (EC 2.4.2.9) (UMP pyrophosphorylase) (UPRTase)	13	13	16	16	0.953889	1.08665	1.30969	1.55472	1.22624	0.3164	Q9PN13	Cj1286c	13	10	10	2.29848	3.18453	1.41928	2.30076	0.0413
Q0P8X0	Cj1287c	Cj1287c	Malate oxidoreductase (EC 1.1.1.38)	53	53	52	52	0.570429	0.617742	0.67685	0.76803	0.658263	0.0059	Q0P8X0	Cj1287c	47	47	47	0.665234	0.658771	0.6553	0.659768	5.4e-05
O52914	Cj1288c	gltX2 gltX1 Cj1288c	Glutamate--tRNA ligase 2 (EC 6.1.1.17) (Glutamyl-tRNA synthetase 2) (GluRS 2)	60	59	57	56	1.36364	1.21387	1.40865	1.29406	1.32005	0.0063634	O52914	Cj1288c	56	60	55	0.732273	0.921264	0.730932	0.794823	0.0315
Q0P8W8	Cj1289	Cj1289	Possible periplasmic protein	26	26	27	27	1.46221	1.33083	1.39308	1.31198	1.37452	0.0046098	Q0P8W8	Cj1289	21	21	21	1.46701	1.25118	1.4944	1.4042	0.0063
Q0P8W7	Cj1290c	accC Cj1290c	Biotin carboxylase (EC 6.3.4.14) (EC 6.4.1.2)	42	42	38	38	0.677244	0.872449	0.689883	0.698835	0.734603	0.0186	Q0P8W7	Cj1290c	42	42	42	0.597815	0.762075	0.631771	0.663887	0.0026
Q0P8W6	Cj1291c	accB Cj1291c	Putative biotin carboxyl carrier protein of acetyl-CoA carboxylase (EC 6.4.1.2)	10	10	8	8	1.08393	1.13946	1.26446	1.30784	1.19892	0.0645	Q0P8W6	Cj1291c	14	12	11	1.21089	1.07616	1.25573	1.18093	0.0285
Q9PN07	Cj1292	dcd Cj1292	Deoxycytidine triphosphate deaminase (dCTP deaminase) (EC 3.5.4.13)	19	19	18	18	1.12688	1.02833	1.00337	1.02931	1.04697	0.19377	Q9PN07	Cj1292	14	14	14	0.86457	1.02626	1.3276	1.07281	0.62
Q0P8W4	Cj1293	pseB Cj1293	UDP-N-acetylglucosamine 4,6-dehydratase (inverting) (EC 4.2.1.115) (Pseudaminic acid biosynthesis protein B) (UDP-GlcNAc-inverting 4,6-dehydratase)	29	29	31	31	1.08476	0.977629	1.05031	0.956359	1.01726	0.38004	Q0P8W4	Cj1293	29	33	35	1.25061	0.812033	0.820563	0.961068	0.8013
Q0P8W3	Cj1294	pseC Cj1294	UDP-4-amino-4,6-dideoxy-N-acetyl-beta-L-altrosamine transaminase (EC 2.6.1.92) (Pseudaminic acid biosynthesis protein C)	24	24	23	23	1.05083	0.961693	1.15898	1.09747	1.06724	0.3416	Q0P8W3	Cj1294	20	20	20	1.20917	1.11381	0.903482	1.07549	0.4502
Q0P8W2	Cj1295	Cj1295	Putative uncharacterized protein (DUF4910 domain-containing protein)	13	13	13	13	1.45522	1.2397	1.35254	1.17201	1.30487	0.025204	Q0P8W2	Cj1295	ND	ND	1	ND	ND	0.768798	0.768798	ND
Q0P8V8	Cj1299	acpP2 Cj1299	Putative acyl carrier protein	3	3	4	4	1.12408	1.19695	1.62474	1.75859	1.42609	0.0723	Q0P8V8	Cj1299	3	3	3	1.41839	1.31754	1.27825	1.33806	0.0013
Q0P8V7	Cj1300	Cj1300	Putative SAM domain containing methyltransferase	19	19	18	18	0.981135	0.931534	1.08377	1.06394	1.0151	0.54192	Q0P8V7	Cj1300	12	12	12	0.776568	0.972916	1.12686	0.958781	0.7051
Q0P8V6	Cj1301	Cj1301	Putative uncharacterized protein	11	11	9	9	1.26951	0.959915	1.32967	1.06357	1.15567	0.14715	Q0P8V6	Cj1301	ND	7	7	ND	0.983923	1.18484	1.08438	0.3418
Q0P8V5	Cj1302	Cj1302	Putative HAD-superfamily phosphatase, subfamily IIIC	33	33	35	35	1.27199	1.08761	1.17937	1.04132	1.14507	0.1314	Q0P8V5	Cj1302	23	23	23	0.9362	0.950202	1.23151	1.0393	0.7038
Q9PMZ6	Cj1303	Cj1303	Putative 3-oxoacyl-[acyl-carrier-protein] synthase 3 (EC 2.3.1.180) (3-oxoacyl-[acyl-carrier-protein] synthase III) (Beta-ketoacyl-ACP synthase III) (KAS III)	19	19	17	17	1.1862	1.15575	1.28684	1.21923	1.21201	0.0083904	Q9PMZ6	Cj1303	8	8	8	1.30191	1.13549	1.02049	1.15263	0.1351
Q0P8V3	Cj1304	acpP3 Cj1304	Putative acyl carrier protein	5	5	5	5	1.19497	1.26415	1.18814	1.21902	1.21657	0.15014	Q0P8V3	Cj1304	3	4	3	1.50944	1.48497	1.68626	1.56022	0.0009
Q0P8V2	Cj1305c	Cj1305c	Putative uncharacterized protein (DUF2920 family protein)	12	2	12	2	1.37158	1.25239	1.0931	0.982664	1.17493	0.062683	Q0P8V2	Cj1305c	13	ND	ND	1.29722	ND	ND	1.29722	ND
Q0P8V1	Cj1306c	Cj1306c	Putative uncharacterized protein (DUF2920 family protein)	16	7	15	6	0.901279	0.961815	0.959895	0.960418	0.945852	0.10392	Q0P8V1	Cj1306c	19	7	8	0.515087	0.713084	0.911103	0.713091	0.0661
Q0P8V0	Cj1307	Cj1307	Putative amino acid activating enzyme (EC 6.3.2.-)	28	28	29	29	1.22317	1.2523	1.25819	1.39586	1.28238	0.0070271	Q0P8V0	Cj1307	23	28	29	0.892315	1.49066	0.994931	1.12597	0.5327
Q0P8U9	Cj1308	Cj1308	Putative acyl carrier protein	4	4	4	4	0.971675	1.41174	0.931795	1.65422	1.24236	0.1965	Q0P8U9	Cj1308	4	4	4	1.11113	0.725845	1.31331	1.0501	0.7857
Q0P8U8	Cj1309c	Cj1309c	Acyl carrier protein	27	27	27	27	1.36923	1.38208	1.1556	1.15524	1.26554	0.0497	Q0P8U8	Cj1309c	24	24	24	1.34725	1.21741	1.25488	1.27318	0.0021
Q0P8U7	Cj1310c	Cj1310c	Putative uncharacterized protein (DUF2920 family protein)	18	13	15	11	1.02734	1.03537	1.06225	1.06646	1.04785	0.10208	Q0P8U7	Cj1310c	10	9	6	0.637622	0.709576	1.39945	0.915551	0.7456
Q0P8U6	Cj1311	pseF Cj1311	Pseudaminic acid cytidylyltransferase (EC 2.7.7.81) (Pseudaminic acid biosynthesis protein F)	10	10	9	9	1.19701	1.12211	1.14434	1.10971	1.14329	0.056415	Q0P8U6	Cj1311	8	9	9	0.867406	0.801924	0.789437	0.819589	0.0017
Q0P8U5	Cj1312	pseG Cj1312	UDP-2,4-diacetamido-2,4,6-trideoxy-beta-L-altropyranose hydrolase (EC 3.6.1.57) (Pseudaminic acid biosynthesis protein G)	15	15	16	16	1.17947	1.23541	1.47419	1.53575	1.35621	0.0268	Q0P8U5	Cj1312	10	10	10	1.70429	3.29639	1.29574	2.09881	0.0579
Q0P8U4	Cj1313	pseH Cj1313	Acetyltransferase PseH (EC 2.3.1.-) (Pseudaminic acid biosynthesis protein H)	3	3	4	4	1.0117	1.11425	1.25734	1.28294	1.16656	0.080936	Q0P8U4	Cj1313	ND	2	2	ND	0.845056	1.28056	1.06281	0.7246
Q0P8U3	Cj1314c	hisF2 Cj1314c	Putative imidazole glycerol phosphate synthase subunit hisF2 (EC 4.1.3.-) (IGP synthase cyclase subunit) (IGP synthase subunit hisF2) (ImGP synthase subunit hisF2) (IGPS subunit hisF2)	25	25	25	25	1.24031	1.25306	1.82631	2.01909	1.58469	0.006951	Q0P8U3	Cj1314c	14	14	14	2.18877	1.77597	2.1863	2.05035	0.00169
Q0P8U2	Cj1315c	hisH1 Cj1315c	Imidazole glycerol phosphate synthase subunit HisH 1 (EC 2.4.2.-) (IGP synthase glutamine amidotransferase subunit 1) (IGP synthase subunit HisH 1) (ImGP synthase subunit HisH 1) (IGPS subunit HisH 1)	23	23	21	21	1.3585	1.14581	1.35787	1.13472	1.24923	0.0576	Q0P8U2	Cj1315c	12	12	12	1.9281	1.56975	0.907716	1.46852	0.192
Q0P8U1	Cj1316c	pseA Cj1316c	Pseudaminic acid biosynthesis PseA protein	38	38	36	36	1.18397	1.19258	1.17306	1.18831	1.18448	0.00029994	Q0P8U1	Cj1316c	38	38	36	1.09834	0.813573	0.839431	0.917114	0.4135
Q0P8U0	Cj1317	pseI neuB3 Cj1317	Pseudaminic acid synthase (EC 2.5.1.97) (Pseudaminic acid biosynthesis protein I)	39	39	34	34	1.285	1.17021	1.27518	1.12814	1.21463	0.013464	Q0P8U0	Cj1317	34	29	29	1.05134	1.36	1.12147	1.17761	0.1301
Q0P8T8	Cj1319	legB Cj1319	Putative nucleotide sugar dehydratase	21	21	21	21	1.21359	1.23598	1.18615	1.16217	1.19947	0.012796	Q0P8T8	Cj1319	14	14	14	1.16558	1.47504	1.26053	1.30038	0.0304
Q0P8T7	Cj1320	legC Cj1320	Putative aminotransferase (DegT family)	13	13	12	12	0.950608	0.968025	0.855052	0.904232	0.919479	0.051403	Q0P8T7	Cj1320	12	13	14	1.07201	1.08045	1.13371	1.09539	0.078
Q0P8T3	Cj1324	Cj1324	Putative uncharacterized protein (N-acetyl sugar amidotransferase)	38	38	39	39	1.2225	1.23583	1.2663	1.22138	1.2365	0.00046993	Q0P8T3	Cj1324	47	46	46	1.26362	0.907244	1.47109	1.21399	0.2636
Q0P8T2	Cj1325	Cj1325	Putative methyltransferase	18	18	17	17	0.9902	0.822043	0.999201	0.616354	0.85695	0.3488	Q0P8T2	Cj1325	14	14	14	0.724073	0.70873	0.488572	0.640459	0.0091
Q0P8T1	Cj1327	legI ptmC neuB2 Cj1327	N-acetylneuraminic acid synthetase (EC 4.1.3.-) (N,N'-diacetyllegionaminic acid synthase (EC 2.5.1.101))	23	23	19	19	0.771878	0.790504	0.733124	0.718885	0.753598	0.0006	Q0P8T1	Cj1327	38	34	35	0.662483	0.866225	0.966427	0.831712	0.133
Q0P8T0	Cj1328	legG ptmD neuC2 Cj1328	GDP/UDP-N,N'-diacetylbacillosamine 2-epimerase (hydrolyzing) (EC 3.2.1.184)	18	18	17	17	0.956686	0.896723	0.87396	0.846823	0.893548	0.0386	Q0P8T0	Cj1328	19	18	19	1.35443	0.789171	0.614285	0.919294	0.7361
Q0P8S9	Cj1329	ptmE Cj1329	Putative sugar-phosphate nucleotide transferase	24	24	23	23	1.11207	1.16587	1.06749	0.957609	1.07576	0.3171	Q0P8S9	Cj1329	22	22	23	1.34007	1.11009	1.07415	1.17477	0.1039
Q0P8S8	Cj1330	ptmF Cj1330	Putative uncharacterized protein (GFO_IDH_MocA domain-containing protein)	14	14	13	13	1.08873	1.18984	1.09397	1.15849	1.13276	0.0067199	Q0P8S8	Cj1330	13	13	13	1.25134	0.98731	1.10413	1.11426	0.209
Q0P8S7	Cj1331	legF ptmB neuA3 Cj1331	CMP-N,N'-diacetyllegionaminic acid synthase (EC 2.7.7.82)	13	13	14	14	1.02623	0.934212	0.897062	0.823166	0.920166	0.16926	Q0P8S7	Cj1331	20	20	20	1.11929	0.922476	1.08837	1.04338	0.517
Q0P8S6	Cj1332	ptmA Cj1332	Putative oxidoreductase (Flagellin modification)	18	18	16	16	1.18182	1.26175	1.17126	1.27673	1.22289	0.005161	Q0P8S6	Cj1332	7	7	7	0.961347	0.868765	0.917442	0.915851	0.0346
Q0P8S5	Cj1333	pseD Cj1333	PseD protein	36	14	38	16	1.30671	1.16666	1.51088	1.38913	1.34334	0.0177	Q0P8S5	Cj1333	27	14	12	0.908791	1.13041	0.954758	0.997987	0.9766
Q0P8S4	Cj1334	maf3 Cj1334	Putative uncharacterized protein maf3 (MptE-like domain-containing protein)	21	17	25	20	1.34381	1.12252	1.30216	1.09866	1.21679	0.0805	Q0P8S4	Cj1334	18	17	15	0.72752	0.899248	0.721596	0.782788	0.0203
Q0P8S3	Cj1335	maf4 maf1 Cj1318 Cj1335	Putative uncharacterized protein maf1 (Putative uncharacterized protein maf4) (MptE-like domain-containing protein)	44	22	41	20	1.12115	1.04107	1.24443	1.24177	1.16211	0.0946	Q0P8S3	Cj1335	22	11	9	1.04094	1.44754	1.07622	1.18823	0.2213
Q0P8S2	Cj1337	pseE Cj1337	PseE protein	30	25	31	24	1.10813	1.05275	1.04867	1.0359	1.06136	0.091591	Q0P8S2	Cj1337	35	30	29	1.24513	1.34587	0.837436	1.14281	0.4102
P56964	Cj1338c	flaB Cj1338c	Flagellin B	39	15	39	15	0.713956	0.923593	0.721396	0.93357	0.823129	0.11317	P56964	Cj1338c	44	17	15	0.637488	0.972069	1.07458	0.894713	0.4697
P56963	Cj1339c	flaA Cj1339c	Flagellin A	47	23	45	21	0.829984	0.991201	0.787461	0.999146	0.901948	0.20226	P56963	Cj1339c	56	45	27	0.809861	0.735737	0.847597	0.797731	0.035
Q0P8R9	Cj1340c	Cj1340c	Putative uncharacterized protein (MptE-like domain-containing protein)	33	6	35	7	1.0932	1.1713	1.28205	1.17695	1.18088	0.0358	Q0P8R9	Cj1340c	ND	20	3	ND	0.801025	1.12194	0.961485	0.7686
Q0P8R8	Cj1341c	maf6 Cj1341c	Putative uncharacterized protein maf6 (MptE-like domain-containing protein)	37	10	36	9	1.32975	1.17741	1.31376	1.24099	1.26548	0.034628	Q0P8R8	Cj1341c	21	9	4	1.02291	0.795098	0.815187	0.877732	0.1685
Q0P8R7	Cj1342c	maf7 Cj1342c	Putative uncharacterized protein maf7 (DUF2920 family protein)	22	21	18	17	1.31509	1.27071	1.49482	1.63525	1.42897	0.0146	Q0P8R7	Cj1342c	13	17	12	1.94974	1.719	2.48126	2.05	0.0096
Q0P8R6	Cj1343c	Cj1343c	Putative periplasmic protein	1	1	ND	ND	0.950216	0.9635	ND	ND	0.956858	ND	Q0P8R6	Cj1343c	8	8	8	1.88949	1.08723	1.47907	1.48526	0.1042
Q0P8R5	Cj1344c	gcp Cj1344c	Probable tRNA threonylcarbamoyladenosine biosynthesis protein Gcp (t(6)A37 threonylcarbamoyladenosine biosynthesis protein)	17	17	13	13	1.1341	1.20633	1.07722	1.02745	1.11127	0.1259	Q0P8R5	Cj1344c	ND	6	10	ND	0.997471	0.943464	0.970468	0.3883
Q9PMV3	Cj1346c	dxr Cj1346c	1-deoxy-D-xylulose 5-phosphate reductoisomerase (DXP reductoisomerase) (EC 1.1.1.267) (1-deoxyxylulose-5-phosphate reductoisomerase) (2-C-methyl-D-erythritol 4-phosphate synthase)	17	17	19	19	1.10676	1.05048	1.0268	1.03823	1.05557	0.105	Q9PMV3	Cj1346c	15	15	15	0.96695	1.0857	0.980536	1.01106	0.7828
Q0P8R1	Cj1348c	Cj1348c	Putative coiled-coil protein	6	6	7	7	1.07975	1.12606	0.990387	1.0281	1.05608	0.32093	Q0P8R1	Cj1348c	ND	2	2	ND	1.67487	1.30968	1.49227	0.1144
Q0P8R0	Cj1349c	Cj1349c	Putative fibronectin/fibrinogen-binding protein	5	4	4	4	0.97235	0.959291	1.04322	1.20216	1.04426	0.33433	Q0P8R0	Cj1349c	ND	8	8	ND	1.92212	1.51216	1.71714	0.0183
Q9PMU9	Cj1350	mobA Cj1350	Molybdenum cofactor guanylyltransferase (MoCo guanylyltransferase) (EC 2.7.7.77) (GTP:molybdopterin guanylyltransferase) (Mo-MPT guanylyltransferase) (Molybdopterin guanylyltransferase) (Molybdopterin-guanine dinucleotide synthase) (MGD synthase)	2	2	3	3	1.02662	0.99511	0.839442	1.07109	0.983064	0.8641	Q9PMU9	Cj1350	ND	2	2	ND	0.707883	0.867599	0.787741	0.377
Q0P8Q5	Cj1354	ceuD Cj1354	Enterochelin uptake ATP-binding protein	ND	ND	3	ND	ND	ND	2.64658	ND	2.64658	ND	Q0P8Q5	Cj1354	ND	6	ND	ND	3.34297	ND	3.34297	ND
Q0P8Q4	Cj1355	ceuE Cj1355	Enterochelin uptake periplasmic binding protein	27	27	24	24	1.32734	1.63656	1.50141	2.5845	1.76245	0.04315	Q0P8Q4	Cj1355	26	24	26	1.73059	1.97941	2.53989	2.0833	0.0393
Q0P8Q3	Cj1356c	Cj1356c	Putative integral membrane protein	5	5	5	5	0.722293	0.787509	0.758882	0.714247	0.745733	0.0085198	Q0P8Q3	Cj1356c	11	11	11	0.835104	0.915337	0.64115	0.797197	0.0674
Q0P8Q2	Cj1357c	nrfA Cj1357c	Nitrite reductase (cytochrome; ammonia-forming) (EC 1.7.2.2)	36	36	31	31	1.07723	1.02093	1.02888	0.928826	1.01397	0.67988	Q0P8Q2	Cj1357c	53	55	52	0.737267	0.756428	0.708806	0.734167	4.6e-05
Q0P8Q1	Cj1358c	nrfH Cj1358c	Putative periplasmic cytochrome C (Nitrite reductase cytochrome c-type)	1	1	2	2	1.27743	1.23083	1.25567	1.47694	1.31022	0.0214	Q0P8Q1	Cj1358c	ND	2	2	ND	1.06352	0.749195	0.906356	0.4825
Q9PMU0	Cj1359	ppk1 Cj1359	Polyphosphate kinase (EC 2.7.4.1) (ATP-polyphosphate phosphotransferase) (Polyphosphoric acid kinase)	38	38	42	42	0.812512	0.878431	0.866933	0.839242	0.84928	0.0024	Q9PMU0	Cj1359	49	48	49	0.823126	1.41891	0.87808	1.04004	0.8435
Q0P8P8	Cj1361c	Cj1361c	Putative uncharacterized protein (Histidine phosphotransferase)	6	6	4	4	1.44845	1.42045	1.2956	1.45705	1.40539	0.0017	Q0P8P8	Cj1361c	ND	2	ND	ND	2.81297	ND	2.81297	ND
Q9PMT7	Cj1362	ruvB Cj1362	Holliday junction ATP-dependent DNA helicase RuvB (EC 3.6.4.12)	21	21	20	20	1.11471	1.73946	0.947068	1.22394	1.2563	0.49006	Q9PMT7	Cj1362	14	14	14	2.62002	2.11356	1.26143	1.99834	0.0655
Q0P8P6	Cj1363	amaA Cj1363	Acid membrane antigen A	1	1	ND	ND	1.08777	0.776893	ND	ND	0.932331	ND	Q0P8P6	Cj1363	ND	ND	ND	ND	ND	ND	ND	ND
O69294	Cj1364c	fumC Cj1364c	Fumarate hydratase class II (Fumarase C) (EC 4.2.1.2)	40	40	40	40	0.732437	0.709324	0.795016	0.788604	0.756345	0.012807	O69294	Cj1364c	49	49	49	0.778367	0.756148	0.688046	0.740854	0.0007
Q0P8P4	Cj1365c	Cj1365c	Putative secreted serine protease (EC 3.4.21.-)	24	24	19	19	1.16476	1.13583	1.20314	1.37676	1.22012	0.01362	Q0P8P4	Cj1365c	39	34	33	1.32997	1.78568	1.41324	1.50963	0.022
Q9PMT4	Cj1366c	glmS Cj1366c	Glutamine--fructose-6-phosphate aminotransferase [isomerizing] (EC 2.6.1.16) (D-fructose-6-phosphate amidotransferase) (GFAT) (Glucosamine-6-phosphate synthase) (Hexosephosphate aminotransferase) (L-glutamine--D-fructose-6-phosphate amidotransferase)	36	36	30	30	0.926889	0.997218	0.872433	0.950266	0.936702	0.1791	Q9PMT4	Cj1366c	43	36	40	0.886787	1.01441	1.31022	1.07047	0.6042
Q0P8P2	Cj1367c	Cj1367c	Putative nucleotidyltransferase	17	17	15	15	1.06042	0.997775	0.960564	0.929811	0.987142	0.93439	Q0P8P2	Cj1367c	28	27	27	0.595052	1.01123	0.959368	0.855217	0.3309
Q0P8P1	Cj1368	Cj1368	Aminodeoxyfutalosine synthase (AFL synthase) (Aminofutalosine synthase) (EC 2.5.1.120) (Menaquinone biosynthetic enzyme MqnE)	43	43	47	47	1.14571	1.03106	1.17422	1.05693	1.10198	0.1192	Q0P8P1	Cj1368	38	44	43	0.995486	1.23365	1.19719	1.14211	0.1275
Q0P8P0	Cj1369	Cj1369	Putative permease	2	2	2	2	0.381538	0.400534	0.715949	0.829891	0.581978	0.0341	Q0P8P0	Cj1369	4	3	ND	0.762922	0.862019	ND	0.812471	0.0633
Q0P8N9	Cj1370	Cj1370	Putative nucleotide phosphoribosyltransferase	17	17	14	14	0.820465	0.829902	0.896108	0.924204	0.86767	0.02714	Q0P8N9	Cj1370	10	10	10	0.843827	1.27043	1.13549	1.08325	0.5446
Q0P8N8	Cj1371	Cj1371	Putative periplasmic protein (VacJ homolog)	5	5	3	3	0.827965	0.861821	0.695889	0.758617	0.786073	0.0181	Q0P8N8	Cj1371	5	5	5	0.951004	0.729898	0.695994	0.792299	0.0602
Q0P8N7	Cj1372	Cj1372	Putative periplasmic protein	9	9	9	9	1.62534	1.55232	2.12074	1.94636	1.81119	0.015099	Q0P8N7	Cj1372	7	7	7	3.09945	1.51999	1.37594	1.99846	0.0197
Q0P8N6	Cj1373	Cj1373	Putative integral membrane protein	7	7	12	12	1.82787	1.9944	1.42495	1.26052	1.62694	0.035	Q0P8N6	Cj1373	11	11	11	1.57365	1.4708	1.60991	1.55146	0.00021
Q9PMS6	Cj1374c	Cj1374c	Non-canonical purine NTP pyrophosphatase (EC 3.6.1.19) (Non-standard purine NTP pyrophosphatase) (Nucleoside-triphosphate diphosphatase) (Nucleoside-triphosphate pyrophosphatase) (NTPase)	11	11	11	11	1.33601	1.27777	1.51218	1.31102	1.35924	0.0022753	Q9PMS6	Cj1374c	14	14	14	1.38481	1.08638	1.36756	1.27958	0.0445
Q0P8N4	Cj1375	Cj1375	Putative multidrug efflux transporter	ND	ND	2	2	ND	ND	0.858033	0.601033	0.729533	ND	Q0P8N4	Cj1375	ND	4	4	ND	0.856064	0.577213	0.716638	0.0721
Q0P8N3	Cj1376	Cj1376	Putative periplasmic protein	4	3	3	3	0.809843	0.829605	0.767263	0.770457	0.794292	0.0081	Q0P8N3	Cj1376	9	5	8	1.49516	1.09823	1.51654	1.36998	0.053
Q0P8N2	Cj1377c	Cj1377c	Putative ferredoxin	27	27	28	28	0.645981	0.874002	0.67685	0.563174	0.690002	0.0349	Q0P8N2	Cj1377c	20	20	20	0.59571	0.625748	0.476171	0.565876	0.0007
Q9PMS2	Cj1378	selA Cj1378	L-seryl-tRNA(Sec) selenium transferase (EC 2.9.1.1) (Selenocysteine synthase) (Sec synthase) (Selenocysteinyl-tRNA(Sec) synthase)	21	21	20	20	0.843328	0.977686	0.857444	0.890272	0.892182	0.0757	Q9PMS2	Cj1378	21	20	24	1.82613	0.710423	0.846041	1.12753	0.7351
Q0P8N0	Cj1379	selB Cj1379	Putative selenocysteine-specific elongation factor	5	5	1	1	0.895353	1.17251	0.533372	0.677933	0.819792	0.21419	Q0P8N0	Cj1379	20	20	20	0.721593	0.8857	0.953943	0.853746	0.1012
Q0P8M9	Cj1380	Cj1380	Putative periplasmic protein	16	16	16	16	0.674027	0.733802	0.395099	0.576061	0.594747	0.0218	Q0P8M9	Cj1380	26	24	25	0.762526	0.512284	0.327679	0.534163	0.0209
Q0P8M8	Cj1381	Cj1381	Putative lipoprotein	2	2	3	3	0.912206	1.18126	0.959293	0.922681	0.993861	0.97808	Q0P8M8	Cj1381	ND	7	7	ND	1.01102	1.34788	1.17945	0.2482
Q0P8M7	Cj1382c	fldA Cj1382c	Flavodoxin	12	12	11	11	1.03091	1.07278	1.04288	1.18777	1.08358	0.1948	Q0P8M7	Cj1382c	12	12	12	1.44291	0.863685	0.861027	1.05588	0.7871
Q0P8M5	Cj1384c	Cj1384c	Uncharacterized protein (DUF2325 domain-containing protein)	ND	ND	2	2	ND	ND	3.84388	5.32922	4.58655	0.0403	Q0P8M5	Cj1384c	ND	3	5	ND	3.61054	5.55906	4.5848	0.0466
Q59296	Cj1385	katA Cj1385	Catalase (EC 1.11.1.6)	9	9	7	7	1.33791	1.57678	1.34234	1.91499	1.543	0.0066743	Q59296	Cj1385	37	35	35	2.40063	2.35312	3.51352	2.75575	0.00981
Q0P8M2	Cj1387c	cfiR Cj1387c	Helix-turn-helix containing protein	8	8	7	7	1.18592	1.34849	1.52052	1.74704	1.45049	0.0331	Q0P8M2	Cj1387c	4	4	4	2.44696	1.95765	1.35649	1.92037	0.0433
Q0P8M1	Cj1388	cfiP Cj1388	Putative endoribonuclease L-PSP	10	10	5	5	1.06954	1.19946	0.847837	0.965295	1.02053	0.77394	Q0P8M1	Cj1388	ND	5	9	ND	0.825581	1.08147	0.953525	0.6594
Q0P8L8	Cj1394	Cj1394	Adenylosuccinate lyase (ASL) (EC 4.3.2.2) (Adenylosuccinase)	1	1	2	2	1.11514	1.28918	1.51444	1.23577	1.28863	0.5214	Q0P8L8	Cj1394	6	4	5	3.69447	2.34634	1.42635	2.48906	0.0866
Q9PMR0	Cj1397	Cj1397	Uncharacterized protein Cj1397	4	4	5	5	1.3168	1.13872	1.13731	1.09801	1.17271	0.0783	Q9PMR0	Cj1397	ND	ND	ND	ND	ND	ND	ND	ND
Q9PMQ9	Cj1398	feoB Cj1398	Fe(2+) transporter FeoB (Ferrous iron transport protein B homolog)	2	2	2	2	0.984366	1.94181	1.02614	1.35584	1.32704	0.2357	Q9PMQ9	Cj1398	4	3	4	3.04169	2.21389	1.2769	2.17749	0.0477
Q0P8L5	Cj1399c	hydA2 Cj1399c	Putative Ni/Fe-hydrogenase small subunit	30	30	28	28	1.50172	1.40011	1.45823	1.42122	1.44532	0.00013766	Q0P8L5	Cj1399c	24	24	24	1.19051	1.12623	0.836077	1.05094	0.6646
Q0P8L4	Cj1400c	fabI Cj1400c	Enoyl-[acyl-carrier-protein] reductase [NADH] (EC 1.3.1.9)	23	23	21	21	0.849727	0.882024	1.0617	0.863752	0.9143	0.15455	Q0P8L4	Cj1400c	20	23	21	1.28731	0.720813	0.768002	0.925374	0.702
Q9PMQ6	Cj1401c	tpiA Cj1401c	Triosephosphate isomerase (TIM) (EC 5.3.1.1) (Triose-phosphate isomerase)	15	15	15	15	0.948445	0.748079	0.931954	0.725709	0.838547	0.10591	Q9PMQ6	Cj1401c	9	9	9	1.43181	0.78155	0.808752	1.00737	0.974
Q9PMQ5	Cj1402c	pgk Cj1402c	Phosphoglycerate kinase (EC 2.7.2.3)	33	33	33	33	0.927152	0.91775	0.914673	0.92321	0.920696	0.015917	Q9PMQ5	Cj1402c	33	33	35	0.806887	0.857286	1.07707	0.913746	0.3571
Q0P8L1	Cj1403c	gapA Cj1403c	Glyceraldehyde 3-phosphate dehydrogenase	28	28	26	26	1.32475	1.35464	1.31908	1.3209	1.32984	0.00015	Q0P8L1	Cj1403c	33	33	33	1.98252	1.50987	1.57177	1.68805	0.0097
Q9PMQ3	Cj1404	nadD Cj1404	Probable nicotinate-nucleotide adenylyltransferase (EC 2.7.7.18) (Deamido-NAD(+) diphosphorylase) (Deamido-NAD(+) pyrophosphorylase) (Nicotinate mononucleotide adenylyltransferase) (NaMN adenylyltransferase)	9	9	8	8	1.35823	1.42613	1.29411	1.20819	1.32166	0.015871	Q9PMQ3	Cj1404	5	5	5	0.693929	1.37173	1.0483	1.03799	0.8556
Q0P8K9	Cj1405	rsfS Cj1405	Ribosomal silencing factor RsfS	3	3	6	6	1.48267	1.09143	1.27597	1.1088	1.23972	0.1541	Q0P8K9	Cj1405	2	2	2	1.04649	1.30654	1.2326	1.19521	0.0651
Q0P8K8	Cj1406c	Cj1406c	Putative periplasmic protein	12	12	12	12	0.421289	0.595884	0.413043	0.665501	0.523929	0.007425	Q0P8K8	Cj1406c	ND	6	6	ND	0.741753	0.709061	0.725407	0.0035
Q0P8K7	Cj1407c	pgmL Cj1407c	Putative phospho-sugar mutase (EC 5.4.2.-)	40	40	38	38	1.23849	1.21698	1.13053	1.22424	1.20256	0.035904	Q0P8K7	Cj1407c	15	15	15	1.66323	1.52726	1.36581	1.51877	0.0038
Q0P8K6	Cj1408	fliL Cj1408	Flagellar protein FliL	5	5	4	4	0.948451	1.05498	0.866323	1.04025	0.977502	0.78733	Q0P8K6	Cj1408	10	10	10	1.0717	0.753607	0.672273	0.832528	0.2414
Q9PMP8	Cj1409	acpS Cj1409	Holo-[acyl-carrier-protein] synthase (Holo-ACP synthase) (EC 2.7.8.7) (4'-phosphopantetheinyl transferase AcpS)	4	4	3	3	1.27299	1.19951	1.11745	1.02498	1.15373	0.1274	Q9PMP8	Cj1409	ND	ND	ND	ND	ND	ND	ND	ND
Q0P8K4	Cj1410c	Cj1410c	Putative membrane protein	ND	ND	2	2	ND	ND	0.784273	0.727303	0.755788	ND	Q0P8K4	Cj1410c	ND	3	2	ND	0.642683	0.586129	0.614406	0.0004
Q0P8K3	Cj1411c	Cj1411c	Putative cytochrome P450	20	20	17	17	0.919155	0.91195	0.891509	0.894429	0.904261	0.0095934	Q0P8K3	Cj1411c	28	28	28	1.09132	1.09428	0.828785	1.0048	0.9591
Q0P8K2	Cj1412c	Cj1412c	Putative integral membrane protein	3	3	3	3	0.734156	0.606489	0.737665	0.841941	0.730063	0.0202	Q0P8K2	Cj1412c	ND	3	6	ND	0.696028	1.01428	0.855153	0.3092
Q0P8K1	Cj1413c	kpsS Cj1413c	Capsule polysaccharide modification protein	2	2	6	6	0.927825	2.56442	1.37629	2.411	1.81988	0.033315	Q0P8K1	Cj1413c	11	11	11	1.34111	3.87049	2.2196	2.47706	0.1846
Q0P8K0	Cj1414c	kpsC Cj1414c	Capsule polysaccharide modification protein	20	19	17	17	1.10498	1.11375	1.10203	1.34762	1.1671	0.27265	Q0P8K0	Cj1414c	22	20	21	1.70845	1.52534	1.63761	1.6238	0.0003
Q0P8J9	Cj1415c	cysC Cj1415c	Putative adenylylsulfate kinase (EC 2.7.1.25)	13	13	13	13	1.23915	1.33209	2.38791	1.30612	1.56632	ND	Q0P8J9	Cj1415c	8	8	8	1.93751	1.42371	1.46158	1.6076	0.0213
Q0P8J8	Cj1416c	Cj1416c	CTP:phosphoglutamine cytidylyltransferase (EC 2.7.7.103)	15	15	12	12	0.856949	0.940452	1.03717	1.04186	0.969107	0.57933	Q0P8J8	Cj1416c	12	12	10	0.968637	1.0686	1.27372	1.10365	0.3126
Q0P8J7	Cj1417c	Cj1417c	Gamma-glutamyl-CDP-amidate hydrolase (EC 3.5.1.129)	11	11	10	10	0.51078	0.629601	0.271956	0.543396	0.488933	0.0112	Q0P8J7	Cj1417c	3	3	3	0.534597	0.725665	0.454016	0.571426	0.00601
Q0P8J6	Cj1418c	Cj1418c	L-glutamine kinase (EC 2.7.3.13)	50	50	39	39	1.16427	1.17001	1.21734	1.2501	1.20043	0.0055496	Q0P8J6	Cj1418c	49	50	48	1.08429	1.45409	1.0288	1.18906	0.2296
Q0P8J5	Cj1419c	Cj1419c	Putative methyltransferase	17	17	18	18	1.82318	1.52118	1.69513	1.49575	1.63381	0.0029827	Q0P8J5	Cj1419c	19	17	18	1.34258	1.6531	1.41411	1.46993	0.00751
Q0P8J4	Cj1420c	Cj1420c	Putative methyltransferase	31	31	32	32	0.521138	0.49031	0.674243	0.847933	0.633406	0.0408	Q0P8J4	Cj1420c	31	32	33	0.55389	0.680649	0.631675	0.622071	0.00051
Q0P8J3	Cj1421c	Cj1421c	Putative sugar transferase	10	3	10	2	0.95492	0.847508	0.88347	0.907888	0.898447	0.2218	Q0P8J3	Cj1421c	24	12	8	1.04938	1.03254	0.831546	0.971157	0.7013
Q0P8J2	Cj1422c	Cj1422c	Putative sugar transferase	15	8	13	5	1.06454	1.54097	1.31112	2.28057	1.5493	0.1274	Q0P8J2	Cj1422c	28	15	12	1.78985	1.21678	5.42962	2.81209	0.2415
Q0P8J1	Cj1423c	hddC Cj1423c	D-glycero-alpha-D-manno-heptose 1-phosphate guanylyltransferase (EC 2.7.7.71) (D-alpha-D-heptose 1-phosphate guanylyltransferase)	11	11	10	10	1.31116	1.1669	1.25868	1.1659	1.22566	0.021707	Q0P8J1	Cj1423c	ND	ND	3	ND	ND	1.21509	1.21509	ND
Q9PMN3	Cj1424c	gmhA2 Cj1424c	Phosphoheptose isomerase 2 (EC 5.3.1.28) (Sedoheptulose 7-phosphate isomerase 2)	13	12	12	11	1.13287	1.14929	1.25409	1.25336	1.1974	0.0158	Q9PMN3	Cj1424c	12	12	11	1.15908	1.11856	0.632234	0.969957	0.8677
Q0P8I9	Cj1425c	hddA Cj1425c	D-glycero-alpha-D-manno-heptose 7-phosphate kinase (EC 2.7.1.168) (D-alpha-D-heptose 7-phosphate kinase)	12	12	11	11	0.732921	0.808233	0.655405	0.73659	0.733287	0.0047	Q0P8I9	Cj1425c	16	12	11	0.887581	1.1863	1.27298	1.11562	0.378
Q0P8I8	Cj1426c	Cj1426c	Putative methyltransferase family protein	9	9	13	13	1.56652	1.24433	1.52827	1.43016	1.44232	0.01031	Q0P8I8	Cj1426c	8	8	8	0.980899	1.14536	1.30738	1.14455	0.1999
Q0P8I7	Cj1427c	Cj1427c	GDP-D-glycero-alpha-D-manno-heptose dehydrogenase (EC 1.1.98.-)	37	37	36	36	1.27124	1.03135	1.31621	1.18557	1.20109	0.0994	Q0P8I7	Cj1427c	32	32	32	1.19958	1.0148	0.822194	1.01219	0.9163
Q0P8I6	Cj1428c	fcl Cj1428c	GDP-L-fucose synthetase (EC 1.1.1.271)	38	38	35	35	1.10553	1.02595	1.03593	1.00823	1.04391	0.18877	Q0P8I6	Cj1428c	33	35	38	0.957848	0.877233	0.904819	0.9133	0.0215
Q0P8I5	Cj1429c	Cj1429c	Putative uncharacterized protein (Methyltransf_21 domain-containing protein)	5	5	3	3	1.4102	1.38944	1.57567	1.32626	1.42539	0.0041	Q0P8I5	Cj1429c	8	7	5	4.58458	1.5106	1.94062	2.6786	0.0316
Q0P8I4	Cj1430c	rfbC Cj1430c	Putative dTDP-4-dehydrorhamnose 3,5-epimerase (EC 5.1.3.13)	23	23	22	22	1.48937	1.08354	1.75946	1.62591	1.48957	0.0441	Q0P8I4	Cj1430c	11	11	11	1.50484	2.55623	1.33364	1.79824	0.0233
Q0P8I3	Cj1431c	hddC Cj1431c	Capsular polysaccharide heptosyltransferase	26	25	24	23	0.931926	0.954355	0.928519	0.932386	0.936797	0.041739	Q0P8I3	Cj1431c	24	24	23	1.16406	1.05505	1.20057	1.13989	0.329
Q0P8I2	Cj1432c	Cj1432c	Putative sugar transferase	48	48	41	41	0.8132	0.822738	0.866198	0.851314	0.838362	0.0078847	Q0P8I2	Cj1432c	57	48	55	1.16927	1.03981	1.1537	1.12093	0.0414
Q0P8I1	Cj1433c	Cj1433c	Putative uncharacterized protein (4Fe-4S cluster-binding domain-containing protein)	26	26	21	21	0.796661	0.808618	0.82532	0.896356	0.831739	0.0074	Q0P8I1	Cj1433c	18	21	26	0.880203	0.923474	0.866045	0.889907	0.0031
Q0P8I0	Cj1434c	Cj1434c	Putative sugar transferase	36	9	29	8	0.768677	0.871322	0.715799	0.843738	0.799884	0.0197	Q0P8I0	Cj1434c	38	29	12	0.845147	1.26913	0.886547	1.00027	0.9985
Q0P8H9	Cj1435c	Cj1435c	Putative phosphatase	13	13	10	10	1.27647	1.19966	1.36206	1.31026	1.28711	0.047512	Q0P8H9	Cj1435c	11	11	10	2.0898	1.90338	1.89271	1.96196	0.0001
Q0P8H8	Cj1436c	Cj1436c	L-serine phosphate decarboxylase Cj1436c (EC 4.1.1.-) (Capsule polysaccharide biosynthesis protein Cj1436c) (PLP-dependent decarboxylase Cj1436)	14	14	14	14	0.787205	0.943339	0.938703	0.921851	0.897775	0.1405	Q0P8H8	Cj1436c	12	12	12	0.822246	1.03906	1.13391	0.998406	0.987
Q0P8H7	Cj1437c	Cj1437c	Dihydroxyacetone phosphate transaminase Cj1437c (EC 2.6.1.-) (Capsule polysaccharide biosynthesis protein Cj1437c) (PLP-dependent transaminase Cj1437)	24	24	25	25	1.01608	1.03253	0.974888	1.01192	1.00885	0.43183	Q0P8H7	Cj1437c	17	21	20	1.42805	0.77901	0.750441	0.985833	0.952
Q0P8H6	Cj1438c	Cj1438c	Putative sugar transferase	54	27	50	29	0.684619	0.774993	0.750445	0.892042	0.775525	0.0259	Q0P8H6	Cj1438c	72	54	46	1.17882	0.865378	0.953079	0.999094	0.9927
Q0P8H5	Cj1439c	glf Cj1439c	UDP-galactopyranose mutase (EC 5.4.99.9)	30	30	31	31	1.12415	1.04909	1.09762	1.02833	1.0748	0.0855	Q0P8H5	Cj1439c	31	36	36	1.08954	0.853122	0.783244	0.908636	0.38
Q0P8H4	Cj1440c	Cj1440c	Putative sugar transferase	6	4	6	4	0.890854	2.46559	1.30591	1.23464	1.47425	ND	Q0P8H4	Cj1440c	9	6	7	3.29685	1.50044	1.40607	2.06779	0.0132
Q0P8H3	Cj1441c	kfiD Cj1441c	UDP-glucose 6-dehydrogenase (EC 1.1.1.22)	28	28	31	31	0.799553	0.857486	0.867132	0.891507	0.85392	0.0075	Q0P8H3	Cj1441c	36	36	31	0.868748	0.94836	0.813706	0.876938	0.0436
Q0P8H2	Cj1442c	Cj1442c	Putative sugar transferase	4	4	3	3	1.27719	1.15961	0.905138	1.0034	1.08633	0.28665	Q0P8H2	Cj1442c	13	13	13	1.10656	1.04404	1.36994	1.17351	0.1573
Q0P8H1	Cj1443c	kpsF Cj1443c	D-arabinose 5-phosphate isomerase	23	23	24	24	1.16539	1.46804	1.23988	1.3864	1.31493	0.018553	Q0P8H1	Cj1443c	25	25	24	2.11485	1.30569	1.32634	1.58229	0.0419
Q0P8H0	Cj1444c	kpsD Cj1444c	Capsule polysaccharide export system periplasmic protein	36	36	29	29	1.25369	1.13777	1.16369	1.1	1.16379	0.030002	Q0P8H0	Cj1444c	36	40	40	1.36325	0.867567	0.808628	1.01315	0.944
Q0P8G9	Cj1445c	kpsE Cj1445c	Capsule polysaccharide export system inner membrane protein	27	27	22	22	0.696518	0.778909	0.731738	0.813629	0.755199	0.0049	Q0P8G9	Cj1445c	27	27	26	0.659134	1.0432	1.16484	0.955722	0.7858
Q0P8G8	Cj1447c	kpsT Cj1447c	Capsule polysaccharide export ATP-binding protein	6	6	8	8	1.014	1.29623	1.24509	2.04858	1.40098	0.091801	Q0P8G8	Cj1447c	9	8	9	2.52714	1.34549	1.93028	1.9343	0.042
Q9PML1	Cj1449c	Cj1449c	UPF0306 protein Cj1449c	ND	ND	1	1	ND	ND	0.776254	0.752166	0.76421	ND	Q9PML1	Cj1449c	ND	ND	ND	ND	ND	ND	ND	ND
Q0P8G5	Cj1450	ciaI Cj1450	Putative ATP/GTP-binding protein	5	5	4	4	1.23997	1.25993	1.9318	1.41709	1.4622	ND	Q0P8G5	Cj1450	6	5	4	1.80166	1.53086	2.41407	1.91553	0.0248
Q0P8G4	Cj1451	dut Cj1451	dUTPase (EC 3.6.1.23)	10	10	9	9	1.30237	1.16096	1.37274	1.9806	1.45417	0.0869	Q0P8G4	Cj1451	10	11	11	2.0403	2.4172	0.998318	1.8186	0.1259
Q9PMK7	Cj1453c	tilS Cj1453c	tRNA(Ile)-lysidine synthase (EC 6.3.4.19) (tRNA(Ile)-2-lysyl-cytidine synthase) (tRNA(Ile)-lysidine synthetase)	9	9	5	5	0.883846	0.797611	0.639925	0.720572	0.760489	0.0377	Q9PMK7	Cj1453c	4	5	4	2.73005	1.52923	1.16161	1.80696	0.1636
Q0P8G1	Cj1454c	rimO Cj1454c	Ribosomal protein S12 methylthiotransferase RimO (S12 MTTase) (S12 methylthiotransferase) (EC 2.-.-.-) (Ribosome maturation factor RimO)	40	40	34	34	1.41318	1.37329	1.30304	1.314	1.35088	0.0018587	Q0P8G1	Cj1454c	25	28	24	1.07723	1.65707	0.960316	1.23154	0.343
Q9PMK5	Cj1455	prfB Cj1455	Peptide chain release factor 2 (RF-2)	28	27	26	25	1.23291	1.10716	1.20543	1.17028	1.17894	0.024877	Q9PMK5	Cj1455	19	19	19	0.947167	0.823702	1.07537	0.948747	0.5195
Q9PMK3	Cj1457c	truD Cj1457c	tRNA pseudouridine synthase D (EC 5.4.99.27) (tRNA pseudouridine(13) synthase) (tRNA pseudouridylate synthase D) (tRNA-uridine isomerase D)	11	11	13	13	1.15006	1.30081	1.59438	1.27499	1.33006	0.0794	Q9PMK3	Cj1457c	16	11	13	1.88231	1.41407	1.87035	1.72224	0.0094
Q0P8F7	Cj1458c	thiL Cj1458c	Thiamine-monophosphate kinase (TMP kinase) (Thiamine-phosphate kinase) (EC 2.7.4.16)	5	5	4	4	0.886243	0.872001	0.876378	1.01431	0.912232	0.11897	Q0P8F7	Cj1458c	ND	3	ND	ND	1.27436	ND	1.27436	ND
Q0P8F6	Cj1459	Cj1459	Putative uncharacterized protein (DUF5644 domain-containing protein)	30	30	27	27	0.790149	0.834334	0.847661	0.848918	0.830266	0.0055496	Q0P8F6	Cj1459	31	30	30	0.812267	0.968682	0.71592	0.83229	0.0851
Q0P8F5	Cj1460	Cj1460	Ornithine carbamoyltransferase	18	18	15	15	1.49917	2.11963	1.70472	1.60867	1.73305	0.0011709	Q0P8F5	Cj1460	10	15	18	2.49904	4.24709	1.45486	2.73366	0.0785
Q0P8F4	Cj1461	Cj1461	Putative DNA methylase	3	3	8	8	3.25037	2.09197	0.920133	1.41193	1.9186	0.145	Q0P8F4	Cj1461	8	8	8	2.4736	4.20199	1.66039	2.77866	0.0367
Q9PMJ8	Cj1462	flgI Cj1462	Flagellar P-ring protein (Basal body P-ring protein)	14	14	13	13	1.85452	1.22018	1.07305	1.38818	1.38398	0.1084	Q9PMJ8	Cj1462	20	20	20	1.49136	1.51818	1.28025	1.42993	0.00463
Q0P8F1	Cj1464	flgM Cj1464	Flagellar biosynthesis anti-sigma factor FlgM	12	12	12	12	0.588505	0.854544	0.731738	0.955083	0.782468	0.1409	Q0P8F1	Cj1464	ND	4	7	ND	0.463172	0.818106	0.640639	0.1802
Q0P8F0	Cj1465	Cj1465	Flagellar protein FlgN	18	18	20	20	1.22911	1.06738	1.2895	1.03688	1.15572	0.166	Q0P8F0	Cj1465	11	11	11	1.12734	1.2411	1.02402	1.13082	0.1052
Q0P8E9	Cj1466	flgK Cj1466	Flagellar hook-associated protein 1	1	1	5	5	1.21528	1.66894	1.23049	1.3153	1.3575	0.0434	Q0P8E9	Cj1466	15	15	15	2.53093	1.39798	1.47429	1.80107	0.0094
Q0P8E8	Cj1467	Cj1467	Uncharacterized protein (TIGR02757 family protein)	1	1	ND	ND	1.12111	1.57439	ND	ND	1.34775	ND	Q0P8E8	Cj1467	5	5	ND	1.60065	2.77649	ND	2.18857	0.0189
Q0P8E6	Cj1471c	ctsE Cj1471c	Putative type II protein secretion system E protein	2	2	3	3	0.924398	1.49126	1.73861	1.70078	1.46376	0.0901	Q0P8E6	Cj1471c	9	9	9	3.76114	5.22804	1.8764	3.62186	0.0339
Q0P8E4	Cj1473c	ctsP Cj1473c	Putative ATP/GTP-binding protein	ND	ND	2	2	ND	ND	0.747279	0.928762	0.83802	ND	Q0P8E4	Cj1473c	ND	ND	4	ND	ND	5.10505	5.10505	ND
Q0P8E3	Cj1474c	ctsD Cj1474c	Putative type II protein secretion system D protein	5	5	4	4	1.5751	1.41895	1.39627	2.25722	1.66188	0.0021026	Q0P8E3	Cj1474c	ND	3	3	ND	3.26507	2.87149	3.06828	0.018
Q0P8E2	Cj1475c	ctsR Cj1475c	Putative uncharacterized protein ctsR	1	1	1	1	1.21143	1.02912	0.583824	0.681851	0.876556	0.2945	Q0P8E2	Cj1475c	ND	ND	ND	ND	ND	ND	ND	ND
Q0P8E1	Cj1476c	por Cj1476c	Pyruvate-flavodoxin oxidoreductase (EC 1.2.7.-)	108	108	104	104	1.05491	1.06311	1.11563	1.06097	1.07365	0.0253	Q0P8E1	Cj1476c	112	108	105	0.820211	1.05262	0.986004	0.952946	0.5333
Q0P8E0	Cj1477c	Cj1477c	Putative hydrolase	12	12	13	13	0.825834	0.831498	0.866685	0.80201	0.831507	0.0018587	Q0P8E0	Cj1477c	1	1	1	3.46527	2.8615	2.75448	3.02708	0.008
Q0P8D9	Cj1478c	cadF Cj1478c	Outer membrane fibronectin-binding protein	23	23	22	22	0.548556	0.666323	0.530477	0.680505	0.606465	0.00225	Q0P8D9	Cj1478c	36	34	33	0.69138	0.706106	0.527193	0.64156	0.0033
Q9PMI3	Cj1479c	rpsI Cj1479c	30S ribosomal protein S9	15	15	14	14	0.86436	1.01651	0.905644	0.937497	0.931004	0.24518	Q9PMI3	Cj1479c	22	22	22	0.655472	0.671473	0.726604	0.684516	0.00011
Q0P8D7	Cj1480c	rplM Cj1480c	50S ribosomal protein L13	17	17	19	19	0.875554	0.947271	0.947286	0.993299	0.940853	0.51533	Q0P8D7	Cj1480c	24	24	24	1.0402	0.780329	0.745987	0.855506	0.1948
Q0P8D6	Cj1481c	Cj1481c	DNA helicase (EC 3.6.4.12)	25	25	27	27	1.01635	1.01346	1.02067	1.0515	1.02549	0.07161	Q0P8D6	Cj1481c	37	33	35	1.18712	0.998318	1.30992	1.16512	0.1425
Q0P8D5	Cj1482c	Cj1482c	Putative uncharacterized protein (PDDEXK_1 domain-containing protein)	13	13	14	14	1.07174	1.05248	1.17147	1.16761	1.11582	0.069	Q0P8D5	Cj1482c	23	23	23	0.79005	1.22694	1.16096	1.05932	0.6852
Q0P8D4	Cj1483c	Cj1483c	Putative lipoprotein	11	11	10	10	0.923854	0.955828	0.851069	0.873003	0.900938	0.091301	Q0P8D4	Cj1483c	11	14	10	1.1371	1.13041	0.664949	0.977486	0.8924
Q0P8D3	Cj1484c	Cj1484c	Putative membrane protein	3	3	3	3	1.55465	3.15172	1.18507	1.8785	1.94248	0.01458	Q0P8D3	Cj1484c	3	3	3	2.67067	1.50685	1.82221	1.99991	0.0394
Q0P8D1	Cj1486c	Cj1486c	Putative periplasmic protein	2	2	2	2	0.587401	0.568583	0.507909	0.746081	0.602494	0.00641	Q0P8D1	Cj1486c	2	2	ND	0.397972	0.557591	ND	0.477782	0.0226
Q0P8D0	Cj1487c	ccoP Cj1487c	Cbb3-type cytochrome c oxidase subunit	14	14	12	12	0.796918	0.897385	0.840388	0.651395	0.796522	0.0613	Q0P8D0	Cj1487c	13	14	12	0.548303	1.10162	0.527034	0.725653	0.2184
Q0P8C9	Cj1488c	ccoQ Cj1488c	Cb-type cytochrome C oxidase subunit IV	1	ND	ND	ND	1.27898	ND	ND	ND	1.27898	ND	Q0P8C9	Cj1488c	ND	ND	1	ND	ND	1.26843	1.26843	ND
Q0P8C8	Cj1489c	ccoO Cj1489c	Cb-type cytochrome C oxidase subunit II (EC 1.9.3.1)	15	15	14	14	0.961687	0.927982	1.08228	1.0288	1.00019	0.78646	Q0P8C8	Cj1489c	22	22	22	0.790406	0.950053	0.841312	0.86059	0.1415
Q0P8C7	Cj1490c	ccoN Cj1490c	Cb-type cytochrome C oxidase subunit I (EC 1.9.3.1)	3	3	1	1	1.26056	1.21269	0.611994	0.743515	1.23662	0.63398	Q0P8C7	Cj1490c	ND	1	ND	ND	1.22948	ND	1.22948	ND
Q0P8C6	Cj1491c	Cj1491c	Putative two-component regulator	27	27	25	25	0.989451	1.00458	1.1075	1.04334	1.03622	0.2011	Q0P8C6	Cj1491c	17	17	17	1.26433	1.0872	0.803566	1.0517	0.7196
Q0P8C5	Cj1492c	Cj1492c	Putative two-component sensor	6	6	6	6	0.995447	0.94923	0.965289	0.982791	0.973189	0.48184	Q0P8C5	Cj1492c	13	10	9	1.26201	0.738937	1.16767	1.05621	0.7445
Q9PMG8	Cj1494c	carA Cj1494c	Carbamoyl-phosphate synthase small chain (EC 6.3.5.5) (Carbamoyl-phosphate synthetase glutamine chain)	22	22	25	25	1.09157	0.986276	1.10967	1.02958	1.05427	0.272	Q9PMG8	Cj1494c	25	27	27	1.19488	0.894713	0.762228	0.950606	0.7192
Q0P8C2	Cj1495c	Cj1495c	Putative uncharacterized protein (DUF507 family protein)	20	20	23	23	0.824077	0.630668	0.679175	0.608828	0.685687	0.041826	Q0P8C2	Cj1495c	11	11	11	0.804665	0.748754	0.526838	0.693419	0.0225
Q0P8C1	Cj1496c	Cj1496c	Putative periplasmic protein	20	20	17	17	1.63195	1.33962	1.71884	1.3194	1.50245	0.004942	Q0P8C1	Cj1496c	18	18	18	1.64008	2.72935	1.05975	1.80973	0.1733
Q0P8C0	Cj1497c	fliJ Cj1497c	Flagellar FliJ protein	8	8	4	4	1.53884	1.40245	1.37149	1.32876	1.41038	0.0011709	Q0P8C0	Cj1497c	1	ND	ND	0.964781	ND	ND	0.964781	ND
Q9PMG4	Cj1498c	purA Cj1498c	Adenylosuccinate synthetase (AMPSase) (AdSS) (EC 6.3.4.4) (IMP--aspartate ligase)	46	46	38	38	1.21334	1.22907	1.20358	1.22681	1.2182	0.00050373	Q9PMG4	Cj1498c	40	41	38	0.9931	0.935659	0.931707	0.953489	0.079
Q0P8B8	Cj1500	fdhT Cj1500	Putative integral membrane protein	2	2	ND	ND	1.70997	1.488	ND	ND	1.59899	ND	Q0P8B8	Cj1500	7	7	7	1.59899	2.23446	1.70063	1.84469	0.0128
Q0P8B7	Cj1501	fdhU Cj1501	Putative uncharacterized protein (UPF0033 domain-containing protein)	7	7	5	5	1.22274	0.943566	1.34583	0.968872	1.12025	0.33532	Q0P8B7	Cj1501	ND	3	ND	ND	1.55258	ND	1.55258	ND
Q0P8B6	Cj1502c	putP Cj1502c	Putative sodium/proline symporter (Proline permease)	ND	ND	3	2	ND	ND	1.22342	1.28761	1.25551	0.0154	Q0P8B6	Cj1502c	ND	ND	ND	ND	ND	ND	ND	ND
Q0P8B5	Cj1503c	putA Cj1503c	Putative proline dehydrogenase/delta-1-pyrroline-5-carboxylate dehydrogenase (EC 1.5.1.12) (EC 1.5.99.8)	109	109	104	104	0.706523	0.826865	0.641226	0.569525	0.686035	0.0186	Q0P8B5	Cj1503c	103	100	104	0.735787	0.532606	0.454895	0.574429	0.0071
Q9PMF9	Cj1504c	selD Cj1504c	Selenide, water dikinase (EC 2.7.9.3) (Selenium donor protein) (Selenophosphate synthase)	14	14	12	12	0.896946	0.861533	0.897381	1.05281	0.927167	0.3191	Q9PMF9	Cj1504c	7	7	7	1.43171	1.63423	1.38855	1.48483	0.0031
Q0P8B3	Cj1505c	Cj1505c	Putative two-component response regulator (SirA-like protein)	16	16	14	14	1.17117	1.21347	1.28362	1.11427	1.19563	0.0217	Q0P8B3	Cj1505c	11	11	11	0.868131	0.949207	0.961084	0.926141	0.0647
Q0P8B2	Cj1506c	tlp1 ccaA Cj1506c	Putative MCP-type signal transduction protein	54	53	52	51	0.815209	0.857005	0.775112	0.864342	0.827917	0.017587	Q0P8B2	Cj1506c	62	53	60	0.826352	0.955981	0.746027	0.842787	0.062
Q0P8B1	Cj1507c	modE Cj1507c	Putative regulatory protein	29	29	24	24	0.927799	0.975289	0.95573	0.951912	0.952683	0.38521	Q0P8B1	Cj1507c	33	29	30	1.38631	0.948997	0.834895	1.05674	0.7526
Q0P8B0	Cj1508c	fdhD Cj1508c	Sulfur carrier protein FdhD	27	27	28	28	0.805176	0.858435	0.859193	0.837347	0.840037	0.0029827	Q0P8B0	Cj1508c	23	23	23	1.00856	0.91195	1.05541	0.991972	0.8585
Q0P8A9	Cj1509c	fdhC Cj1509c	Putative formate dehydrogenase, cytochrom B subunit (EC 1.2.1.2)	ND	ND	2	2	ND	ND	0.465702	0.509842	0.487772	0.0019	Q0P8A9	Cj1509c	7	7	7	0.4959	0.657797	0.800945	0.651547	0.0168
Q0P8A8	Cj1510c	fdhB Cj1510c	Putative formate dehydrogenase iron-sulfur subunit (EC 1.2.1.2)	19	19	17	17	0.788191	0.833417	0.837681	0.875687	0.833744	0.0082434	Q0P8A8	Cj1510c	25	22	23	0.753313	1.05166	1.23481	1.01326	0.9292
Q0P8A7	Cj1511c	fdhA Cj1511c	Putative formate dehydrogenase large subunit (Selenocysteine containing) (EC 1.2.1.2)	57	57	54	54	0.841127	0.892248	0.809744	0.922211	0.866333	0.0242	Q0P8A7	Cj1511c	76	77	76	0.800903	0.861782	0.876386	0.846357	0.0027
Q0P8A6	Cj1513c	Cj1513c	Possible periplasmic protein	1	1	3	3	1.18484	1.22643	1.69988	1.29372	1.35122	0.1038	Q0P8A6	Cj1513c	4	4	4	1.96577	1.80708	1.98515	1.91933	9.7e-05
Q0P8A5	Cj1514c	fdhM Cj1514c	Formate dehydrogenase-specific chaperone	12	12	12	12	0.949465	1.28026	1.13031	1.13805	1.12452	0.073922	Q0P8A5	Cj1514c	7	7	7	1.88994	2.04839	1.14057	1.69297	0.0686
Q0P8A4	Cj1515c	Cj1515c	Carboxynorspermidine/carboxyspermidine decarboxylase (CANS DC/CAS DC) (CANSDC/CASDC) (EC 4.1.1.-)	23	23	23	23	1.09626	1.23139	1.2843	1.63119	1.31078	0.0721	Q0P8A4	Cj1515c	18	18	18	1.36102	1.94772	1.66146	1.65674	0.0179
Q0P8A3	Cj1516	cueO Cj1516	Putative periplasmic oxidoreductase	35	35	29	29	0.708331	0.933064	0.654331	0.936517	0.808061	0.1588	Q0P8A3	Cj1516	49	44	44	1.33728	0.938199	0.822567	1.03268	0.8442
Q0P8A2	Cj1517	moaD Cj1517	Putative molybdopterin converting factor, subunit 1	9	9	9	9	0.981925	1.12794	1.05894	1.15429	1.08078	0.14089	Q0P8A2	Cj1517	7	7	7	0.793685	1.22347	1.02457	1.01391	0.9162
Q0P8A1	Cj1518	moaE Cj1518	Molybdopterin synthase catalytic subunit (EC 2.8.1.12) (MPT synthase subunit 2) (Molybdenum cofactor biosynthesis protein E) (Molybdopterin-converting factor large subunit) (Molybdopterin-converting factor subunit 2)	10	10	9	9	1.00784	0.958473	1.07614	1.05994	1.0256	0.18864	Q0P8A1	Cj1518	7	7	7	1.26371	1.17444	0.913731	1.11729	0.3265
Q0P8A0	Cj1519	moeA2 Cj1519	Molybdopterin molybdenumtransferase (EC 2.10.1.1)	30	30	32	32	1.06292	1.00984	1.05448	1.03814	1.04135	0.1042	Q0P8A0	Cj1519	28	32	30	0.918955	0.928885	0.94886	0.932233	0.0015
Q0P898	Cj1522c	cas1 Cj1522c	CRISPR-associated endonuclease Cas1 (EC 3.1.-.-)	1	1	1	1	1.05965	1.04016	1.05576	1.01791	1.04337	ND	Q0P898	Cj1522c	ND	4	9	ND	1.08638	1.35418	1.22028	0.1144
Q0P897	Cj1523c	Cj1523c	CRISPR-associated endonuclease Cas9	43	42	48	48	1.18388	1.12946	1.21456	1.10821	1.15903	0.0122	Q0P897	Cj1523c	72	64	71	1.06831	0.96928	1.00509	1.01423	0.6489
Q0P896	Cj1529c	purM Cj1529c	Phosphoribosylformylglycinamidine cyclo-ligase (EC 6.3.3.1)	24	24	22	22	1.19441	1.09203	1.30682	1.18593	1.1948	0.0418	Q0P896	Cj1529c	11	11	11	0.798973	1.10586	0.865321	0.923383	0.4573
Q9PMD9	Cj1530	coaE Cj1530	Dephospho-CoA kinase (EC 2.7.1.24) (Dephosphocoenzyme A kinase)	6	6	7	7	3.1062	2.66971	1.83505	1.80343	2.3536	0.0046098	Q9PMD9	Cj1530	8	7	8	8.34155	1.73668	2.03151	4.03658	0.02904
Q9PMD8	Cj1531	dapF Cj1531	Diaminopimelate epimerase (DAP epimerase) (EC 5.1.1.7)	16	16	16	16	1.05113	1.08929	1.07505	1.02434	1.05995	0.05586	Q9PMD8	Cj1531	15	15	15	1.0925	1.12513	0.828121	1.01525	0.879
Q0P893	Cj1532	Cj1532	Putative periplasmic protein	17	17	17	17	1.03602	0.963063	0.961518	0.984852	0.986363	0.8992	Q0P893	Cj1532	9	9	9	1.26285	0.955966	0.966988	1.06194	0.5711
Q0P892	Cj1533c	Cj1533c	Putative helix-turn-helix containing protein	2	2	1	1	1.04282	0.96939	0.780058	0.688306	0.870143	0.22162	Q0P892	Cj1533c	ND	4	4	ND	1.45895	1.01479	1.23687	0.2478
Q0P891	Cj1534c	dps Cj1534c	DNA protection during starvation protein (EC 1.16.-.-)	19	19	19	19	0.81207	0.853913	0.932711	0.894939	0.873408	0.034628	Q0P891	Cj1534c	21	21	21	0.941473	0.840998	0.794251	0.858908	0.0314
Q9PMD4	Cj1535c	pgi Cj1535c	Probable glucose-6-phosphate isomerase (GPI) (EC 5.3.1.9) (Phosphoglucose isomerase) (PGI) (Phosphohexose isomerase) (PHI)	22	22	20	20	1.17613	1.04461	1.13426	1.16994	1.13124	0.0447	Q9PMD4	Cj1535c	22	20	19	1.32502	0.946666	1.10076	1.12415	0.3216
Q0P889	Cj1536c	galU Cj1536c	UTP--glucose-1-phosphate uridylyltransferase (EC 2.7.7.9)	15	15	16	16	1.1718	1.08735	1.16525	1.11285	1.13431	0.023102	Q0P889	Cj1536c	7	7	7	1.34984	1.12787	1.37951	1.28574	0.0228
Q9PMD2	Cj1537c	acsA acs Cj1537c	Acetyl-coenzyme A synthetase (AcCoA synthetase) (Acs) (EC 6.2.1.1) (Acetate--CoA ligase) (Acyl-activating enzyme)	42	42	42	42	0.712082	0.637518	0.669899	0.848497	0.716999	0.0153	Q9PMD2	Cj1537c	44	42	42	0.754807	0.700262	0.713544	0.722871	7.3e-06
Q0P887	Cj1538c	tupC Cj1538c	Tungstate uptake system ATP-binding protein TupC (EC 7.3.2.6)	4	4	3	3	0.603899	0.450405	0.955268	0.852091	0.715416	0.1745	Q0P887	Cj1538c	ND	ND	ND	ND	ND	ND	ND	ND
Q0P885	Cj1540	tupA Cj1540	Tungstate-binding protein TupA	36	36	34	34	0.596886	0.659125	0.682129	0.675088	0.653307	0.0029827	Q0P885	Cj1540	34	34	34	1.08909	0.997227	0.831603	0.972641	0.7349
Q9PMC8	Cj1541	Cj1541	5-oxoprolinase subunit A (5-OPase subunit A) (EC 3.5.2.9) (5-oxoprolinase (ATP-hydrolyzing) subunit A)	20	19	21	20	1.1798	0.989736	1.2295	1.06485	1.11597	0.086947	Q9PMC8	Cj1541	19	21	18	0.441886	0.816267	0.476291	0.578148	0.0242
Q0P883	Cj1542	Cj1542	Putative allophanate hydrolase subunit 1	13	13	15	15	1.00664	1.04288	0.98125	1.12306	1.03846	0.13607	Q0P883	Cj1542	11	11	11	0.964832	1.29807	1.75315	1.33868	0.2124
Q0P882	Cj1543	Cj1543	Putative allophanate hydrolase subunit 2	25	25	25	25	0.703285	0.85277	0.954888	0.974725	0.871417	0.2395	Q0P882	Cj1543	20	20	25	0.743104	0.726511	0.593305	0.68764	0.0027
Q0P880	Cj1545c	Cj1545c	MdaB protein homolog	25	25	26	26	1.00456	1.00217	0.893198	0.75384	0.913442	0.3849	Q0P880	Cj1545c	22	25	26	0.751326	0.791711	0.721699	0.754912	0.0003
Q0P879	Cj1546	Cj1546	Putative transcriptional regulator	1	1	1	1	1.16631	1.04485	1.03223	0.861832	1.02631	0.68973	Q0P879	Cj1546	ND	2	ND	ND	1.27267	ND	1.27267	ND
Q0P878	Cj1547	Cj1547	Outer membrane lipoprotein Blc	5	5	4	4	1.48136	1.26667	1.42942	1.15515	1.33315	0.0414	Q0P878	Cj1547	ND	4	5	ND	0.85183	1.18155	1.01669	0.9005
Q0P877	Cj1548c	Cj1548c	Putative NADP-dependent alcohol dehydrogenase (EC 1.1.1.2)	30	30	27	27	1.13224	1.05127	1.17579	1.05186	1.10279	0.054199	Q0P877	Cj1548c	24	24	24	1.23146	0.854371	0.853504	0.979777	0.8801
Q0P876	Cj1549c	hsdR Cj1549c	Type I restriction enzyme endonuclease subunit (R protein) (EC 3.1.21.3)	21	21	14	14	1.05261	1.08161	0.986412	1.03726	1.03947	0.21122	Q0P876	Cj1549c	21	24	25	0.969752	1.30908	1.351	1.20994	0.157
Q0P875	Cj1550c	rloH Cj1550c	Putative ATP/GTP-binding protein	11	11	13	13	0.783874	0.763137	0.730692	0.706314	0.746004	0.0032402	Q0P875	Cj1550c	24	21	23	1.00596	0.838142	0.933965	0.926022	0.2027
Q0P874	Cj1551c	hsdS Cj1551c	Putative type I restriction enzyme S protein	7	7	2	2	0.910041	1.17068	1.18302	1.26698	1.13268	0.316	Q0P874	Cj1551c	7	7	7	1.17225	1.12533	1.29035	1.19598	0.0162
Q0P873	Cj1552c	mloB Cj1552c	Putative uncharacterized protein mloB (Transcriptional regulator)	13	13	15	15	0.787485	0.746197	0.810324	0.904585	0.812148	0.0202	Q0P873	Cj1552c	21	20	21	1.05632	0.943279	1.34061	1.1134	0.3917
Q0P872	Cj1553c	hsdM Cj1553c	Site-specific DNA-methyltransferase (adenine-specific) (EC 2.1.1.72)	13	13	15	15	1.16742	0.96017	0.919931	1.04729	1.0237	0.66765	Q0P872	Cj1553c	24	21	23	1.05649	0.839224	0.81796	0.904557	0.2787
Q0P871	Cj1555c	Cj1555c	Putative uncharacterized protein (NAD(P)-bd_dom domain-containing protein)	15	15	10	10	1.19258	0.94513	1.1946	1.10493	1.10931	0.2814	Q0P871	Cj1555c	11	11	11	1.40501	1.28029	0.916422	1.20057	0.243
Q0P870	Cj1556	Cj1556	Putative transcriptional regulator	7	7	5	5	1.23868	1.03075	0.995855	0.996704	1.0655	0.31355	Q0P870	Cj1556	ND	3	3	ND	0.732439	1.33673	1.03458	0.8877
Q0P865	Cj1563c	Cj1563c	Putative transcriptional regulator	5	5	4	4	1.11981	1.03883	1.17786	0.946585	1.07077	0.427	Q0P865	Cj1563c	ND	8	8	ND	1.08638	0.729625	0.908002	0.5387
Q0P864	Cj1564	tlp3 ccmL Cj1564	Putative methyl-accepting chemotaxis signal transduction protein	57	30	58	31	0.768745	0.801425	0.80515	0.669625	0.761236	0.030776	Q0P864	Cj1564	73	58	36	0.663063	0.825581	0.711716	0.733453	0.0052
Q0P863	Cj1565c	pflA Cj1565c	Paralysed flagellum protein	28	28	28	28	1.10445	1.02398	1.03642	1.0129	1.04444	0.19377	Q0P863	Cj1565c	44	41	39	1.49391	1.21763	1.1009	1.27081	0.0808
Q0P861	Cj1567c	nuoM Cj1567c	NADH dehydrogenase I chain M (EC 1.6.5.3)	2	2	3	3	0.534963	0.729288	0.637294	0.651965	0.638377	0.0038	Q0P861	Cj1567c	ND	3	3	ND	0.626595	0.814718	0.720656	0.2832
Q9PMA7	Cj1568c	nuoL Cj1568c	NADH-quinone oxidoreductase subunit L	ND	ND	2	2	ND	ND	0.875821	1.02653	0.951177	ND	Q9PMA7	Cj1568c	3	2	3	3.18422	1.47588	2.50167	2.38726	0.0292
Q0P857	Cj1571c	nuoI Cj1571c	NADH-quinone oxidoreductase subunit I (EC 1.6.99.5) (NADH dehydrogenase I subunit I) (NDH-1 subunit I)	19	19	18	18	0.926836	1.00071	0.883359	1.02699	0.959472	0.28665	Q0P857	Cj1571c	32	31	32	0.896098	0.910489	0.850984	0.885857	0.0031
Q0P855	Cj1573c	nuoG Cj1573c	Putative NADH dehydrogenase I chain G (EC 1.6.5.3)	55	55	49	49	0.955451	1.05259	0.938042	1.05639	1.00062	0.75653	Q0P855	Cj1573c	63	65	61	0.950906	0.951354	0.854045	0.918768	0.0661
Q0P854	Cj1574c	Cj1574c	NADH dehydrogenase I subunit F	19	19	18	18	1.07684	1.04164	0.845998	0.735064	0.924885	0.5705	Q0P854	Cj1574c	12	12	12	0.756482	0.647764	0.376768	0.593671	0.0228
Q0P853	Cj1575c	Cj1575c	NADH-ubiquinone oxidoreductase chain E	8	8	8	8	0.974339	1.04559	1.06829	0.932319	1.00513	0.77147	Q0P853	Cj1575c	5	5	5	0.940428	1.14335	1.01347	1.03241	0.6139
Q9PM99	Cj1576c	nuoD Cj1576c	NADH-quinone oxidoreductase subunit D (EC 1.6.99.5) (NADH dehydrogenase I subunit D) (NDH-1 subunit D)	11	11	11	11	0.76004	0.769097	0.78244	0.79828	0.777464	0.0039717	Q9PM99	Cj1576c	23	22	23	1.07686	1.09485	0.768343	0.980017	0.8596
Q0P851	Cj1577c	nuoC Cj1577c	NADH-quinone oxidoreductase (EC 1.6.99.5)	19	19	16	16	0.801421	0.808482	0.776547	0.725506	0.777989	0.0014	Q0P851	Cj1577c	27	29	26	0.645182	0.668086	0.757378	0.690215	0.0008
Q0P850	Cj1578c	nuoB Cj1578c	NADH-quinone oxidoreductase subunit B (EC 1.6.99.5) (NADH dehydrogenase I subunit B) (NDH-1 subunit B)	10	10	5	5	0.854863	0.847928	0.991811	1.06905	0.940912	0.28609	Q0P850	Cj1578c	11	10	11	0.819871	0.843284	1.09993	0.921028	0.4284
Q0P849	Cj1579c	nuoA Cj1579c	NADH-quinone oxidoreductase subunit	ND	ND	3	3	ND	ND	0.765475	1.04804	0.906757	ND	Q0P849	Cj1579c	3	3	3	0.674719	0.760381	0.96907	0.80139	0.0855
Q0P848	Cj1580c	Cj1580c	Putative peptide ABC-transport system ATP-binding protein	ND	ND	ND	ND	ND	ND	ND	ND	ND	ND	Q0P848	Cj1580c	ND	ND	2	ND	ND	2.11857	2.11857	ND
Q0P844	Cj1584c	nikZ Cj1584c	Putative peptide ABC-transport system periplasmic peptide-binding protein	12	12	12	12	2.14465	2.06031	1.56286	1.6644	1.85805	0.0051403	Q0P844	Cj1584c	24	18	21	1.93147	1.42287	1.58766	1.64733	0.0442
Q0P843	Cj1585c	Cj1585c	Putative oxidoreductase	37	37	37	37	1.13309	1.10167	1.06846	1.09792	1.10029	0.0051403	Q0P843	Cj1585c	37	37	37	0.795225	0.923257	0.833202	0.850561	0.017
Q0P842	Cj1586	cgb Cj1586	Single domain haemoglobin	14	14	16	16	0.756191	0.764178	0.755443	0.764918	0.760183	0.00057228	Q0P842	Cj1586	10	10	10	1.09776	0.878926	0.737473	0.90472	0.4147
Q0P841	Cj1587c	Cj1587c	Putative ABC transporter	ND	ND	6	6	ND	ND	1.43277	2.61194	2.02235	ND	Q0P841	Cj1587c	6	5	6	1.19759	1.46488	2.31574	1.6594	0.1896
Q9PM85	Cj1590	infA Cj1590	Translation initiation factor IF-1	9	9	6	6	1.32728	1.22274	1.4797	1.27748	1.3268	0.0169	Q9PM85	Cj1590	8	9	8	1.51751	1.19855	1.22835	1.3148	0.0364
Q9PM84	Cj1591	rpmJ Cj1591	50S ribosomal protein L36	6	6	6	6	0.478864	0.708692	0.536069	0.572599	0.574056	0.00449	Q9PM84	Cj1591	ND	5	7	ND	0.712963	0.371266	0.542115	0.1156
Q9PM83	Cj1592	rpsM Cj1592	30S ribosomal protein S13	18	18	14	14	0.991352	1.02947	0.908783	0.988798	0.9796	0.83194	Q9PM83	Cj1592	24	24	24	0.946116	0.740906	0.648203	0.778409	0.0655
Q9PM82	Cj1593	rpsK Cj1593	30S ribosomal protein S11	11	11	10	10	0.776704	0.78697	0.717121	0.78783	0.767156	0.0081	Q9PM82	Cj1593	11	16	16	0.734245	0.533452	0.508185	0.591961	0.0047
Q9PM81	Cj1594	rpsD Cj1594	30S ribosomal protein S4	30	30	29	29	0.927489	0.944852	0.948487	1.00663	0.956865	0.45178	Q9PM81	Cj1594	45	40	44	0.941868	0.876157	0.767155	0.861727	0.0533
Q9PM80	Cj1595	rpoA Cj1595	DNA-directed RNA polymerase subunit alpha (RNAP subunit alpha) (EC 2.7.7.6) (RNA polymerase subunit alpha) (Transcriptase subunit alpha)	38	38	36	36	1.06158	1.10624	1.01811	1.11026	1.07405	0.0849	Q9PM80	Cj1595	42	36	38	0.755967	0.847597	0.690111	0.764558	0.0067
Q0P832	Cj1596	rplQ Cj1596	50S ribosomal protein L17	12	12	13	13	0.944158	0.951881	1.0125	1.06116	0.992426	0.98128	Q0P832	Cj1596	17	15	17	3.0068	1.52976	1.87066	2.13574	0.0048
Q9PM78	Cj1597	hisG Cj1597	ATP phosphoribosyltransferase (ATP-PRT) (ATP-PRTase) (EC 2.4.2.17)	31	31	31	31	1.00271	1.02841	0.967184	1.08989	1.02205	0.22902	Q9PM78	Cj1597	35	31	31	0.997544	0.98223	1.06309	1.01429	0.5954
Q9PM77	Cj1598	hisD Cj1598	Histidinol dehydrogenase (HDH) (EC 1.1.1.23)	52	52	50	50	1.03774	0.979066	1.14793	0.996996	1.04043	0.38922	Q9PM77	Cj1598	36	36	36	1.52744	1.03107	0.929731	1.16274	0.428
Q9PM76	Cj1599	hisB Cj1599	Histidine biosynthesis bifunctional protein HisB [Includes: Histidinol-phosphatase (EC 3.1.3.15); Imidazoleglycerol-phosphate dehydratase (IGPD) (EC 4.2.1.19)]	16	16	21	21	0.935533	0.99511	0.919033	0.95584	0.951379	0.26253	Q9PM76	Cj1599	22	22	21	1.05068	0.790852	1.50806	1.11653	0.6079
Q9PM75	Cj1600	hisH2 Cj1600	Imidazole glycerol phosphate synthase subunit HisH 2 (EC 2.4.2.-) (IGP synthase glutamine amidotransferase subunit 2) (IGP synthase subunit HisH 2) (ImGP synthase subunit HisH 2) (IGPS subunit HisH 2)	16	16	15	15	0.920553	1.02164	1.05335	1.09909	1.02366	0.24426	Q9PM75	Cj1600	10	10	10	1.56297	1.90744	1.80141	1.75727	0.0017
Q9PM74	Cj1601	hisA Cj1601	1-(5-phosphoribosyl)-5-[(5-phosphoribosylamino)methylideneamino] imidazole-4-carboxamide isomerase (EC 5.3.1.16) (Phosphoribosylformimino-5-aminoimidazole carboxamide ribotide isomerase)	25	25	24	24	1.06283	1.00607	1.05922	1.05514	1.04582	0.064264	Q9PM74	Cj1601	17	17	17	0.829708	0.748527	0.751072	0.776436	0.0011
Q0P826	Cj1602	Cj1602	Putative uncharacterized protein (HTH HARE-type domain-containing protein)	24	24	23	23	0.973006	0.929364	0.971504	0.944212	0.954521	0.37818	Q0P826	Cj1602	25	23	24	1.29457	0.828896	0.863685	0.995718	0.9786
Q9PM72	Cj1603	hisF1 hisF Cj1603	Imidazole glycerol phosphate synthase subunit hisF1 (EC 4.1.3.-) (IGP synthase cyclase subunit) (IGP synthase subunit hisF1) (ImGP synthase subunit hisF1) (IGPS subunit hisF1)	19	19	22	22	1.00951	0.960439	1.04981	0.914979	0.983685	0.86662	Q9PM72	Cj1603	18	15	17	1.26793	1.0432	0.794031	1.03505	0.8105
Q9PM71	Cj1604	hisI hisIE Cj1604	Histidine biosynthesis bifunctional protein HisIE [Includes: Phosphoribosyl-AMP cyclohydrolase (PRA-CH) (EC 3.5.4.19); Phosphoribosyl-ATP pyrophosphatase (PRA-PH) (EC 3.6.1.31)]	11	11	10	10	1.27517	1.05834	1.33613	1.01773	1.17184	0.11259	Q9PM71	Cj1604	11	11	10	1.96673	0.642683	0.697833	1.10242	0.8244
Q0P823	Cj1605c	dapD Cj1605c	2,3,4,5-tetrahydropyridine-2,6-dicarboxylate N-succinyltransferase (EC 2.3.1.117) (Tetrahydrodipicolinate N-succinyltransferase) (THDP succinyltransferase) (THP succinyltransferase) (Tetrahydropicolinate succinylase)	28	28	25	25	1.15635	1.10103	1.16234	1.15105	1.14269	0.0070324	Q0P823	Cj1605c	20	21	21	1.25656	1.16142	0.893595	1.10386	0.3933
Q0P822	Cj1606c	mrp Cj1606c	Iron-sulfur cluster carrier protein	34	34	29	29	0.708099	0.830252	0.564766	0.57559	0.669677	0.0246	Q0P822	Cj1606c	31	34	30	0.614677	0.670626	0.70113	0.662144	0.0002
Q9PM68	Cj1607	ispDF Cj1607	Bifunctional enzyme IspD/IspF [Includes: 2-C-methyl-D-erythritol 4-phosphate cytidylyltransferase (EC 2.7.7.60) (4-diphosphocytidyl-2C-methyl-D-erythritol synthase) (MEP cytidylyltransferase) (MCT); 2-C-methyl-D-erythritol 2,4-cyclodiphosphate synthase (MECDP-synthase) (MECPP-synthase) (MECPS) (EC 4.6.1.12)]	26	26	25	25	1.19066	1.18665	1.22629	1.21476	1.20459	0.0029827	Q9PM68	Cj1607	25	26	24	1.41748	0.974021	1.44727	1.27959	0.1417
Q0P820	Cj1608	Cj1608	Putative two-component regulator	12	12	14	14	0.766589	0.79955	0.886976	0.92451	0.844406	0.0481	Q0P820	Cj1608	22	22	22	1.1321	0.624055	1.15059	0.968915	0.8658
Q0P819	Cj1609	Cj1609	Putative sulfate adenylyltransferase (EC 2.7.7.4)	23	23	24	24	0.852804	0.853106	0.873314	0.848858	0.857021	0.030141	Q0P819	Cj1609	25	24	25	1.02724	1.09654	1.17163	1.09847	0.0775
Q9PM64	Cj1611	rpsT Cj1611	30S ribosomal protein S20	8	8	10	10	1.03093	0.959893	0.870849	0.862699	0.931093	0.29696	Q9PM64	Cj1611	13	10	12	1.27047	0.689454	0.626595	0.862171	0.5381
Q9PM63	Cj1612	prfA Cj1612	Peptide chain release factor 1 (RF-1)	34	33	35	34	1.26952	1.23191	1.37392	1.3644	1.30994	0.0034411	Q9PM63	Cj1612	21	18	20	1.75882	1.49084	0.957674	1.40245	0.1626
Q0P815	Cj1613c	chuZ Cj1613c	Putative pyridoxamine 5'-phosphate oxidase	18	18	17	17	2.07699	1.70756	1.72003	2.32423	1.9572	0.0020933	Q0P815	Cj1613c	28	24	25	2.74428	2.40392	3.01192	2.72004	0.0048
Q0P814	Cj1614	chuA Cj1614	Haemin uptake system outer membrane receptor	ND	ND	30	30	ND	ND	2.21301	1.97091	2.09196	0.0121	Q0P814	Cj1614	ND	30	30	ND	3.65034	1.81546	2.7329	0.0358
Q0P812	Cj1616	chuC Cj1616	Putative haemin uptake system ATP-binding protein	ND	ND	10	10	ND	ND	1.4067	2.01834	1.71252	ND	Q0P812	Cj1616	ND	10	10	ND	1.5902	1.93419	1.76219	0.0473
Q0P811	Cj1617	chuD Cj1617	Putative haemin uptake system periplasmic haemin-binding protein	3	3	2	2	2.20028	1.6895	1.84635	4.74455	2.62017	0.00167	Q0P811	Cj1617	ND	19	19	ND	2.38783	4.12529	3.25656	0.04012
Q0P810	Cj1618c	Cj1618c	Putative radical SAM domain protein	6	6	4	4	1.69802	1.67236	1.64261	1.57122	1.64605	0.0006479	Q0P810	Cj1618c	4	3	ND	1.3767	4.13976	ND	2.75823	0.1863
Q0P809	Cj1619	kgtP Cj1619	Alpha-ketoglutarate permease	4	4	3	3	0.624642	0.709881	0.733577	0.570708	0.659702	0.010372	Q0P809	Cj1619	8	4	3	0.739067	0.767916	0.489878	0.66562	0.0193
Q0P808	Cj1620c	mutY Cj1620c	A/G-specific adenine glycosylase (EC 3.2.2.-)	1	6	8	8	0.869937	1.396	1.40149	2.08412	1.6272	ND	Q0P808	Cj1620c	8	8	8	2.25269	1.27521	2.37	1.96597	0.0496
Q0P807	Cj1621	Cj1621	Putative periplasmic protein	17	17	13	13	0.863511	0.851463	0.85655	0.845696	0.854305	0.0064247	Q0P807	Cj1621	26	21	26	0.641354	1.0432	1.04888	0.911145	0.5461
Q0P806	Cj1622	ribD Cj1622	Riboflavin-specific deaminase/reductase (EC 3.5.4.-)	3	3	6	6	1.03072	1.08997	1.1052	1.41634	1.16056	0.47477	Q0P806	Cj1622	ND	5	5	ND	1.6283	2.23179	1.93004	0.0257
Q0P804	Cj1624c	sdaA Cj1624c	L-serine dehydratase (EC 4.3.1.17)	45	45	39	39	0.627778	0.843829	0.525666	0.488893	0.621541	0.0341	Q0P804	Cj1624c	40	39	45	0.440471	0.541073	0.441877	0.474474	2.7e-06
Q0P803	Cj1625c	sdaC Cj1625c	Amino acid transporter (Serine transporter SdaC)	2	2	4	4	1.4245	1.32812	1.53529	1.77017	1.51452	0.0124	Q0P803	Cj1625c	4	2	4	2.84609	1.11517	1.55892	1.84006	0.03575
Q0P802	Cj1626c	Cj1626c	Putative periplasmic protein	13	13	11	11	1.29844	1.07471	1.33665	1.13978	1.21239	0.0866	Q0P802	Cj1626c	12	11	13	0.853188	1.18799	1.03924	1.02681	0.7957
Q0P801	Cj1627c	Cj1627c	Putative uncharacterized protein (DUF4261 domain-containing protein)	3	3	4	4	1.20577	1.23821	2.36669	2.49997	1.82766	0.0995	Q0P801	Cj1627c	3	3	3	2.42329	1.27128	1.78419	1.82625	0.1505
Q0P7Z9	Cj1629	exbD2 Cj1629	Biopolymer transport protein ExbD	ND	ND	3	3	ND	ND	3.36426	5.02029	4.19228	0.0612	Q0P7Z9	Cj1629	ND	3	3	ND	4.33621	3.12227	3.72924	0.0461
Q0P7Z8	Cj1630	tonB2 Cj1630	Protein TonB	ND	ND	ND	ND	ND	ND	ND	ND	ND	ND	Q0P7Z8	Cj1630	ND	ND	1	ND	ND	1.52923	1.52923	ND
Q0P7Z7	Cj1631c	fliK Cj1631c	Flagellar hook-length control protein FliK	6	6	7	7	1.21359	1.13169	1.33514	1.2986	1.24475	0.036521	Q0P7Z7	Cj1631c	ND	ND	ND	ND	ND	ND	ND	ND
Q0P7Z6	Cj1632c	Cj1632c	Putative periplasmic protein	1	1	1	1	0.583188	0.761876	0.531007	0.743159	0.654807	0.0161	Q0P7Z6	Cj1632c	ND	ND	ND	ND	ND	ND	ND	ND
Q0P7Z5	Cj1633	Cj1633	Putative ATP-binding protein	28	28	31	31	1.34128	1.42322	1.43009	1.76754	1.49053	0.0139	Q0P7Z5	Cj1633	23	28	25	1.22961	2.49706	1.43395	1.72021	0.1407
Q9PM41	Cj1634c	aroC Cj1634c	Chorismate synthase (EC 4.2.3.5) (5-enolpyruvylshikimate-3-phosphate phospholyase)	11	11	7	7	1.10837	1.38676	1.17297	1.77888	1.36175	0.0966	Q9PM41	Cj1634c	19	18	18	1.79813	1.39798	1.48941	1.56184	0.0097
Q9PM40	Cj1635c	rnc Cj1635c	Ribonuclease 3 (EC 3.1.26.3) (Ribonuclease III) (RNase III)	21	21	19	19	1.29309	1.23182	1.21732	1.07744	1.20492	0.04	Q9PM40	Cj1635c	14	14	14	1.14725	0.983077	1.36958	1.16663	0.211
Q9PM39	Cj1636c	rnhA Cj1636c	Ribonuclease HI (RNase HI) (EC 3.1.26.4)	ND	ND	1	1	ND	ND	1.22555	1.82192	1.52374	ND	Q9PM39	Cj1636c	ND	ND	2	ND	ND	3.4649	3.4649	ND
Q0P7Z1	Cj1637c	Cj1637c	Putative periplasmic protein	4	4	3	3	1.02521	1.20803	1.3007	1.01752	1.13786	0.2588	Q0P7Z1	Cj1637c	5	5	3	2.52594	1.71467	0.873885	1.70483	0.2135
Q9PM37	Cj1638	dnaG Cj1638	DNA primase (EC 2.7.7.-)	19	19	18	18	1.17722	1.16711	1.24329	1.53057	1.27955	0.0944	Q9PM37	Cj1638	19	19	18	1.34924	2.00001	1.80338	1.71754	0.0204
Q0P7Y9	Cj1639	Cj1639	NifU protein homolog	10	10	10	10	1.2363	1.02834	1.23904	1.05598	1.13992	0.1754	Q0P7Y9	Cj1639	7	7	7	1.13906	1.03294	1.0064	1.05946	0.2162
Q0P7Y8	Cj1640	Cj1640	Putative uncharacterized protein	3	3	1	1	1.44259	1.29513	0.960846	1.1919	1.36886	0.1154	Q0P7Y8	Cj1640	ND	ND	ND	ND	ND	ND	ND	ND
O69290	Cj1641	murE Cj1641	UDP-N-acetylmuramoyl-L-alanyl-D-glutamate--2,6-diaminopimelate ligase (EC 6.3.2.13) (Meso-A2pm-adding enzyme) (Meso-diaminopimelate-adding enzyme) (UDP-MurNAc-L-Ala-D-Glu:meso-diaminopimelate ligase) (UDP-MurNAc-tripeptide synthetase) (UDP-N-acetylmuramyl-tripeptide synthetase)	34	34	30	30	1.69567	1.73557	1.17176	1.48213	1.52128	0.0273	O69290	Cj1641	34	31	30	2.59383	2.02822	1.54035	2.05413	0.0257
Q9PM34	Cj1642	Cj1642	Nucleoid-associated protein Cj1642	9	9	7	7	1.21274	1.32518	1.35022	1.57219	1.36508	0.0318	Q9PM34	Cj1642	5	7	5	2.14208	1.40984	2.06226	1.87139	0.0198
Q0P7Y5	Cj1643	Cj1643	Putative periplasmic protein	18	18	14	14	1.34271	1.08571	1.30621	1.11152	1.21154	0.0988	Q0P7Y5	Cj1643	24	21	23	0.990329	0.8857	0.935869	0.937299	0.1066
Q0P7Y4	Cj1644	ispA Cj1644	Geranyltranstransferase (EC 2.5.1.10)	9	9	8	8	1.0029	1.06855	1.19108	1.02764	1.07254	0.18116	Q0P7Y4	Cj1644	5	5	5	1.68556	0.743446	0.803185	1.0774	0.8119
Q0P7Y3	Cj1645	tkt Cj1645	Transketolase (EC 2.2.1.1)	50	50	51	51	1.16447	1.05903	1.20495	1.09437	1.13071	0.018343	Q0P7Y3	Cj1645	44	44	44	0.978542	1.14894	0.805259	0.977582	0.8323
Q0P7Y2	Cj1646	iamB Cj1646	Putative ABC transport system permease	ND	ND	1	1	ND	ND	0.855402	0.810655	0.833029	ND	Q0P7Y2	Cj1646	3	2	3	4.22347	3.69072	1.80018	3.23812	0.0382
Q0P7Y1	Cj1647	iamA Cj1647	Putative ABC transport system ATP-binding protein	6	6	5	5	1.00346	1.06036	1.84264	0.927771	1.20856	0.66342	Q0P7Y1	Cj1647	5	7	7	1.17595	1.91354	1.67624	1.58858	0.0537
Q0P7Y0	Cj1648	Cj1648	Putative ABC transport system periplasmic substrate-binding protein	1	4	4	4	0.847765	2.48911	1.42321	1.35842	1.52963	ND	Q0P7Y0	Cj1648	11	11	11	3.02285	1.53008	1.74304	2.09866	0.00584
Q0P7X9	Cj1649	Cj1649	Putative lipoprotein	1	1	1	1	0.82408	0.9312	0.642659	0.831831	0.807442	0.0995	Q0P7X9	Cj1649	ND	3	3	ND	0.989851	0.513777	0.751814	0.2563
Q0P7X8	Cj1650	Cj1650	Putative uncharacterized protein	5	5	4	4	1.16675	0.912069	1.67523	1.31035	1.2661	0.12359	Q0P7X8	Cj1650	ND	1	ND	ND	0.293912	ND	0.293912	ND
Q0P7X7	Cj1651c	map Cj1651c	Methionine aminopeptidase (EC 3.4.11.18)	18	18	21	21	0.967357	0.83064	0.797236	0.790625	0.846464	0.0681	Q0P7X7	Cj1651c	15	15	15	1.09489	1.21438	1.12872	1.146	0.0148
Q9PM24	Cj1652c	murI Cj1652c	Glutamate racemase (EC 5.1.1.3)	19	19	15	15	1.19145	1.17747	1.35441	1.33763	1.26524	0.0195	Q9PM24	Cj1652c	14	15	15	1.26742	1.27295	1.08638	1.20891	0.0271
Q0P7X5	Cj1653c	Cj1653c	Putative lipoprotein	2	2	3	3	0.8866	1.14575	1.14076	1.00201	1.04378	0.4145	Q0P7X5	Cj1653c	10	10	10	1.19472	0.981383	1.16179	1.11263	0.1646
Q0P7X1	Cj1658	Cj1658	Putative iron permease	11	11	11	11	1.55339	2.54077	1.45962	1.81333	1.84178	0.0412	Q0P7X1	Cj1658	40	34	33	1.47248	2.08131	2.21091	1.92157	0.0318
Q0P7X0	Cj1659	p19 Cj1659	Periplasmic protein p19	16	16	13	13	1.68821	1.62195	2.12718	1.94627	1.8459	0.0011709	Q0P7X0	Cj1659	13	16	19	2.01041	2.93907	3.37224	2.77391	0.0418
Q0P7W9	Cj1660	Cj1660	Putative integral membrane protein	1	1	7	7	1.23371	3.22971	2.10093	2.87353	2.35947	0.05126	Q0P7W9	Cj1660	7	7	7	1.98792	2.37513	4.12112	2.82806	0.01083
Q0P7W8	Cj1661	Cj1661	Possible ABC transport system permease	5	5	5	5	1.24777	3.53523	2.14263	3.72204	2.66192	0.04567	Q0P7W8	Cj1661	16	15	11	4.83808	2.27183	3.12487	3.41159	0.04167
Q0P7W7	Cj1662	Cj1662	Putative integral membrane protein	ND	ND	4	3	ND	ND	1.87589	2.37854	2.12721	0.0463	Q0P7W7	Cj1662	ND	8	11	ND	2.35227	4.48427	3.41827	0.0316
Q0P7W6	Cj1663	Cj1663	Putative ABC transport system ATP-binding protein	7	7	5	5	1.19756	1.23159	1.36934	3.27786	1.76909	ND	Q0P7W6	Cj1663	ND	11	11	ND	1.78834	3.49887	2.6436	0.1946
Q0P7W5	Cj1664	Cj1664	Putative periplasmic thioredoxin	3	3	2	2	1.18018	1.36387	2.40416	5.14006	2.52207	0.01942	Q0P7W5	Cj1664	8	8	8	2.71055	3.56482	3.16491	3.14676	0.006731
Q0P7W4	Cj1665	Cj1665	Putative lipoprotein thioredoxin	3	3	3	3	1.153	2.15185	1.58134	3.44252	2.08218	0.1179	Q0P7W4	Cj1665	7	7	7	2.11895	1.98478	3.17252	2.42542	0.0405
Q0P7W3	Cj1666c	Cj1666c	Putative periplasmic protein	6	6	8	8	1.16582	1.09869	1.0038	1.04502	1.07833	0.42435	Q0P7W3	Cj1666c	4	4	4	1.87147	0.523967	0.867072	1.0875	0.8392
Q0P7W1	Cj1668c	Cj1668c	Putative periplasmic protein	6	6	7	7	0.679995	1.06502	0.868497	1.19606	0.952394	0.59111	Q0P7W1	Cj1668c	9	9	9	1.30133	1.04121	1.24134	1.19462	0.0686
Q0P7W0	Cj1669c	Cj1669c	Putative ATP-dependent DNA ligase (EC 6.5.1.1)	4	4	3	3	1.47645	1.22193	1.28079	1.17782	1.28925	0.0429	Q0P7W0	Cj1669c	ND	ND	ND	ND	ND	ND	ND	ND
Q0P7V9	Cj1670c	cgpA Cj1670c	Putative periplasmic protein	21	21	17	17	1.64345	1.56094	1.39644	2.31479	1.72891	0.0057179	Q0P7V9	Cj1670c	16	17	17	2.54578	1.8907	1.44832	1.9616	0.0469
Q0P7V8	Cj1671c	Cj1671c	Putative uncharacterized protein	ND	ND	1	1	ND	ND	0.637772	0.821959	0.729865	ND	Q0P7V8	Cj1671c	ND	ND	3	ND	ND	0.718044	0.718044	ND
P42448	Cj1672c	eno Cj1672c	Enolase (EC 4.2.1.11) (2-phospho-D-glycerate hydro-lyase) (2-phosphoglycerate dehydratase)	29	29	32	32	0.801883	0.934202	0.869842	0.992966	0.899723	0.1639	P42448	Cj1672c	32	32	32	1.07515	0.785784	0.851187	0.90404	0.3349
Q0P7V6	Cj1673c	recA Cj1673c	Protein RecA (Recombinase A)	33	33	26	26	1.0204	1.11947	1.0947	1.09002	1.08115	0.0636	Q0P7V6	Cj1673c	42	40	39	0.900412	1.19468	0.84675	0.980613	0.8664
Q0P7V5	Cj1674	Cj1674	1,4-dihydroxy-6-naphtoate synthase (EC 4.1.-.-) (Menaquinone biosynthetic enzyme MqnD)	16	16	16	16	0.95738	1.00587	1.03238	1.07039	1.01651	0.24668	Q0P7V5	Cj1674	12	12	12	1.17679	1.29976	1.05103	1.17586	0.0705
Q9PM01	Cj1676	murB Cj1676	UDP-N-acetylenolpyruvoylglucosamine reductase (EC 1.3.1.98) (UDP-N-acetylmuramate dehydrogenase)	8	8	10	10	0.815625	0.817565	0.991535	0.876889	0.875404	0.060779	Q9PM01	Cj1676	8	8	8	0.938859	0.941586	1.14689	1.00911	0.9012
Q0P7V1	Cj1679	Cj1679	Putative uncharacterized protein (TPR_REGION domain-containing protein)	9	9	12	12	0.997301	1.09833	0.881275	0.80938	0.946572	0.41199	Q0P7V1	Cj1679	17	15	14	1.14211	0.913068	1.07398	1.04305	0.5605
Q0P7V0	Cj1680c	Cj1680c	Putative periplasmic protein	14	14	16	15	1.15631	1.14588	1.12782	1.39438	1.2061	0.0948	Q0P7V0	Cj1680c	19	16	14	1.54409	1.61052	1.56204	1.57222	1.4e-05
Q0P7U9	Cj1681c	cysQ Cj1681c	CysQ protein homolog	27	27	23	23	1.40574	1.19714	1.30662	1.29536	1.30121	0.0089024	Q0P7U9	Cj1681c	19	19	19	1.08668	0.859451	1.15836	1.03483	0.7187
Q0P7U8	Cj1682c	gltA Cj1682c	Citrate synthase	41	41	40	40	0.963417	0.931173	0.875821	0.681828	0.86306	0.45375	Q0P7U8	Cj1682c	42	42	40	0.623732	0.617281	0.692542	0.644519	0.00017
Q0P7U6	Cj1685c	bioB Cj1685c	Biotin synthase (EC 2.8.1.6)	25	25	24	24	0.87813	0.823915	0.921526	0.874734	0.874576	0.014225	Q0P7U6	Cj1685c	17	17	17	0.788643	0.859451	1.03061	0.892902	0.2102
Q9PLZ2	Cj1686c	topA Cj1686c	DNA topoisomerase 1 (EC 5.99.1.2) (DNA topoisomerase I) (Omega-protein) (Relaxing enzyme) (Swivelase) (Untwisting enzyme)	74	74	71	71	1.16958	0.939057	1.25205	0.944366	1.07627	0.29494	Q9PLZ2	Cj1686c	86	81	84	1.11405	1.05674	0.869854	1.01355	0.8631
Q0P7U3	Cj1688c	secY Cj1688c	Protein translocase subunit SecY	2	2	2	2	0.527044	0.596676	0.711605	0.266486	0.525453	0.0285	Q0P7U3	Cj1688c	ND	2	4	ND	0.644377	0.286641	0.465509	0.02961
Q0P7U2	Cj1689c	rp10 Cj1689c	50S ribosomal protein L15	15	15	14	14	0.485199	0.691762	0.615434	0.699288	0.622921	0.00721	Q0P7U2	Cj1689c	24	24	24	0.91054	0.893231	0.691472	0.831748	0.0749
Q9PLY8	Cj1690c	rpsE Cj1690c	30S ribosomal protein S5	23	23	22	22	0.944046	1.05187	1.00284	1.0279	1.00666	0.7699	Q9PLY8	Cj1690c	23	22	29	1.66203	1.03744	0.686714	1.12873	0.6751
Q9PLY7	Cj1691c	rplR Cj1691c	50S ribosomal protein L18	19	19	15	15	0.723981	0.827473	0.756053	0.786675	0.773546	0.021353	Q9PLY7	Cj1691c	19	22	22	0.853072	0.635062	0.495848	0.661327	0.0311
Q0P7T9	Cj1692c	rplF Cj1692c	50S ribosomal protein L6	19	19	21	21	0.881158	0.801218	1.11088	0.925275	0.929633	0.50472	Q0P7T9	Cj1692c	21	21	23	0.812694	1.07003	0.668086	0.850271	0.2717
Q9PLY5	Cj1693c	rpsH Cj1693c	30S ribosomal protein S8	19	19	16	16	0.938913	0.99149	0.950154	1.03722	0.979444	0.88454	Q9PLY5	Cj1693c	19	16	22	1.68846	0.58087	0.580232	0.949854	0.8985
Q9PLY4	Cj1694c	rpsZ rpsN Cj1694c	30S ribosomal protein S14 type Z	5	5	4	4	0.89658	0.899384	1.15694	1.09533	1.01206	0.77147	Q9PLY4	Cj1694c	6	5	6	1.17991	0.730745	1.05898	0.989877	0.9435
Q9PLY3	Cj1695c	rplE Cj1695c	50S ribosomal protein L5	22	22	23	23	0.887905	0.963038	1.00305	1.03706	0.972763	0.7412	Q9PLY3	Cj1695c	28	22	23	1.15592	0.875564	0.734979	0.922153	0.5634
Q9PLY2	Cj1696c	rplX Cj1696c	50S ribosomal protein L24	12	12	9	9	0.780678	0.827996	1.00893	0.903585	0.880297	0.25581	Q9PLY2	Cj1696c	12	14	14	0.97864	0.497042	0.658194	0.711292	0.111
Q0P7T4	Cj1697c	rplN Cj1697c	50S ribosomal protein L14	23	23	24	24	0.903589	0.961427	0.905388	0.952559	0.930741	0.13737	Q0P7T4	Cj1697c	24	24	30	0.928938	1.04992	0.946666	0.975175	0.5464
Q9PLY0	Cj1698c	rpsQ Cj1698c	30S ribosomal protein S17	9	9	9	9	0.868891	1.01566	0.897954	1.22269	1.0013	0.97261	Q9PLY0	Cj1698c	17	17	17	0.832836	0.563935	0.559899	0.652223	0.0183
Q9PLX9	Cj1699c	rpmC Cj1699c	50S ribosomal protein L29	14	14	16	16	1.2713	1.14868	1.20724	1.04526	1.16812	0.0798	Q9PLX9	Cj1699c	14	16	19	1.01204	1.06436	1.00798	1.02813	0.1962
Q9PLX8	Cj1700c	rplP Cj1700c	50S ribosomal protein L16	12	12	12	12	0.938938	0.959384	1.09519	1.0007	0.998554	0.82997	Q9PLX8	Cj1700c	19	19	19	1.20529	0.601192	0.693958	0.83348	0.4254
Q9PLX7	Cj1701c	rpsC Cj1701c	30S ribosomal protein S3	33	33	34	34	0.968867	0.932766	1.04798	0.932959	0.970643	0.66128	Q9PLX7	Cj1701c	48	44	44	1.89173	0.636756	0.497753	1.00875	0.9852
Q9PLX6	Cj1702c	rplV Cj1702c	50S ribosomal protein L22	10	10	11	11	0.755724	0.745384	1.02528	0.8825	0.852221	0.2074	Q9PLX6	Cj1702c	22	16	20	1.55688	0.632522	0.787791	0.992399	0.9801
Q9PLX5	Cj1703c	rpsS Cj1703c	30S ribosomal protein S19	9	9	10	10	0.921161	0.98567	0.932558	0.941367	0.945189	0.35906	Q9PLX5	Cj1703c	19	19	19	1.00908	1.299	0.756946	1.02168	0.8966
Q9PLX4	Cj1704c	rplB Cj1704c	50S ribosomal protein L2	36	36	34	34	0.934774	0.834463	0.95667	0.825783	0.887923	0.15938	Q9PLX4	Cj1704c	45	46	46	1.29702	1.0401	0.916438	1.08452	0.4928
Q0P7S6	Cj1705c	rplW Cj1705c	50S ribosomal protein L23	7	7	8	8	0.92175	1.0429	1.00326	0.994868	0.990696	0.98777	Q0P7S6	Cj1705c	12	11	9	1.06238	0.688408	1.01316	0.921316	0.5392
Q9PLX2	Cj1706c	rplD Cj1706c	50S ribosomal protein L4	26	26	25	25	0.888199	0.960823	0.95318	0.969388	0.942898	0.45532	Q9PLX2	Cj1706c	30	29	33	0.922169	0.873558	1.03757	0.944433	0.317
Q9PLX1	Cj1707c	rplC Cj1707c	50S ribosomal protein L3	22	22	20	20	0.727331	0.856416	0.73988	0.851978	0.793901	0.055095	Q9PLX1	Cj1707c	35	35	35	0.665246	0.734979	0.493139	0.631121	0.0068
Q9PLX0	Cj1708c	rpsJ Cj1708c	30S ribosomal protein S10	16	16	14	14	1.11124	1.09742	0.994656	1.09828	1.0754	0.1372	Q9PLX0	Cj1708c	23	23	23	1.38156	0.726511	0.719415	0.942494	0.8063
Q0P7S2	Cj1709c	Cj1709c	Pseudouridine synthase (EC 5.4.99.-)	8	8	7	7	1.04061	1.08529	1.07643	1.14335	1.08642	0.0538	Q0P7S2	Cj1709c	12	12	15	1.00397	1.49282	0.723088	1.07329	0.7608
Q0P7S1	Cj1710c	Cj1710c	Ribonuclease J (RNase J) (EC 3.1.-.-)	41	41	41	41	0.909668	1.02044	0.952726	0.951288	0.958531	0.34774	Q0P7S1	Cj1710c	58	54	55	1.04213	1.0161	1.03255	1.03026	0.164
Q9PLW7	Cj1711c	rsmA ksgA Cj1711c	Ribosomal RNA small subunit methyltransferase A (EC 2.1.1.182) (16S rRNA (adenine(1518)-N(6)/adenine(1519)-N(6))-dimethyltransferase) (16S rRNA dimethyladenosine transferase) (16S rRNA dimethylase) (S-adenosylmethionine-6-N', N'-adenosyl(rRNA) dimethyltransferase)	5	5	5	5	1.08399	1.09897	0.967502	1.05107	1.05038	0.13112	Q9PLW7	Cj1711c	ND	ND	ND	ND	ND	ND	ND	ND
Q0P7R9	Cj1712	Cj1712	Putative uncharacterized protein (PNP_UDP_1 domain-containing protein)	10	10	10	10	1.18287	1.04439	1.12099	1.09576	1.111	0.0619	Q0P7R9	Cj1712	3	3	ND	0.740636	0.865378	ND	0.803007	0.0873
Q0P7R8	Cj1713	rlmN Cj1713	Dual-specificity RNA methyltransferase RlmN (EC 2.1.1.-) (EC 2.1.1.192) (23S rRNA (adenine(2503)-C(2))-methyltransferase) (23S rRNA m2A2503 methyltransferase) (Ribosomal RNA large subunit methyltransferase N) (tRNA (adenine(37)-C(2))-methyltransferase) (tRNA m2A37 methyltransferase)	14	14	14	14	0.84905	0.961854	0.852017	1.00903	0.917989	0.11897	Q0P7R8	Cj1713	15	14	15	0.75823	1.17021	0.926036	0.951491	0.7058
Q0P7R6	Cj1715	Cj1715	Putative acetyltransferase	11	11	14	14	1.04818	1.35818	1.16255	1.65381	1.30568	0.1044	Q0P7R6	Cj1715	11	11	11	1.30509	1.50552	1.88647	1.5657	0.0294
Q9PLW2	Cj1716c	leuD Cj1716c	3-isopropylmalate dehydratase small subunit (EC 4.2.1.33) (Alpha-IPM isomerase) (IPMI) (Isopropylmalate isomerase)	16	16	15	15	1.51147	1.54733	1.67012	1.4943	1.55581	0.0011709	Q9PLW2	Cj1716c	ND	ND	ND	ND	ND	ND	ND	ND
Q9PLW1	Cj1717c	leuC Cj1717c	3-isopropylmalate dehydratase large subunit (EC 4.2.1.33) (Alpha-IPM isomerase) (IPMI) (Isopropylmalate isomerase)	31	31	32	32	1.40314	1.38485	1.48644	1.48829	1.44068	0.0029827	Q9PLW1	Cj1717c	20	20	20	1.21469	1.16287	1.79384	1.39047	0.1257
Q9PLW0	Cj1718c	leuB Cj1718c	3-isopropylmalate dehydrogenase (EC 1.1.1.85) (3-IPM-DH) (Beta-IPM dehydrogenase) (IMDH)	25	25	21	21	1.43246	1.48236	1.44204	1.44582	1.45067	0.00018587	Q9PLW0	Cj1718c	10	10	10	1.88949	2.13219	1.7131	1.91159	0.00174
Q9PLV9	Cj1719c	leuA Cj1719c	2-isopropylmalate synthase (EC 2.3.3.13) (Alpha-IPM synthase) (Alpha-isopropylmalate synthase)	17	16	18	17	1.3767	1.26123	1.24381	1.17243	1.26354	0.0032342	Q9PLV9	Cj1719c	17	17	16	1.44512	2.14951	1.41522	1.66995	0.0492
Q0P7R1	Cj1720	Cj1720	Putative uncharacterized protein (DUF5655 domain-containing protein)	25	25	23	23	1.16308	1.19797	1.30008	1.21784	1.21974	0.0083951	Q0P7R1	Cj1720	29	25	23	0.885153	0.90234	0.72259	0.836695	0.0463
Q0P7R0	Cj1721c	Cj1721c	Putative outer membrane protein	3	3	1	1	0.97198	1.12523	0.97264	1.08055	1.0376	0.47275	Q0P7R0	Cj1721c	ND	ND	ND	ND	ND	ND	ND	ND
Q9PLV4	Cj1724c	queF Cj1724c	NADPH-dependent 7-cyano-7-deazaguanine reductase (EC 1.7.1.13) (7-cyano-7-carbaguanine reductase) (NADPH-dependent nitrile oxidoreductase) (PreQ(0) reductase)	9	9	12	12	1.6231	1.58593	2.30118	1.68511	1.79883	0.017374	Q9PLV4	Cj1724c	6	5	6	2.73273	1.50806	1.41705	1.88595	0.0484
Q0P7Q6	Cj1725	Cj1725	Putative periplasmic protein	20	20	17	17	0.972791	1.03152	0.916683	0.962419	0.970853	0.65848	Q0P7Q6	Cj1725	16	17	17	1.11375	1.17592	0.848354	1.04601	0.6707
Q9PLV2	Cj1726c	metA Cj1726c	Homoserine O-succinyltransferase (EC 2.3.1.46) (Homoserine O-transsuccinylase) (HTS)	7	7	9	9	0.781183	0.664138	0.685341	0.604736	0.683849	0.0070324	Q9PLV2	Cj1726c	ND	7	ND	ND	1.0415	ND	1.0415	ND
Q0P7Q4	Cj1727c	metB Cj1727c	Putative O-acetylhomoserine (Thiol)-lyase (EC 2.5.1.49)	41	41	41	41	0.310321	0.365636	0.401712	0.430941	0.377153	0.0001109	Q0P7Q4	Cj1727c	28	22	21	0.809113	1.0061	1.01187	0.94236	0.4359
Q0P7Q2	Cj1729c	flgE2 Cj1729c	Flagellar hook subunit protein FlgE	24	24	22	22	1.10406	1.04789	0.949396	0.988879	1.02256	0.64263	Q0P7Q2	Cj1729c	47	42	44	1.77089	0.900942	0.921361	1.19773	0.5282
Q9PLU8	Cj1731c	ruvC Cj1731c	Crossover junction endodeoxyribonuclease RuvC (EC 3.1.22.4) (Holliday junction nuclease RuvC) (Holliday junction resolvase RuvC)	3	3	3	3	1.24602	1.25315	1.34483	1.09872	1.23568	0.024721	Q9PLU8	Cj1731c	ND	2	ND	ND	1.97208	ND	1.97208	ND

## Sheet: Data S2
Supplementary Data S2. Log2 (area) based on XICs from targeted metabolomics by LC-MS/MS. MH, MH medium versus MH medium supplemented with 5% CE; replicates 1-6. Calculations based on these raw data were made in GraphPad. Only data discussed in this study are provided. ND, not detected; NP, not performed.
Sample	Serine	Lactate	Proline	Aspartate	Cystine	Fumarate	Succinate	UDP-HexNAc	Hypoxanthine	Anserine	Carnosine	Carnitine	Acetylcarnitine
MH1	142189	493035	195098	76108.5	229572	501148	298732	27699.5	105749	19883.5	8498.15	ND	ND
MH2	147966	599770	212638	71584.9	242098	496661	281183	20945.2	107864	31268.8	11058.5	ND	ND
MH3	194400	667859	294437	77195.9	258675	401742	240007	23750.9	82620.5	25331	11494.3	ND	ND
MH4	215201	663204	305332	86458.9	247105	219904	275486	38820.2	105271	24241.5	3486.42	ND	ND
MH5	99850.2	523155	632299	86184.2	205047	188760	317391	33021.1	36773.3	16614.5	9533.18	ND	ND
MH6	156001	699942	802467	79854.3	189824	275416	359987	23742.4	100632	21571.7	5937.81	ND	ND
MH 5% CE	225289	757292	808085	58833.3	159121	458010	342370	9960.7	2.049e+06	168950	53715.6	ND	ND
MH 5% CE	265544	651000	675095	55399.9	202421	539110	370832	8053.47	1.51283e+06	122853	39986	ND	ND
MH 5% CE	248786	663204	815707	60795	153259	635457	315400	6961.47	1.57487e+06	161975	55567.7	ND	ND
MH 5% CE	207693	758546	630279	55401.4	155432	439856	300795	6549.5	1.62218e+06	92505.6	30396.4	ND	ND
MH 5% CE	205028	742854	986509	50117.3	139870	717221	313522	6003.83	2.17593e+06	264044	73870.9	ND	ND
MH 5% CE	206150	812547	760604	48101.7	121313	664218	338548	9278.65	2187351	100246	52518.6	ND	ND
MCLMAN 1	NP	NP	NP	NP	NP	NP	NP	NP	NP	20264.8	8933.95	1552544	3782482
MCLMAN 2	NP	NP	NP	NP	NP	NP	NP	NP	NP	31813.6	23097.5	1985832	4434759
MCLMAN 3	NP	NP	NP	NP	NP	NP	NP	NP	NP	14544.9	13292	1308507	3237802
MCLMAN 4	NP	NP	NP	NP	NP	NP	NP	NP	NP	36825.3	14490.4	1545995	3573514
MCLMAN 5	NP	NP	NP	NP	NP	NP	NP	NP	NP	20536.7	9805.56	1781290	4338482
MCLMAN 6	NP	NP	NP	NP	NP	NP	NP	NP	NP	18957.4	10295.8	1872875	5741852
MCLMAN CE 1	NP	NP	NP	NP	NP	NP	NP	NP	NP	590493	46742	2391989	5934171
MCLMAN CE 2	NP	NP	NP	NP	NP	NP	NP	NP	NP	584014	59382.4	2504110	7351471
MCLMAN CE 3	NP	NP	NP	NP	NP	NP	NP	NP	NP	696239	53874.7	2032628	5298377
MCLMAN CE 4	NP	NP	NP	NP	NP	NP	NP	NP	NP	475646	47339	2535421	7071200
MCLMAN CE 5	NP	NP	NP	NP	NP	NP	NP	NP	NP	416400	46905.4	2387752	5865566
MCLMAN CE 6	NP	NP	NP	NP	NP	NP	NP	NP	NP	361317	40746.5	2394394	7421986

## Sheet: Data S3
Supplementary Data S3. Targeted metabolomics of C. jejuni culture supernatants by LC-MS/MS. Data are expressed as a % of values generated for an uninoculated control (MH or MH + 5% CE incubated without C. jejuni) at each time-point. MH, MH medium versus MH medium supplemented with 5% CE; replicates 1-9. Calculations based on these raw data were made in GraphPad. Only data discussed in this study …
Serine	1	2	3	4	5	6	7	8	9
4hr MH Only	50.93	73.13	36.99	44.84	50.62	38.54	42.95	44.19	53.53
24hr MH Only	5.65493	5.4246	10.0488	4.28263	6.0142	11.9438	4.63262	6.15285	7.28174
48 hr MH Only	4.45381	5.03292	22.2607	3.45321	5.00755	11.9898	3.46491	3.73055	7.76476
72hr MH Only	4.00908	7.71805	11.0767	2.01283	4.26936	8.25721	3.1134	11.2038	7.34195
4hr MH + CE	65.5	66.74	72.76	51.98	59.16	62.51	63.08	67.37	47.4
24hr MH + CE	5.60554	11.6126	4.28359	4.41486	8.25445	6.67285	9.92834	12.3757	ND
48hr MH + CE	5.32583	5.72519	3.94143	4.88671	23.4647	6.14242	9.33341	11.6751	ND
72hr MH + CE	3.84277	9.78873	3.43232	6.83948	17.5811	4.39457	5.54853	17.2427	ND
Proline
4hr MH Only	92.8076	133.902	90.333	93.236	99.4427	97.1169	91.4048	101.137	96.1262
24hr MH Only	7.45239	8.5509	7.51503	7.41865	6.91917	8.21797	8.36147	7.88249	7.79303
48 hr MH Only	1.85434	2.55287	1.91658	2.36811	2.01214	2.46734	2.29011	2.00471	2.03
72hr MH Only	2.28742	2.3049	2.13343	2.3568	1.86957	2.08907	2.46445	2.80758	1.89486
4hr MH + CE	129.451	120.611	120.761	120.595	110.428	108.534	125.884	113.998	112.391
24hr MH + CE	131.904	122.893	97.169	114.499	124.112	112.603	122.875	126.208	100.771
48hr MH + CE	33.5311	35.1682	31.2472	44.1921	41.7666	42.3918	40.3558	31.7649	28.3026
72hr MH + CE	21.1829	17.2898	21.4255	30.2707	31.312	31.3	26.8273	24.0648	23.5115
Aspartate
4hr MH Only	88.7532	107.075	85.588	88.1509	91.4798	92.386	86.1948	69.9494	86.7957
24hr MH Only	11.6564	10.3934	11.7616	11.669	10.9976	11.846	10.3519	8.3092	10.0696
48 hr MH Only	9.58096	8.81768	10.334	9.15642	9.3446	9.77414	8.9802	7.11443	7.75667
72hr MH Only	8.13397	7.4765	9.05386	8.52842	7.48747	7.22471	8.13069	7.46553	6.41541
4hr MH + CE	102.994	90.2521	84.1911	92.5838	90.3087	80.1169	94.6265	100.094	84.2553
24hr MH + CE	11.4495	10.3621	11.7528	10.1679	12.5411	9.41973	11.0989	10.0435	10.6155
48hr MH + CE	10.8983	9.33393	10.3584	10.2673	8.68153	9.7332	11.348	8.77826	8.6652
72hr MH + CE	10.2414	9.55359	11.7324	9.46396	9.20451	11.3512	10.9903	8.58755	9.40535
Glutamate
4hr MH Only	96.6287	112.794	101.352	99.0698	104.814	96.3546	88.2229	85.389	95.8407
24hr MH Only	5.83008	6.83981	7.20764	5.96776	6.1078	7.91493	5.32504	5.68621	7.23074
48 hr MH Only	3.66843	3.98969	4.66413	3.75612	3.9589	5.24371	3.2257	3.27237	3.88322
72hr MH Only	3.0837	3.282	4.37008	3.46134	3.03723	3.7651	2.90767	4.27332	3.69937
4hr MH + CE	119.109	112.171	100.55	101.353	105.183	101.942	110.101	115.062	99.0628
24hr MH + CE	17.6345	15.1568	14.0829	7.56809	9.39539	9.88305	11.2943	12.6166	10.2881
48hr MH + CE	4.17016	4.56992	5.11219	3.24269	3.50801	5.53661	4.32225	3.82708	3.82428
72hr MH + CE	3.57534	3.61126	5.07311	2.81079	2.94853	3.73606	3.27468	3.33344	2.81377
Asparagine
4hr MH Only	34.2042	46.1989	32.7772	41.4703	31.8579	32.1903	26.9393	29.4005	45.9219
24hr MH Only	24.5953	27.6338	43.0228	18.9233	19.0484	28.9498	16.581	14.7904	31.5149
48 hr MH Only	19.1491	15.668	40.0737	13.9441	13.8002	22.0296	14.5477	13.1442	24.152
72hr MH Only	8.66936	8.15437	27.5516	13.8112	13.2323	4.94538	5.82355	12.1859	16.0145
4hr MH + CE	45.1699	52.5686	77.54	48.622	41.218	46.26	58.5417	55.6453	50.3199
24hr MH + CE	22.5276	27.0302	20.2127	18.2923	26.505	30.0158	24.1132	26.2152	28.9159
48hr MH + CE	13.007	17.4621	29.897	12.702	16.5162	4.53153	9.45444	15.6344	20.1142
72hr MH + CE	4.19597	7.03089	19.7074	5.82221	10.1806	13.7155	9.2397	13.2035	19.3968
Carnosine
4hr MH Only	86.3027	98.3627	119.196	99.0547	108.531	85.3927	92.8059	98.1797	76.7209
24hr MH Only	73.3938	101.345	96.9382	81.5017	87.7866	70.9304	71.1841	84.3981	74.6994
48 hr MH Only	61.9204	68.5822	60.0925	69.7662	76.7373	86.8817	59.9957	67.278	59.8986
72hr MH Only	40.8948	46.0237	45.7754	46.5458	49.0908	40.0077	41.4555	37.5625	47.7136
4hr MH + CE	96.7612	89.9106	93.3232	110.304	99.4971	79.7702	ND	ND	ND
24hr MH + CE	89.9187	115.05	100.415	102.155	106.661	89.1968	ND	ND	ND
48hr MH + CE	82.1257	92.9363	98.6351	102.055	93.2985	73.0474	ND	ND	ND
72hr MH + CE	63.5564	76.2141	76.3233	77.9387	73.5582	68.7083	ND	ND	ND
Anserine
4hr MH Only	ND	ND	ND	ND	ND	ND	ND	ND	ND
24hr MH Only	ND	ND	ND	ND	ND	ND	ND	ND	ND
48 hr MH Only	ND	ND	ND	ND	ND	ND	ND	ND	ND
72hr MH Only	ND	ND	ND	ND	ND	ND	ND	ND	ND
4hr MH + CE	109.424	104.777	95.0199	100.696	90.9423	92.1985	103.631	101.979	89.3781
24hr MH + CE	123.576	107.392	77.0391	89.2704	112.536	106.295	113.009	111.068	80.2089
48hr MH + CE	94.5513	116.356	86.3038	89.0142	94.5596	102.23	109.525	90.1476	73.3494
72hr MH + CE	72.4338	82.6637	82.1789	66.3167	77.1602	79.6734	82.3501	66.6813	60.5948
Succinate
4hr MH Only	355.013	647.55	367.55	602.352	420.142	584.405	NP	NP	NP
24hr MH Only	38.8943	122.978	71.7384	110.517	131.934	96.2352	NP	NP	NP
48 hr MH Only	70.5392	83.7296	59.5109	94.0481	105.007	78.2572	NP	NP	NP
72hr MH Only	66.634	60.6615	42.9501	115.144	70.4993	69.7043	NP	NP	NP
4hr MH + CE	361.509	206.576	269.658	259.962	409.836	372.356	NP	NP	NP
24hr MH + CE	324.531	190.581	130.79	233.592	162.589	282.679	NP	NP	NP
48hr MH + CE	86.6197	74.2225	63.7239	72.1495	66.8466	53.2268	NP	NP	NP
72hr MH + CE	99.8617	45.5517	45.6516	63.2053	46.3349	49.0731	NP	NP	NP
